# Supplementary material for: The 2014-17 Global Coral Bleaching Event: The Most Severe and Widespread Coral Reef Destruction
Source: Research Square preprint supplement (doi:10.21203/rs.3.rs-1555992/v1), 2022-06-06
Supplement: Supplementary file 2 [file eb3aa3bf568fde2d5a2e9275.xlsx]

## Sheet: Extended Data Table 2
Extended Data Table 2 for Eakin et al. The 2014-17 Global Coral Bleaching Event: The Most Severe and Widespread Coral Reef Destruction.
Bleaching and mortality observation database consisting of all aerial and in situ survey observations collated from the period of June 2014 – May 2017 during GCBE3.
COLUMN	COLUMN CONTENTS	COLUMN DESCRIPTION
	Contents provided by Coral Reef Watch
A	DATA_ID	ID number unqiue to each observation. Format of DATA_ID = XX_value, where XX = Country acronym. All country acronyms are listed in 'Regions and Countries' tab
B	REGION	Region observation was classified as being in. All region acronyms are listed in 'Regions and Countries' tab.
C	GCBE3 REGION	GCBE3 Region observation was classified as being in for use in Figure 4.
D	REGIONAL_VIRTUAL_STATION_NAME	Name of the closest Regional Virtual Station (RVS) each observation belongs to.
E	REGIONAL_VIRTUAL_STATION_NUMBER	Closest Regional Virtual Station (RVS) each observation belongs to. Each RVS was assigned a unique numeric code.
	Contents provided by Data Contributor
F	COUNTRY	Country names (following Reefbase convention at: http://www.reefbase.org/global_database/default.aspx?section=r1). All country acronyms are listed in 'Regions and Countries' tab.
G	LOCATION	The state, town or nearest community
H	SITE_NAME	Name of the dive site, if available, or the local community
I	LATITUDE	In decimal degrees
J	LONGITUDE	In decimal degrees
K	DATE	Date of observation
L	MONTH	Month of observation
M	YEAR	Year of observation
N	MAX_DEPTH	Maximum depth of survey (in meters, where available)
O	BLEACHING_SEVERITY_CODE	See Bleaching Severity Key in 'Codes' tab
P	PERCENT_BLEACHED	Percent of total coral area or number of coral colonies bleached on date of observation (original values as submitted). Includes paling.
Q	MID-POINT_OF_RANGE_(% BLEACHING)	If original % bleached value was submitted was a range, this is the mid-point value of the range
R	MORTALITY_CODE	See Mortality Severity Key in 'Codes' tab
S	PERCENT_MORTALITY	Percent of total coral area or number of coral colonies with mortality most likely due to bleaching on date of observation (original values as submitted). Includes partial mortality.
T	MID-POINT_OF_RANGE_(% MORTALITY)	If original % mortality value was submitted was a range, this is the mid-point value of the range.
U	MORTALITY_TIME_ ADJUST	Where % mortality due to bleaching was calculated as the difference in total coral cover between two time points. See 'Comments' for details on the time periods used for the observation. 0 = % mortality values were not adjusted by time, 1 = % mortality values were adjusted by time
	Contents provided by Coral Reef Watch
V	DATE_BLEACHING_YEAR_DHW_MAX	Date during bleaching year when maximum DHW was reached at the pixel the observation is located in.
W	OBS_TIMING	Indicates if observation occurred before, after, or during annual maximum DHW according to bleaching year. 0 = observation occurred before bleaching year maximum DHW, 1 = observation occurred during bleaching year maximum DHW, 2 = observation occurred after bleaching year maximum DHW.
X	DHW_TO_USE	Indicates DHW value to use for each observation. If the observation occurred before annual maximum DHW according to bleaching year or > 90 days after the last day when Hot Spot values > 1 following annual maximum DHW, the daily DHW value is included here. If the observation occurred < 90 days after the last day when Hot Spot values > 1 following annual max DHW at the observation site, the annual …
Y	DAILY_DHW	DHW value calculated on date of observation for the 5km by 5km pixel the coordinates of the observation fall in. For observations with no date (but has month and year values), the 15th of the month was used as a default value to calculate this.
Z	BLEACHING_YEAR_MAX_DHW	Maximum DHW value for the pixel the observation is in (as described above) during the bleaching year (June 1 to May 31) the observation was recorded in.
AA	DHW_OFFSET	Observations very close to land initially obtained daily DHW values from a land pixel. To correct for this, the nearest open water pixel was found and DHW values were extracted for this pixel. 0 = DHW values were not offset for the observation, 1 = DHW values were offset for the observation.
AB	#_DAYS_HS>=1	Number of days between observation and date when Hot Spot values last reached >=1 proceeding peak heat stress (date of annual max DHW), where N/A = observations that occurred before peak heat stress in any one bleaching year, and values (# of days) are included for observations that occurred after the peak heat stress in any one bleaching year.
	Contents provided by Data Contributor
AC	SURVEY_TYPE	Survey type (In-situ or Aerial surveys)
AD	SOURCE	Initial source of the data (e.g. database, program, individual)
AE	CITATION	Manuscript or report describing the observation (where applicable)
AF	COMMENTS	Any comments pertaining to the observation
AG	DATA_POINT_OF_CONTACT	Name of primary contributer (i.e. name of person who collected the data and/or person NOAA can contact with any questions about the data)
AH	POC_E-MAIL_ADDRESS	E-mail address of DATA POINT OF CONTACT (where available)
	Contents provided by Coral Reef Watch
AI	DATA_TYPE_CODE	See Data Type Code Key in 'Codes' tab
AJ	QA_CODE	See QA Code key in 'Codes' tab
AK	MAX_DHW_EVENT_1	Maximum DHW reached at the pixel the observation is located in during the first most recent bleaching-level heat stress event, since the observation occurred.
AL	MAX_DHW_EVENT_2	Maximum DHW reached at the pixel the observation is located in during the second most recent bleaching-level heat stress event, since the observation occurred.
AM	MAX_DHW_EVENT_3	Maximum DHW reached at the pixel the observation is located in during the third most recent bleaching-level heat stress event, since the observation occurred.
AN	MAX_DHW_EVENT_4	Maximum DHW reached at the pixel the observation is located in during the fourth most recent bleaching-level heat stress event, since the observation occurred.
AO	MAX_DHW_EVENT_5	Maximum DHW reached at the pixel the observation is located in during the fifth most recent bleaching-level heat stress event, since the observation occurred.
AP	LATITUDE_PIXEL	Latitude of pixel observation is located in. This is the pixel used in DHW value extraction.
AQ	LONGITUDE_PIXEL	Latitude of pixel observation is located in. This is the pixel used in DHW value extraction.
AR	PIXEL_Y_INDEX	Vertical location of pixel observation is located in based on x,y grid of 0.5x0.5° pixel matrix.
AS	PIXEL_X_INDEX	Horizontal location of pixel observation is located in based on x,y grid of 0.5x0.5° pixel matrix.
AT	UNIQUE_PIXEL_ID	Pixel number based on x,y grid of 0.5x0.5° pixel matrix.
AU	BLEACHING_YEAR	Bleaching date converted to bleaching years June 2014-May 2015, June 2015-May 2016, June 2016-May 2017
AV	BLEACHING_SEVERITY_CODE_FIXED	Value from column O adjusted to address June start date of bleaching years
AW	BLEACHING_CODE_ROW_ALTERED? Y/N	Indication if value in AV was adjusted from value in O.
AX	BLEACHING_TO_USE	Value from Row P
AY	MORTALITY_SEVERITY_CODE_FIXED	Value from column R adjusted to address June start date of bleaching years
AZ	MORTALITY_CODE_ROW_ALTERED? Y/N	Indication if value in AY was adjusted from value in R.
BA	MORTALITY_TO_USE	Value from Row S

## Sheet: Database_v7_041619 + column C
DATA_ID	REGION	GCBE3 REGION	REGIONAL_VIRTUAL_STATION_NAME	REGIONAL_VIRTUAL_STATION_NUMBER	COUNTRY	LOCATION	SITE_NAME	LATITUDE	LONGITUDE	DATE	MONTH	YEAR	MAX_DEPTH	BLEACHING_SEVERITY_CODE	PERCENT_BLEACHED	MID-POINT_OF_RANGE_(% BLEACHING)	MORTALITY_CODE	PERCENT_MORTALITY	MID-POINT_OF_RANGE_(% MORTALITY)	MORTALITY_TIME_ ADJUST	DATE_BLEACHING_YEAR_DHW_MAX	OBS_TIMING	DHW_TO_USE	DAILY_DHW	BLEACHING_YEAR_MAX_DHW	DHW_OFFSET	#_DAYS_HS>=1	SURVEY_TYPE	SOURCE	CITATION	COMMENTS	DATA_POINT_OF_CONTACT	POC_E-MAIL_ADDRESS	DATA_TYPE_CODE	QA_CODE	MAX_DHW_EVENT_1	MAX_DHW_EVENT_2	MAX_DHW_EVENT_3	MAX_DHW_EVENT_4	MAX_DHW_EVENT_5	PIXEL_LATITUDE	PIXEL_LONGITUDE	PIXEL_Y_INDEX	PIXEL_X_INDEX	UNIQUE_PIXEL_ID	BLEACHING_YEAR	BLEACHING_SEVERITY_CODE_FIXED	BLEACHING_CODE_ROW_ALTERED? Y/N	BLEACHING_TO_USE
AS_1	AP	11	Samoas	144	American Samoa	Tutuila	Fagasa	-14.2838	-170.723	2	3	2015	18	2	25	N/A	-1	N/A	N/A	0	4/3/2015	0	4.68	4.68	7.24	0	N/A	In-situ	NOAA CREP American Samoa reef Assessment and Monitoring Cruise (AMSCRMP)	N/A	Original date range given = 26 Feb to 7 March. Mid-point of these dates is entered here.	CRAG_American Samoa	georgia.coward@crag.as	AA	1	N/A	N/A	N/A	N/A	N/A	-14.275	-170.725	1514	185	10900985	2014-2015	2	0	25
AS_10	AP	11	Samoas	144	American Samoa	Tutuila	Fagasa	-14.2838	-170.723	18	1	2017	11	1	10	N/A	-1	N/A	N/A	0	2/7/2017	0	4.41	4.41	7.61	0	N/A	In-situ	CRAG_American Samoa	N/A	Noticeably more bleaching was observed on the deeper reef slope areas between 10-40 ft than the shallow reef flat, in particularly Porites massive colonies, of which 50-60% were bleached. Acropora tables and ….(mystery encrusting coral) were partially to completely bleached and total bleaching was estimated at around 10% due to the large number of Porties massive colonies.	CRAG_American Samoa	georgia.coward@crag.as	AA	2	3.9	7.24	N/A	N/A	N/A	-14.275	-170.725	1514	185	10900985	2016-2017	1	0	10
AS_11	AP	11	Samoas	144	American Samoa	Tutuila	Fagasa	-14.2838	-170.722	18	1	2017	1.2	1	1-10	5.5	-1	N/A	N/A	0	2/7/2017	0	4.41	4.41	7.61	0	N/A	In-situ	CRAG_American Samoa	N/A	On the shallow reef flat at 3 ft only minor bleaching was observed, mainly of Acropora branching, Acropora tables, Pocillopora. On the reef crest around 6 ft a few Porites massive colonies were partially bleached, and some Acropora tables, whereas similar colonies in the shallower areas were not observed to be bleached.	CRAG_American Samoa	georgia.coward@crag.as	AA	2	3.9	7.24	N/A	N/A	N/A	-14.275	-170.725	1514	185	10900985	2016-2017	1	0	5.5
AS_12	AP	11	Samoas	144	American Samoa	Tutuila	Leone	-14.343	-170.789	23	1	2017	11	1	1-10	5.5	-1	N/A	N/A	0	2/8/2017	0	4.75	4.75	7.53	1	N/A	In-situ	CRAG_American Samoa	N/A	some light bleaching observed on Pocillopora, Isopora, Coscinaria, and Montipora colonies, with severe bleaching observed on a Porites massive colonies.	CRAG_American Samoa	georgia.coward@crag.as	AA	2	3.44	7.5	N/A	N/A	N/A	-14.375	-170.775	1512	184	10886584	2016-2017	1	0	5.5
AS_13	AP	11	Samoas	144	American Samoa	Tutuila	Airport Pools	-14.3283	-170.701	6	1	2017	3	1	1-10	5.5	-1	N/A	N/A	0	2/8/2017	0	3.03	3.03	7.57	0	N/A	In-situ	CRAG_American Samoa	N/A	light bleaching on branching tips were observed in the Airport pools in January 2017, with complete bleaching of some Fungia corals.	CRAG_American Samoa	georgia.coward@crag.as	AA	2	3.65	6.89	N/A	N/A	N/A	-14.325	-170.725	1513	185	10893785	2016-2017	1	0	5.5
AS_14	AP	11	Samoas	144	American Samoa	Amouli	Reef flats	-14.2772	-170.588	3	3	2017	N/A	3	90	N/A	-1	N/A	N/A	0	4/1/2017	0	7.06	7.06	8.99	0	N/A	In-situ	Douglas Fenner, Contractor for NOAA NMFS Protected Species, Pago Pago, American Samoa	N/A	Bleaching value reported from personal observation by Douglas Fenner	Douglas Fenner	douglasfennertassi@gmail.com	AA	1	8.55	3.9	6.19	N/A	N/A	-14.275	-170.575	1514	188	10900988	2016-2017	3	0	90
AS_15	AP	11	Samoas	144	American Samoa	Alofau	Reef flats	-14.2759	-170.607	4	3	2017	N/A	2	28	N/A	1	1	N/A	0	2/13/2017	2	8.14	6.37	8.14	0	19	In-situ	Douglas Fenner, Contractor for NOAA NMFS Protected Species, Pago Pago, American Samoa	N/A	Bleaching value reported from personal observation by Douglas Fenner	Douglas Fenner	douglasfennertassi@gmail.com	AAAA	1	3.88	6.5	N/A	N/A	N/A	-14.275	-170.625	1514	187	10900987	2016-2017	2	0	28
AS_16	AP	11	Samoas	144	American Samoa	Gataivai	N/A	-14.2836	-170.676	13	3	2017	N/A	1	5	N/A	-1	N/A	N/A	0	2/8/2017	2	8.24	6.43	8.24	0	2	In-situ	Douglas Fenner, Contractor for NOAA NMFS Protected Species, Pago Pago, American Samoa	N/A	Bleaching value reported from personal observation by Douglas Fenner	Douglas Fenner	douglasfennertassi@gmail.com	AA	1	3.9	7.03	N/A	N/A	N/A	-14.275	-170.675	1514	186	10900986	2016-2017	1	0	5
AS_17	AP	11	Samoas	144	American Samoa	Onososopo	N/A	-14.2824	-170.665	13	3	2017	N/A	2	42	N/A	1	1.4	N/A	0	2/8/2017	2	8.24	6.43	8.24	0	2	In-situ	Douglas Fenner, Contractor for NOAA NMFS Protected Species, Pago Pago, American Samoa	N/A	Bleaching value reported from personal observation by Douglas Fenner	Douglas Fenner	douglasfennertassi@gmail.com	AAAA	1	3.9	7.03	N/A	N/A	N/A	-14.275	-170.675	1514	186	10900986	2016-2017	2	0	42
AS_18	AP	11	Samoas	144	American Samoa	Gataivai	N/A	-14.2836	-170.676	13	7	2017	N/A	0	0	N/A	-1	N/A	N/A	0	6/1/2017	2	3.87	0.9	3.87	0	67	In-situ	Douglas Fenner, Contractor for NOAA NMFS Protected Species, Pago Pago, American Samoa	N/A	Bleaching value reported from personal observation by Douglas Fenner	Douglas Fenner	douglasfennertassi@gmail.com	AA	1	8.24	3.9	7.03	N/A	N/A	-14.275	-170.675	1514	186	10900986	2016-2017	0	0	0
AS_2	AP	11	Samoas	144	American Samoa	Tutuila	Fagatele Bay	-14.3632	-170.762	2	3	2015	18	2	25	N/A	-1	N/A	N/A	0	4/3/2015	0	4.65	4.65	7.5	0	N/A	In-situ	NOAA CREP American Samoa reef Assessment and Monitoring Cruise (AMSCRMP)	N/A	Original date range given = 26 Feb to 7 March. Mid-point of these dates is entered here. At this particular location the bleached taxa included mainly encrusting colonies of Isopora, as well as some Acropora, Hydnophora, Leptoria, Platygyra, and Porites. Coordinates were estimated based on site and location.	CRAG_American Samoa	georgia.coward@crag.as	AA	1	N/A	N/A	N/A	N/A	N/A	-14.375	-170.775	1512	184	10886584	2014-2015	2	0	25
AS_274	AP	11	Samoas	144	American Samoa	Faga'alu Bay	Transect number: ST1	-14.2913	-170.679	25	2	2015	N/A	0	0	N/A	-1	N/A	N/A	0	4/3/2015	0	3.69	3.69	7.03	0	N/A	In-situ	Kelley Anderson Tagarino, University of Hawaii Sea Grant College Program	N/A	Coordinates of site estimated from the map on this NOAA website that describes results from the permananet transects: https://pifscblog.wordpress.com/2013/03/01/coral-development-fagaalu/ (accessed Aug 3 2018).	Kelley Anderson Tagarino, University of Hawaii Sea Grant College Program	kelleyat@hawaii.edu	AA	1	N/A	N/A	N/A	N/A	N/A	-14.275	-170.675	1514	186	10900986	2014-2015	0	0	0
AS_275	AP	11	Samoas	144	American Samoa	Faga'alu Bay	Transect number: ST2	-14.2915	-170.68	25	2	2015	N/A	0	0	N/A	-1	N/A	N/A	0	4/3/2015	0	3.69	3.69	7.03	0	N/A	In-situ	Kelley Anderson Tagarino, University of Hawaii Sea Grant College Program	N/A	Coordinates of site estimated from the map on this NOAA website that describes results from the permananet transects: https://pifscblog.wordpress.com/2013/03/01/coral-development-fagaalu/ (accessed Aug 3 2018).	Kelley Anderson Tagarino, University of Hawaii Sea Grant College Program	kelleyat@hawaii.edu	AA	1	N/A	N/A	N/A	N/A	N/A	-14.275	-170.675	1514	186	10900986	2014-2015	0	0	0
AS_276	AP	11	Samoas	144	American Samoa	Faga'alu Bay	Transect number: NT1	-14.2907	-170.68	25	2	2015	N/A	0	0	N/A	-1	N/A	N/A	0	4/3/2015	0	3.69	3.69	7.03	0	N/A	In-situ	Kelley Anderson Tagarino, University of Hawaii Sea Grant College Program	N/A	Coordinates of site estimated from the map on this NOAA website that describes results from the permananet transects: https://pifscblog.wordpress.com/2013/03/01/coral-development-fagaalu/ (accessed Aug 3 2018).	Kelley Anderson Tagarino, University of Hawaii Sea Grant College Program	kelleyat@hawaii.edu	AA	1	N/A	N/A	N/A	N/A	N/A	-14.275	-170.675	1514	186	10900986	2014-2015	0	0	0
AS_277	AP	11	Samoas	144	American Samoa	Faga'alu Bay	Transect number: NT2	-14.2908	-170.68	25	2	2015	N/A	0	0	N/A	-1	N/A	N/A	0	4/3/2015	0	3.69	3.69	7.03	0	N/A	In-situ	Kelley Anderson Tagarino, University of Hawaii Sea Grant College Program	N/A	Coordinates of site estimated from the map on this NOAA website that describes results from the permananet transects: https://pifscblog.wordpress.com/2013/03/01/coral-development-fagaalu/ (accessed Aug 3 2018).	Kelley Anderson Tagarino, University of Hawaii Sea Grant College Program	kelleyat@hawaii.edu	AA	1	N/A	N/A	N/A	N/A	N/A	-14.275	-170.675	1514	186	10900986	2014-2015	0	0	0
AS_278	AP	11	Samoas	144	American Samoa	Faga'alu Bay	Transect number: ST1	-14.2913	-170.679	24	9	2015	N/A	0	0	N/A	-1	N/A	N/A	0	4/9/2016	0	0	0	3.9	0	N/A	In-situ	Kelley Anderson Tagarino, University of Hawaii Sea Grant College Program	N/A	Coordinates of site estimated from the map on this NOAA website that describes results from the permananet transects: https://pifscblog.wordpress.com/2013/03/01/coral-development-fagaalu/ (accessed Aug 3 2018).	Kelley Anderson Tagarino, University of Hawaii Sea Grant College Program	kelleyat@hawaii.edu	AA	1	7.03	N/A	N/A	N/A	N/A	-14.275	-170.675	1514	186	10900986	2015-2016	0	0	0
AS_279	AP	11	Samoas	144	American Samoa	Faga'alu Bay	Transect number: ST2	-14.2915	-170.68	24	9	2015	N/A	0	0	N/A	-1	N/A	N/A	0	4/9/2016	0	0	0	3.9	0	N/A	In-situ	Kelley Anderson Tagarino, University of Hawaii Sea Grant College Program	N/A	Coordinates of site estimated from the map on this NOAA website that describes results from the permananet transects: https://pifscblog.wordpress.com/2013/03/01/coral-development-fagaalu/ (accessed Aug 3 2018).	Kelley Anderson Tagarino, University of Hawaii Sea Grant College Program	kelleyat@hawaii.edu	AA	1	7.03	N/A	N/A	N/A	N/A	-14.275	-170.675	1514	186	10900986	2015-2016	0	0	0
AS_280	AP	11	Samoas	144	American Samoa	Faga'alu Bay	Transect number: NT1	-14.2907	-170.68	24	9	2015	N/A	0	0	N/A	-1	N/A	N/A	0	4/9/2016	0	0	0	3.9	0	N/A	In-situ	Kelley Anderson Tagarino, University of Hawaii Sea Grant College Program	N/A	Coordinates of site estimated from the map on this NOAA website that describes results from the permananet transects: https://pifscblog.wordpress.com/2013/03/01/coral-development-fagaalu/ (accessed Aug 3 2018).	Kelley Anderson Tagarino, University of Hawaii Sea Grant College Program	kelleyat@hawaii.edu	AA	1	7.03	N/A	N/A	N/A	N/A	-14.275	-170.675	1514	186	10900986	2015-2016	0	0	0
AS_281	AP	11	Samoas	144	American Samoa	Faga'alu Bay	Transect number: NT2	-14.2908	-170.68	24	9	2015	N/A	0	0	N/A	-1	N/A	N/A	0	4/9/2016	0	0	0	3.9	0	N/A	In-situ	Kelley Anderson Tagarino, University of Hawaii Sea Grant College Program	N/A	Coordinates of site estimated from the map on this NOAA website that describes results from the permananet transects: https://pifscblog.wordpress.com/2013/03/01/coral-development-fagaalu/ (accessed Aug 3 2018).	Kelley Anderson Tagarino, University of Hawaii Sea Grant College Program	kelleyat@hawaii.edu	AA	1	7.03	N/A	N/A	N/A	N/A	-14.275	-170.675	1514	186	10900986	2015-2016	0	0	0
AS_282	AP	11	Samoas	144	American Samoa	Faga'alu Bay	Transect number: ST1	-14.2913	-170.679	5	5	2016	N/A	0	0.36	N/A	-1	N/A	N/A	0	4/9/2016	2	3.9	3.53	3.9	0	26	In-situ	Kelley Anderson Tagarino, University of Hawaii Sea Grant College Program	N/A	Coordinates of site estimated from the map on this NOAA website that describes results from the permananet transects: https://pifscblog.wordpress.com/2013/03/01/coral-development-fagaalu/ (accessed Aug 3 2018).	Kelley Anderson Tagarino, University of Hawaii Sea Grant College Program	kelleyat@hawaii.edu	AA	1	7.03	N/A	N/A	N/A	N/A	-14.275	-170.675	1514	186	10900986	2015-2016	1	1	0.36
AS_283	AP	11	Samoas	144	American Samoa	Faga'alu Bay	Transect number: ST2	-14.2915	-170.68	5	5	2016	N/A	0	0	N/A	-1	N/A	N/A	0	4/9/2016	2	3.9	3.53	3.9	0	26	In-situ	Kelley Anderson Tagarino, University of Hawaii Sea Grant College Program	N/A	Coordinates of site estimated from the map on this NOAA website that describes results from the permananet transects: https://pifscblog.wordpress.com/2013/03/01/coral-development-fagaalu/ (accessed Aug 3 2018).	Kelley Anderson Tagarino, University of Hawaii Sea Grant College Program	kelleyat@hawaii.edu	AA	1	7.03	N/A	N/A	N/A	N/A	-14.275	-170.675	1514	186	10900986	2015-2016	0	0	0
AS_284	AP	11	Samoas	144	American Samoa	Faga'alu Bay	Transect number: NT1	-14.2907	-170.68	24	3	2016	N/A	0	0	N/A	-1	N/A	N/A	0	4/9/2016	0	1.04	1.04	3.9	0	N/A	In-situ	Kelley Anderson Tagarino, University of Hawaii Sea Grant College Program	N/A	Coordinates of site estimated from the map on this NOAA website that describes results from the permananet transects: https://pifscblog.wordpress.com/2013/03/01/coral-development-fagaalu/ (accessed Aug 3 2018).	Kelley Anderson Tagarino, University of Hawaii Sea Grant College Program	kelleyat@hawaii.edu	AA	1	7.03	N/A	N/A	N/A	N/A	-14.275	-170.675	1514	186	10900986	2015-2016	0	0	0
AS_285	AP	11	Samoas	144	American Samoa	Faga'alu Bay	Transect number: NT2	-14.2908	-170.68	24	3	2016	N/A	0	0	N/A	-1	N/A	N/A	0	4/9/2016	0	1.04	1.04	3.9	0	N/A	In-situ	Kelley Anderson Tagarino, University of Hawaii Sea Grant College Program	N/A	Coordinates of site estimated from the map on this NOAA website that describes results from the permananet transects: https://pifscblog.wordpress.com/2013/03/01/coral-development-fagaalu/ (accessed Aug 3 2018).	Kelley Anderson Tagarino, University of Hawaii Sea Grant College Program	kelleyat@hawaii.edu	AA	1	7.03	N/A	N/A	N/A	N/A	-14.275	-170.675	1514	186	10900986	2015-2016	0	0	0
AS_3	AP	11	Samoas	144	American Samoa	Tutuila	Amalau	-14.252	-170.659	19	1	2017	11	1	1-10	5.5	-1	N/A	N/A	0	2/8/2017	0	4.87	4.87	8.24	0	N/A	In-situ	CRAG_American Samoa	N/A	Light bleaching of Astreopora, Acropora branching / digitate, Acropora tables, and Pocillopora	CRAG_American Samoa	georgia.coward@crag.as	AA	2	3.9	7.03	N/A	N/A	N/A	-14.275	-170.675	1514	186	10900986	2016-2017	1	0	5.5
AS_4	AP	11	Samoas	144	American Samoa	Tutuila	Amanave	-14.3278	-170.832	23	1	2017	11	1	1-10	5.5	-1	N/A	N/A	0	2/8/2017	0	5.06	5.06	7.82	1	N/A	In-situ	CRAG_American Samoa	N/A	Very little bleaching, although some pale Acropora and Leptastrea purpurea.	CRAG_American Samoa	georgia.coward@crag.as	AA	2	4.24	8.31	N/A	N/A	N/A	-14.325	-170.875	1513	182	10893782	2016-2017	1	0	5.5
AS_5	AP	11	Samoas	144	American Samoa	Tutuila	Aoa	-14.2585	-170.589	19	1	2017	11	1	1-10	5.5	-1	N/A	N/A	0	4/1/2017	0	4.82	4.82	8.99	0	N/A	In-situ	CRAG_American Samoa	N/A	Very light bleaching on some Acropora and Pocillopora branching coral colonies.	CRAG_American Samoa	georgia.coward@crag.as	AA	2	3.9	6.19	N/A	N/A	N/A	-14.275	-170.575	1514	188	10900988	2016-2017	1	0	5.5
AS_6	AP	11	Samoas	144	American Samoa	Tutuila	Alofau	-14.2749	-170.606	15	3	2017	N/A	3	90	N/A	-1	N/A	N/A	0	2/13/2017	2	8.14	6.46	8.14	0	0	In-situ	National park Service (NPS)	N/A	Original date range given = March-April 2017. Mid-point of these dates is entered here. In the shallower reef flat areas and pools, staghorn corals bleached intensively with significant mortality, in particular at Alofau pools where they were observed to be completely white and well over 90% were bleached. Coordinates were estimated based on site and location.	CRAG_American Samoa	georgia.coward@crag.as	AA	1	3.88	6.5	N/A	N/A	N/A	-14.275	-170.625	1514	187	10900987	2016-2017	3	0	90
AS_7	AP	11	Samoas	144	American Samoa	Tutuila	Alofau	-14.2749	-170.606	15	4	2017	N/A	3	90	N/A	-1	N/A	N/A	0	2/13/2017	2	8.14	6.67	8.14	0	6	In-situ	National park Service (NPS)	N/A	Original date range given = March-April 2017. Mid-point of these dates is entered here. In the shallower reef flat areas and pools, staghorn corals bleached intensively with significant mortality, in particular at Alofau pools where they were observed to be completely white and well over 90% were bleached. Coordinates were estimated based on site and location.	CRAG_American Samoa	georgia.coward@crag.as	AA	1	3.88	6.5	N/A	N/A	N/A	-14.275	-170.625	1514	187	10900987	2016-2017	3	0	90
AS_8	AP	11	Samoas	144	American Samoa	Tutuila	Fagaalu	-14.2921	-170.68	19	1	2017	11	1	1-10	5.5	-1	N/A	N/A	0	2/8/2017	0	4.87	4.87	8.24	0	N/A	In-situ	CRAG_American Samoa	N/A	some light bleaching observed on Favia stellegria, Hydnophora, Fungia, Pocillopora and Montastrea curta.	CRAG_American Samoa	georgia.coward@crag.as	AA	2	3.9	7.03	N/A	N/A	N/A	-14.275	-170.675	1514	186	10900986	2016-2017	1	0	5.5
AS_9	AP	11	Samoas	144	American Samoa	Tutuila	Fagamalo	-14.2977	-170.811	23	1	2017	11	1	1-10	5.5	-1	N/A	N/A	0	2/8/2017	0	5.26	5.26	8.06	0	N/A	In-situ	CRAG_American Samoa	N/A	some light bleaching of Acropora tables, branching / digitate, Massive Porites, Montipora, Goniastrea, Astreopora, Favia, Pocillopora, Favites and soft coral. Quite a few Porites massive colonies were fully bleached	CRAG_American Samoa	georgia.coward@crag.as	AA	2	4.45	8.33	N/A	N/A	N/A	-14.275	-170.825	1514	183	10900983	2016-2017	1	0	5.5
AS_X_1	AP	11	Samoas	144	American Samoa	Tutuila	FAGAA_NO_Mid_Forereef	-14.2884	-170.678	9	11	2015	11.5824	0	0	N/A	-1	N/A	N/A	0	4/9/2016	0	0	0	3.9	0	N/A	In-situ	NOAA Pacific Islands Fisheries Science Center	N/A	N/A	Courtney Couch	courtney.s.couch@noaa.gov	AA	1	7.03	N/A	N/A	N/A	N/A	-14.275	-170.675	1514	186	10900986	2015-2016	0	0	0
AS_X_10	AP	11	Samoas	144	American Samoa	Ofu & Olosega	Ofu & Olosega_Deep_Forereef	-14.1647	-169.642	13	3	2015	20.4216	1	2.46508	N/A	0	0	N/A	1	4/6/2015	0	3.81	3.81	8.17	0	N/A	In-situ	NOAA Pacific Islands Fisheries Science Center	N/A	% coral mortality calculated as difference in % live coral cover at site in (2010-2015)/(% live coral cover in 2010)*100	Courtney Couch	courtney.s.couch@noaa.gov	AAAA	1	N/A	N/A	N/A	N/A	N/A	-14.175	-169.625	1516	207	10915407	2014-2015	1	0	2.465
AS_X_11	AP	11	Samoas	144	American Samoa	Ofu & Olosega	Ofu & Olosega_Mid_Forereef	-14.1628	-169.663	13	3	2015	14.3256	1	5.3554	N/A	0	0	N/A	1	4/6/2015	0	3.85	3.85	8.15	0	N/A	In-situ	NOAA Pacific Islands Fisheries Science Center	N/A	% coral mortality calculated as difference in % live coral cover at site in (2010-2015)/(% live coral cover in 2010)*100	Courtney Couch	courtney.s.couch@noaa.gov	AAAA	1	N/A	N/A	N/A	N/A	N/A	-14.175	-169.675	1516	206	10915406	2014-2015	1	0	5.355
AS_X_12	AP	11	Samoas	144	American Samoa	Ofu & Olosega	Ofu & Olosega_Shallow_Forereef	-14.1627	-169.667	13	3	2015	6.4008	1	8.90688	N/A	0	0	N/A	1	4/6/2015	0	3.85	3.85	8.15	0	N/A	In-situ	NOAA Pacific Islands Fisheries Science Center	N/A	% coral mortality calculated as difference in % live coral cover at site in (2010-2015)/(% live coral cover in 2010)*100	Courtney Couch	courtney.s.couch@noaa.gov	AAAA	1	N/A	N/A	N/A	N/A	N/A	-14.175	-169.675	1516	206	10915406	2014-2015	1	0	8.907
AS_X_13	AP	11	Samoas	144	American Samoa	Rose	ROS_INNER_Deep_Lagoon	-14.5425	-168.158	17	3	2015	21.336	0	0	N/A	-1	N/A	N/A	0	4/2/2015	0	3.25	3.25	6.67	0	N/A	In-situ	NOAA Pacific Islands Fisheries Science Center	N/A	N/A	Courtney Couch	courtney.s.couch@noaa.gov	AA	1	N/A	N/A	N/A	N/A	N/A	-14.525	-168.175	1509	236	10865036	2014-2015	0	0	0
AS_X_14	AP	11	Samoas	144	American Samoa	Rose	ROS_INNER_Mid_Backreef	-14.5517	-168.159	17	3	2015	7.62	1	2.20264	N/A	-1	N/A	N/A	0	4/2/2015	0	3.39	3.39	6.82	0	N/A	In-situ	NOAA Pacific Islands Fisheries Science Center	N/A	N/A	Courtney Couch	courtney.s.couch@noaa.gov	AA	1	N/A	N/A	N/A	N/A	N/A	-14.575	-168.175	1508	236	10857836	2014-2015	1	0	2.203
AS_X_15	AP	11	Samoas	144	American Samoa	Rose	ROS_INNER_Mid_Lagoon	-14.5473	-168.163	17	3	2015	17.3736	0	0.358423	N/A	0	0	N/A	1	4/2/2015	0	3.25	3.25	6.67	0	N/A	In-situ	NOAA Pacific Islands Fisheries Science Center	N/A	% coral mortality calculated as difference in % live coral cover at site in (2010-2015)/(% live coral cover in 2010)*100	Courtney Couch	courtney.s.couch@noaa.gov	AAAA	1	N/A	N/A	N/A	N/A	N/A	-14.525	-168.175	1509	236	10865036	2014-2015	1	1	0.358
AS_X_16	AP	11	Samoas	144	American Samoa	Rose	ROS_INNER_Shallow_Backreef	-14.538	-168.152	17	3	2015	1.524	1	2.32558	N/A	0	0	N/A	1	4/2/2015	0	3.25	3.25	6.67	0	N/A	In-situ	NOAA Pacific Islands Fisheries Science Center	N/A	% coral mortality calculated as difference in % live coral cover at site in (2010-2015)/(% live coral cover in 2010)*100	Courtney Couch	courtney.s.couch@noaa.gov	AAAA	1	N/A	N/A	N/A	N/A	N/A	-14.525	-168.175	1509	236	10865036	2014-2015	1	0	2.326
AS_X_17	AP	11	Samoas	144	American Samoa	Rose	ROS_INNER_Shallow_Lagoon	-14.5434	-168.148	19	3	2015	6.096	0	0	N/A	3	99.1576	N/A	1	4/2/2015	0	3.69	3.69	6.61	0	N/A	In-situ	NOAA Pacific Islands Fisheries Science Center	N/A	% coral mortality calculated as difference in % live coral cover at site in (2010-2015)/(% live coral cover in 2010)*100	Courtney Couch	courtney.s.couch@noaa.gov	AAAA	1	N/A	N/A	N/A	N/A	N/A	-14.525	-168.125	1509	237	10865037	2014-2015	0	0	0
AS_X_18	AP	11	Samoas	144	American Samoa	Rose	ROS_SANCTUARY_Deep_Forereef	-14.5363	-168.166	16	3	2015	21.9456	1	0.772201	N/A	0	0	N/A	1	4/2/2015	0	3	3	6.67	0	N/A	In-situ	NOAA Pacific Islands Fisheries Science Center	N/A	% coral mortality calculated as difference in % live coral cover at site in (2010-2015)/(% live coral cover in 2010)*100	Courtney Couch	courtney.s.couch@noaa.gov	AAAA	1	N/A	N/A	N/A	N/A	N/A	-14.525	-168.175	1509	236	10865036	2014-2015	1	0	0.772
AS_X_19	AP	11	Samoas	144	American Samoa	Rose	ROS_SANCTUARY_Mid_Forereef	-14.5407	-168.145	16	3	2015	14.6304	1	2.36686	N/A	0	0	N/A	1	4/2/2015	0	2.99	2.99	6.61	0	N/A	In-situ	NOAA Pacific Islands Fisheries Science Center	N/A	% coral mortality calculated as difference in % live coral cover at site in (2010-2015)/(% live coral cover in 2010)*100	Courtney Couch	courtney.s.couch@noaa.gov	AAAA	1	N/A	N/A	N/A	N/A	N/A	-14.525	-168.125	1509	237	10865037	2014-2015	1	0	2.367
AS_X_2	AP	11	Samoas	144	American Samoa	Tutuila	FAGAA_NO_Shallow_Backreef	-14.2892	-170.681	7	11	2015	0.9144	0	0.250313	N/A	-1	N/A	N/A	0	4/9/2016	0	0	0	3.9	0	N/A	In-situ	NOAA Pacific Islands Fisheries Science Center	N/A	N/A	Courtney Couch	courtney.s.couch@noaa.gov	AA	1	7.03	N/A	N/A	N/A	N/A	-14.275	-170.675	1514	186	10900986	2015-2016	1	1	0.25
AS_X_20	AP	11	Samoas	144	American Samoa	Rose	ROS_SANCTUARY_Shallow_Forereef	-14.5435	-168.143	16	3	2015	6.4008	1	3.74384	N/A	0	0	N/A	1	4/2/2015	0	2.99	2.99	6.61	0	N/A	In-situ	NOAA Pacific Islands Fisheries Science Center	N/A	% coral mortality calculated as difference in % live coral cover at site in (2010-2015)/(% live coral cover in 2010)*100	Courtney Couch	courtney.s.couch@noaa.gov	AAAA	1	N/A	N/A	N/A	N/A	N/A	-14.525	-168.125	1509	237	10865037	2014-2015	1	0	3.744
AS_X_21	AP	11	Samoas	144	American Samoa	Swains	SWA_SANCTUARY_Deep_Forereef	-11.0543	-171.064	15	2	2015	24.0792	2	14.1291	N/A	2	16.4306	N/A	1	3/12/2015	0	1.13	1.13	2.47	0	N/A	In-situ	NOAA Pacific Islands Fisheries Science Center	N/A	% coral mortality calculated as difference in % live coral cover at site in (2010-2015)/(% live coral cover in 2010)*100	Courtney Couch	courtney.s.couch@noaa.gov	AAAA	1	N/A	N/A	N/A	N/A	N/A	-11.075	-171.075	1578	178	11361778	2014-2015	2	0	14.129
AS_X_22	AP	11	Samoas	144	American Samoa	Swains	SWA_SANCTUARY_Mid_Forereef	-11.0502	-171.066	15	2	2015	13.716	1	8.7673	N/A	0	0	N/A	1	3/12/2015	0	1.13	1.13	2.47	0	N/A	In-situ	NOAA Pacific Islands Fisheries Science Center	N/A	% coral mortality calculated as difference in % live coral cover at site in (2010-2015)/(% live coral cover in 2010)*100	Courtney Couch	courtney.s.couch@noaa.gov	AAAA	1	N/A	N/A	N/A	N/A	N/A	-11.075	-171.075	1578	178	11361778	2014-2015	1	0	8.767
AS_X_23	AP	11	Samoas	144	American Samoa	Swains	SWA_SANCTUARY_Shallow_Forereef	-11.0469	-171.069	15	2	2015	5.7912	1	9.44427	N/A	0	0	N/A	1	3/12/2015	0	1.16	1.16	2.51	0	N/A	In-situ	NOAA Pacific Islands Fisheries Science Center	N/A	% coral mortality calculated as difference in % live coral cover at site in (2010-2015)/(% live coral cover in 2010)*100	Courtney Couch	courtney.s.couch@noaa.gov	AAAA	1	N/A	N/A	N/A	N/A	N/A	-11.025	-171.075	1579	178	11368978	2014-2015	1	0	9.444
AS_X_24	AP	11	Samoas	144	American Samoa	Tau	TAU_OPEN_Deep_Forereef	-14.2106	-169.425	15	3	2015	20.7264	0	0	N/A	1	7.17328	N/A	1	4/6/2015	0	3.87	3.87	7.92	0	N/A	In-situ	NOAA Pacific Islands Fisheries Science Center	N/A	% coral mortality calculated as difference in % live coral cover at site in (2010-2015)/(% live coral cover in 2010)*100	Courtney Couch	courtney.s.couch@noaa.gov	AAAA	1	N/A	N/A	N/A	N/A	N/A	-14.225	-169.425	1515	211	10908211	2014-2015	0	0	0
AS_X_25	AP	11	Samoas	144	American Samoa	Tau	TAU_OPEN_Mid_Forereef	-14.2173	-169.418	15	3	2015	15.5448	1	1.36588	N/A	0	0	N/A	1	4/6/2015	0	3.87	3.87	7.92	0	N/A	In-situ	NOAA Pacific Islands Fisheries Science Center	N/A	% coral mortality calculated as difference in % live coral cover at site in (2010-2015)/(% live coral cover in 2010)*100	Courtney Couch	courtney.s.couch@noaa.gov	AAAA	1	N/A	N/A	N/A	N/A	N/A	-14.225	-169.425	1515	211	10908211	2014-2015	1	0	1.366
AS_X_26	AP	11	Samoas	144	American Samoa	Tau	TAU_OPEN_Shallow_Forereef	-14.2153	-169.484	20	3	2015	6.4008	0	0.372671	N/A	0	0	N/A	1	4/6/2015	0	5.08	5.08	8.06	0	N/A	In-situ	NOAA Pacific Islands Fisheries Science Center	N/A	% coral mortality calculated as difference in % live coral cover at site in (2010-2015)/(% live coral cover in 2010)*100	Courtney Couch	courtney.s.couch@noaa.gov	AAAA	1	N/A	N/A	N/A	N/A	N/A	-14.225	-169.475	1515	210	10908210	2014-2015	1	1	0.373
AS_X_27	AP	11	Samoas	144	American Samoa	Tau	TAU_SANCTUARY_Deep_Forereef	-14.2643	-169.5	24	3	2015	22.5552	1	0.670391	N/A	2	12.0584	N/A	1	4/6/2015	0	5.81	5.81	7.94	0	N/A	In-situ	NOAA Pacific Islands Fisheries Science Center	N/A	% coral mortality calculated as difference in % live coral cover at site in (2010-2015)/(% live coral cover in 2010)*100	Courtney Couch	courtney.s.couch@noaa.gov	AAAA	1	N/A	N/A	N/A	N/A	N/A	-14.275	-169.475	1514	210	10901010	2014-2015	1	0	0.67
AS_X_28	AP	11	Samoas	144	American Samoa	Tau	TAU_SANCTUARY_Mid_Forereef	-14.267	-169.497	24	3	2015	15.24	0	0	N/A	0	0	N/A	1	4/6/2015	0	5.81	5.81	7.94	0	N/A	In-situ	NOAA Pacific Islands Fisheries Science Center	N/A	% coral mortality calculated as difference in % live coral cover at site in (2010-2015)/(% live coral cover in 2010)*100	Courtney Couch	courtney.s.couch@noaa.gov	AAAA	1	N/A	N/A	N/A	N/A	N/A	-14.275	-169.475	1514	210	10901010	2014-2015	0	0	0
AS_X_29	AP	11	Samoas	144	American Samoa	Tau	TAU_SANCTUARY_Shallow_Forereef	-14.2749	-169.493	23	3	2015	7.0104	1	1.41093	N/A	-1	N/A	N/A	0	4/6/2015	0	5.61	5.61	7.94	0	N/A	In-situ	NOAA Pacific Islands Fisheries Science Center	N/A	N/A	Courtney Couch	courtney.s.couch@noaa.gov	AA	1	N/A	N/A	N/A	N/A	N/A	-14.275	-169.475	1514	210	10901010	2014-2015	1	0	1.411
AS_X_3	AP	11	Samoas	144	American Samoa	Tutuila	FAGAA_NO_Shallow_Forereef	-14.287	-170.674	9	11	2015	6.4008	1	0.674157	N/A	-1	N/A	N/A	0	4/9/2016	0	0	0	3.9	0	N/A	In-situ	NOAA Pacific Islands Fisheries Science Center	N/A	N/A	Courtney Couch	courtney.s.couch@noaa.gov	AA	1	7.03	N/A	N/A	N/A	N/A	-14.275	-170.675	1514	186	10900986	2015-2016	1	0	0.674
AS_X_30	AP	11	Samoas	144	American Samoa	Tutuila	TUT_FAGATELE_Deep_Forereef	-14.3668	-170.763	17	2	2015	20.4216	1	2.42131	N/A	-1	N/A	N/A	0	4/3/2015	0	2.8	2.8	7.5	0	N/A	In-situ	NOAA Pacific Islands Fisheries Science Center	N/A	N/A	Courtney Couch	courtney.s.couch@noaa.gov	AA	1	N/A	N/A	N/A	N/A	N/A	-14.375	-170.775	1512	184	10886584	2014-2015	1	0	2.421
AS_X_31	AP	11	Samoas	144	American Samoa	Tutuila	TUT_FAGATELE_Mid_Forereef	-14.3633	-170.768	17	2	2015	16.764	1	5.36913	N/A	-1	N/A	N/A	0	4/3/2015	0	2.8	2.8	7.5	0	N/A	In-situ	NOAA Pacific Islands Fisheries Science Center	N/A	N/A	Courtney Couch	courtney.s.couch@noaa.gov	AA	1	N/A	N/A	N/A	N/A	N/A	-14.375	-170.775	1512	184	10886584	2014-2015	1	0	5.369
AS_X_32	AP	11	Samoas	144	American Samoa	Tutuila	TUT_FAGATELE_Shallow_Forereef	-14.3636	-170.762	17	2	2015	5.7912	1	5.91004	N/A	-1	N/A	N/A	0	4/3/2015	0	2.8	2.8	7.5	0	N/A	In-situ	NOAA Pacific Islands Fisheries Science Center	N/A	N/A	Courtney Couch	courtney.s.couch@noaa.gov	AA	1	N/A	N/A	N/A	N/A	N/A	-14.375	-170.775	1512	184	10886584	2014-2015	1	0	5.91
AS_X_33	AP	11	Samoas	144	American Samoa	Tutuila	Tutuila_Deep_Forereef	-14.2513	-170.651	27	2	2015	23.4696	1	4.30844	N/A	2	40.1643	N/A	1	4/3/2015	0	4.05	4.05	7.03	0	N/A	In-situ	NOAA Pacific Islands Fisheries Science Center	N/A	% coral mortality calculated as difference in % live coral cover at site in (2010-2015)/(% live coral cover in 2010)*100	Courtney Couch	courtney.s.couch@noaa.gov	AAAA	1	N/A	N/A	N/A	N/A	N/A	-14.275	-170.675	1514	186	10900986	2014-2015	1	0	4.308
AS_X_34	AP	11	Samoas	144	American Samoa	Tutuila	Tutuila_Mid_Forereef	-14.3422	-170.72	26	2	2015	14.9352	1	7.88138	N/A	1	9.97594	N/A	1	4/3/2015	0	3.74	3.74	6.89	0	N/A	In-situ	NOAA Pacific Islands Fisheries Science Center	N/A	% coral mortality calculated as difference in % live coral cover at site in (2010-2015)/(% live coral cover in 2010)*100	Courtney Couch	courtney.s.couch@noaa.gov	AAAA	1	N/A	N/A	N/A	N/A	N/A	-14.325	-170.725	1513	185	10893785	2014-2015	1	0	7.881
AS_X_35	AP	11	Samoas	144	American Samoa	Tutuila	Tutuila_Shallow_Forereef	-14.3482	-170.727	26	2	2015	5.4864	2	11.6273	N/A	2	21.2394	N/A	1	4/3/2015	0	3.74	3.74	6.89	0	N/A	In-situ	NOAA Pacific Islands Fisheries Science Center	N/A	% coral mortality calculated as difference in % live coral cover at site in (2010-2015)/(% live coral cover in 2010)*100	Courtney Couch	courtney.s.couch@noaa.gov	AAAA	1	N/A	N/A	N/A	N/A	N/A	-14.325	-170.725	1513	185	10893785	2014-2015	2	0	11.627
AS_X_36	AP	11	Samoas	144	American Samoa	Rose	ROS_SANCTUARY_Deep_Forereef	-14.534	-168.16	1	5	2016	22.86	2	11.0612	N/A	-1	N/A	N/A	0	4/11/2016	2	4.42	4.42	4.42	0	20	In-situ	NOAA Pacific Islands Fisheries Science Center	N/A	N/A	Courtney Couch	courtney.s.couch@noaa.gov	AA	1	6.67	N/A	N/A	N/A	N/A	-14.525	-168.175	1509	236	10865036	2015-2016	2	0	11.061
AS_X_37	AP	11	Samoas	144	American Samoa	Rose	ROS_SANCTUARY_Mid_Forereef	-14.5376	-168.171	1	5	2016	13.716	2	14.4991	N/A	-1	N/A	N/A	0	4/11/2016	2	4.42	4.42	4.42	0	20	In-situ	NOAA Pacific Islands Fisheries Science Center	N/A	N/A	Courtney Couch	courtney.s.couch@noaa.gov	AA	1	6.67	N/A	N/A	N/A	N/A	-14.525	-168.175	1509	236	10865036	2015-2016	2	0	14.499
AS_X_38	AP	11	Samoas	144	American Samoa	Rose	ROS_SANCTUARY_Shallow_Forereef	-14.5317	-168.156	1	5	2016	4.8768	2	12.0427	N/A	-1	N/A	N/A	0	4/11/2016	2	4.42	4.42	4.42	0	20	In-situ	NOAA Pacific Islands Fisheries Science Center	N/A	N/A	Courtney Couch	courtney.s.couch@noaa.gov	AA	1	6.67	N/A	N/A	N/A	N/A	-14.525	-168.175	1509	236	10865036	2015-2016	2	0	12.043
AS_X_4	AP	11	Samoas	144	American Samoa	Tutuila	FAGAA_SO_Mid_Forereef	-14.2937	-170.675	29	10	2015	14.0208	1	0.680272	N/A	-1	N/A	N/A	0	4/9/2016	0	0	0	3.9	0	N/A	In-situ	NOAA Pacific Islands Fisheries Science Center	N/A	N/A	Courtney Couch	courtney.s.couch@noaa.gov	AA	1	7.03	N/A	N/A	N/A	N/A	-14.275	-170.675	1514	186	10900986	2015-2016	1	0	0.68
AS_X_5	AP	11	Samoas	144	American Samoa	Tutuila	FAGAA_SO_Shallow_Backreef	-14.2919	-170.681	31	10	2015	1.8288	0	0.174368	N/A	-1	N/A	N/A	0	4/9/2016	0	0	0	3.9	0	N/A	In-situ	NOAA Pacific Islands Fisheries Science Center	N/A	N/A	Courtney Couch	courtney.s.couch@noaa.gov	AA	1	7.03	N/A	N/A	N/A	N/A	-14.275	-170.675	1514	186	10900986	2015-2016	1	1	0.174
AS_X_6	AP	11	Samoas	144	American Samoa	Tutuila	FAGAA_SO_Shallow_Forereef	-14.2928	-170.675	29	10	2015	6.7056	0	0.234329	N/A	-1	N/A	N/A	0	4/9/2016	0	0	0	3.9	0	N/A	In-situ	NOAA Pacific Islands Fisheries Science Center	N/A	N/A	Courtney Couch	courtney.s.couch@noaa.gov	AA	1	7.03	N/A	N/A	N/A	N/A	-14.275	-170.675	1514	186	10900986	2015-2016	1	1	0.234
AS_X_7	AP	11	Samoas	144	American Samoa	Tutuila	FAGAM_Deep_Forereef	-14.2916	-170.806	27	10	2015	21.6408	1	0.738007	N/A	-1	N/A	N/A	0	4/9/2016	0	0	0	4.45	0	N/A	In-situ	NOAA Pacific Islands Fisheries Science Center	N/A	N/A	Courtney Couch	courtney.s.couch@noaa.gov	AA	1	8.33	N/A	N/A	N/A	N/A	-14.275	-170.825	1514	183	10900983	2015-2016	1	0	0.738
AS_X_8	AP	11	Samoas	144	American Samoa	Tutuila	FAGAM_Mid_Forereef	-14.2913	-170.804	26	10	2015	13.716	1	1.05495	N/A	-1	N/A	N/A	0	4/9/2016	0	0	0	4.45	0	N/A	In-situ	NOAA Pacific Islands Fisheries Science Center	N/A	N/A	Courtney Couch	courtney.s.couch@noaa.gov	AA	1	8.33	N/A	N/A	N/A	N/A	-14.275	-170.825	1514	183	10900983	2015-2016	1	0	1.055
AS_X_9	AP	11	Samoas	144	American Samoa	Tutuila	FAGAM_Shallow_Forereef	-14.2923	-170.804	26	10	2015	6.4008	1	0.543478	N/A	-1	N/A	N/A	0	4/9/2016	0	0	0	4.45	0	N/A	In-situ	NOAA Pacific Islands Fisheries Science Center	N/A	N/A	Courtney Couch	courtney.s.couch@noaa.gov	AA	1	8.33	N/A	N/A	N/A	N/A	-14.275	-170.825	1514	183	10900983	2015-2016	1	0	0.543
AU_1000	AP	16	Northern GBR	53	Australia	Great Barrier Reef	Pethebridge Islets Reef (East), 14-122a	-14.7314	145.101	23	3	2016	N/A	3	>60	80.5	-1	N/A	N/A	0	3/26/2016	0	7.61	7.61	8.1	0	N/A	Aerial survey	Terry Hughes	Hughes, T. P., J. T. Kerry, and T. Simpson. 2018. Large-scale bleaching of corals on the Great Barrier Reef. Ecology 99:1307	N/A	Terry Hughes	terry.hughes@jcu.edu.au	AA	1	1.88	N/A	N/A	N/A	N/A	-14.725	145.125	1505	6502	10842502	2015-2016	3	0	80.5
AU_1001	AP	16	Northern GBR	53	Australia	Great Barrier Reef	Pethebridge Islets Reef (West), 14-122b	-14.7362	145.083	23	3	2016	N/A	3	>60	80.5	-1	N/A	N/A	0	3/26/2016	0	8.04	8.04	8.53	0	N/A	Aerial survey	Terry Hughes	Hughes, T. P., J. T. Kerry, and T. Simpson. 2018. Large-scale bleaching of corals on the Great Barrier Reef. Ecology 99:1308	N/A	Terry Hughes	terry.hughes@jcu.edu.au	AA	1	2.19	N/A	N/A	N/A	N/A	-14.725	145.075	1505	6501	10842501	2015-2016	3	0	80.5
AU_1002	AP	16	Northern GBR	53	Australia	Great Barrier Reef	Martin Reef, 14-123	-14.7631	145.356	23	3	2016	N/A	3	>60	80.5	-1	N/A	N/A	0	3/30/2016	0	7.07	7.07	7.87	0	N/A	Aerial survey	Terry Hughes	Hughes, T. P., J. T. Kerry, and T. Simpson. 2018. Large-scale bleaching of corals on the Great Barrier Reef. Ecology 99:1309	N/A	Terry Hughes	terry.hughes@jcu.edu.au	AA	1	1.72	N/A	N/A	N/A	N/A	-14.775	145.375	1504	6507	10835307	2015-2016	3	0	80.5
AU_1003	AP	16	Northern GBR	53	Australia	Great Barrier Reef	Maxwell Reef, 14-125	-14.7867	145.316	23	3	2016	N/A	3	>60	80.5	-1	N/A	N/A	0	3/26/2016	0	7.26	7.26	7.76	0	N/A	Aerial survey	Terry Hughes	Hughes, T. P., J. T. Kerry, and T. Simpson. 2018. Large-scale bleaching of corals on the Great Barrier Reef. Ecology 99:1310	N/A	Terry Hughes	terry.hughes@jcu.edu.au	AA	1	1.59	N/A	N/A	N/A	N/A	-14.775	145.325	1504	6506	10835306	2015-2016	3	0	80.5
AU_1004	AP	16	Northern GBR	53	Australia	Great Barrier Reef	Linnet Reef, 14-126	-14.7867	145.344	23	3	2016	N/A	3	>60	80.5	-1	N/A	N/A	0	3/26/2016	0	7.26	7.26	7.76	0	N/A	Aerial survey	Terry Hughes	Hughes, T. P., J. T. Kerry, and T. Simpson. 2018. Large-scale bleaching of corals on the Great Barrier Reef. Ecology 99:1311	N/A	Terry Hughes	terry.hughes@jcu.edu.au	AA	1	1.59	N/A	N/A	N/A	N/A	-14.775	145.325	1504	6506	10835306	2015-2016	3	0	80.5
AU_1005	AP	16	Northern GBR	53	Australia	Great Barrier Reef	Rocky Islets Reef, 14-132a	-14.855	145.48	23	3	2016	N/A	3	>60	80.5	-1	N/A	N/A	0	3/30/2016	0	7.13	7.13	7.93	0	N/A	Aerial survey	Terry Hughes	Hughes, T. P., J. T. Kerry, and T. Simpson. 2018. Large-scale bleaching of corals on the Great Barrier Reef. Ecology 99:1312	N/A	Terry Hughes	terry.hughes@jcu.edu.au	AA	1	1.58	N/A	N/A	N/A	N/A	-14.875	145.475	1502	6509	10820909	2015-2016	3	0	80.5
AU_1006	AP	16	Northern GBR	53	Australia	Great Barrier Reef	U/N Reef, 14-150	-14.8831	145.557	23	3	2016	N/A	3	>60	80.5	-1	N/A	N/A	0	3/30/2016	0	7.64	7.64	8.64	0	N/A	Aerial survey	Terry Hughes	Hughes, T. P., J. T. Kerry, and T. Simpson. 2018. Large-scale bleaching of corals on the Great Barrier Reef. Ecology 99:1313	N/A	Terry Hughes	terry.hughes@jcu.edu.au	AA	1	1.71	N/A	N/A	N/A	N/A	-14.875	145.575	1502	6511	10820911	2015-2016	3	0	80.5
AU_1007	AP	16	Northern GBR	53	Australia	Great Barrier Reef	Two Islands Reef, 15-002	-15.0228	145.442	23	3	2016	N/A	3	>60	80.5	-1	N/A	N/A	0	3/24/2016	0	5.52	5.52	5.68	0	N/A	Aerial survey	Terry Hughes	Hughes, T. P., J. T. Kerry, and T. Simpson. 2018. Large-scale bleaching of corals on the Great Barrier Reef. Ecology 99:1314	N/A	Terry Hughes	terry.hughes@jcu.edu.au	AA	1	1.32	N/A	N/A	N/A	N/A	-15.025	145.425	1499	6508	10799308	2015-2016	3	0	80.5
AU_1008	AP	16	Northern GBR	53	Australia	Great Barrier Reef	Low Wooded Reef, 15-003	-15.0935	145.38	23	3	2016	N/A	2	30-60	45	-1	N/A	N/A	0	3/24/2016	0	5.27	5.27	5.41	0	N/A	Aerial survey	Terry Hughes	Hughes, T. P., J. T. Kerry, and T. Simpson. 2018. Large-scale bleaching of corals on the Great Barrier Reef. Ecology 99:1315	N/A	Terry Hughes	terry.hughes@jcu.edu.au	AA	1	1.12	N/A	N/A	N/A	N/A	-15.075	145.375	1498	6507	10792107	2015-2016	2	0	45
AU_1009	AP	16	Northern GBR	53	Australia	Great Barrier Reef	Three Islands Reef, 15-005	-15.1152	145.422	23	3	2016	N/A	2	30-60	45	-1	N/A	N/A	0	3/23/2016	1	4.53	4.53	4.53	0	N/A	Aerial survey	Terry Hughes	Hughes, T. P., J. T. Kerry, and T. Simpson. 2018. Large-scale bleaching of corals on the Great Barrier Reef. Ecology 99:1316	N/A	Terry Hughes	terry.hughes@jcu.edu.au	AA	1	0.94	N/A	N/A	N/A	N/A	-15.125	145.425	1497	6508	10784908	2015-2016	2	0	45
AU_1010	AP	16	Northern GBR	53	Australia	Great Barrier Reef	Forrester Reef, 15-009	-15.1667	145.496	23	3	2016	N/A	2	30-60	45	-1	N/A	N/A	0	3/23/2016	1	4.43	4.43	4.43	0	N/A	Aerial survey	Terry Hughes	Hughes, T. P., J. T. Kerry, and T. Simpson. 2018. Large-scale bleaching of corals on the Great Barrier Reef. Ecology 99:1317	N/A	Terry Hughes	terry.hughes@jcu.edu.au	AA	1	1.06	N/A	N/A	N/A	N/A	-15.175	145.475	1496	6509	10777709	2015-2016	2	0	45
AU_1011	AP	16	Northern GBR	53	Australia	Great Barrier Reef	Boulder Reef, 15-012	-15.4139	145.431	23	3	2016	N/A	2	30-60	45	-1	N/A	N/A	0	3/3/2016	2	3.46	3.46	3.46	0	20	Aerial survey	Terry Hughes	Hughes, T. P., J. T. Kerry, and T. Simpson. 2018. Large-scale bleaching of corals on the Great Barrier Reef. Ecology 99:1318	N/A	Terry Hughes	terry.hughes@jcu.edu.au	AA	1	1.38	N/A	N/A	N/A	N/A	-15.425	145.425	1491	6508	10741708	2015-2016	2	0	45
AU_1012	AP	16	Northern GBR	53	Australia	Great Barrier Reef	Egret Reef, 15-013	-15.4741	145.417	23	3	2016	N/A	3	>60	80.5	-1	N/A	N/A	0	3/3/2016	2	3.16	3.16	3.16	0	20	Aerial survey	Terry Hughes	Hughes, T. P., J. T. Kerry, and T. Simpson. 2018. Large-scale bleaching of corals on the Great Barrier Reef. Ecology 99:1319	N/A	Terry Hughes	terry.hughes@jcu.edu.au	AA	1	1.23	N/A	N/A	N/A	N/A	-15.475	145.425	1490	6508	10734508	2015-2016	3	0	80.5
AU_1013	AP	16	Northern GBR	53	Australia	Great Barrier Reef	Cowlishaw Reef, 15-052	-15.5347	145.353	23	3	2016	N/A	3	>60	80.5	-1	N/A	N/A	0	3/3/2016	2	3.3	3.3	3.3	0	20	Aerial survey	Terry Hughes	Hughes, T. P., J. T. Kerry, and T. Simpson. 2018. Large-scale bleaching of corals on the Great Barrier Reef. Ecology 99:1320	N/A	Terry Hughes	terry.hughes@jcu.edu.au	AA	1	0.75	N/A	N/A	N/A	N/A	-15.525	145.375	1489	6507	10727307	2015-2016	3	0	80.5
AU_1014	AP	16	Northern GBR	53	Australia	Great Barrier Reef	Rocky Island Reef, 15-054	-15.6016	145.329	23	3	2016	N/A	3	>60	80.5	-1	N/A	N/A	0	3/3/2016	2	3.2	3.2	3.2	0	20	Aerial survey	Terry Hughes	Hughes, T. P., J. T. Kerry, and T. Simpson. 2018. Large-scale bleaching of corals on the Great Barrier Reef. Ecology 99:1321	N/A	Terry Hughes	terry.hughes@jcu.edu.au	AA	1	0.15	N/A	N/A	N/A	N/A	-15.625	145.325	1487	6506	10712906	2015-2016	3	0	80.5
AU_1015	AP	16	Northern GBR	53	Australia	Great Barrier Reef	U/N Reef, 15-055	-15.6127	145.319	23	3	2016	N/A	2	30-60	45	-1	N/A	N/A	0	3/3/2016	2	3.2	3.2	3.2	0	20	Aerial survey	Terry Hughes	Hughes, T. P., J. T. Kerry, and T. Simpson. 2018. Large-scale bleaching of corals on the Great Barrier Reef. Ecology 99:1322	N/A	Terry Hughes	terry.hughes@jcu.edu.au	AA	1	0.15	N/A	N/A	N/A	N/A	-15.625	145.325	1487	6506	10712906	2015-2016	2	0	45
AU_1016	AP	16	Northern GBR	53	Australia	Great Barrier Reef	U/N Reef, 15-058	-15.6445	145.319	23	3	2016	N/A	3	>60	80.5	-1	N/A	N/A	0	3/3/2016	2	3.2	3.2	3.2	0	20	Aerial survey	Terry Hughes	Hughes, T. P., J. T. Kerry, and T. Simpson. 2018. Large-scale bleaching of corals on the Great Barrier Reef. Ecology 99:1323	N/A	Terry Hughes	terry.hughes@jcu.edu.au	AA	1	0.15	N/A	N/A	N/A	N/A	-15.625	145.325	1487	6506	10712906	2015-2016	3	0	80.5
AU_1017	AP	16	Northern GBR	53	Australia	Great Barrier Reef	U/N Reef, 15-059a	-15.7054	145.354	23	3	2016	N/A	2	30-60	45	-1	N/A	N/A	0	3/3/2016	2	3.2	3.2	3.2	0	20	Aerial survey	Terry Hughes	Hughes, T. P., J. T. Kerry, and T. Simpson. 2018. Large-scale bleaching of corals on the Great Barrier Reef. Ecology 99:1324	N/A	Terry Hughes	terry.hughes@jcu.edu.au	AA	1	0.32	N/A	N/A	N/A	N/A	-15.725	145.375	1485	6507	10698507	2015-2016	2	0	45
AU_1018	AP	16	Northern GBR	53	Australia	Great Barrier Reef	Gubbins Reef, 15-063	-15.7095	145.395	23	3	2016	N/A	3	>60	80.5	-1	N/A	N/A	0	3/3/2016	2	3.2	3.2	3.2	0	20	Aerial survey	Terry Hughes	Hughes, T. P., J. T. Kerry, and T. Simpson. 2018. Large-scale bleaching of corals on the Great Barrier Reef. Ecology 99:1325	N/A	Terry Hughes	terry.hughes@jcu.edu.au	AA	1	0.32	N/A	N/A	N/A	N/A	-15.725	145.375	1485	6507	10698507	2015-2016	3	0	80.5
AU_1019	AP	16	Northern GBR	53	Australia	Great Barrier Reef	Hope Islands Reef (West), 15-064	-15.7387	145.44	23	3	2016	N/A	3	>60	80.5	-1	N/A	N/A	0	3/3/2016	2	3.04	3.04	3.04	0	20	Aerial survey	Terry Hughes	Hughes, T. P., J. T. Kerry, and T. Simpson. 2018. Large-scale bleaching of corals on the Great Barrier Reef. Ecology 99:1326	N/A	Terry Hughes	terry.hughes@jcu.edu.au	AA	1	0.33	N/A	N/A	N/A	N/A	-15.725	145.425	1485	6508	10698508	2015-2016	3	0	80.5
AU_1020	AP	16	Northern GBR	53	Australia	Great Barrier Reef	Hope Islands Reef (East), 15-065	-15.733	145.458	23	3	2016	N/A	3	>60	80.5	-1	N/A	N/A	0	3/3/2016	2	3.02	3.02	3.02	0	20	Aerial survey	Terry Hughes	Hughes, T. P., J. T. Kerry, and T. Simpson. 2018. Large-scale bleaching of corals on the Great Barrier Reef. Ecology 99:1327	N/A	Terry Hughes	terry.hughes@jcu.edu.au	AA	1	0.49	N/A	N/A	N/A	N/A	-15.725	145.475	1485	6509	10698509	2015-2016	3	0	80.5
AU_1021	AP	16	Northern GBR	53	Australia	Great Barrier Reef	U/N Reef, 15-066	-15.9401	145.4	23	3	2016	N/A	2	10-30	20	-1	N/A	N/A	0	3/2/2016	2	2.62	2.62	2.62	0	21	Aerial survey	Terry Hughes	Hughes, T. P., J. T. Kerry, and T. Simpson. 2018. Large-scale bleaching of corals on the Great Barrier Reef. Ecology 99:1328	N/A	Terry Hughes	terry.hughes@jcu.edu.au	AA	1	0.66	N/A	N/A	N/A	N/A	-15.925	145.425	1481	6508	10669708	2015-2016	2	0	20
AU_1022	AP	16	Southern GBR	54	Australia	Great Barrier Reef	One Tree Island Reef, 23-055a	-23.4957	152.061	23	3	2016	N/A	1	1-10	5.5	-1	N/A	N/A	0	6/1/2015	2	0	0	0	0	415	Aerial survey	Terry Hughes	Hughes, T. P., J. T. Kerry, and T. Simpson. 2018. Large-scale bleaching of corals on the Great Barrier Reef. Ecology 99:1329	N/A	Terry Hughes	terry.hughes@jcu.edu.au	AA	1	1.37	N/A	N/A	N/A	N/A	-23.475	152.075	1330	6641	9582641	2015-2016	1	0	5.5
AU_1023	AP	16	Torres Strait	187	Australia	Great Barrier Reef	Wapa Reef, 09-355	-9.48102	143.13	24	3	2016	N/A	3	>60	80.5	-1	N/A	N/A	0	4/10/2016	0	6.68	6.68	9.19	0	N/A	Aerial survey	Terry Hughes	Hughes, T. P., J. T. Kerry, and T. Simpson. 2018. Large-scale bleaching of corals on the Great Barrier Reef. Ecology 99:1330	N/A	Terry Hughes	terry.hughes@jcu.edu.au	AA	1	1.12	N/A	N/A	N/A	N/A	-9.475	143.125	1610	6462	11598462	2015-2016	3	0	80.5
AU_1024	AP	16	Torres Strait	187	Australia	Great Barrier Reef	U/N Reef, 09-356	-9.55206	143.154	24	3	2016	N/A	3	>60	80.5	-1	N/A	N/A	0	4/10/2016	0	6.75	6.75	9.34	0	N/A	Aerial survey	Terry Hughes	Hughes, T. P., J. T. Kerry, and T. Simpson. 2018. Large-scale bleaching of corals on the Great Barrier Reef. Ecology 99:1331	N/A	Terry Hughes	terry.hughes@jcu.edu.au	AA	1	0.76	N/A	N/A	N/A	N/A	-9.575	143.175	1608	6463	11584063	2015-2016	3	0	80.5
AU_1025	AP	16	Torres Strait	187	Australia	Great Barrier Reef	Mutacomai and Dagagota Reefs, 09-357	-9.28573	143.198	24	3	2016	N/A	3	>60	80.5	-1	N/A	N/A	0	4/10/2016	0	6.34	6.34	8.54	0	N/A	Aerial survey	Terry Hughes	Hughes, T. P., J. T. Kerry, and T. Simpson. 2018. Large-scale bleaching of corals on the Great Barrier Reef. Ecology 99:1332	N/A	Terry Hughes	terry.hughes@jcu.edu.au	AA	1	0.8	N/A	N/A	N/A	N/A	-9.275	143.175	1614	6463	11627263	2015-2016	3	0	80.5
AU_1026	AP	16	Torres Strait	187	Australia	Great Barrier Reef	Kokope Reef, 09-358a	-9.35526	143.196	24	3	2016	N/A	3	>60	80.5	-1	N/A	N/A	0	4/10/2016	0	6.51	6.51	8.75	0	N/A	Aerial survey	Terry Hughes	Hughes, T. P., J. T. Kerry, and T. Simpson. 2018. Large-scale bleaching of corals on the Great Barrier Reef. Ecology 99:1333	N/A	Terry Hughes	terry.hughes@jcu.edu.au	AA	1	0.97	N/A	N/A	N/A	N/A	-9.375	143.175	1612	6463	11612863	2015-2016	3	0	80.5
AU_1027	AP	16	Torres Strait	187	Australia	Great Barrier Reef	U/N Reef, 09-366	-9.34145	143.313	24	3	2016	N/A	2	30-60	45	-1	N/A	N/A	0	4/11/2016	0	6.42	6.42	8.96	0	N/A	Aerial survey	Terry Hughes	Hughes, T. P., J. T. Kerry, and T. Simpson. 2018. Large-scale bleaching of corals on the Great Barrier Reef. Ecology 99:1334	N/A	Terry Hughes	terry.hughes@jcu.edu.au	AA	1	0.82	N/A	N/A	N/A	N/A	-9.325	143.325	1613	6466	11620066	2015-2016	2	0	45
AU_1028	AP	16	Torres Strait	187	Australia	Great Barrier Reef	U/N Reef, 09-368	-9.35515	143.349	24	3	2016	N/A	2	30-60	45	-1	N/A	N/A	0	4/11/2016	0	6.26	6.26	8.81	0	N/A	Aerial survey	Terry Hughes	Hughes, T. P., J. T. Kerry, and T. Simpson. 2018. Large-scale bleaching of corals on the Great Barrier Reef. Ecology 99:1335	N/A	Terry Hughes	terry.hughes@jcu.edu.au	AA	1	0.67	N/A	N/A	N/A	N/A	-9.375	143.325	1612	6466	11612866	2015-2016	2	0	45
AU_1029	AP	16	Torres Strait	187	Australia	Great Barrier Reef	Zagai Island, 09-372	-9.85416	142.932	24	3	2016	N/A	3	>60	80.5	-1	N/A	N/A	0	4/9/2016	0	7.06	7.06	8.91	0	N/A	Aerial survey	Terry Hughes	Hughes, T. P., J. T. Kerry, and T. Simpson. 2018. Large-scale bleaching of corals on the Great Barrier Reef. Ecology 99:1336	N/A	Terry Hughes	terry.hughes@jcu.edu.au	AA	1	0.44	N/A	N/A	N/A	N/A	-9.875	142.925	1602	6458	11540858	2015-2016	3	0	80.5
AU_1030	AP	16	Torres Strait	187	Australia	Great Barrier Reef	Dungeness (Jeaka) Reef, 09-376	-9.88407	142.936	24	3	2016	N/A	3	>60	80.5	-1	N/A	N/A	0	4/9/2016	0	7.06	7.06	8.91	0	N/A	Aerial survey	Terry Hughes	Hughes, T. P., J. T. Kerry, and T. Simpson. 2018. Large-scale bleaching of corals on the Great Barrier Reef. Ecology 99:1337	N/A	Terry Hughes	terry.hughes@jcu.edu.au	AA	1	0.44	N/A	N/A	N/A	N/A	-9.875	142.925	1602	6458	11540858	2015-2016	3	0	80.5
AU_1031	AP	16	Torres Strait	187	Australia	Great Barrier Reef	Dungeness (Jeaka) Reef, 09-376	-9.93999	142.986	24	3	2016	N/A	3	>60	80.5	-1	N/A	N/A	0	4/9/2016	0	7.04	7.04	8.94	0	N/A	Aerial survey	Terry Hughes	Hughes, T. P., J. T. Kerry, and T. Simpson. 2018. Large-scale bleaching of corals on the Great Barrier Reef. Ecology 99:1338	N/A	Terry Hughes	terry.hughes@jcu.edu.au	AA	1	N/A	N/A	N/A	N/A	N/A	-9.925	142.975	1601	6459	11533659	2015-2016	3	0	80.5
AU_1032	AP	16	Torres Strait	187	Australia	Great Barrier Reef	Tudu Island, 09-378	-9.80334	142.972	24	3	2016	N/A	3	>60	80.5	-1	N/A	N/A	0	4/9/2016	0	7.03	7.03	8.94	0	N/A	Aerial survey	Terry Hughes	Hughes, T. P., J. T. Kerry, and T. Simpson. 2018. Large-scale bleaching of corals on the Great Barrier Reef. Ecology 99:1339	N/A	Terry Hughes	terry.hughes@jcu.edu.au	AA	1	0.15	N/A	N/A	N/A	N/A	-9.825	142.975	1603	6459	11548059	2015-2016	3	0	80.5
AU_1033	AP	16	Torres Strait	187	Australia	Great Barrier Reef	Warrior Reef, 09-394	-9.69028	143.093	24	3	2016	N/A	3	>60	80.5	-1	N/A	N/A	0	4/10/2016	0	6.96	6.96	9.18	0	N/A	Aerial survey	Terry Hughes	Hughes, T. P., J. T. Kerry, and T. Simpson. 2018. Large-scale bleaching of corals on the Great Barrier Reef. Ecology 99:1340	N/A	Terry Hughes	terry.hughes@jcu.edu.au	AA	1	0.6	N/A	N/A	N/A	N/A	-9.675	143.075	1606	6461	11569661	2015-2016	3	0	80.5
AU_1034	AP	16	Torres Strait	187	Australia	Great Barrier Reef	Mimi Islet, 09-406	-9.9545	143.398	24	3	2016	N/A	2	10-30	20	-1	N/A	N/A	0	4/2/2016	0	4.85	4.85	6.05	0	N/A	Aerial survey	Terry Hughes	Hughes, T. P., J. T. Kerry, and T. Simpson. 2018. Large-scale bleaching of corals on the Great Barrier Reef. Ecology 99:1341	N/A	Terry Hughes	terry.hughes@jcu.edu.au	AA	1	0.18	N/A	N/A	N/A	N/A	-9.975	143.375	1600	6467	11526467	2015-2016	2	0	20
AU_1035	AP	16	Torres Strait	187	Australia	Great Barrier Reef	Aukane Islet, 09-407	-9.86982	143.393	24	3	2016	N/A	2	30-60	45	-1	N/A	N/A	0	4/5/2016	0	4.87	4.87	6.21	0	N/A	Aerial survey	Terry Hughes	Hughes, T. P., J. T. Kerry, and T. Simpson. 2018. Large-scale bleaching of corals on the Great Barrier Reef. Ecology 99:1342	N/A	Terry Hughes	terry.hughes@jcu.edu.au	AA	1	0.18	N/A	N/A	N/A	N/A	-9.875	143.375	1602	6467	11540867	2015-2016	2	0	45
AU_1036	AP	16	Torres Strait	187	Australia	Great Barrier Reef	Kabbikane Islet, 09-408	-9.82147	143.408	24	3	2016	N/A	2	10-30	20	-1	N/A	N/A	0	4/4/2016	0	4.47	4.47	5.51	0	N/A	Aerial survey	Terry Hughes	Hughes, T. P., J. T. Kerry, and T. Simpson. 2018. Large-scale bleaching of corals on the Great Barrier Reef. Ecology 99:1343	N/A	Terry Hughes	terry.hughes@jcu.edu.au	AA	1	0.16	N/A	N/A	N/A	N/A	-9.825	143.425	1603	6468	11548068	2015-2016	2	0	20
AU_1037	AP	16	Torres Strait	187	Australia	Great Barrier Reef	Masig Island, 09-409	-9.75192	143.409	24	3	2016	N/A	2	10-30	20	-1	N/A	N/A	0	4/5/2016	0	4.31	4.31	5.49	0	N/A	Aerial survey	Terry Hughes	Hughes, T. P., J. T. Kerry, and T. Simpson. 2018. Large-scale bleaching of corals on the Great Barrier Reef. Ecology 99:1344	N/A	Terry Hughes	terry.hughes@jcu.edu.au	AA	1	0.15	N/A	N/A	N/A	N/A	-9.775	143.425	1604	6468	11555268	2015-2016	2	0	20
AU_1038	AP	16	Torres Strait	187	Australia	Great Barrier Reef	Keats (Pentrick) Island, 09-410	-9.68779	143.431	24	3	2016	N/A	2	30-60	45	-1	N/A	N/A	0	4/10/2016	0	4.36	4.36	6.05	0	N/A	Aerial survey	Terry Hughes	Hughes, T. P., J. T. Kerry, and T. Simpson. 2018. Large-scale bleaching of corals on the Great Barrier Reef. Ecology 99:1345	N/A	Terry Hughes	terry.hughes@jcu.edu.au	AA	1	0.15	N/A	N/A	N/A	N/A	-9.675	143.425	1606	6468	11569668	2015-2016	2	0	45
AU_1039	AP	16	Torres Strait	187	Australia	Great Barrier Reef	U/N Reef, 09-411	-9.97431	143.436	24	3	2016	N/A	1	1-10	5.5	-1	N/A	N/A	0	4/2/2016	0	4.3	4.3	5.46	0	N/A	Aerial survey	Terry Hughes	Hughes, T. P., J. T. Kerry, and T. Simpson. 2018. Large-scale bleaching of corals on the Great Barrier Reef. Ecology 99:1346	N/A	Terry Hughes	terry.hughes@jcu.edu.au	AA	1	0.17	N/A	N/A	N/A	N/A	-9.975	143.425	1600	6468	11526468	2015-2016	1	0	5.5
AU_1040	AP	16	Torres Strait	187	Australia	Great Barrier Reef	Campbell (Kapker) Island Reef, 09-419a	-9.56641	143.493	24	3	2016	N/A	3	>60	80.5	-1	N/A	N/A	0	4/10/2016	0	4.15	4.15	6.16	0	N/A	Aerial survey	Terry Hughes	Hughes, T. P., J. T. Kerry, and T. Simpson. 2018. Large-scale bleaching of corals on the Great Barrier Reef. Ecology 99:1347	N/A	Terry Hughes	terry.hughes@jcu.edu.au	AA	1	N/A	N/A	N/A	N/A	N/A	-9.575	143.475	1608	6469	11584069	2015-2016	3	0	80.5
AU_1041	AP	16	Torres Strait	187	Australia	Great Barrier Reef	U/N Reef, 09-423	-9.55169	143.514	24	3	2016	N/A	2	10-30	20	-1	N/A	N/A	0	4/10/2016	0	3.55	3.55	5.07	0	N/A	Aerial survey	Terry Hughes	Hughes, T. P., J. T. Kerry, and T. Simpson. 2018. Large-scale bleaching of corals on the Great Barrier Reef. Ecology 99:1348	N/A	Terry Hughes	terry.hughes@jcu.edu.au	AA	1	N/A	N/A	N/A	N/A	N/A	-9.575	143.525	1608	6470	11584070	2015-2016	2	0	20
AU_1042	AP	16	Torres Strait	187	Australia	Great Barrier Reef	Stephens (Ugar) Island, 09-424	-9.50631	143.547	24	3	2016	N/A	1	1-10	5.5	-1	N/A	N/A	0	4/10/2016	0	4.13	4.13	6.12	0	N/A	Aerial survey	Terry Hughes	Hughes, T. P., J. T. Kerry, and T. Simpson. 2018. Large-scale bleaching of corals on the Great Barrier Reef. Ecology 99:1349	N/A	Terry Hughes	terry.hughes@jcu.edu.au	AA	1	N/A	N/A	N/A	N/A	N/A	-9.525	143.525	1609	6470	11591270	2015-2016	1	0	5.5
AU_1043	AP	16	Torres Strait	187	Australia	Great Barrier Reef	U/N Reef, 10-283b	-10.5489	142.348	24	3	2016	N/A	3	>60	80.5	-1	N/A	N/A	0	4/1/2016	0	7.85	7.85	9.04	0	N/A	Aerial survey	Terry Hughes	Hughes, T. P., J. T. Kerry, and T. Simpson. 2018. Large-scale bleaching of corals on the Great Barrier Reef. Ecology 99:1350	N/A	Terry Hughes	terry.hughes@jcu.edu.au	AA	1	0.93	N/A	N/A	N/A	N/A	-10.525	142.325	1589	6446	11447246	2015-2016	3	0	80.5
AU_1044	AP	16	Far Northern GBR	52	Australia	Great Barrier Reef	U/N Reef, 10-299	-10.7754	143.09	24	3	2016	N/A	3	>60	80.5	-1	N/A	N/A	0	4/11/2016	0	10.45	10.45	12.85	0	N/A	Aerial survey	Terry Hughes	Hughes, T. P., J. T. Kerry, and T. Simpson. 2018. Large-scale bleaching of corals on the Great Barrier Reef. Ecology 99:1351	N/A	Terry Hughes	terry.hughes@jcu.edu.au	AA	1	0.48	N/A	N/A	N/A	N/A	-10.775	143.075	1584	6461	11411261	2015-2016	3	0	80.5
AU_1045	AP	16	Torres Strait	187	Australia	Great Barrier Reef	Kagar Reef, 10-302	-10.5995	142.913	24	3	2016	N/A	3	>60	80.5	-1	N/A	N/A	0	4/11/2016	0	8.94	8.94	11.18	0	N/A	Aerial survey	Terry Hughes	Hughes, T. P., J. T. Kerry, and T. Simpson. 2018. Large-scale bleaching of corals on the Great Barrier Reef. Ecology 99:1352	N/A	Terry Hughes	terry.hughes@jcu.edu.au	AA	1	0.92	N/A	N/A	N/A	N/A	-10.575	142.925	1588	6458	11440058	2015-2016	3	0	80.5
AU_1046	AP	16	Far Northern GBR	52	Australia	Great Barrier Reef	Mount Adolphus (Mori) Island, 10-303	-10.6502	142.653	24	3	2016	N/A	3	>60	80.5	-1	N/A	N/A	0	4/3/2016	0	8.55	8.55	10.32	0	N/A	Aerial survey	Terry Hughes	Hughes, T. P., J. T. Kerry, and T. Simpson. 2018. Large-scale bleaching of corals on the Great Barrier Reef. Ecology 99:1353	N/A	Terry Hughes	terry.hughes@jcu.edu.au	AA	1	0.74	N/A	N/A	N/A	N/A	-10.675	142.675	1586	6453	11425653	2015-2016	3	0	80.5
AU_1047	AP	16	Torres Strait	187	Australia	Great Barrier Reef	Mount Adolphus (Mori) Island Reef, 10-303d	-10.6381	142.645	24	3	2016	N/A	3	>60	80.5	-1	N/A	N/A	0	4/2/2016	0	8.23	8.23	9.83	0	N/A	Aerial survey	Terry Hughes	Hughes, T. P., J. T. Kerry, and T. Simpson. 2018. Large-scale bleaching of corals on the Great Barrier Reef. Ecology 99:1354	N/A	Terry Hughes	terry.hughes@jcu.edu.au	AA	1	0.9	N/A	N/A	N/A	N/A	-10.625	142.625	1587	6452	11432852	2015-2016	3	0	80.5
AU_1048	AP	16	Far Northern GBR	52	Australia	Great Barrier Reef	Kai-Damun Reef, 10-305	-10.6522	142.85	24	3	2016	N/A	3	>60	80.5	-1	N/A	N/A	0	4/3/2016	0	8.97	8.97	10.71	0	N/A	Aerial survey	Terry Hughes	Hughes, T. P., J. T. Kerry, and T. Simpson. 2018. Large-scale bleaching of corals on the Great Barrier Reef. Ecology 99:1355	N/A	Terry Hughes	terry.hughes@jcu.edu.au	AA	1	0.59	N/A	N/A	N/A	N/A	-10.675	142.825	1586	6456	11425656	2015-2016	3	0	80.5
AU_1049	AP	16	Far Northern GBR	52	Australia	Great Barrier Reef	Albany Rock Reef, 10-321	-10.7188	142.63	24	3	2016	N/A	3	>60	80.5	-1	N/A	N/A	0	4/2/2016	0	8.51	8.51	10.16	0	N/A	Aerial survey	Terry Hughes	Hughes, T. P., J. T. Kerry, and T. Simpson. 2018. Large-scale bleaching of corals on the Great Barrier Reef. Ecology 99:1356	N/A	Terry Hughes	terry.hughes@jcu.edu.au	AA	1	0.6	N/A	N/A	N/A	N/A	-10.725	142.625	1585	6452	11418452	2015-2016	3	0	80.5
AU_1050	AP	16	Far Northern GBR	52	Australia	Great Barrier Reef	North Brother Reef, 10-322	-10.7008	142.673	24	3	2016	N/A	3	>60	80.5	-1	N/A	N/A	0	4/3/2016	0	8.61	8.61	10.39	0	N/A	Aerial survey	Terry Hughes	Hughes, T. P., J. T. Kerry, and T. Simpson. 2018. Large-scale bleaching of corals on the Great Barrier Reef. Ecology 99:1357	N/A	Terry Hughes	terry.hughes@jcu.edu.au	AA	1	0.59	N/A	N/A	N/A	N/A	-10.725	142.675	1585	6453	11418453	2015-2016	3	0	80.5
AU_1051	AP	16	Far Northern GBR	52	Australia	Great Barrier Reef	Middle Brother Reef, 10-323	-10.7118	142.685	24	3	2016	N/A	3	>60	80.5	-1	N/A	N/A	0	4/3/2016	0	8.61	8.61	10.39	0	N/A	Aerial survey	Terry Hughes	Hughes, T. P., J. T. Kerry, and T. Simpson. 2018. Large-scale bleaching of corals on the Great Barrier Reef. Ecology 99:1358	N/A	Terry Hughes	terry.hughes@jcu.edu.au	AA	1	0.59	N/A	N/A	N/A	N/A	-10.725	142.675	1585	6453	11418453	2015-2016	3	0	80.5
AU_1052	AP	16	Far Northern GBR	52	Australia	Great Barrier Reef	North Ledge, 10-325	-10.6803	142.738	24	3	2016	N/A	3	>60	80.5	-1	N/A	N/A	0	4/3/2016	0	8.8	8.8	10.57	0	N/A	Aerial survey	Terry Hughes	Hughes, T. P., J. T. Kerry, and T. Simpson. 2018. Large-scale bleaching of corals on the Great Barrier Reef. Ecology 99:1359	N/A	Terry Hughes	terry.hughes@jcu.edu.au	AA	1	0.74	N/A	N/A	N/A	N/A	-10.675	142.725	1586	6454	11425654	2015-2016	3	0	80.5
AU_1053	AP	16	Far Northern GBR	52	Australia	Great Barrier Reef	Meggi-Damun Reef, 10-326	-10.6825	142.786	24	3	2016	N/A	3	>60	80.5	-1	N/A	N/A	0	4/3/2016	0	8.83	8.83	10.58	0	N/A	Aerial survey	Terry Hughes	Hughes, T. P., J. T. Kerry, and T. Simpson. 2018. Large-scale bleaching of corals on the Great Barrier Reef. Ecology 99:1360	N/A	Terry Hughes	terry.hughes@jcu.edu.au	AA	1	0.59	N/A	N/A	N/A	N/A	-10.675	142.775	1586	6455	11425655	2015-2016	3	0	80.5
AU_1054	AP	16	Far Northern GBR	52	Australia	Great Barrier Reef	South Ledge, 10-327	-10.7054	142.732	24	3	2016	N/A	3	>60	80.5	-1	N/A	N/A	0	4/3/2016	0	8.87	8.87	10.65	0	N/A	Aerial survey	Terry Hughes	Hughes, T. P., J. T. Kerry, and T. Simpson. 2018. Large-scale bleaching of corals on the Great Barrier Reef. Ecology 99:1361	N/A	Terry Hughes	terry.hughes@jcu.edu.au	AA	1	0.59	N/A	N/A	N/A	N/A	-10.725	142.725	1585	6454	11418454	2015-2016	3	0	80.5
AU_1055	AP	16	Far Northern GBR	52	Australia	Great Barrier Reef	U/N Reef, 10-337	-10.8079	142.929	24	3	2016	N/A	3	>60	80.5	-1	N/A	N/A	0	4/3/2016	0	9.97	9.97	11.84	0	N/A	Aerial survey	Terry Hughes	Hughes, T. P., J. T. Kerry, and T. Simpson. 2018. Large-scale bleaching of corals on the Great Barrier Reef. Ecology 99:1362	N/A	Terry Hughes	terry.hughes@jcu.edu.au	AA	1	0.32	N/A	N/A	N/A	N/A	-10.825	142.925	1583	6458	11404058	2015-2016	3	0	80.5
AU_1056	AP	16	Far Northern GBR	52	Australia	Great Barrier Reef	Womer Reef, 10-338	-10.7998	142.984	24	3	2016	N/A	3	>60	80.5	-1	N/A	N/A	0	4/4/2016	0	10.07	10.07	12.09	0	N/A	Aerial survey	Terry Hughes	Hughes, T. P., J. T. Kerry, and T. Simpson. 2018. Large-scale bleaching of corals on the Great Barrier Reef. Ecology 99:1363	N/A	Terry Hughes	terry.hughes@jcu.edu.au	AA	1	0.33	N/A	N/A	N/A	N/A	-10.775	142.975	1584	6459	11411259	2015-2016	3	0	80.5
AU_1057	AP	16	Torres Strait	187	Australia	Great Barrier Reef	U/N Reef, 10-347a	-10.6473	143.038	24	3	2016	N/A	3	>60	80.5	-1	N/A	N/A	0	4/11/2016	0	9.62	9.62	12.08	0	N/A	Aerial survey	Terry Hughes	Hughes, T. P., J. T. Kerry, and T. Simpson. 2018. Large-scale bleaching of corals on the Great Barrier Reef. Ecology 99:1364	N/A	Terry Hughes	terry.hughes@jcu.edu.au	AA	1	0.64	N/A	N/A	N/A	N/A	-10.625	143.025	1587	6460	11432860	2015-2016	3	0	80.5
AU_1058	AP	16	Far Northern GBR	52	Australia	Great Barrier Reef	U/N Reef, 10-349	-10.6971	143.434	24	3	2016	N/A	3	>60	80.5	-1	N/A	N/A	0	4/4/2016	0	7.64	7.64	9.33	0	N/A	Aerial survey	Terry Hughes	Hughes, T. P., J. T. Kerry, and T. Simpson. 2018. Large-scale bleaching of corals on the Great Barrier Reef. Ecology 99:1365	N/A	Terry Hughes	terry.hughes@jcu.edu.au	AA	1	0.31	N/A	N/A	N/A	N/A	-10.675	143.425	1586	6468	11425668	2015-2016	3	0	80.5
AU_1059	AP	16	Far Northern GBR	52	Australia	Great Barrier Reef	U/N Reef, 10-350	-10.6966	143.466	24	3	2016	N/A	3	>60	80.5	-1	N/A	N/A	0	4/4/2016	0	7.14	7.14	8.49	0	N/A	Aerial survey	Terry Hughes	Hughes, T. P., J. T. Kerry, and T. Simpson. 2018. Large-scale bleaching of corals on the Great Barrier Reef. Ecology 99:1366	N/A	Terry Hughes	terry.hughes@jcu.edu.au	AA	1	0.16	N/A	N/A	N/A	N/A	-10.675	143.475	1586	6469	11425669	2015-2016	3	0	80.5
AU_1060	AP	16	Far Northern GBR	52	Australia	Great Barrier Reef	U/N Reef, 10-351	-10.7318	143.19	24	3	2016	N/A	3	>60	80.5	-1	N/A	N/A	0	4/11/2016	0	10.39	10.39	12.94	0	N/A	Aerial survey	Terry Hughes	Hughes, T. P., J. T. Kerry, and T. Simpson. 2018. Large-scale bleaching of corals on the Great Barrier Reef. Ecology 99:1367	N/A	Terry Hughes	terry.hughes@jcu.edu.au	AA	1	0.48	N/A	N/A	N/A	N/A	-10.725	143.175	1585	6463	11418463	2015-2016	3	0	80.5
AU_1061	AP	16	Far Northern GBR	52	Australia	Great Barrier Reef	U/N Reef, 10-352	-10.7347	143.337	24	3	2016	N/A	3	>60	80.5	-1	N/A	N/A	0	4/11/2016	0	9.36	9.36	11.47	0	N/A	Aerial survey	Terry Hughes	Hughes, T. P., J. T. Kerry, and T. Simpson. 2018. Large-scale bleaching of corals on the Great Barrier Reef. Ecology 99:1368	N/A	Terry Hughes	terry.hughes@jcu.edu.au	AA	1	0.47	N/A	N/A	N/A	N/A	-10.725	143.325	1585	6466	11418466	2015-2016	3	0	80.5
AU_1062	AP	16	Far Northern GBR	52	Australia	Great Barrier Reef	U/N Reef, 10-353	-10.7519	143.094	24	3	2016	N/A	3	>60	80.5	-1	N/A	N/A	0	4/11/2016	0	10.45	10.45	12.85	0	N/A	Aerial survey	Terry Hughes	Hughes, T. P., J. T. Kerry, and T. Simpson. 2018. Large-scale bleaching of corals on the Great Barrier Reef. Ecology 99:1369	N/A	Terry Hughes	terry.hughes@jcu.edu.au	AA	1	0.48	N/A	N/A	N/A	N/A	-10.775	143.075	1584	6461	11411261	2015-2016	3	0	80.5
AU_1063	AP	16	Far Northern GBR	52	Australia	Great Barrier Reef	U/N Reef, 10-355	-10.7568	143.324	24	3	2016	N/A	3	>60	80.5	-1	N/A	N/A	0	4/11/2016	0	9.81	9.81	11.93	0	N/A	Aerial survey	Terry Hughes	Hughes, T. P., J. T. Kerry, and T. Simpson. 2018. Large-scale bleaching of corals on the Great Barrier Reef. Ecology 99:1370	N/A	Terry Hughes	terry.hughes@jcu.edu.au	AA	1	0.47	N/A	N/A	N/A	N/A	-10.775	143.325	1584	6466	11411266	2015-2016	3	0	80.5
AU_1064	AP	16	Torres Strait	187	Australia	Great Barrier Reef	Travers Island, 10-377	-10.3682	142.363	24	3	2016	N/A	2	30-60	45	-1	N/A	N/A	0	4/1/2016	0	7.69	7.69	8.88	0	N/A	Aerial survey	Terry Hughes	Hughes, T. P., J. T. Kerry, and T. Simpson. 2018. Large-scale bleaching of corals on the Great Barrier Reef. Ecology 99:1371	N/A	Terry Hughes	terry.hughes@jcu.edu.au	AA	1	1.1	N/A	N/A	N/A	N/A	-10.375	142.375	1592	6447	11468847	2015-2016	2	0	45
AU_1065	AP	16	Far Northern GBR	52	Australia	Great Barrier Reef	U/N Reef, 10-381	-10.6879	143.964	24	3	2016	N/A	2	10-30	20	-1	N/A	N/A	0	4/4/2016	0	5.43	5.43	6.58	0	N/A	Aerial survey	Terry Hughes	Hughes, T. P., J. T. Kerry, and T. Simpson. 2018. Large-scale bleaching of corals on the Great Barrier Reef. Ecology 99:1372	N/A	Terry Hughes	terry.hughes@jcu.edu.au	AA	1	0.47	N/A	N/A	N/A	N/A	-10.675	143.975	1586	6479	11425679	2015-2016	2	0	20
AU_1066	AP	16	Far Northern GBR	52	Australia	Great Barrier Reef	U/N Reef, 10-384	-10.7097	143.964	24	3	2016	N/A	2	30-60	45	-1	N/A	N/A	0	4/4/2016	0	5.52	5.52	6.66	0	N/A	Aerial survey	Terry Hughes	Hughes, T. P., J. T. Kerry, and T. Simpson. 2018. Large-scale bleaching of corals on the Great Barrier Reef. Ecology 99:1373	N/A	Terry Hughes	terry.hughes@jcu.edu.au	AA	1	0.47	N/A	N/A	N/A	N/A	-10.725	143.975	1585	6479	11418479	2015-2016	2	0	45
AU_1067	AP	16	Far Northern GBR	52	Australia	Great Barrier Reef	U/N Reef, 10-386	-10.7232	143.98	24	3	2016	N/A	2	10-30	20	-1	N/A	N/A	0	4/4/2016	0	5.52	5.52	6.66	0	N/A	Aerial survey	Terry Hughes	Hughes, T. P., J. T. Kerry, and T. Simpson. 2018. Large-scale bleaching of corals on the Great Barrier Reef. Ecology 99:1374	N/A	Terry Hughes	terry.hughes@jcu.edu.au	AA	1	0.47	N/A	N/A	N/A	N/A	-10.725	143.975	1585	6479	11418479	2015-2016	2	0	20
AU_1068	AP	16	Far Northern GBR	52	Australia	Great Barrier Reef	U/N Reef, 10-387	-10.6933	143.521	24	3	2016	N/A	3	>60	80.5	-1	N/A	N/A	0	3/31/2016	0	5.9	5.9	7.05	0	N/A	Aerial survey	Terry Hughes	Hughes, T. P., J. T. Kerry, and T. Simpson. 2018. Large-scale bleaching of corals on the Great Barrier Reef. Ecology 99:1375	N/A	Terry Hughes	terry.hughes@jcu.edu.au	AA	1	0.16	N/A	N/A	N/A	N/A	-10.675	143.525	1586	6470	11425670	2015-2016	3	0	80.5
AU_1069	AP	16	Far Northern GBR	52	Australia	Great Barrier Reef	U/N Reef, 10-390	-10.7404	143.973	24	3	2016	N/A	1	1-10	5.5	-1	N/A	N/A	0	4/4/2016	0	5.52	5.52	6.66	0	N/A	Aerial survey	Terry Hughes	Hughes, T. P., J. T. Kerry, and T. Simpson. 2018. Large-scale bleaching of corals on the Great Barrier Reef. Ecology 99:1376	N/A	Terry Hughes	terry.hughes@jcu.edu.au	AA	1	0.47	N/A	N/A	N/A	N/A	-10.725	143.975	1585	6479	11418479	2015-2016	1	0	5.5
AU_1070	AP	16	Far Northern GBR	52	Australia	Great Barrier Reef	Triangle Reef, 10-391	-10.7554	143.982	24	3	2016	N/A	2	10-30	20	-1	N/A	N/A	0	4/3/2016	0	5.29	5.29	6.3	0	N/A	Aerial survey	Terry Hughes	Hughes, T. P., J. T. Kerry, and T. Simpson. 2018. Large-scale bleaching of corals on the Great Barrier Reef. Ecology 99:1377	N/A	Terry Hughes	terry.hughes@jcu.edu.au	AA	1	0.47	N/A	N/A	N/A	N/A	-10.775	143.975	1584	6479	11411279	2015-2016	2	0	20
AU_1071	AP	16	Far Northern GBR	52	Australia	Great Barrier Reef	U/N Reef, 10-398	-10.7782	143.975	24	3	2016	N/A	2	10-30	20	-1	N/A	N/A	0	4/3/2016	0	5.29	5.29	6.3	0	N/A	Aerial survey	Terry Hughes	Hughes, T. P., J. T. Kerry, and T. Simpson. 2018. Large-scale bleaching of corals on the Great Barrier Reef. Ecology 99:1378	N/A	Terry Hughes	terry.hughes@jcu.edu.au	AA	1	0.47	N/A	N/A	N/A	N/A	-10.775	143.975	1584	6479	11411279	2015-2016	2	0	20
AU_1072	AP	16	Far Northern GBR	52	Australia	Great Barrier Reef	U/N Reef, 10-399	-10.7857	143.985	24	3	2016	N/A	2	30-60	45	-1	N/A	N/A	0	4/3/2016	0	5.29	5.29	6.3	0	N/A	Aerial survey	Terry Hughes	Hughes, T. P., J. T. Kerry, and T. Simpson. 2018. Large-scale bleaching of corals on the Great Barrier Reef. Ecology 99:1379	N/A	Terry Hughes	terry.hughes@jcu.edu.au	AA	1	0.47	N/A	N/A	N/A	N/A	-10.775	143.975	1584	6479	11411279	2015-2016	2	0	45
AU_1073	AP	16	Far Northern GBR	52	Australia	Great Barrier Reef	U/N Reef, 10-402	-10.8055	144.007	24	3	2016	N/A	2	30-60	45	-1	N/A	N/A	0	4/4/2016	0	6.35	6.35	8.02	0	N/A	Aerial survey	Terry Hughes	Hughes, T. P., J. T. Kerry, and T. Simpson. 2018. Large-scale bleaching of corals on the Great Barrier Reef. Ecology 99:1380	N/A	Terry Hughes	terry.hughes@jcu.edu.au	AA	1	0.51	N/A	N/A	N/A	N/A	-10.825	144.025	1583	6480	11404080	2015-2016	2	0	45
AU_1074	AP	16	Far Northern GBR	52	Australia	Great Barrier Reef	U/N Reef, 10-406	-10.8449	144.014	24	3	2016	N/A	2	30-60	45	-1	N/A	N/A	0	4/4/2016	0	6.35	6.35	8.02	0	N/A	Aerial survey	Terry Hughes	Hughes, T. P., J. T. Kerry, and T. Simpson. 2018. Large-scale bleaching of corals on the Great Barrier Reef. Ecology 99:1381	N/A	Terry Hughes	terry.hughes@jcu.edu.au	AA	1	0.51	N/A	N/A	N/A	N/A	-10.825	144.025	1583	6480	11404080	2015-2016	2	0	45
AU_1075	AP	16	Far Northern GBR	52	Australia	Great Barrier Reef	U/N Reef, 10-412	-10.8874	144.014	24	3	2016	N/A	2	10-30	20	-1	N/A	N/A	0	4/4/2016	0	6.03	6.03	7.74	0	N/A	Aerial survey	Terry Hughes	Hughes, T. P., J. T. Kerry, and T. Simpson. 2018. Large-scale bleaching of corals on the Great Barrier Reef. Ecology 99:1382	N/A	Terry Hughes	terry.hughes@jcu.edu.au	AA	1	0.5	N/A	N/A	N/A	N/A	-10.875	144.025	1582	6480	11396880	2015-2016	2	0	20
AU_1076	AP	16	Far Northern GBR	52	Australia	Great Barrier Reef	U/N Reef, 10-414	-10.9267	144.018	24	3	2016	N/A	2	10-30	20	-1	N/A	N/A	0	4/4/2016	0	6.17	6.17	7.91	0	N/A	Aerial survey	Terry Hughes	Hughes, T. P., J. T. Kerry, and T. Simpson. 2018. Large-scale bleaching of corals on the Great Barrier Reef. Ecology 99:1383	N/A	Terry Hughes	terry.hughes@jcu.edu.au	AA	1	0.48	N/A	N/A	N/A	N/A	-10.925	144.025	1581	6480	11389680	2015-2016	2	0	20
AU_1077	AP	16	Far Northern GBR	52	Australia	Great Barrier Reef	U/N Reef, 10-416b	-10.9659	144.032	24	3	2016	N/A	2	30-60	45	-1	N/A	N/A	0	4/4/2016	0	5.93	5.93	7.83	0	N/A	Aerial survey	Terry Hughes	Hughes, T. P., J. T. Kerry, and T. Simpson. 2018. Large-scale bleaching of corals on the Great Barrier Reef. Ecology 99:1384	N/A	Terry Hughes	terry.hughes@jcu.edu.au	AA	1	0.19	N/A	N/A	N/A	N/A	-10.975	144.025	1580	6480	11382480	2015-2016	2	0	45
AU_1078	AP	16	Far Northern GBR	52	Australia	Great Barrier Reef	U/N Reef, 10-418a	-10.9968	144.035	24	3	2016	N/A	2	10-30	20	-1	N/A	N/A	0	4/4/2016	0	5.93	5.93	7.83	0	N/A	Aerial survey	Terry Hughes	Hughes, T. P., J. T. Kerry, and T. Simpson. 2018. Large-scale bleaching of corals on the Great Barrier Reef. Ecology 99:1385	N/A	Terry Hughes	terry.hughes@jcu.edu.au	AA	1	0.19	N/A	N/A	N/A	N/A	-10.975	144.025	1580	6480	11382480	2015-2016	2	0	20
AU_1079	AP	16	Far Northern GBR	52	Australia	Great Barrier Reef	U/N Reef, 10-419a	-11.0078	144.013	24	3	2016	N/A	2	30-60	45	-1	N/A	N/A	0	4/4/2016	0	6.3	6.3	8.23	0	N/A	Aerial survey	Terry Hughes	Hughes, T. P., J. T. Kerry, and T. Simpson. 2018. Large-scale bleaching of corals on the Great Barrier Reef. Ecology 99:1386	N/A	Terry Hughes	terry.hughes@jcu.edu.au	AA	1	0.19	N/A	N/A	N/A	N/A	-11.025	144.025	1579	6480	11375280	2015-2016	2	0	45
AU_1080	AP	16	Far Northern GBR	52	Australia	Great Barrier Reef	U/N Reef, 10-419b	-11.0179	144.013	24	3	2016	N/A	2	10-30	20	-1	N/A	N/A	0	4/4/2016	0	6.3	6.3	8.23	0	N/A	Aerial survey	Terry Hughes	Hughes, T. P., J. T. Kerry, and T. Simpson. 2018. Large-scale bleaching of corals on the Great Barrier Reef. Ecology 99:1387	N/A	Terry Hughes	terry.hughes@jcu.edu.au	AA	1	0.19	N/A	N/A	N/A	N/A	-11.025	144.025	1579	6480	11375280	2015-2016	2	0	20
AU_1081	AP	16	Far Northern GBR	52	Australia	Great Barrier Reef	U/N Reef, 10-420	-11.0178	143.995	24	3	2016	N/A	2	10-30	20	-1	N/A	N/A	0	4/4/2016	0	4.95	4.95	6.48	0	N/A	Aerial survey	Terry Hughes	Hughes, T. P., J. T. Kerry, and T. Simpson. 2018. Large-scale bleaching of corals on the Great Barrier Reef. Ecology 99:1388	N/A	Terry Hughes	terry.hughes@jcu.edu.au	AA	1	0.18	N/A	N/A	N/A	N/A	-11.025	143.975	1579	6479	11375279	2015-2016	2	0	20
AU_1082	AP	16	Far Northern GBR	52	Australia	Great Barrier Reef	U/N Reef, 10-426	-10.9508	144.015	24	3	2016	N/A	1	1-10	5.5	-1	N/A	N/A	0	4/4/2016	0	5.93	5.93	7.83	0	N/A	Aerial survey	Terry Hughes	Hughes, T. P., J. T. Kerry, and T. Simpson. 2018. Large-scale bleaching of corals on the Great Barrier Reef. Ecology 99:1389	N/A	Terry Hughes	terry.hughes@jcu.edu.au	AA	1	0.19	N/A	N/A	N/A	N/A	-10.975	144.025	1580	6480	11382480	2015-2016	1	0	5.5
AU_1083	AP	16	Torres Strait	187	Australia	Great Barrier Reef	Mount Ernest (Nagheer) Island, 10-441	-10.2509	142.483	24	3	2016	N/A	3	>60	80.5	-1	N/A	N/A	0	4/2/2016	0	7.44	7.44	8.84	0	N/A	Aerial survey	Terry Hughes	Hughes, T. P., J. T. Kerry, and T. Simpson. 2018. Large-scale bleaching of corals on the Great Barrier Reef. Ecology 99:1390	N/A	Terry Hughes	terry.hughes@jcu.edu.au	AA	1	1.31	N/A	N/A	N/A	N/A	-10.275	142.475	1594	6449	11483249	2015-2016	3	0	80.5
AU_1084	AP	16	Torres Strait	187	Australia	Great Barrier Reef	Suarji (Burke) Island, 10-449	-10.1606	142.511	24	3	2016	N/A	3	>60	80.5	-1	N/A	N/A	0	4/2/2016	0	7.11	7.11	8.37	0	N/A	Aerial survey	Terry Hughes	Hughes, T. P., J. T. Kerry, and T. Simpson. 2018. Large-scale bleaching of corals on the Great Barrier Reef. Ecology 99:1391	N/A	Terry Hughes	terry.hughes@jcu.edu.au	AA	1	1.37	N/A	N/A	N/A	N/A	-10.175	142.525	1596	6450	11497650	2015-2016	3	0	80.5
AU_1085	AP	16	Torres Strait	187	Australia	Great Barrier Reef	Getullai (Pole) Island, 10-450	-10.1908	142.515	24	3	2016	N/A	3	>60	80.5	-1	N/A	N/A	0	4/2/2016	0	7.11	7.11	8.37	0	N/A	Aerial survey	Terry Hughes	Hughes, T. P., J. T. Kerry, and T. Simpson. 2018. Large-scale bleaching of corals on the Great Barrier Reef. Ecology 99:1392	N/A	Terry Hughes	terry.hughes@jcu.edu.au	AA	1	1.37	N/A	N/A	N/A	N/A	-10.175	142.525	1596	6450	11497650	2015-2016	3	0	80.5
AU_1086	AP	16	Torres Strait	187	Australia	Great Barrier Reef	Saddle Island Reef, 10-456a	-10.172	142.676	24	3	2016	N/A	3	>60	80.5	-1	N/A	N/A	0	4/9/2016	0	7.67	7.67	9.54	0	N/A	Aerial survey	Terry Hughes	Hughes, T. P., J. T. Kerry, and T. Simpson. 2018. Large-scale bleaching of corals on the Great Barrier Reef. Ecology 99:1393	N/A	Terry Hughes	terry.hughes@jcu.edu.au	AA	1	1.1	N/A	N/A	N/A	N/A	-10.175	142.675	1596	6453	11497653	2015-2016	3	0	80.5
AU_1087	AP	16	Torres Strait	187	Australia	Great Barrier Reef	Wednesday (Maururra) Island, 10-458	-10.5291	142.308	24	3	2016	N/A	3	>60	80.5	-1	N/A	N/A	0	4/1/2016	0	7.85	7.85	9.04	0	N/A	Aerial survey	Terry Hughes	Hughes, T. P., J. T. Kerry, and T. Simpson. 2018. Large-scale bleaching of corals on the Great Barrier Reef. Ecology 99:1394	N/A	Terry Hughes	terry.hughes@jcu.edu.au	AA	1	0.93	N/A	N/A	N/A	N/A	-10.525	142.325	1589	6446	11447246	2015-2016	3	0	80.5
AU_1088	AP	16	Torres Strait	187	Australia	Great Barrier Reef	U/N Reef, 10-458b	-10.5202	142.296	24	3	2016	N/A	3	>60	80.5	-1	N/A	N/A	0	4/1/2016	0	7.69	7.69	9.02	0	N/A	Aerial survey	Terry Hughes	Hughes, T. P., J. T. Kerry, and T. Simpson. 2018. Large-scale bleaching of corals on the Great Barrier Reef. Ecology 99:1395	N/A	Terry Hughes	terry.hughes@jcu.edu.au	AA	1	1.21	N/A	N/A	N/A	N/A	-10.525	142.275	1589	6445	11447245	2015-2016	3	0	80.5
AU_1089	AP	16	Torres Strait	187	Australia	Great Barrier Reef	Quoin Island, 10-490	-10.7132	142.37	24	3	2016	N/A	3	>60	80.5	-1	N/A	N/A	0	4/2/2016	0	7.49	7.49	8.79	0	N/A	Aerial survey	Terry Hughes	Hughes, T. P., J. T. Kerry, and T. Simpson. 2018. Large-scale bleaching of corals on the Great Barrier Reef. Ecology 99:1396	N/A	Terry Hughes	terry.hughes@jcu.edu.au	AA	1	0.77	N/A	N/A	N/A	N/A	-10.725	142.375	1585	6447	11418447	2015-2016	3	0	80.5
AU_1090	AP	16	Torres Strait	187	Australia	Great Barrier Reef	U/N Reef, 10-503	-10.6135	143.924	24	3	2016	N/A	1	1-10	5.5	-1	N/A	N/A	0	4/4/2016	0	4.61	4.61	5.56	0	N/A	Aerial survey	Terry Hughes	Hughes, T. P., J. T. Kerry, and T. Simpson. 2018. Large-scale bleaching of corals on the Great Barrier Reef. Ecology 99:1397	N/A	Terry Hughes	terry.hughes@jcu.edu.au	AA	1	0.14	N/A	N/A	N/A	N/A	-10.625	143.925	1587	6478	11432878	2015-2016	1	0	5.5
AU_1091	AP	16	Far Northern GBR	52	Australia	Great Barrier Reef	U/N Reef, 10-514	-10.6531	143.95	24	3	2016	N/A	2	10-30	20	-1	N/A	N/A	0	4/4/2016	0	5.43	5.43	6.58	0	N/A	Aerial survey	Terry Hughes	Hughes, T. P., J. T. Kerry, and T. Simpson. 2018. Large-scale bleaching of corals on the Great Barrier Reef. Ecology 99:1398	N/A	Terry Hughes	terry.hughes@jcu.edu.au	AA	1	0.47	N/A	N/A	N/A	N/A	-10.675	143.975	1586	6479	11425679	2015-2016	2	0	20
AU_1092	AP	16	Torres Strait	187	Australia	Great Barrier Reef	Great Woody (Kai-Yelubi) Island Reef, 10-518c	-10.7086	142.352	24	3	2016	N/A	3	>60	80.5	-1	N/A	N/A	0	4/2/2016	0	7.49	7.49	8.79	0	N/A	Aerial survey	Terry Hughes	Hughes, T. P., J. T. Kerry, and T. Simpson. 2018. Large-scale bleaching of corals on the Great Barrier Reef. Ecology 99:1399	N/A	Terry Hughes	terry.hughes@jcu.edu.au	AA	1	0.77	N/A	N/A	N/A	N/A	-10.725	142.375	1585	6447	11418447	2015-2016	3	0	80.5
AU_1093	AP	16	Torres Strait	187	Australia	Great Barrier Reef	Possession (Bedanug) Island, 10-521	-10.7405	142.391	24	3	2016	N/A	3	>60	80.5	-1	N/A	N/A	0	4/2/2016	0	7.49	7.49	8.79	0	N/A	Aerial survey	Terry Hughes	Hughes, T. P., J. T. Kerry, and T. Simpson. 2018. Large-scale bleaching of corals on the Great Barrier Reef. Ecology 99:1400	N/A	Terry Hughes	terry.hughes@jcu.edu.au	AA	1	0.77	N/A	N/A	N/A	N/A	-10.725	142.375	1585	6447	11418447	2015-2016	3	0	80.5
AU_1094	AP	16	Torres Strait	187	Australia	Great Barrier Reef	U/N Reef, 10-521a	-10.7136	142.415	24	3	2016	N/A	3	>60	80.5	-1	N/A	N/A	0	4/2/2016	0	7.74	7.74	9.2	0	N/A	Aerial survey	Terry Hughes	Hughes, T. P., J. T. Kerry, and T. Simpson. 2018. Large-scale bleaching of corals on the Great Barrier Reef. Ecology 99:1401	N/A	Terry Hughes	terry.hughes@jcu.edu.au	AA	1	0.91	N/A	N/A	N/A	N/A	-10.725	142.425	1585	6448	11418448	2015-2016	3	0	80.5
AU_1095	AP	16	Torres Strait	187	Australia	Great Barrier Reef	U/N Reef, 10-523b	-10.7287	142.413	24	3	2016	N/A	3	>60	80.5	-1	N/A	N/A	0	4/2/2016	0	7.74	7.74	9.2	0	N/A	Aerial survey	Terry Hughes	Hughes, T. P., J. T. Kerry, and T. Simpson. 2018. Large-scale bleaching of corals on the Great Barrier Reef. Ecology 99:1402	N/A	Terry Hughes	terry.hughes@jcu.edu.au	AA	1	0.91	N/A	N/A	N/A	N/A	-10.725	142.425	1585	6448	11418448	2015-2016	3	0	80.5
AU_1096	AP	16	Torres Strait	187	Australia	Great Barrier Reef	Warraber (Sue Islet), 10-541	-10.2076	142.824	24	3	2016	N/A	3	>60	80.5	-1	N/A	N/A	0	4/11/2016	0	7.72	7.72	9.48	0	N/A	Aerial survey	Terry Hughes	Hughes, T. P., J. T. Kerry, and T. Simpson. 2018. Large-scale bleaching of corals on the Great Barrier Reef. Ecology 99:1403	N/A	Terry Hughes	terry.hughes@jcu.edu.au	AA	1	0.9	N/A	N/A	N/A	N/A	-10.225	142.825	1595	6456	11490456	2015-2016	3	0	80.5
AU_1097	AP	16	Torres Strait	187	Australia	Great Barrier Reef	Bet (Burrar) Islet Reef, 10-547b	-10.1641	142.918	24	3	2016	N/A	3	>60	80.5	-1	N/A	N/A	0	4/11/2016	0	7.28	7.28	9.35	0	N/A	Aerial survey	Terry Hughes	Hughes, T. P., J. T. Kerry, and T. Simpson. 2018. Large-scale bleaching of corals on the Great Barrier Reef. Ecology 99:1404	N/A	Terry Hughes	terry.hughes@jcu.edu.au	AA	1	0.3	N/A	N/A	N/A	N/A	-10.175	142.925	1596	6458	11497658	2015-2016	3	0	80.5
AU_1098	AP	16	Torres Strait	187	Australia	Great Barrier Reef	Day Reef, 10-549	-10.0448	142.948	24	3	2016	N/A	2	30-60	45	-1	N/A	N/A	0	4/9/2016	0	7.65	7.65	9.51	0	N/A	Aerial survey	Terry Hughes	Hughes, T. P., J. T. Kerry, and T. Simpson. 2018. Large-scale bleaching of corals on the Great Barrier Reef. Ecology 99:1405	N/A	Terry Hughes	terry.hughes@jcu.edu.au	AA	1	0.15	N/A	N/A	N/A	N/A	-10.025	142.925	1599	6458	11519258	2015-2016	2	0	45
AU_1099	AP	16	Torres Strait	187	Australia	Great Barrier Reef	Susur Reef, 10-562	-10.413	143.248	24	3	2016	N/A	3	>60	80.5	-1	N/A	N/A	0	4/4/2016	0	6.83	6.83	8.75	0	N/A	Aerial survey	Terry Hughes	Hughes, T. P., J. T. Kerry, and T. Simpson. 2018. Large-scale bleaching of corals on the Great Barrier Reef. Ecology 99:1406	N/A	Terry Hughes	terry.hughes@jcu.edu.au	AA	1	0.47	N/A	N/A	N/A	N/A	-10.425	143.225	1591	6464	11461664	2015-2016	3	0	80.5
AU_1100	AP	16	Torres Strait	187	Australia	Great Barrier Reef	Gubmarau Reef, 10-565	-10.3875	143.32	24	3	2016	N/A	3	>60	80.5	-1	N/A	N/A	0	4/4/2016	0	5.98	5.98	7.34	0	N/A	Aerial survey	Terry Hughes	Hughes, T. P., J. T. Kerry, and T. Simpson. 2018. Large-scale bleaching of corals on the Great Barrier Reef. Ecology 99:1407	N/A	Terry Hughes	terry.hughes@jcu.edu.au	AA	1	0.32	N/A	N/A	N/A	N/A	-10.375	143.325	1592	6466	11468866	2015-2016	3	0	80.5
AU_1101	AP	16	Torres Strait	187	Australia	Great Barrier Reef	Half Way (Zuizin) Island Reef, 10-566a	-10.1083	143.322	24	3	2016	N/A	2	10-30	20	-1	N/A	N/A	0	4/2/2016	0	5.34	5.34	6.58	0	N/A	Aerial survey	Terry Hughes	Hughes, T. P., J. T. Kerry, and T. Simpson. 2018. Large-scale bleaching of corals on the Great Barrier Reef. Ecology 99:1408	N/A	Terry Hughes	terry.hughes@jcu.edu.au	AA	1	0.18	N/A	N/A	N/A	N/A	-10.125	143.325	1597	6466	11504866	2015-2016	2	0	20
AU_1102	AP	16	Torres Strait	187	Australia	Great Barrier Reef	Kodnasem Reef, 10-567	-10.1434	143.342	24	3	2016	N/A	2	30-60	45	-1	N/A	N/A	0	4/2/2016	0	5.34	5.34	6.58	0	N/A	Aerial survey	Terry Hughes	Hughes, T. P., J. T. Kerry, and T. Simpson. 2018. Large-scale bleaching of corals on the Great Barrier Reef. Ecology 99:1409	N/A	Terry Hughes	terry.hughes@jcu.edu.au	AA	1	0.18	N/A	N/A	N/A	N/A	-10.125	143.325	1597	6466	11504866	2015-2016	2	0	45
AU_1103	AP	16	Torres Strait	187	Australia	Great Barrier Reef	U/N Reef, 10-568	-10.0871	143.35	24	3	2016	N/A	2	10-30	20	-1	N/A	N/A	0	4/2/2016	0	4.89	4.89	5.93	0	N/A	Aerial survey	Terry Hughes	Hughes, T. P., J. T. Kerry, and T. Simpson. 2018. Large-scale bleaching of corals on the Great Barrier Reef. Ecology 99:1410	N/A	Terry Hughes	terry.hughes@jcu.edu.au	AA	1	0.18	N/A	N/A	N/A	N/A	-10.075	143.375	1598	6467	11512067	2015-2016	2	0	20
AU_1104	AP	16	Torres Strait	187	Australia	Great Barrier Reef	Maped-Au-Kap Reef, 10-572	-10.3241	143.386	24	3	2016	N/A	2	10-30	20	-1	N/A	N/A	0	3/31/2016	0	5.89	5.89	6.78	0	N/A	Aerial survey	Terry Hughes	Hughes, T. P., J. T. Kerry, and T. Simpson. 2018. Large-scale bleaching of corals on the Great Barrier Reef. Ecology 99:1411	N/A	Terry Hughes	terry.hughes@jcu.edu.au	AA	1	0.46	N/A	N/A	N/A	N/A	-10.325	143.375	1593	6467	11476067	2015-2016	2	0	20
AU_1105	AP	16	Torres Strait	187	Australia	Great Barrier Reef	Thiwlag Reef, 10-575	-10.5984	143.09	24	3	2016	N/A	3	>60	80.5	-1	N/A	N/A	0	4/11/2016	0	8.85	8.85	11.33	0	N/A	Aerial survey	Terry Hughes	Hughes, T. P., J. T. Kerry, and T. Simpson. 2018. Large-scale bleaching of corals on the Great Barrier Reef. Ecology 99:1412	N/A	Terry Hughes	terry.hughes@jcu.edu.au	AA	1	0.64	N/A	N/A	N/A	N/A	-10.575	143.075	1588	6461	11440061	2015-2016	3	0	80.5
AU_1106	AP	16	Torres Strait	187	Australia	Great Barrier Reef	Dugong (Athub) Islet, 10-576	-10.5209	143.1	24	3	2016	N/A	3	>60	80.5	-1	N/A	N/A	0	4/11/2016	0	8.37	8.37	10.7	0	N/A	Aerial survey	Terry Hughes	Hughes, T. P., J. T. Kerry, and T. Simpson. 2018. Large-scale bleaching of corals on the Great Barrier Reef. Ecology 99:1413	N/A	Terry Hughes	terry.hughes@jcu.edu.au	AA	1	0.49	N/A	N/A	N/A	N/A	-10.525	143.075	1589	6461	11447261	2015-2016	3	0	80.5
AU_1107	AP	16	Torres Strait	187	Australia	Great Barrier Reef	U/N Reef, 10-577a	-10.4736	143.139	24	3	2016	N/A	3	>60	80.5	-1	N/A	N/A	0	4/4/2016	0	8.03	8.03	10.06	0	N/A	Aerial survey	Terry Hughes	Hughes, T. P., J. T. Kerry, and T. Simpson. 2018. Large-scale bleaching of corals on the Great Barrier Reef. Ecology 99:1414	N/A	Terry Hughes	terry.hughes@jcu.edu.au	AA	1	0.49	N/A	N/A	N/A	N/A	-10.475	143.125	1590	6462	11454462	2015-2016	3	0	80.5
AU_1108	AP	16	Torres Strait	187	Australia	Great Barrier Reef	Bayag Reef, 10-582a	-10.5602	143.251	24	3	2016	N/A	3	>60	80.5	-1	N/A	N/A	0	4/11/2016	0	8.34	8.34	10.35	0	N/A	Aerial survey	Terry Hughes	Hughes, T. P., J. T. Kerry, and T. Simpson. 2018. Large-scale bleaching of corals on the Great Barrier Reef. Ecology 99:1415	N/A	Terry Hughes	terry.hughes@jcu.edu.au	AA	1	0.33	N/A	N/A	N/A	N/A	-10.575	143.275	1588	6465	11440065	2015-2016	3	0	80.5
AU_1109	AP	16	Torres Strait	187	Australia	Great Barrier Reef	Au-Masig-Reef, 10-583	-10.4761	143.291	24	3	2016	N/A	3	>60	80.5	-1	N/A	N/A	0	4/4/2016	0	7.1	7.1	8.87	0	N/A	Aerial survey	Terry Hughes	Hughes, T. P., J. T. Kerry, and T. Simpson. 2018. Large-scale bleaching of corals on the Great Barrier Reef. Ecology 99:1416	N/A	Terry Hughes	terry.hughes@jcu.edu.au	AA	1	0.32	N/A	N/A	N/A	N/A	-10.475	143.275	1590	6465	11454465	2015-2016	3	0	80.5
AU_1110	AP	16	Torres Strait	187	Australia	Great Barrier Reef	Wap Reef, 10-585	-10.5397	143.355	24	3	2016	N/A	3	>60	80.5	-1	N/A	N/A	0	4/4/2016	0	6.58	6.58	8.18	0	N/A	Aerial survey	Terry Hughes	Hughes, T. P., J. T. Kerry, and T. Simpson. 2018. Large-scale bleaching of corals on the Great Barrier Reef. Ecology 99:1417	N/A	Terry Hughes	terry.hughes@jcu.edu.au	AA	1	0.31	N/A	N/A	N/A	N/A	-10.525	143.375	1589	6467	11447267	2015-2016	3	0	80.5
AU_1111	AP	16	Torres Strait	187	Australia	Great Barrier Reef	Gurigur Reef, 10-598a	-10.0251	143.432	24	3	2016	N/A	2	10-30	20	-1	N/A	N/A	0	4/2/2016	0	4.33	4.33	5.48	0	N/A	Aerial survey	Terry Hughes	Hughes, T. P., J. T. Kerry, and T. Simpson. 2018. Large-scale bleaching of corals on the Great Barrier Reef. Ecology 99:1418	N/A	Terry Hughes	terry.hughes@jcu.edu.au	AA	1	0.17	N/A	N/A	N/A	N/A	-10.025	143.425	1599	6468	11519268	2015-2016	2	0	20
AU_1112	AP	16	Torres Strait	187	Australia	Great Barrier Reef	Kai-Wareg Reef, 10-619	-10.1799	143.453	24	3	2016	N/A	2	10-30	20	-1	N/A	N/A	0	3/31/2016	0	4.67	4.67	5.52	0	N/A	Aerial survey	Terry Hughes	Hughes, T. P., J. T. Kerry, and T. Simpson. 2018. Large-scale bleaching of corals on the Great Barrier Reef. Ecology 99:1419	N/A	Terry Hughes	terry.hughes@jcu.edu.au	AA	1	0.34	N/A	N/A	N/A	N/A	-10.175	143.475	1596	6469	11497669	2015-2016	2	0	20
AU_1113	AP	16	Torres Strait	187	Australia	Great Barrier Reef	Maggi-Wareg Reef, 10-624	-10.2599	143.487	24	3	2016	N/A	1	1-10	5.5	-1	N/A	N/A	0	3/31/2016	0	4.89	4.89	5.73	0	N/A	Aerial survey	Terry Hughes	Hughes, T. P., J. T. Kerry, and T. Simpson. 2018. Large-scale bleaching of corals on the Great Barrier Reef. Ecology 99:1420	N/A	Terry Hughes	terry.hughes@jcu.edu.au	AA	1	0.32	N/A	N/A	N/A	N/A	-10.275	143.475	1594	6469	11483269	2015-2016	1	0	5.5
AU_1114	AP	16	Far Northern GBR	52	Australia	Great Barrier Reef	U/N Reef, 10-800	-10.8107	142.739	24	3	2016	N/A	3	>60	80.5	-1	N/A	N/A	0	4/2/2016	0	9.39	9.39	11.05	0	N/A	Aerial survey	Terry Hughes	Hughes, T. P., J. T. Kerry, and T. Simpson. 2018. Large-scale bleaching of corals on the Great Barrier Reef. Ecology 99:1421	N/A	Terry Hughes	terry.hughes@jcu.edu.au	AA	1	0.3	N/A	N/A	N/A	N/A	-10.825	142.725	1583	6454	11404054	2015-2016	3	0	80.5
AU_1115	AP	16	Far Northern GBR	52	Australia	Great Barrier Reef	U/N Reef, 11-072	-11.2826	143.995	24	3	2016	N/A	2	30-60	45	-1	N/A	N/A	0	4/2/2016	0	6.67	6.67	8.16	0	N/A	Aerial survey	Terry Hughes	Hughes, T. P., J. T. Kerry, and T. Simpson. 2018. Large-scale bleaching of corals on the Great Barrier Reef. Ecology 99:1422	N/A	Terry Hughes	terry.hughes@jcu.edu.au	AA	1	0.34	N/A	N/A	N/A	N/A	-11.275	143.975	1574	6479	11339279	2015-2016	2	0	45
AU_1116	AP	16	Far Northern GBR	52	Australia	Great Barrier Reef	U/N Reef, 11-073	-11.2824	144.006	24	3	2016	N/A	2	30-60	45	-1	N/A	N/A	0	4/4/2016	0	7.11	7.11	8.95	0	N/A	Aerial survey	Terry Hughes	Hughes, T. P., J. T. Kerry, and T. Simpson. 2018. Large-scale bleaching of corals on the Great Barrier Reef. Ecology 99:1423	N/A	Terry Hughes	terry.hughes@jcu.edu.au	AA	1	0.37	N/A	N/A	N/A	N/A	-11.275	144.025	1574	6480	11339280	2015-2016	2	0	45
AU_1117	AP	16	Far Northern GBR	52	Australia	Great Barrier Reef	U/N Reef, 11-074	-11.2949	143.996	24	3	2016	N/A	2	30-60	45	-1	N/A	N/A	0	4/2/2016	0	6.67	6.67	8.16	0	N/A	Aerial survey	Terry Hughes	Hughes, T. P., J. T. Kerry, and T. Simpson. 2018. Large-scale bleaching of corals on the Great Barrier Reef. Ecology 99:1424	N/A	Terry Hughes	terry.hughes@jcu.edu.au	AA	1	0.34	N/A	N/A	N/A	N/A	-11.275	143.975	1574	6479	11339279	2015-2016	2	0	45
AU_1118	AP	16	Far Northern GBR	52	Australia	Great Barrier Reef	U/N Reef, 11-075	-11.2953	143.979	24	3	2016	N/A	2	10-30	20	-1	N/A	N/A	0	4/2/2016	0	6.67	6.67	8.16	0	N/A	Aerial survey	Terry Hughes	Hughes, T. P., J. T. Kerry, and T. Simpson. 2018. Large-scale bleaching of corals on the Great Barrier Reef. Ecology 99:1425	N/A	Terry Hughes	terry.hughes@jcu.edu.au	AA	1	0.34	N/A	N/A	N/A	N/A	-11.275	143.975	1574	6479	11339279	2015-2016	2	0	20
AU_1119	AP	16	Far Northern GBR	52	Australia	Great Barrier Reef	U/N Reef, 11-076	-11.3093	143.981	24	3	2016	N/A	2	10-30	20	-1	N/A	N/A	0	4/2/2016	0	7.06	7.06	8.72	0	N/A	Aerial survey	Terry Hughes	Hughes, T. P., J. T. Kerry, and T. Simpson. 2018. Large-scale bleaching of corals on the Great Barrier Reef. Ecology 99:1426	N/A	Terry Hughes	terry.hughes@jcu.edu.au	AA	1	0.34	N/A	N/A	N/A	N/A	-11.325	143.975	1573	6479	11332079	2015-2016	2	0	20
AU_1120	AP	16	Far Northern GBR	52	Australia	Great Barrier Reef	U/N Reef, 11-077	-11.3224	143.962	24	3	2016	N/A	2	10-30	20	-1	N/A	N/A	0	4/2/2016	0	7.06	7.06	8.72	0	N/A	Aerial survey	Terry Hughes	Hughes, T. P., J. T. Kerry, and T. Simpson. 2018. Large-scale bleaching of corals on the Great Barrier Reef. Ecology 99:1427	N/A	Terry Hughes	terry.hughes@jcu.edu.au	AA	1	0.34	N/A	N/A	N/A	N/A	-11.325	143.975	1573	6479	11332079	2015-2016	2	0	20
AU_1121	AP	16	Far Northern GBR	52	Australia	Great Barrier Reef	U/N Reef, 11-081	-11.3482	143.957	24	3	2016	N/A	2	10-30	20	-1	N/A	N/A	0	4/2/2016	0	7.06	7.06	8.72	0	N/A	Aerial survey	Terry Hughes	Hughes, T. P., J. T. Kerry, and T. Simpson. 2018. Large-scale bleaching of corals on the Great Barrier Reef. Ecology 99:1428	N/A	Terry Hughes	terry.hughes@jcu.edu.au	AA	1	0.34	N/A	N/A	N/A	N/A	-11.325	143.975	1573	6479	11332079	2015-2016	2	0	20
AU_1122	AP	16	Far Northern GBR	52	Australia	Great Barrier Reef	U/N Reef, 11-082	-11.3559	143.952	24	3	2016	N/A	2	10-30	20	-1	N/A	N/A	0	4/2/2016	0	7.11	7.11	8.78	0	N/A	Aerial survey	Terry Hughes	Hughes, T. P., J. T. Kerry, and T. Simpson. 2018. Large-scale bleaching of corals on the Great Barrier Reef. Ecology 99:1429	N/A	Terry Hughes	terry.hughes@jcu.edu.au	AA	1	0.34	N/A	N/A	N/A	N/A	-11.375	143.975	1572	6479	11324879	2015-2016	2	0	20
AU_1123	AP	16	Far Northern GBR	52	Australia	Great Barrier Reef	U/N Reef, 11-083	-11.361	143.964	24	3	2016	N/A	2	10-30	20	-1	N/A	N/A	0	4/2/2016	0	7.11	7.11	8.78	0	N/A	Aerial survey	Terry Hughes	Hughes, T. P., J. T. Kerry, and T. Simpson. 2018. Large-scale bleaching of corals on the Great Barrier Reef. Ecology 99:1430	N/A	Terry Hughes	terry.hughes@jcu.edu.au	AA	1	0.34	N/A	N/A	N/A	N/A	-11.375	143.975	1572	6479	11324879	2015-2016	2	0	20
AU_1124	AP	16	Far Northern GBR	52	Australia	Great Barrier Reef	U/N Reef, 11-087b	-11.3715	143.959	24	3	2016	N/A	2	10-30	20	-1	N/A	N/A	0	4/2/2016	0	7.11	7.11	8.78	0	N/A	Aerial survey	Terry Hughes	Hughes, T. P., J. T. Kerry, and T. Simpson. 2018. Large-scale bleaching of corals on the Great Barrier Reef. Ecology 99:1431	N/A	Terry Hughes	terry.hughes@jcu.edu.au	AA	1	0.34	N/A	N/A	N/A	N/A	-11.375	143.975	1572	6479	11324879	2015-2016	2	0	20
AU_1125	AP	16	Far Northern GBR	52	Australia	Great Barrier Reef	U/N Reef, 11-088	-11.3832	143.96	24	3	2016	N/A	2	30-60	45	-1	N/A	N/A	0	4/2/2016	0	7.11	7.11	8.78	0	N/A	Aerial survey	Terry Hughes	Hughes, T. P., J. T. Kerry, and T. Simpson. 2018. Large-scale bleaching of corals on the Great Barrier Reef. Ecology 99:1432	N/A	Terry Hughes	terry.hughes@jcu.edu.au	AA	1	0.34	N/A	N/A	N/A	N/A	-11.375	143.975	1572	6479	11324879	2015-2016	2	0	45
AU_1126	AP	16	Far Northern GBR	52	Australia	Great Barrier Reef	U/N Reef, 11-089b	-11.3922	143.958	24	3	2016	N/A	2	10-30	20	-1	N/A	N/A	0	4/2/2016	0	7.11	7.11	8.78	0	N/A	Aerial survey	Terry Hughes	Hughes, T. P., J. T. Kerry, and T. Simpson. 2018. Large-scale bleaching of corals on the Great Barrier Reef. Ecology 99:1433	N/A	Terry Hughes	terry.hughes@jcu.edu.au	AA	1	0.34	N/A	N/A	N/A	N/A	-11.375	143.975	1572	6479	11324879	2015-2016	2	0	20
AU_1127	AP	16	Far Northern GBR	52	Australia	Great Barrier Reef	U/N Reef, 11-091	-11.4024	143.964	24	3	2016	N/A	2	10-30	20	-1	N/A	N/A	0	4/2/2016	0	7.17	7.17	8.84	0	N/A	Aerial survey	Terry Hughes	Hughes, T. P., J. T. Kerry, and T. Simpson. 2018. Large-scale bleaching of corals on the Great Barrier Reef. Ecology 99:1434	N/A	Terry Hughes	terry.hughes@jcu.edu.au	AA	1	0.62	N/A	N/A	N/A	N/A	-11.425	143.975	1571	6479	11317679	2015-2016	2	0	20
AU_1128	AP	16	Far Northern GBR	52	Australia	Great Barrier Reef	U/N Reef, 11-094	-11.4116	143.965	24	3	2016	N/A	2	30-60	45	-1	N/A	N/A	0	4/2/2016	0	7.17	7.17	8.84	0	N/A	Aerial survey	Terry Hughes	Hughes, T. P., J. T. Kerry, and T. Simpson. 2018. Large-scale bleaching of corals on the Great Barrier Reef. Ecology 99:1435	N/A	Terry Hughes	terry.hughes@jcu.edu.au	AA	1	0.62	N/A	N/A	N/A	N/A	-11.425	143.975	1571	6479	11317679	2015-2016	2	0	45
AU_1129	AP	16	Far Northern GBR	52	Australia	Great Barrier Reef	U/N Reef, 11-095	-11.416	143.97	24	3	2016	N/A	2	10-30	20	-1	N/A	N/A	0	4/2/2016	0	7.17	7.17	8.84	0	N/A	Aerial survey	Terry Hughes	Hughes, T. P., J. T. Kerry, and T. Simpson. 2018. Large-scale bleaching of corals on the Great Barrier Reef. Ecology 99:1436	N/A	Terry Hughes	terry.hughes@jcu.edu.au	AA	1	0.62	N/A	N/A	N/A	N/A	-11.425	143.975	1571	6479	11317679	2015-2016	2	0	20
AU_1130	AP	16	Far Northern GBR	52	Australia	Great Barrier Reef	U/N Reef, 11-096	-11.4212	143.975	24	3	2016	N/A	1	1-10	5.5	-1	N/A	N/A	0	4/2/2016	0	7.17	7.17	8.84	0	N/A	Aerial survey	Terry Hughes	Hughes, T. P., J. T. Kerry, and T. Simpson. 2018. Large-scale bleaching of corals on the Great Barrier Reef. Ecology 99:1437	N/A	Terry Hughes	terry.hughes@jcu.edu.au	AA	1	0.62	N/A	N/A	N/A	N/A	-11.425	143.975	1571	6479	11317679	2015-2016	1	0	5.5
AU_1131	AP	16	Far Northern GBR	52	Australia	Great Barrier Reef	U/N Reef, 11-097	-11.4274	143.974	24	3	2016	N/A	0	<1	0	-1	N/A	N/A	0	4/2/2016	0	7.17	7.17	8.84	0	N/A	Aerial survey	Terry Hughes	Hughes, T. P., J. T. Kerry, and T. Simpson. 2018. Large-scale bleaching of corals on the Great Barrier Reef. Ecology 99:1438	N/A	Terry Hughes	terry.hughes@jcu.edu.au	AA	1	0.62	N/A	N/A	N/A	N/A	-11.425	143.975	1571	6479	11317679	2015-2016	0	0	0
AU_1132	AP	16	Far Northern GBR	52	Australia	Great Barrier Reef	U/N Reef, 11-102	-11.4631	143.968	24	3	2016	N/A	1	1-10	5.5	-1	N/A	N/A	0	4/2/2016	0	7.19	7.19	8.85	0	N/A	Aerial survey	Terry Hughes	Hughes, T. P., J. T. Kerry, and T. Simpson. 2018. Large-scale bleaching of corals on the Great Barrier Reef. Ecology 99:1439	N/A	Terry Hughes	terry.hughes@jcu.edu.au	AA	1	0.48	N/A	N/A	N/A	N/A	-11.475	143.975	1570	6479	11310479	2015-2016	1	0	5.5
AU_1133	AP	16	Far Northern GBR	52	Australia	Great Barrier Reef	U/N Reef, 11-109a	-11.4921	143.924	24	3	2016	N/A	0	<1	0	-1	N/A	N/A	0	4/2/2016	0	6.93	6.93	8.54	0	N/A	Aerial survey	Terry Hughes	Hughes, T. P., J. T. Kerry, and T. Simpson. 2018. Large-scale bleaching of corals on the Great Barrier Reef. Ecology 99:1440	N/A	Terry Hughes	terry.hughes@jcu.edu.au	AA	1	0.31	N/A	N/A	N/A	N/A	-11.475	143.925	1570	6478	11310478	2015-2016	0	0	0
AU_1134	AP	16	Far Northern GBR	52	Australia	Great Barrier Reef	U/N Reef, 11-109b	-11.4827	143.946	24	3	2016	N/A	1	1-10	5.5	-1	N/A	N/A	0	4/2/2016	0	6.93	6.93	8.54	0	N/A	Aerial survey	Terry Hughes	Hughes, T. P., J. T. Kerry, and T. Simpson. 2018. Large-scale bleaching of corals on the Great Barrier Reef. Ecology 99:1441	N/A	Terry Hughes	terry.hughes@jcu.edu.au	AA	1	0.31	N/A	N/A	N/A	N/A	-11.475	143.925	1570	6478	11310478	2015-2016	1	0	5.5
AU_1135	AP	16	Far Northern GBR	52	Australia	Great Barrier Reef	U/N Reef, 11-110	-11.4899	143.858	24	3	2016	N/A	0	<1	0	-1	N/A	N/A	0	4/2/2016	0	6.94	6.94	8.53	0	N/A	Aerial survey	Terry Hughes	Hughes, T. P., J. T. Kerry, and T. Simpson. 2018. Large-scale bleaching of corals on the Great Barrier Reef. Ecology 99:1442	N/A	Terry Hughes	terry.hughes@jcu.edu.au	AA	1	0.44	N/A	N/A	N/A	N/A	-11.475	143.875	1570	6477	11310477	2015-2016	0	0	0
AU_1136	AP	16	Far Northern GBR	52	Australia	Great Barrier Reef	U/N Reef, 11-113	-11.0393	144.017	24	3	2016	N/A	0	<1	0	-1	N/A	N/A	0	4/4/2016	0	6.3	6.3	8.23	0	N/A	Aerial survey	Terry Hughes	Hughes, T. P., J. T. Kerry, and T. Simpson. 2018. Large-scale bleaching of corals on the Great Barrier Reef. Ecology 99:1443	N/A	Terry Hughes	terry.hughes@jcu.edu.au	AA	1	0.19	N/A	N/A	N/A	N/A	-11.025	144.025	1579	6480	11375280	2015-2016	0	0	0
AU_1137	AP	16	Far Northern GBR	52	Australia	Great Barrier Reef	U/N Reef, 11-114	-11.049	144.022	24	3	2016	N/A	1	1-10	5.5	-1	N/A	N/A	0	4/4/2016	0	6.3	6.3	8.23	0	N/A	Aerial survey	Terry Hughes	Hughes, T. P., J. T. Kerry, and T. Simpson. 2018. Large-scale bleaching of corals on the Great Barrier Reef. Ecology 99:1444	N/A	Terry Hughes	terry.hughes@jcu.edu.au	AA	1	0.19	N/A	N/A	N/A	N/A	-11.025	144.025	1579	6480	11375280	2015-2016	1	0	5.5
AU_1138	AP	16	Far Northern GBR	52	Australia	Great Barrier Reef	U/N Reef, 11-115	-11.0549	144.034	24	3	2016	N/A	2	30-60	45	-1	N/A	N/A	0	4/4/2016	0	6.06	6.06	8	0	N/A	Aerial survey	Terry Hughes	Hughes, T. P., J. T. Kerry, and T. Simpson. 2018. Large-scale bleaching of corals on the Great Barrier Reef. Ecology 99:1445	N/A	Terry Hughes	terry.hughes@jcu.edu.au	AA	1	0.19	N/A	N/A	N/A	N/A	-11.075	144.025	1578	6480	11368080	2015-2016	2	0	45
AU_1139	AP	16	Far Northern GBR	52	Australia	Great Barrier Reef	U/N Reef, 11-116	-11.0692	144.041	24	3	2016	N/A	2	30-60	45	-1	N/A	N/A	0	4/4/2016	0	6.06	6.06	8	0	N/A	Aerial survey	Terry Hughes	Hughes, T. P., J. T. Kerry, and T. Simpson. 2018. Large-scale bleaching of corals on the Great Barrier Reef. Ecology 99:1446	N/A	Terry Hughes	terry.hughes@jcu.edu.au	AA	1	0.19	N/A	N/A	N/A	N/A	-11.075	144.025	1578	6480	11368080	2015-2016	2	0	45
AU_1140	AP	16	Far Northern GBR	52	Australia	Great Barrier Reef	U/N Reef, 11-117	-11.1034	144.044	24	3	2016	N/A	2	30-60	45	-1	N/A	N/A	0	4/4/2016	0	6.46	6.46	8.42	0	N/A	Aerial survey	Terry Hughes	Hughes, T. P., J. T. Kerry, and T. Simpson. 2018. Large-scale bleaching of corals on the Great Barrier Reef. Ecology 99:1447	N/A	Terry Hughes	terry.hughes@jcu.edu.au	AA	1	0.19	N/A	N/A	N/A	N/A	-11.125	144.025	1577	6480	11360880	2015-2016	2	0	45
AU_1141	AP	16	Far Northern GBR	52	Australia	Great Barrier Reef	U/N Reef, 11-118a	-11.1316	144.033	24	3	2016	N/A	1	1-10	5.5	-1	N/A	N/A	0	4/4/2016	0	6.46	6.46	8.42	0	N/A	Aerial survey	Terry Hughes	Hughes, T. P., J. T. Kerry, and T. Simpson. 2018. Large-scale bleaching of corals on the Great Barrier Reef. Ecology 99:1448	N/A	Terry Hughes	terry.hughes@jcu.edu.au	AA	1	0.19	N/A	N/A	N/A	N/A	-11.125	144.025	1577	6480	11360880	2015-2016	1	0	5.5
AU_1142	AP	16	Far Northern GBR	52	Australia	Great Barrier Reef	U/N Reef, 11-119	-11.146	144.058	24	3	2016	N/A	2	30-60	45	-1	N/A	N/A	0	4/4/2016	0	7.22	7.22	9.26	0	N/A	Aerial survey	Terry Hughes	Hughes, T. P., J. T. Kerry, and T. Simpson. 2018. Large-scale bleaching of corals on the Great Barrier Reef. Ecology 99:1449	N/A	Terry Hughes	terry.hughes@jcu.edu.au	AA	1	0.36	N/A	N/A	N/A	N/A	-11.125	144.075	1577	6481	11360881	2015-2016	2	0	45
AU_1143	AP	16	Far Northern GBR	52	Australia	Great Barrier Reef	U/N Reef, 11-120	-11.1852	144.06	24	3	2016	N/A	2	30-60	45	-1	N/A	N/A	0	4/4/2016	0	7.12	7.12	9.15	0	N/A	Aerial survey	Terry Hughes	Hughes, T. P., J. T. Kerry, and T. Simpson. 2018. Large-scale bleaching of corals on the Great Barrier Reef. Ecology 99:1450	N/A	Terry Hughes	terry.hughes@jcu.edu.au	AA	1	0.38	N/A	N/A	N/A	N/A	-11.175	144.075	1576	6481	11353681	2015-2016	2	0	45
AU_1144	AP	16	Far Northern GBR	52	Australia	Great Barrier Reef	U/N Reef, 11-122	-11.2007	144.047	24	3	2016	N/A	2	10-30	20	-1	N/A	N/A	0	4/4/2016	0	6.89	6.89	8.71	0	N/A	Aerial survey	Terry Hughes	Hughes, T. P., J. T. Kerry, and T. Simpson. 2018. Large-scale bleaching of corals on the Great Barrier Reef. Ecology 99:1451	N/A	Terry Hughes	terry.hughes@jcu.edu.au	AA	1	0.36	N/A	N/A	N/A	N/A	-11.225	144.025	1575	6480	11346480	2015-2016	2	0	20
AU_1145	AP	16	Far Northern GBR	52	Australia	Great Barrier Reef	U/N Reef, 11-123	-11.2097	144.051	24	3	2016	N/A	2	10-30	20	-1	N/A	N/A	0	4/4/2016	0	7.22	7.22	9.12	0	N/A	Aerial survey	Terry Hughes	Hughes, T. P., J. T. Kerry, and T. Simpson. 2018. Large-scale bleaching of corals on the Great Barrier Reef. Ecology 99:1452	N/A	Terry Hughes	terry.hughes@jcu.edu.au	AA	1	0.39	N/A	N/A	N/A	N/A	-11.225	144.075	1575	6481	11346481	2015-2016	2	0	20
AU_1146	AP	16	Far Northern GBR	52	Australia	Great Barrier Reef	U/N Reef, 11-124	-11.2175	144.056	24	3	2016	N/A	1	1-10	5.5	-1	N/A	N/A	0	4/4/2016	0	7.22	7.22	9.12	0	N/A	Aerial survey	Terry Hughes	Hughes, T. P., J. T. Kerry, and T. Simpson. 2018. Large-scale bleaching of corals on the Great Barrier Reef. Ecology 99:1453	N/A	Terry Hughes	terry.hughes@jcu.edu.au	AA	1	0.39	N/A	N/A	N/A	N/A	-11.225	144.075	1575	6481	11346481	2015-2016	1	0	5.5
AU_1147	AP	16	Far Northern GBR	52	Australia	Great Barrier Reef	Stark Reef, 11-125	-11.2613	144.066	24	3	2016	N/A	2	30-60	45	-1	N/A	N/A	0	4/4/2016	0	7.54	7.54	9.44	0	N/A	Aerial survey	Terry Hughes	Hughes, T. P., J. T. Kerry, and T. Simpson. 2018. Large-scale bleaching of corals on the Great Barrier Reef. Ecology 99:1454	N/A	Terry Hughes	terry.hughes@jcu.edu.au	AA	1	0.41	N/A	N/A	N/A	N/A	-11.275	144.075	1574	6481	11339281	2015-2016	2	0	45
AU_1148	AP	16	Far Northern GBR	52	Australia	Great Barrier Reef	U/N Reef, 11-126b	-11.2693	144.018	24	3	2016	N/A	2	10-30	20	-1	N/A	N/A	0	4/4/2016	0	7.11	7.11	8.95	0	N/A	Aerial survey	Terry Hughes	Hughes, T. P., J. T. Kerry, and T. Simpson. 2018. Large-scale bleaching of corals on the Great Barrier Reef. Ecology 99:1455	N/A	Terry Hughes	terry.hughes@jcu.edu.au	AA	1	0.37	N/A	N/A	N/A	N/A	-11.275	144.025	1574	6480	11339280	2015-2016	2	0	20
AU_1149	AP	16	Far Northern GBR	52	Australia	Great Barrier Reef	U/N Reef, 11-127b	-11.2761	144.026	24	3	2016	N/A	1	1-10	5.5	-1	N/A	N/A	0	4/4/2016	0	7.11	7.11	8.95	0	N/A	Aerial survey	Terry Hughes	Hughes, T. P., J. T. Kerry, and T. Simpson. 2018. Large-scale bleaching of corals on the Great Barrier Reef. Ecology 99:1456	N/A	Terry Hughes	terry.hughes@jcu.edu.au	AA	1	0.37	N/A	N/A	N/A	N/A	-11.275	144.025	1574	6480	11339280	2015-2016	1	0	5.5
AU_1150	AP	16	Far Northern GBR	52	Australia	Great Barrier Reef	U/N Reef, 11-128	-11.2793	144.034	24	3	2016	N/A	1	1-10	5.5	-1	N/A	N/A	0	4/4/2016	0	7.11	7.11	8.95	0	N/A	Aerial survey	Terry Hughes	Hughes, T. P., J. T. Kerry, and T. Simpson. 2018. Large-scale bleaching of corals on the Great Barrier Reef. Ecology 99:1457	N/A	Terry Hughes	terry.hughes@jcu.edu.au	AA	1	0.37	N/A	N/A	N/A	N/A	-11.275	144.025	1574	6480	11339280	2015-2016	1	0	5.5
AU_1151	AP	16	Far Northern GBR	52	Australia	Great Barrier Reef	U/N Reef, 11-129	-11.2763	144.044	24	3	2016	N/A	1	1-10	5.5	-1	N/A	N/A	0	4/4/2016	0	7.11	7.11	8.95	0	N/A	Aerial survey	Terry Hughes	Hughes, T. P., J. T. Kerry, and T. Simpson. 2018. Large-scale bleaching of corals on the Great Barrier Reef. Ecology 99:1458	N/A	Terry Hughes	terry.hughes@jcu.edu.au	AA	1	0.37	N/A	N/A	N/A	N/A	-11.275	144.025	1574	6480	11339280	2015-2016	1	0	5.5
AU_1152	AP	16	Far Northern GBR	52	Australia	Great Barrier Reef	Cockburn Reef, 11-173	-11.8206	143.363	24	3	2016	N/A	3	>60	80.5	-1	N/A	N/A	0	3/31/2016	0	9.88	9.88	10.9	0	N/A	Aerial survey	Terry Hughes	Hughes, T. P., J. T. Kerry, and T. Simpson. 2018. Large-scale bleaching of corals on the Great Barrier Reef. Ecology 99:1459	N/A	Terry Hughes	terry.hughes@jcu.edu.au	AA	1	1.24	N/A	N/A	N/A	N/A	-11.825	143.375	1563	6467	11260067	2015-2016	3	0	80.5
AU_1153	AP	16	Far Northern GBR	52	Australia	Great Barrier Reef	Cockburn Patch, 11-178	-11.9111	143.338	24	3	2016	N/A	3	>60	80.5	-1	N/A	N/A	0	3/31/2016	0	9.7	9.7	10.5	0	N/A	Aerial survey	Terry Hughes	Hughes, T. P., J. T. Kerry, and T. Simpson. 2018. Large-scale bleaching of corals on the Great Barrier Reef. Ecology 99:1460	N/A	Terry Hughes	terry.hughes@jcu.edu.au	AA	1	0.93	N/A	N/A	N/A	N/A	-11.925	143.325	1561	6466	11245666	2015-2016	3	0	80.5
AU_1154	AP	16	Far Northern GBR	52	Australia	Great Barrier Reef	U/N Reef, 11-197	-11.5136	143.869	24	3	2016	N/A	1	1-10	5.5	-1	N/A	N/A	0	4/2/2016	0	7.09	7.09	8.67	0	N/A	Aerial survey	Terry Hughes	Hughes, T. P., J. T. Kerry, and T. Simpson. 2018. Large-scale bleaching of corals on the Great Barrier Reef. Ecology 99:1461	N/A	Terry Hughes	terry.hughes@jcu.edu.au	AA	1	0.44	N/A	N/A	N/A	N/A	-11.525	143.875	1569	6477	11303277	2015-2016	1	0	5.5
AU_1155	AP	16	Far Northern GBR	52	Australia	Great Barrier Reef	U/N Reef, 11-201	-11.5308	143.867	24	3	2016	N/A	0	<1	0	-1	N/A	N/A	0	4/2/2016	0	7.09	7.09	8.67	0	N/A	Aerial survey	Terry Hughes	Hughes, T. P., J. T. Kerry, and T. Simpson. 2018. Large-scale bleaching of corals on the Great Barrier Reef. Ecology 99:1462	N/A	Terry Hughes	terry.hughes@jcu.edu.au	AA	1	0.44	N/A	N/A	N/A	N/A	-11.525	143.875	1569	6477	11303277	2015-2016	0	0	0
AU_1156	AP	16	Far Northern GBR	52	Australia	Great Barrier Reef	U/N Reef, 11-202	-11.5268	143.878	24	3	2016	N/A	1	1-10	5.5	-1	N/A	N/A	0	4/2/2016	0	7.09	7.09	8.67	0	N/A	Aerial survey	Terry Hughes	Hughes, T. P., J. T. Kerry, and T. Simpson. 2018. Large-scale bleaching of corals on the Great Barrier Reef. Ecology 99:1463	N/A	Terry Hughes	terry.hughes@jcu.edu.au	AA	1	0.44	N/A	N/A	N/A	N/A	-11.525	143.875	1569	6477	11303277	2015-2016	1	0	5.5
AU_1157	AP	16	Far Northern GBR	52	Australia	Great Barrier Reef	U/N Reef, 11-203	-11.5399	143.856	24	3	2016	N/A	1	1-10	5.5	-1	N/A	N/A	0	4/2/2016	0	7.09	7.09	8.67	0	N/A	Aerial survey	Terry Hughes	Hughes, T. P., J. T. Kerry, and T. Simpson. 2018. Large-scale bleaching of corals on the Great Barrier Reef. Ecology 99:1464	N/A	Terry Hughes	terry.hughes@jcu.edu.au	AA	1	0.44	N/A	N/A	N/A	N/A	-11.525	143.875	1569	6477	11303277	2015-2016	1	0	5.5
AU_1158	AP	16	Far Northern GBR	52	Australia	Great Barrier Reef	U/N Reef, 11-204	-11.5504	143.865	24	3	2016	N/A	1	1-10	5.5	-1	N/A	N/A	0	4/2/2016	0	7.36	7.36	8.92	0	N/A	Aerial survey	Terry Hughes	Hughes, T. P., J. T. Kerry, and T. Simpson. 2018. Large-scale bleaching of corals on the Great Barrier Reef. Ecology 99:1465	N/A	Terry Hughes	terry.hughes@jcu.edu.au	AA	1	0.3	N/A	N/A	N/A	N/A	-11.575	143.875	1568	6477	11296077	2015-2016	1	0	5.5
AU_1159	AP	16	Far Northern GBR	52	Australia	Great Barrier Reef	U/N Reef, 11-208a	-11.5588	143.862	24	3	2016	N/A	2	10-30	20	-1	N/A	N/A	0	4/2/2016	0	7.36	7.36	8.92	0	N/A	Aerial survey	Terry Hughes	Hughes, T. P., J. T. Kerry, and T. Simpson. 2018. Large-scale bleaching of corals on the Great Barrier Reef. Ecology 99:1466	N/A	Terry Hughes	terry.hughes@jcu.edu.au	AA	1	0.3	N/A	N/A	N/A	N/A	-11.575	143.875	1568	6477	11296077	2015-2016	2	0	20
AU_1160	AP	16	Far Northern GBR	52	Australia	Great Barrier Reef	U/N Reef, 11-210a	-11.5697	143.869	24	3	2016	N/A	1	1-10	5.5	-1	N/A	N/A	0	4/2/2016	0	7.36	7.36	8.92	0	N/A	Aerial survey	Terry Hughes	Hughes, T. P., J. T. Kerry, and T. Simpson. 2018. Large-scale bleaching of corals on the Great Barrier Reef. Ecology 99:1467	N/A	Terry Hughes	terry.hughes@jcu.edu.au	AA	1	0.3	N/A	N/A	N/A	N/A	-11.575	143.875	1568	6477	11296077	2015-2016	1	0	5.5
AU_1161	AP	16	Far Northern GBR	52	Australia	Great Barrier Reef	Jukes Reef, 11-212	-11.5923	143.855	24	3	2016	N/A	2	10-30	20	-1	N/A	N/A	0	4/2/2016	0	7.36	7.36	8.92	0	N/A	Aerial survey	Terry Hughes	Hughes, T. P., J. T. Kerry, and T. Simpson. 2018. Large-scale bleaching of corals on the Great Barrier Reef. Ecology 99:1468	N/A	Terry Hughes	terry.hughes@jcu.edu.au	AA	1	0.3	N/A	N/A	N/A	N/A	-11.575	143.875	1568	6477	11296077	2015-2016	2	0	20
AU_1162	AP	16	Far Northern GBR	52	Australia	Great Barrier Reef	U/N Reef, 11-215	-11.6301	143.88	24	3	2016	N/A	2	10-30	20	-1	N/A	N/A	0	4/2/2016	0	7.73	7.73	9.3	0	N/A	Aerial survey	Terry Hughes	Hughes, T. P., J. T. Kerry, and T. Simpson. 2018. Large-scale bleaching of corals on the Great Barrier Reef. Ecology 99:1469	N/A	Terry Hughes	terry.hughes@jcu.edu.au	AA	1	0.31	N/A	N/A	N/A	N/A	-11.625	143.875	1567	6477	11288877	2015-2016	2	0	20
AU_1163	AP	16	Far Northern GBR	52	Australia	Great Barrier Reef	Middle Banks, 11-222a	-11.7643	143.505	24	3	2016	N/A	2	30-60	45	-1	N/A	N/A	0	3/31/2016	0	9.11	9.11	10	0	N/A	Aerial survey	Terry Hughes	Hughes, T. P., J. T. Kerry, and T. Simpson. 2018. Large-scale bleaching of corals on the Great Barrier Reef. Ecology 99:1470	N/A	Terry Hughes	terry.hughes@jcu.edu.au	AA	1	0.93	N/A	N/A	N/A	N/A	-11.775	143.525	1564	6470	11267270	2015-2016	2	0	45
AU_1164	AP	16	Far Northern GBR	52	Australia	Great Barrier Reef	Three Reefs, 11-223	-11.7694	143.895	24	3	2016	N/A	2	10-30	20	-1	N/A	N/A	0	4/2/2016	0	8.32	8.32	9.73	0	N/A	Aerial survey	Terry Hughes	Hughes, T. P., J. T. Kerry, and T. Simpson. 2018. Large-scale bleaching of corals on the Great Barrier Reef. Ecology 99:1472	N/A	Terry Hughes	terry.hughes@jcu.edu.au	AA	1	0.48	N/A	N/A	N/A	N/A	-11.775	143.875	1564	6477	11267277	2015-2016	2	0	20
AU_1165	AP	16	Far Northern GBR	52	Australia	Great Barrier Reef	U/N Reef, 11-224	-11.7813	143.869	24	3	2016	N/A	2	10-30	20	-1	N/A	N/A	0	4/2/2016	0	8.32	8.32	9.73	0	N/A	Aerial survey	Terry Hughes	Hughes, T. P., J. T. Kerry, and T. Simpson. 2018. Large-scale bleaching of corals on the Great Barrier Reef. Ecology 99:1473	N/A	Terry Hughes	terry.hughes@jcu.edu.au	AA	1	0.48	N/A	N/A	N/A	N/A	-11.775	143.875	1564	6477	11267277	2015-2016	2	0	20
AU_1166	AP	16	Far Northern GBR	52	Australia	Great Barrier Reef	U/N Reef, 11-225	-11.7911	143.87	24	3	2016	N/A	2	30-60	45	-1	N/A	N/A	0	4/2/2016	0	8.32	8.32	9.73	0	N/A	Aerial survey	Terry Hughes	Hughes, T. P., J. T. Kerry, and T. Simpson. 2018. Large-scale bleaching of corals on the Great Barrier Reef. Ecology 99:1474	N/A	Terry Hughes	terry.hughes@jcu.edu.au	AA	1	0.48	N/A	N/A	N/A	N/A	-11.775	143.875	1564	6477	11267277	2015-2016	2	0	45
AU_1167	AP	16	Far Northern GBR	52	Australia	Great Barrier Reef	U/N Reef, 11-226	-11.8008	143.864	24	3	2016	N/A	2	10-30	20	-1	N/A	N/A	0	4/2/2016	0	8.23	8.23	9.64	0	N/A	Aerial survey	Terry Hughes	Hughes, T. P., J. T. Kerry, and T. Simpson. 2018. Large-scale bleaching of corals on the Great Barrier Reef. Ecology 99:1475	N/A	Terry Hughes	terry.hughes@jcu.edu.au	AA	1	0.62	N/A	N/A	N/A	N/A	-11.825	143.875	1563	6477	11260077	2015-2016	2	0	20
AU_1168	AP	16	Far Northern GBR	52	Australia	Great Barrier Reef	U/N Reef, 11-227	-11.8086	143.865	24	3	2016	N/A	2	10-30	20	-1	N/A	N/A	0	4/2/2016	0	8.23	8.23	9.64	0	N/A	Aerial survey	Terry Hughes	Hughes, T. P., J. T. Kerry, and T. Simpson. 2018. Large-scale bleaching of corals on the Great Barrier Reef. Ecology 99:1476	N/A	Terry Hughes	terry.hughes@jcu.edu.au	AA	1	0.62	N/A	N/A	N/A	N/A	-11.825	143.875	1563	6477	11260077	2015-2016	2	0	20
AU_1169	AP	16	Far Northern GBR	52	Australia	Great Barrier Reef	Wood Reef, 11-228	-11.802	143.969	24	3	2016	N/A	3	>60	80.5	-1	N/A	N/A	0	4/4/2016	0	9.9	9.9	11.73	0	N/A	Aerial survey	Terry Hughes	Hughes, T. P., J. T. Kerry, and T. Simpson. 2018. Large-scale bleaching of corals on the Great Barrier Reef. Ecology 99:1477	N/A	Terry Hughes	terry.hughes@jcu.edu.au	AA	1	1.05	N/A	N/A	N/A	N/A	-11.825	143.975	1563	6479	11260079	2015-2016	3	0	80.5
AU_1170	AP	16	Far Northern GBR	52	Australia	Great Barrier Reef	Devlin Reef, 11-229a	-11.8258	143.856	24	3	2016	N/A	2	30-60	45	-1	N/A	N/A	0	4/2/2016	0	8.23	8.23	9.64	0	N/A	Aerial survey	Terry Hughes	Hughes, T. P., J. T. Kerry, and T. Simpson. 2018. Large-scale bleaching of corals on the Great Barrier Reef. Ecology 99:1478	N/A	Terry Hughes	terry.hughes@jcu.edu.au	AA	1	0.62	N/A	N/A	N/A	N/A	-11.825	143.875	1563	6477	11260077	2015-2016	2	0	45
AU_1171	AP	16	Far Northern GBR	52	Australia	Great Barrier Reef	U/N Reef, 11-229b	-11.8443	143.843	24	3	2016	N/A	2	30-60	45	-1	N/A	N/A	0	4/2/2016	0	7.96	7.96	9.03	0	N/A	Aerial survey	Terry Hughes	Hughes, T. P., J. T. Kerry, and T. Simpson. 2018. Large-scale bleaching of corals on the Great Barrier Reef. Ecology 99:1479	N/A	Terry Hughes	terry.hughes@jcu.edu.au	AA	1	0.46	N/A	N/A	N/A	N/A	-11.825	143.825	1563	6476	11260076	2015-2016	2	0	45
AU_1172	AP	16	Far Northern GBR	52	Australia	Great Barrier Reef	U/N Reef, 11-230	-11.8544	143.824	24	3	2016	N/A	1	1-10	5.5	-1	N/A	N/A	0	3/30/2016	0	7.99	7.99	8.92	0	N/A	Aerial survey	Terry Hughes	Hughes, T. P., J. T. Kerry, and T. Simpson. 2018. Large-scale bleaching of corals on the Great Barrier Reef. Ecology 99:1480	N/A	Terry Hughes	terry.hughes@jcu.edu.au	AA	1	0.45	N/A	N/A	N/A	N/A	-11.875	143.825	1562	6476	11252876	2015-2016	1	0	5.5
AU_1173	AP	16	Far Northern GBR	52	Australia	Great Barrier Reef	U/N Reef, 11-231	-11.86	143.829	24	3	2016	N/A	1	1-10	5.5	-1	N/A	N/A	0	3/30/2016	0	7.99	7.99	8.92	0	N/A	Aerial survey	Terry Hughes	Hughes, T. P., J. T. Kerry, and T. Simpson. 2018. Large-scale bleaching of corals on the Great Barrier Reef. Ecology 99:1481	N/A	Terry Hughes	terry.hughes@jcu.edu.au	AA	1	0.45	N/A	N/A	N/A	N/A	-11.875	143.825	1562	6476	11252876	2015-2016	1	0	5.5
AU_1174	AP	16	Far Northern GBR	52	Australia	Great Barrier Reef	Great Detached Reef (No 3), 11-244c	-11.7842	143.998	24	3	2016	N/A	2	10-30	20	-1	N/A	N/A	0	4/2/2016	0	9.88	9.88	11.39	0	N/A	Aerial survey	Terry Hughes	Hughes, T. P., J. T. Kerry, and T. Simpson. 2018. Large-scale bleaching of corals on the Great Barrier Reef. Ecology 99:1482	N/A	Terry Hughes	terry.hughes@jcu.edu.au	AA	1	1.02	N/A	N/A	N/A	N/A	-11.775	143.975	1564	6479	11267279	2015-2016	2	0	20
AU_1175	AP	16	Far Northern GBR	52	Australia	Great Barrier Reef	U/N Reef, 11-272	-11.8453	143.826	24	3	2016	N/A	1	1-10	5.5	-1	N/A	N/A	0	4/2/2016	0	7.96	7.96	9.03	0	N/A	Aerial survey	Terry Hughes	Hughes, T. P., J. T. Kerry, and T. Simpson. 2018. Large-scale bleaching of corals on the Great Barrier Reef. Ecology 99:1483	N/A	Terry Hughes	terry.hughes@jcu.edu.au	AA	1	0.46	N/A	N/A	N/A	N/A	-11.825	143.825	1563	6476	11260076	2015-2016	1	0	5.5
AU_1176	AP	16	Far Northern GBR	52	Australia	Great Barrier Reef	U/N Reef, 12-022	-12.3635	143.216	24	3	2016	N/A	3	>60	80.5	-1	N/A	N/A	0	3/30/2016	0	10.5	10.5	10.97	0	N/A	Aerial survey	Terry Hughes	Hughes, T. P., J. T. Kerry, and T. Simpson. 2018. Large-scale bleaching of corals on the Great Barrier Reef. Ecology 99:1484	N/A	Terry Hughes	terry.hughes@jcu.edu.au	AA	1	0.87	N/A	N/A	N/A	N/A	-12.375	143.225	1552	6464	11180864	2015-2016	3	0	80.5
AU_1177	AP	16	Far Northern GBR	52	Australia	Great Barrier Reef	Albany Island Reef (No 1), 10-318a	-10.7153	142.593	25	3	2016	N/A	3	>60	80.5	-1	N/A	N/A	0	4/2/2016	0	8.37	8.37	9.85	0	N/A	Aerial survey	Terry Hughes	Hughes, T. P., J. T. Kerry, and T. Simpson. 2018. Large-scale bleaching of corals on the Great Barrier Reef. Ecology 99:1485	N/A	Terry Hughes	terry.hughes@jcu.edu.au	AA	1	0.6	N/A	N/A	N/A	N/A	-10.725	142.575	1585	6451	11418451	2015-2016	3	0	80.5
AU_1178	AP	16	Far Northern GBR	52	Australia	Great Barrier Reef	Albany Island Reef (No 2), 10-318b	-10.7283	142.618	25	3	2016	N/A	3	>60	80.5	-1	N/A	N/A	0	4/2/2016	0	8.68	8.68	10.16	0	N/A	Aerial survey	Terry Hughes	Hughes, T. P., J. T. Kerry, and T. Simpson. 2018. Large-scale bleaching of corals on the Great Barrier Reef. Ecology 99:1486	N/A	Terry Hughes	terry.hughes@jcu.edu.au	AA	1	0.6	N/A	N/A	N/A	N/A	-10.725	142.625	1585	6452	11418452	2015-2016	3	0	80.5
AU_1179	AP	16	Far Northern GBR	52	Australia	Great Barrier Reef	Albany Island Reef (No 3), 10-318c	-10.7466	142.623	25	3	2016	N/A	3	>60	80.5	-1	N/A	N/A	0	4/2/2016	0	8.68	8.68	10.16	0	N/A	Aerial survey	Terry Hughes	Hughes, T. P., J. T. Kerry, and T. Simpson. 2018. Large-scale bleaching of corals on the Great Barrier Reef. Ecology 99:1487	N/A	Terry Hughes	terry.hughes@jcu.edu.au	AA	1	0.6	N/A	N/A	N/A	N/A	-10.725	142.625	1585	6452	11418452	2015-2016	3	0	80.5
AU_1180	AP	16	Far Northern GBR	52	Australia	Great Barrier Reef	Mai Reef, 10-320	-10.724	142.625	25	3	2016	N/A	3	>60	80.5	-1	N/A	N/A	0	4/2/2016	0	8.68	8.68	10.16	0	N/A	Aerial survey	Terry Hughes	Hughes, T. P., J. T. Kerry, and T. Simpson. 2018. Large-scale bleaching of corals on the Great Barrier Reef. Ecology 99:1488	N/A	Terry Hughes	terry.hughes@jcu.edu.au	AA	1	0.6	N/A	N/A	N/A	N/A	-10.725	142.625	1585	6452	11418452	2015-2016	3	0	80.5
AU_1181	AP	16	Far Northern GBR	52	Australia	Great Barrier Reef	Harrington Reef, 10-335	-10.8213	142.723	25	3	2016	N/A	3	>60	80.5	-1	N/A	N/A	0	4/2/2016	0	9.57	9.57	11.05	0	N/A	Aerial survey	Terry Hughes	Hughes, T. P., J. T. Kerry, and T. Simpson. 2018. Large-scale bleaching of corals on the Great Barrier Reef. Ecology 99:1489	N/A	Terry Hughes	terry.hughes@jcu.edu.au	AA	1	0.3	N/A	N/A	N/A	N/A	-10.825	142.725	1583	6454	11404054	2015-2016	3	0	80.5
AU_1182	AP	16	Far Northern GBR	52	Australia	Great Barrier Reef	Wyborn Reef, 10-336	-10.821	142.762	25	3	2016	N/A	3	>60	80.5	-1	N/A	N/A	0	4/3/2016	0	9.68	9.68	11.3	0	N/A	Aerial survey	Terry Hughes	Hughes, T. P., J. T. Kerry, and T. Simpson. 2018. Large-scale bleaching of corals on the Great Barrier Reef. Ecology 99:1490	N/A	Terry Hughes	terry.hughes@jcu.edu.au	AA	1	0.29	N/A	N/A	N/A	N/A	-10.825	142.775	1583	6455	11404055	2015-2016	3	0	80.5
AU_1183	AP	16	Far Northern GBR	52	Australia	Great Barrier Reef	Shortland Reef, 10-341	-10.9013	142.773	25	3	2016	N/A	3	>60	80.5	-1	N/A	N/A	0	4/2/2016	0	9.9	9.9	11.43	0	N/A	Aerial survey	Terry Hughes	Hughes, T. P., J. T. Kerry, and T. Simpson. 2018. Large-scale bleaching of corals on the Great Barrier Reef. Ecology 99:1491	N/A	Terry Hughes	terry.hughes@jcu.edu.au	AA	1	0.3	N/A	N/A	N/A	N/A	-10.925	142.775	1581	6455	11389655	2015-2016	3	0	80.5
AU_1184	AP	16	Far Northern GBR	52	Australia	Great Barrier Reef	U/N Reef, 10-429	-10.7222	142.566	25	3	2016	N/A	3	>60	80.5	-1	N/A	N/A	0	4/2/2016	0	8.37	8.37	9.85	0	N/A	Aerial survey	Terry Hughes	Hughes, T. P., J. T. Kerry, and T. Simpson. 2018. Large-scale bleaching of corals on the Great Barrier Reef. Ecology 99:1492	N/A	Terry Hughes	terry.hughes@jcu.edu.au	AA	1	0.6	N/A	N/A	N/A	N/A	-10.725	142.575	1585	6451	11418451	2015-2016	3	0	80.5
AU_1185	AP	16	Far Northern GBR	52	Australia	Great Barrier Reef	U/N Reef, 10-430	-10.7299	142.577	25	3	2016	N/A	3	>60	80.5	-1	N/A	N/A	0	4/2/2016	0	8.37	8.37	9.85	0	N/A	Aerial survey	Terry Hughes	Hughes, T. P., J. T. Kerry, and T. Simpson. 2018. Large-scale bleaching of corals on the Great Barrier Reef. Ecology 99:1493	N/A	Terry Hughes	terry.hughes@jcu.edu.au	AA	1	0.6	N/A	N/A	N/A	N/A	-10.725	142.575	1585	6451	11418451	2015-2016	3	0	80.5
AU_1186	AP	16	Far Northern GBR	52	Australia	Great Barrier Reef	Arnold Reef, 11-001	-11.0068	142.993	25	3	2016	N/A	3	>60	80.5	-1	N/A	N/A	0	4/2/2016	0	10.59	10.59	12.06	0	N/A	Aerial survey	Terry Hughes	Hughes, T. P., J. T. Kerry, and T. Simpson. 2018. Large-scale bleaching of corals on the Great Barrier Reef. Ecology 99:1494	N/A	Terry Hughes	terry.hughes@jcu.edu.au	AA	1	0.31	N/A	N/A	N/A	N/A	-11.025	142.975	1579	6459	11375259	2015-2016	3	0	80.5
AU_1187	AP	16	Far Northern GBR	52	Australia	Great Barrier Reef	U/N Reef, 11-025	-11.07	143.091	25	3	2016	N/A	3	>60	80.5	-1	N/A	N/A	0	4/2/2016	0	11.02	11.02	12.45	0	N/A	Aerial survey	Terry Hughes	Hughes, T. P., J. T. Kerry, and T. Simpson. 2018. Large-scale bleaching of corals on the Great Barrier Reef. Ecology 99:1495	N/A	Terry Hughes	terry.hughes@jcu.edu.au	AA	1	0.31	N/A	N/A	N/A	N/A	-11.075	143.075	1578	6461	11368061	2015-2016	3	0	80.5
AU_1188	AP	16	Far Northern GBR	52	Australia	Great Barrier Reef	Sinclair Reef, 11-026	-11.1166	143.028	25	3	2016	N/A	3	>60	80.5	-1	N/A	N/A	0	4/2/2016	0	10.91	10.91	12.35	0	N/A	Aerial survey	Terry Hughes	Hughes, T. P., J. T. Kerry, and T. Simpson. 2018. Large-scale bleaching of corals on the Great Barrier Reef. Ecology 99:1496	N/A	Terry Hughes	terry.hughes@jcu.edu.au	AA	1	0.31	N/A	N/A	N/A	N/A	-11.125	143.025	1577	6460	11360860	2015-2016	3	0	80.5
AU_1189	AP	16	Far Northern GBR	52	Australia	Great Barrier Reef	Milman-Aplin Reef, 11-035	-11.1821	143.031	25	3	2016	N/A	3	>60	80.5	-1	N/A	N/A	0	4/2/2016	0	11.04	11.04	12.48	0	N/A	Aerial survey	Terry Hughes	Hughes, T. P., J. T. Kerry, and T. Simpson. 2018. Large-scale bleaching of corals on the Great Barrier Reef. Ecology 99:1497	N/A	Terry Hughes	terry.hughes@jcu.edu.au	AA	1	0.46	N/A	N/A	N/A	N/A	-11.175	143.025	1576	6460	11353660	2015-2016	3	0	80.5
AU_1190	AP	16	Far Northern GBR	52	Australia	Great Barrier Reef	Douglas Islet Reef, 11-038	-11.2432	143.001	25	3	2016	N/A	3	>60	80.5	-1	N/A	N/A	0	4/2/2016	0	11.08	11.08	12.53	0	N/A	Aerial survey	Terry Hughes	Hughes, T. P., J. T. Kerry, and T. Simpson. 2018. Large-scale bleaching of corals on the Great Barrier Reef. Ecology 99:1498	N/A	Terry Hughes	terry.hughes@jcu.edu.au	AA	1	0.46	N/A	N/A	N/A	N/A	-11.225	143.025	1575	6460	11346460	2015-2016	3	0	80.5
AU_1191	AP	16	Far Northern GBR	52	Australia	Great Barrier Reef	Cholmondeley Reef, 11-052	-11.3896	143.07	25	3	2016	N/A	3	>60	80.5	-1	N/A	N/A	0	4/2/2016	0	10.65	10.65	12.22	0	N/A	Aerial survey	Terry Hughes	Hughes, T. P., J. T. Kerry, and T. Simpson. 2018. Large-scale bleaching of corals on the Great Barrier Reef. Ecology 99:1499	N/A	Terry Hughes	terry.hughes@jcu.edu.au	AA	1	0.61	N/A	N/A	N/A	N/A	-11.375	143.075	1572	6461	11324861	2015-2016	3	0	80.5
AU_1192	AP	16	Far Northern GBR	52	Australia	Great Barrier Reef	Jardine Reef, 11-053	-11.3852	143.035	25	3	2016	N/A	3	>60	80.5	-1	N/A	N/A	0	4/2/2016	0	10.63	10.63	12.22	0	N/A	Aerial survey	Terry Hughes	Hughes, T. P., J. T. Kerry, and T. Simpson. 2018. Large-scale bleaching of corals on the Great Barrier Reef. Ecology 99:1500	N/A	Terry Hughes	terry.hughes@jcu.edu.au	AA	1	0.62	N/A	N/A	N/A	N/A	-11.375	143.025	1572	6460	11324860	2015-2016	3	0	80.5
AU_1193	AP	16	Far Northern GBR	52	Australia	Great Barrier Reef	Wallace Islet Reef, 11-055	-11.4539	143.042	25	3	2016	N/A	3	>60	80.5	-1	N/A	N/A	0	4/2/2016	0	10.03	10.03	11.57	0	N/A	Aerial survey	Terry Hughes	Hughes, T. P., J. T. Kerry, and T. Simpson. 2018. Large-scale bleaching of corals on the Great Barrier Reef. Ecology 99:1501	N/A	Terry Hughes	terry.hughes@jcu.edu.au	AA	1	0.62	N/A	N/A	N/A	N/A	-11.475	143.025	1570	6460	11310460	2015-2016	3	0	80.5
AU_1194	AP	16	Far Northern GBR	52	Australia	Great Barrier Reef	Little Boydong Reef, 11-061	-11.4888	143.041	25	3	2016	N/A	3	>60	80.5	-1	N/A	N/A	0	4/2/2016	0	10.03	10.03	11.57	0	N/A	Aerial survey	Terry Hughes	Hughes, T. P., J. T. Kerry, and T. Simpson. 2018. Large-scale bleaching of corals on the Great Barrier Reef. Ecology 99:1502	N/A	Terry Hughes	terry.hughes@jcu.edu.au	AA	1	0.62	N/A	N/A	N/A	N/A	-11.475	143.025	1570	6460	11310460	2015-2016	3	0	80.5
AU_1195	AP	16	Far Northern GBR	52	Australia	Great Barrier Reef	Boydong Island Reef, 11-062	-11.498	143.029	25	3	2016	N/A	3	>60	80.5	-1	N/A	N/A	0	4/2/2016	0	10.03	10.03	11.57	0	N/A	Aerial survey	Terry Hughes	Hughes, T. P., J. T. Kerry, and T. Simpson. 2018. Large-scale bleaching of corals on the Great Barrier Reef. Ecology 99:1503	N/A	Terry Hughes	terry.hughes@jcu.edu.au	AA	1	0.62	N/A	N/A	N/A	N/A	-11.475	143.025	1570	6460	11310460	2015-2016	3	0	80.5
AU_1196	AP	16	Far Northern GBR	52	Australia	Great Barrier Reef	Pirie Reef, 11-134	-11.5904	142.898	25	3	2016	N/A	3	>60	80.5	-1	N/A	N/A	0	4/2/2016	0	9.84	9.84	11.36	0	N/A	Aerial survey	Terry Hughes	Hughes, T. P., J. T. Kerry, and T. Simpson. 2018. Large-scale bleaching of corals on the Great Barrier Reef. Ecology 99:1504	N/A	Terry Hughes	terry.hughes@jcu.edu.au	AA	1	0.97	N/A	N/A	N/A	N/A	-11.575	142.875	1568	6457	11296057	2015-2016	3	0	80.5
AU_1197	AP	16	Far Northern GBR	52	Australia	Great Barrier Reef	Hannibal Islands Reef, 11-136	-11.5976	142.94	25	3	2016	N/A	3	>60	80.5	-1	N/A	N/A	0	4/2/2016	0	9.97	9.97	11.48	0	N/A	Aerial survey	Terry Hughes	Hughes, T. P., J. T. Kerry, and T. Simpson. 2018. Large-scale bleaching of corals on the Great Barrier Reef. Ecology 99:1505	N/A	Terry Hughes	terry.hughes@jcu.edu.au	AA	1	0.66	N/A	N/A	N/A	N/A	-11.575	142.925	1568	6458	11296058	2015-2016	3	0	80.5
AU_1198	AP	16	Far Northern GBR	52	Australia	Great Barrier Reef	U/N Reef, 11-137	-11.6514	142.907	25	3	2016	N/A	3	>60	80.5	-1	N/A	N/A	0	4/2/2016	0	10.14	10.14	11.55	0	N/A	Aerial survey	Terry Hughes	Hughes, T. P., J. T. Kerry, and T. Simpson. 2018. Large-scale bleaching of corals on the Great Barrier Reef. Ecology 99:1506	N/A	Terry Hughes	terry.hughes@jcu.edu.au	AA	1	0.51	N/A	N/A	N/A	N/A	-11.675	142.925	1566	6458	11281658	2015-2016	3	0	80.5
AU_1199	AP	16	Far Northern GBR	52	Australia	Great Barrier Reef	MacArthur Islands Reef, 11-138	-11.7318	142.986	25	3	2016	N/A	3	>60	80.5	-1	N/A	N/A	0	3/31/2016	0	10.08	10.08	11.16	0	N/A	Aerial survey	Terry Hughes	Hughes, T. P., J. T. Kerry, and T. Simpson. 2018. Large-scale bleaching of corals on the Great Barrier Reef. Ecology 99:1507	N/A	Terry Hughes	terry.hughes@jcu.edu.au	AA	1	0.5	N/A	N/A	N/A	N/A	-11.725	142.975	1565	6459	11274459	2015-2016	3	0	80.5
AU_1200	AP	16	Far Northern GBR	52	Australia	Great Barrier Reef	U/N Reef, 11-139	-11.7595	142.973	25	3	2016	N/A	3	>60	80.5	-1	N/A	N/A	0	3/31/2016	0	10.3	10.3	11.37	0	N/A	Aerial survey	Terry Hughes	Hughes, T. P., J. T. Kerry, and T. Simpson. 2018. Large-scale bleaching of corals on the Great Barrier Reef. Ecology 99:1508	N/A	Terry Hughes	terry.hughes@jcu.edu.au	AA	1	0.49	N/A	N/A	N/A	N/A	-11.775	142.975	1564	6459	11267259	2015-2016	3	0	80.5
AU_1201	AP	16	Far Northern GBR	52	Australia	Great Barrier Reef	U/N Reef, 11-140	-11.7624	142.896	25	3	2016	N/A	3	>60	80.5	-1	N/A	N/A	0	3/31/2016	0	10.33	10.33	11.42	0	N/A	Aerial survey	Terry Hughes	Hughes, T. P., J. T. Kerry, and T. Simpson. 2018. Large-scale bleaching of corals on the Great Barrier Reef. Ecology 99:1509	N/A	Terry Hughes	terry.hughes@jcu.edu.au	AA	1	0.63	N/A	N/A	N/A	N/A	-11.775	142.875	1564	6457	11267257	2015-2016	3	0	80.5
AU_1202	AP	16	Far Northern GBR	52	Australia	Great Barrier Reef	U/N Reef, 11-141	-11.7697	142.916	25	3	2016	N/A	3	>60	80.5	-1	N/A	N/A	0	3/31/2016	0	10.29	10.29	11.37	0	N/A	Aerial survey	Terry Hughes	Hughes, T. P., J. T. Kerry, and T. Simpson. 2018. Large-scale bleaching of corals on the Great Barrier Reef. Ecology 99:1510	N/A	Terry Hughes	terry.hughes@jcu.edu.au	AA	1	0.49	N/A	N/A	N/A	N/A	-11.775	142.925	1564	6458	11267258	2015-2016	3	0	80.5
AU_1203	AP	16	Far Northern GBR	52	Australia	Great Barrier Reef	U/N Reef, 11-142	-11.7719	142.936	25	3	2016	N/A	3	>60	80.5	-1	N/A	N/A	0	3/31/2016	0	10.29	10.29	11.37	0	N/A	Aerial survey	Terry Hughes	Hughes, T. P., J. T. Kerry, and T. Simpson. 2018. Large-scale bleaching of corals on the Great Barrier Reef. Ecology 99:1511	N/A	Terry Hughes	terry.hughes@jcu.edu.au	AA	1	0.49	N/A	N/A	N/A	N/A	-11.775	142.925	1564	6458	11267258	2015-2016	3	0	80.5
AU_1204	AP	16	Far Northern GBR	52	Australia	Great Barrier Reef	U/N Reef, 11-143	-11.7707	142.955	25	3	2016	N/A	3	>60	80.5	-1	N/A	N/A	0	3/31/2016	0	10.3	10.3	11.37	0	N/A	Aerial survey	Terry Hughes	Hughes, T. P., J. T. Kerry, and T. Simpson. 2018. Large-scale bleaching of corals on the Great Barrier Reef. Ecology 99:1512	N/A	Terry Hughes	terry.hughes@jcu.edu.au	AA	1	0.49	N/A	N/A	N/A	N/A	-11.775	142.975	1564	6459	11267259	2015-2016	3	0	80.5
AU_1205	AP	16	Far Northern GBR	52	Australia	Great Barrier Reef	U/N Reef, 11-147	-11.8053	142.9	25	3	2016	N/A	3	>60	80.5	-1	N/A	N/A	0	3/31/2016	0	10.31	10.31	11.39	0	N/A	Aerial survey	Terry Hughes	Hughes, T. P., J. T. Kerry, and T. Simpson. 2018. Large-scale bleaching of corals on the Great Barrier Reef. Ecology 99:1513	N/A	Terry Hughes	terry.hughes@jcu.edu.au	AA	1	0.47	N/A	N/A	N/A	N/A	-11.825	142.925	1563	6458	11260058	2015-2016	3	0	80.5
AU_1206	AP	16	Far Northern GBR	52	Australia	Great Barrier Reef	U/N Reef, 11-150	-11.8431	142.939	25	3	2016	N/A	3	>60	80.5	-1	N/A	N/A	0	3/31/2016	0	10.31	10.31	11.39	0	N/A	Aerial survey	Terry Hughes	Hughes, T. P., J. T. Kerry, and T. Simpson. 2018. Large-scale bleaching of corals on the Great Barrier Reef. Ecology 99:1514	N/A	Terry Hughes	terry.hughes@jcu.edu.au	AA	1	0.47	N/A	N/A	N/A	N/A	-11.825	142.925	1563	6458	11260058	2015-2016	3	0	80.5
AU_1207	AP	16	Far Northern GBR	52	Australia	Great Barrier Reef	U/N Reef, 11-151	-11.8619	142.994	25	3	2016	N/A	3	>60	80.5	-1	N/A	N/A	0	3/31/2016	0	10.59	10.59	11.66	0	N/A	Aerial survey	Terry Hughes	Hughes, T. P., J. T. Kerry, and T. Simpson. 2018. Large-scale bleaching of corals on the Great Barrier Reef. Ecology 99:1515	N/A	Terry Hughes	terry.hughes@jcu.edu.au	AA	1	0.47	N/A	N/A	N/A	N/A	-11.875	142.975	1562	6459	11252859	2015-2016	3	0	80.5
AU_1208	AP	16	Far Northern GBR	52	Australia	Great Barrier Reef	Wizard Reef, 11-156	-11.55	143.017	25	3	2016	N/A	3	>60	80.5	-1	N/A	N/A	0	4/2/2016	0	10.01	10.01	11.46	0	N/A	Aerial survey	Terry Hughes	Hughes, T. P., J. T. Kerry, and T. Simpson. 2018. Large-scale bleaching of corals on the Great Barrier Reef. Ecology 99:1516	N/A	Terry Hughes	terry.hughes@jcu.edu.au	AA	1	0.5	N/A	N/A	N/A	N/A	-11.575	143.025	1568	6460	11296060	2015-2016	3	0	80.5
AU_1209	AP	16	Far Northern GBR	52	Australia	Great Barrier Reef	Viking Reef, 11-161	-11.5942	143.01	25	3	2016	N/A	3	>60	80.5	-1	N/A	N/A	0	4/2/2016	0	10.01	10.01	11.46	0	N/A	Aerial survey	Terry Hughes	Hughes, T. P., J. T. Kerry, and T. Simpson. 2018. Large-scale bleaching of corals on the Great Barrier Reef. Ecology 99:1517	N/A	Terry Hughes	terry.hughes@jcu.edu.au	AA	1	0.5	N/A	N/A	N/A	N/A	-11.575	143.025	1568	6460	11296060	2015-2016	3	0	80.5
AU_1210	AP	16	Far Northern GBR	52	Australia	Great Barrier Reef	Rodney Reef, 11-176	-11.8949	143.107	25	3	2016	N/A	3	>60	80.5	-1	N/A	N/A	0	3/31/2016	0	10.35	10.35	11.18	0	N/A	Aerial survey	Terry Hughes	Hughes, T. P., J. T. Kerry, and T. Simpson. 2018. Large-scale bleaching of corals on the Great Barrier Reef. Ecology 99:1518	N/A	Terry Hughes	terry.hughes@jcu.edu.au	AA	1	0.52	N/A	N/A	N/A	N/A	-11.875	143.125	1562	6462	11252862	2015-2016	3	0	80.5
AU_1211	AP	16	Far Northern GBR	52	Australia	Great Barrier Reef	U/N Reef, 11-177	-11.9063	143.129	25	3	2016	N/A	3	>60	80.5	-1	N/A	N/A	0	3/31/2016	0	10.51	10.51	11.31	0	N/A	Aerial survey	Terry Hughes	Hughes, T. P., J. T. Kerry, and T. Simpson. 2018. Large-scale bleaching of corals on the Great Barrier Reef. Ecology 99:1519	N/A	Terry Hughes	terry.hughes@jcu.edu.au	AA	1	0.52	N/A	N/A	N/A	N/A	-11.925	143.125	1561	6462	11245662	2015-2016	3	0	80.5
AU_1212	AP	16	Far Northern GBR	52	Australia	Great Barrier Reef	Sunday Reef, 11-181	-11.9271	143.208	25	3	2016	N/A	3	>60	80.5	-1	N/A	N/A	0	3/31/2016	0	10.41	10.41	10.88	0	N/A	Aerial survey	Terry Hughes	Hughes, T. P., J. T. Kerry, and T. Simpson. 2018. Large-scale bleaching of corals on the Great Barrier Reef. Ecology 99:1520	N/A	Terry Hughes	terry.hughes@jcu.edu.au	AA	1	0.71	N/A	N/A	N/A	N/A	-11.925	143.225	1561	6464	11245664	2015-2016	3	0	80.5
AU_1213	AP	16	Far Northern GBR	52	Australia	Great Barrier Reef	Perry Reef, 11-189	-11.9714	143.255	25	3	2016	N/A	3	>60	80.5	-1	N/A	N/A	0	3/31/2016	0	10.01	10.01	10.48	0	N/A	Aerial survey	Terry Hughes	Hughes, T. P., J. T. Kerry, and T. Simpson. 2018. Large-scale bleaching of corals on the Great Barrier Reef. Ecology 99:1521	N/A	Terry Hughes	terry.hughes@jcu.edu.au	AA	1	0.74	N/A	N/A	N/A	N/A	-11.975	143.275	1560	6465	11238465	2015-2016	3	0	80.5
AU_1214	AP	16	Far Northern GBR	52	Australia	Great Barrier Reef	Cape Grenville Reef (No 1), 11-190a	-11.9591	143.234	25	3	2016	N/A	3	>60	80.5	-1	N/A	N/A	0	3/31/2016	0	10.46	10.46	10.93	0	N/A	Aerial survey	Terry Hughes	Hughes, T. P., J. T. Kerry, and T. Simpson. 2018. Large-scale bleaching of corals on the Great Barrier Reef. Ecology 99:1522	N/A	Terry Hughes	terry.hughes@jcu.edu.au	AA	1	0.72	N/A	N/A	N/A	N/A	-11.975	143.225	1560	6464	11238464	2015-2016	3	0	80.5
AU_1215	AP	16	Far Northern GBR	52	Australia	Great Barrier Reef	Cape Grenville Reef (No 2), 11-190b	-11.9717	143.244	25	3	2016	N/A	3	>60	80.5	-1	N/A	N/A	0	3/31/2016	0	10.46	10.46	10.93	0	N/A	Aerial survey	Terry Hughes	Hughes, T. P., J. T. Kerry, and T. Simpson. 2018. Large-scale bleaching of corals on the Great Barrier Reef. Ecology 99:1523	N/A	Terry Hughes	terry.hughes@jcu.edu.au	AA	1	0.72	N/A	N/A	N/A	N/A	-11.975	143.225	1560	6464	11238464	2015-2016	3	0	80.5
AU_1216	AP	16	Far Northern GBR	52	Australia	Great Barrier Reef	Gore Reef, 11-194	-11.9902	143.248	25	3	2016	N/A	3	>60	80.5	-1	N/A	N/A	0	3/31/2016	0	10.46	10.46	10.93	0	N/A	Aerial survey	Terry Hughes	Hughes, T. P., J. T. Kerry, and T. Simpson. 2018. Large-scale bleaching of corals on the Great Barrier Reef. Ecology 99:1524	N/A	Terry Hughes	terry.hughes@jcu.edu.au	AA	1	0.72	N/A	N/A	N/A	N/A	-11.975	143.225	1560	6464	11238464	2015-2016	3	0	80.5
AU_1217	AP	16	Far Northern GBR	52	Australia	Great Barrier Reef	Moody Reef, 12-004	-12.0992	143.265	25	3	2016	N/A	3	>60	80.5	-1	N/A	N/A	0	3/31/2016	0	9.88	9.88	10.37	0	N/A	Aerial survey	Terry Hughes	Hughes, T. P., J. T. Kerry, and T. Simpson. 2018. Large-scale bleaching of corals on the Great Barrier Reef. Ecology 99:1525	N/A	Terry Hughes	terry.hughes@jcu.edu.au	AA	1	0.73	N/A	N/A	N/A	N/A	-12.075	143.275	1558	6465	11224065	2015-2016	3	0	80.5
AU_1218	AP	16	Far Northern GBR	52	Australia	Great Barrier Reef	Laurel Reef, 12-006	-12.1395	143.276	25	3	2016	N/A	3	>60	80.5	-1	N/A	N/A	0	3/31/2016	0	10.31	10.31	10.8	0	N/A	Aerial survey	Terry Hughes	Hughes, T. P., J. T. Kerry, and T. Simpson. 2018. Large-scale bleaching of corals on the Great Barrier Reef. Ecology 99:1526	N/A	Terry Hughes	terry.hughes@jcu.edu.au	AA	1	0.72	N/A	N/A	N/A	N/A	-12.125	143.275	1557	6465	11216865	2015-2016	3	0	80.5
AU_1219	AP	16	Far Northern GBR	52	Australia	Great Barrier Reef	Kay Reef, 12-010	-12.2315	143.286	25	3	2016	N/A	3	>60	80.5	-1	N/A	N/A	0	3/31/2016	0	10.25	10.25	10.71	0	N/A	Aerial survey	Terry Hughes	Hughes, T. P., J. T. Kerry, and T. Simpson. 2018. Large-scale bleaching of corals on the Great Barrier Reef. Ecology 99:1527	N/A	Terry Hughes	terry.hughes@jcu.edu.au	AA	1	0.7	N/A	N/A	N/A	N/A	-12.225	143.275	1555	6465	11202465	2015-2016	3	0	80.5
AU_1220	AP	16	Far Northern GBR	52	Australia	Great Barrier Reef	Beesley-Baird Reef, 12-011	-12.2426	143.206	25	3	2016	N/A	3	>60	80.5	-1	N/A	N/A	0	3/31/2016	0	10.38	10.38	10.85	0	N/A	Aerial survey	Terry Hughes	Hughes, T. P., J. T. Kerry, and T. Simpson. 2018. Large-scale bleaching of corals on the Great Barrier Reef. Ecology 99:1528	N/A	Terry Hughes	terry.hughes@jcu.edu.au	AA	1	0.54	N/A	N/A	N/A	N/A	-12.225	143.225	1555	6464	11202464	2015-2016	3	0	80.5
AU_1221	AP	16	Far Northern GBR	52	Australia	Great Barrier Reef	Piper Reef, 12-012	-12.2504	143.238	25	3	2016	N/A	3	>60	80.5	-1	N/A	N/A	0	3/31/2016	0	10.41	10.41	10.86	0	N/A	Aerial survey	Terry Hughes	Hughes, T. P., J. T. Kerry, and T. Simpson. 2018. Large-scale bleaching of corals on the Great Barrier Reef. Ecology 99:1529	N/A	Terry Hughes	terry.hughes@jcu.edu.au	AA	1	0.69	N/A	N/A	N/A	N/A	-12.275	143.225	1554	6464	11195264	2015-2016	3	0	80.5
AU_1222	AP	16	Far Northern GBR	52	Australia	Great Barrier Reef	Inset Reef, 12-013	-12.2473	143.275	25	3	2016	N/A	3	>60	80.5	-1	N/A	N/A	0	3/31/2016	0	10.25	10.25	10.71	0	N/A	Aerial survey	Terry Hughes	Hughes, T. P., J. T. Kerry, and T. Simpson. 2018. Large-scale bleaching of corals on the Great Barrier Reef. Ecology 99:1530	N/A	Terry Hughes	terry.hughes@jcu.edu.au	AA	1	0.7	N/A	N/A	N/A	N/A	-12.225	143.275	1555	6465	11202465	2015-2016	3	0	80.5
AU_1223	AP	16	Far Northern GBR	52	Australia	Great Barrier Reef	Hazel Reef, 12-014	-12.2717	143.3	25	3	2016	N/A	3	>60	80.5	-1	N/A	N/A	0	3/31/2016	0	10.24	10.24	10.69	0	N/A	Aerial survey	Terry Hughes	Hughes, T. P., J. T. Kerry, and T. Simpson. 2018. Large-scale bleaching of corals on the Great Barrier Reef. Ecology 99:1531	N/A	Terry Hughes	terry.hughes@jcu.edu.au	AA	1	0.7	N/A	N/A	N/A	N/A	-12.275	143.275	1554	6465	11195265	2015-2016	3	0	80.5
AU_1224	AP	16	Far Northern GBR	52	Australia	Great Barrier Reef	Daniell Reef, 12-018	-12.3119	143.197	25	3	2016	N/A	3	>60	80.5	-1	N/A	N/A	0	3/31/2016	0	10.93	10.93	11.38	0	N/A	Aerial survey	Terry Hughes	Hughes, T. P., J. T. Kerry, and T. Simpson. 2018. Large-scale bleaching of corals on the Great Barrier Reef. Ecology 99:1532	N/A	Terry Hughes	terry.hughes@jcu.edu.au	AA	1	0.84	N/A	N/A	N/A	N/A	-12.325	143.175	1553	6463	11188063	2015-2016	3	0	80.5
AU_1225	AP	16	Far Northern GBR	52	Australia	Great Barrier Reef	U/N Reef, 12-075	-12.5556	143.323	25	3	2016	N/A	3	>60	80.5	-1	N/A	N/A	0	3/30/2016	0	10.85	10.85	11.15	0	N/A	Aerial survey	Terry Hughes	Hughes, T. P., J. T. Kerry, and T. Simpson. 2018. Large-scale bleaching of corals on the Great Barrier Reef. Ecology 99:1533	N/A	Terry Hughes	terry.hughes@jcu.edu.au	AA	1	1.1	N/A	N/A	N/A	N/A	-12.575	143.325	1548	6466	11152066	2015-2016	3	0	80.5
AU_1226	AP	16	Far Northern GBR	52	Australia	Great Barrier Reef	Rocky Island Reef, 12-076	-12.5863	143.39	25	3	2016	N/A	3	>60	80.5	-1	N/A	N/A	0	3/30/2016	0	10.23	10.23	10.54	0	N/A	Aerial survey	Terry Hughes	Hughes, T. P., J. T. Kerry, and T. Simpson. 2018. Large-scale bleaching of corals on the Great Barrier Reef. Ecology 99:1534	N/A	Terry Hughes	terry.hughes@jcu.edu.au	AA	1	0.94	N/A	N/A	N/A	N/A	-12.575	143.375	1548	6467	11152067	2015-2016	3	0	80.5
AU_1227	AP	16	Far Northern GBR	52	Australia	Great Barrier Reef	U/N Reef, 12-077	-12.6125	143.435	25	3	2016	N/A	3	>60	80.5	-1	N/A	N/A	0	3/30/2016	0	9.74	9.74	10.06	0	N/A	Aerial survey	Terry Hughes	Hughes, T. P., J. T. Kerry, and T. Simpson. 2018. Large-scale bleaching of corals on the Great Barrier Reef. Ecology 99:1535	N/A	Terry Hughes	terry.hughes@jcu.edu.au	AA	1	0.93	N/A	N/A	N/A	N/A	-12.625	143.425	1547	6468	11144868	2015-2016	3	0	80.5
AU_1228	AP	16	Far Northern GBR	52	Australia	Great Barrier Reef	Restoration Island Reef, 12-078	-12.6233	143.447	25	3	2016	N/A	3	>60	80.5	-1	N/A	N/A	0	3/30/2016	0	9.74	9.74	10.06	0	N/A	Aerial survey	Terry Hughes	Hughes, T. P., J. T. Kerry, and T. Simpson. 2018. Large-scale bleaching of corals on the Great Barrier Reef. Ecology 99:1536	N/A	Terry Hughes	terry.hughes@jcu.edu.au	AA	1	0.93	N/A	N/A	N/A	N/A	-12.625	143.425	1547	6468	11144868	2015-2016	3	0	80.5
AU_1229	AP	16	Far Northern GBR	52	Australia	Great Barrier Reef	U/N Reef, 13-007	-13.0321	143.514	25	3	2016	N/A	3	>60	80.5	-1	N/A	N/A	0	3/30/2016	0	10.37	10.37	10.69	0	N/A	Aerial survey	Terry Hughes	Hughes, T. P., J. T. Kerry, and T. Simpson. 2018. Large-scale bleaching of corals on the Great Barrier Reef. Ecology 99:1537	N/A	Terry Hughes	terry.hughes@jcu.edu.au	AA	1	0.89	N/A	N/A	N/A	N/A	-13.025	143.525	1539	6470	11087270	2015-2016	3	0	80.5
AU_1230	AP	16	Far Northern GBR	52	Australia	Great Barrier Reef	U/N Reef, 13-019	-13.1106	143.508	25	3	2016	N/A	3	>60	80.5	-1	N/A	N/A	0	3/30/2016	0	9.57	9.57	9.89	0	N/A	Aerial survey	Terry Hughes	Hughes, T. P., J. T. Kerry, and T. Simpson. 2018. Large-scale bleaching of corals on the Great Barrier Reef. Ecology 99:1538	N/A	Terry Hughes	terry.hughes@jcu.edu.au	AA	1	0.85	N/A	N/A	N/A	N/A	-13.125	143.525	1537	6470	11072870	2015-2016	3	0	80.5
AU_1231	AP	16	Far Northern GBR	52	Australia	Great Barrier Reef	U/N Reef, 13-029	-13.1711	143.522	25	3	2016	N/A	3	>60	80.5	-1	N/A	N/A	0	3/30/2016	0	9.45	9.45	9.78	0	N/A	Aerial survey	Terry Hughes	Hughes, T. P., J. T. Kerry, and T. Simpson. 2018. Large-scale bleaching of corals on the Great Barrier Reef. Ecology 99:1539	N/A	Terry Hughes	terry.hughes@jcu.edu.au	AA	1	0.7	N/A	N/A	N/A	N/A	-13.175	143.525	1536	6470	11065670	2015-2016	3	0	80.5
AU_1232	AP	16	Far Northern GBR	52	Australia	Great Barrier Reef	Hannah Island Reef, 13-097	-13.8652	143.718	25	3	2016	N/A	3	>60	80.5	-1	N/A	N/A	0	3/26/2016	0	7.31	7.31	7.45	0	N/A	Aerial survey	Terry Hughes	Hughes, T. P., J. T. Kerry, and T. Simpson. 2018. Large-scale bleaching of corals on the Great Barrier Reef. Ecology 99:1540	N/A	Terry Hughes	terry.hughes@jcu.edu.au	AA	1	1.02	N/A	N/A	N/A	N/A	-13.875	143.725	1522	6474	10964874	2015-2016	3	0	80.5
AU_1233	AP	16	Far Northern GBR	52	Australia	Great Barrier Reef	Burkitt Reef, 13-111	-13.9438	143.754	25	3	2016	N/A	3	>60	80.5	-1	N/A	N/A	0	3/25/2016	1	6.56	6.56	6.56	0	N/A	Aerial survey	Terry Hughes	Hughes, T. P., J. T. Kerry, and T. Simpson. 2018. Large-scale bleaching of corals on the Great Barrier Reef. Ecology 99:1541	N/A	Terry Hughes	terry.hughes@jcu.edu.au	AA	1	0.86	N/A	N/A	N/A	N/A	-13.925	143.775	1521	6475	10957675	2015-2016	3	0	80.5
AU_1234	AP	16	Far Northern GBR	52	Australia	Great Barrier Reef	Cliff Islands Reef (West), 14-012	-14.2206	143.774	25	3	2016	N/A	3	>60	80.5	-1	N/A	N/A	0	3/23/2016	2	6.11	6.11	6.11	0	2	Aerial survey	Terry Hughes	Hughes, T. P., J. T. Kerry, and T. Simpson. 2018. Large-scale bleaching of corals on the Great Barrier Reef. Ecology 99:1542	N/A	Terry Hughes	terry.hughes@jcu.edu.au	AA	1	0.84	N/A	N/A	N/A	N/A	-14.225	143.775	1515	6475	10914475	2015-2016	3	0	80.5
AU_1235	AP	16	Far Northern GBR	52	Australia	Great Barrier Reef	Cliff Islands Reef (East), 14-013	-14.2257	143.792	25	3	2016	N/A	3	>60	80.5	-1	N/A	N/A	0	3/23/2016	2	6.11	6.11	6.11	0	2	Aerial survey	Terry Hughes	Hughes, T. P., J. T. Kerry, and T. Simpson. 2018. Large-scale bleaching of corals on the Great Barrier Reef. Ecology 99:1543	N/A	Terry Hughes	terry.hughes@jcu.edu.au	AA	1	0.84	N/A	N/A	N/A	N/A	-14.225	143.775	1515	6475	10914475	2015-2016	3	0	80.5
AU_1236	AP	16	Far Northern GBR	52	Australia	Great Barrier Reef	MacLear Reef, 14-029	-14.209	144.246	25	3	2016	N/A	3	>60	80.5	-1	N/A	N/A	0	3/24/2016	2	5.74	5.74	5.74	0	1	Aerial survey	Terry Hughes	Hughes, T. P., J. T. Kerry, and T. Simpson. 2018. Large-scale bleaching of corals on the Great Barrier Reef. Ecology 99:1544	N/A	Terry Hughes	terry.hughes@jcu.edu.au	AA	1	0.5	N/A	N/A	N/A	N/A	-14.225	144.225	1515	6484	10914484	2015-2016	3	0	80.5
AU_1237	AP	16	Far Northern GBR	52	Australia	Great Barrier Reef	Blackwood Reef, 14-031	-14.2175	144.222	25	3	2016	N/A	3	>60	80.5	-1	N/A	N/A	0	3/24/2016	2	5.74	5.74	5.74	0	1	Aerial survey	Terry Hughes	Hughes, T. P., J. T. Kerry, and T. Simpson. 2018. Large-scale bleaching of corals on the Great Barrier Reef. Ecology 99:1545	N/A	Terry Hughes	terry.hughes@jcu.edu.au	AA	1	0.5	N/A	N/A	N/A	N/A	-14.225	144.225	1515	6484	10914484	2015-2016	3	0	80.5
AU_1238	AP	16	Far Northern GBR	52	Australia	Great Barrier Reef	Denham Reef, 14-032	-14.2219	144.268	25	3	2016	N/A	3	>60	80.5	-1	N/A	N/A	0	3/25/2016	1	6.36	6.36	6.36	0	N/A	Aerial survey	Terry Hughes	Hughes, T. P., J. T. Kerry, and T. Simpson. 2018. Large-scale bleaching of corals on the Great Barrier Reef. Ecology 99:1546	N/A	Terry Hughes	terry.hughes@jcu.edu.au	AA	1	0.52	N/A	N/A	N/A	N/A	-14.225	144.275	1515	6485	10914485	2015-2016	3	0	80.5
AU_1239	AP	16	Far Northern GBR	52	Australia	Great Barrier Reef	Rocky Islets Reef (North), 14-033a	-14.2562	144.348	25	3	2016	N/A	3	>60	80.5	-1	N/A	N/A	0	3/25/2016	1	6.82	6.82	6.82	0	N/A	Aerial survey	Terry Hughes	Hughes, T. P., J. T. Kerry, and T. Simpson. 2018. Large-scale bleaching of corals on the Great Barrier Reef. Ecology 99:1547	N/A	Terry Hughes	terry.hughes@jcu.edu.au	AA	1	0.67	N/A	N/A	N/A	N/A	-14.275	144.325	1514	6486	10907286	2015-2016	3	0	80.5
AU_1240	AP	16	Far Northern GBR	52	Australia	Great Barrier Reef	Rocky Islets Reef (South), 14-033b	-14.271	144.356	25	3	2016	N/A	3	>60	80.5	-1	N/A	N/A	0	3/25/2016	1	6.85	6.85	6.85	0	N/A	Aerial survey	Terry Hughes	Hughes, T. P., J. T. Kerry, and T. Simpson. 2018. Large-scale bleaching of corals on the Great Barrier Reef. Ecology 99:1548	N/A	Terry Hughes	terry.hughes@jcu.edu.au	AA	1	0.67	N/A	N/A	N/A	N/A	-14.275	144.375	1514	6487	10907287	2015-2016	3	0	80.5
AU_1241	AP	16	Far Northern GBR	52	Australia	Great Barrier Reef	Baron Reef, 14-070	-14.4744	144.698	25	3	2016	N/A	3	>60	80.5	-1	N/A	N/A	0	3/26/2016	0	7.55	7.55	7.7	0	N/A	Aerial survey	Terry Hughes	Hughes, T. P., J. T. Kerry, and T. Simpson. 2018. Large-scale bleaching of corals on the Great Barrier Reef. Ecology 99:1549	N/A	Terry Hughes	terry.hughes@jcu.edu.au	AA	1	1.57	N/A	N/A	N/A	N/A	-14.475	144.675	1510	6493	10878493	2015-2016	3	0	80.5
AU_1242	AP	16	Far Northern GBR	52	Australia	Great Barrier Reef	Weigall Reefs (East), 14-071a	-14.4742	144.643	25	3	2016	N/A	3	>60	80.5	-1	N/A	N/A	0	3/26/2016	0	7.93	7.93	8.09	0	N/A	Aerial survey	Terry Hughes	Hughes, T. P., J. T. Kerry, and T. Simpson. 2018. Large-scale bleaching of corals on the Great Barrier Reef. Ecology 99:1550	N/A	Terry Hughes	terry.hughes@jcu.edu.au	AA	1	1.88	N/A	N/A	N/A	N/A	-14.475	144.625	1510	6492	10878492	2015-2016	3	0	80.5
AU_1243	AP	16	Far Northern GBR	52	Australia	Great Barrier Reef	Weigall Reefs (West), 14-071b	-14.479	144.638	25	3	2016	N/A	3	>60	80.5	-1	N/A	N/A	0	3/26/2016	0	7.93	7.93	8.09	0	N/A	Aerial survey	Terry Hughes	Hughes, T. P., J. T. Kerry, and T. Simpson. 2018. Large-scale bleaching of corals on the Great Barrier Reef. Ecology 99:1551	N/A	Terry Hughes	terry.hughes@jcu.edu.au	AA	1	1.88	N/A	N/A	N/A	N/A	-14.475	144.625	1510	6492	10878492	2015-2016	3	0	80.5
AU_1244	AP	16	Far Northern GBR	52	Australia	Great Barrier Reef	Noble Reef, 14-091	-14.5016	144.765	25	3	2016	N/A	3	>60	80.5	-1	N/A	N/A	0	3/26/2016	0	7.61	7.61	7.76	0	N/A	Aerial survey	Terry Hughes	Hughes, T. P., J. T. Kerry, and T. Simpson. 2018. Large-scale bleaching of corals on the Great Barrier Reef. Ecology 99:1552	N/A	Terry Hughes	terry.hughes@jcu.edu.au	AA	1	1.58	N/A	N/A	N/A	N/A	-14.525	144.775	1509	6495	10871295	2015-2016	3	0	80.5
AU_1245	AP	16	Far Northern GBR	52	Australia	Great Barrier Reef	Sand Reef, 14-093	-14.5216	144.845	25	3	2016	N/A	3	>60	80.5	-1	N/A	N/A	0	3/26/2016	0	7.26	7.26	7.41	0	N/A	Aerial survey	Terry Hughes	Hughes, T. P., J. T. Kerry, and T. Simpson. 2018. Large-scale bleaching of corals on the Great Barrier Reef. Ecology 99:1553	N/A	Terry Hughes	terry.hughes@jcu.edu.au	AA	1	1.54	N/A	N/A	N/A	N/A	-14.525	144.825	1509	6496	10871296	2015-2016	3	0	80.5
AU_1246	AP	16	Far Northern GBR	52	Australia	Great Barrier Reef	U/N Reef, 14-096	-14.5395	144.856	25	3	2016	N/A	3	>60	80.5	-1	N/A	N/A	0	3/26/2016	0	7.41	7.41	7.57	0	N/A	Aerial survey	Terry Hughes	Hughes, T. P., J. T. Kerry, and T. Simpson. 2018. Large-scale bleaching of corals on the Great Barrier Reef. Ecology 99:1554	N/A	Terry Hughes	terry.hughes@jcu.edu.au	AA	1	1.37	N/A	N/A	N/A	N/A	-14.525	144.875	1509	6497	10871297	2015-2016	3	0	80.5
AU_1247	AP	16	Far Northern GBR	52	Australia	Great Barrier Reef	Leggatt Reef, 14-099	-14.5481	144.87	25	3	2016	N/A	3	>60	80.5	-1	N/A	N/A	0	3/26/2016	0	7.41	7.41	7.57	0	N/A	Aerial survey	Terry Hughes	Hughes, T. P., J. T. Kerry, and T. Simpson. 2018. Large-scale bleaching of corals on the Great Barrier Reef. Ecology 99:1555	N/A	Terry Hughes	terry.hughes@jcu.edu.au	AA	1	1.37	N/A	N/A	N/A	N/A	-14.525	144.875	1509	6497	10871297	2015-2016	3	0	80.5
AU_1248	AP	16	Far Northern GBR	52	Australia	Great Barrier Reef	Sinclair-Morris Reef, 14-101	-14.5535	144.905	25	3	2016	N/A	3	>60	80.5	-1	N/A	N/A	0	3/26/2016	0	7.7	7.7	7.85	0	N/A	Aerial survey	Terry Hughes	Hughes, T. P., J. T. Kerry, and T. Simpson. 2018. Large-scale bleaching of corals on the Great Barrier Reef. Ecology 99:1556	N/A	Terry Hughes	terry.hughes@jcu.edu.au	AA	1	1.38	N/A	N/A	N/A	N/A	-14.575	144.925	1508	6498	10864098	2015-2016	3	0	80.5
AU_1249	AP	16	Far Northern GBR	52	Australia	Great Barrier Reef	Hampton Reef, 14-102	-14.5628	144.889	25	3	2016	N/A	3	>60	80.5	-1	N/A	N/A	0	3/26/2016	0	7.76	7.76	7.92	0	N/A	Aerial survey	Terry Hughes	Hughes, T. P., J. T. Kerry, and T. Simpson. 2018. Large-scale bleaching of corals on the Great Barrier Reef. Ecology 99:1557	N/A	Terry Hughes	terry.hughes@jcu.edu.au	AA	1	1.57	N/A	N/A	N/A	N/A	-14.575	144.875	1508	6497	10864097	2015-2016	3	0	80.5
AU_1250	AP	16	Far Northern GBR	52	Australia	Great Barrier Reef	Beatrice Reef, 14-103	-14.5739	144.927	25	3	2016	N/A	3	>60	80.5	-1	N/A	N/A	0	3/26/2016	0	7.7	7.7	7.85	0	N/A	Aerial survey	Terry Hughes	Hughes, T. P., J. T. Kerry, and T. Simpson. 2018. Large-scale bleaching of corals on the Great Barrier Reef. Ecology 99:1558	N/A	Terry Hughes	terry.hughes@jcu.edu.au	AA	1	1.38	N/A	N/A	N/A	N/A	-14.575	144.925	1508	6498	10864098	2015-2016	3	0	80.5
AU_1251	AP	16	Northern GBR	53	Australia	Great Barrier Reef	Conical Rock Reef, 15-006	-15.1383	145.318	25	3	2016	N/A	3	>60	80.5	-1	N/A	N/A	0	3/23/2016	2	4.46	4.46	4.46	0	2	Aerial survey	Terry Hughes	Hughes, T. P., J. T. Kerry, and T. Simpson. 2018. Large-scale bleaching of corals on the Great Barrier Reef. Ecology 99:1559	N/A	Terry Hughes	terry.hughes@jcu.edu.au	AA	1	0.8	N/A	N/A	N/A	N/A	-15.125	145.325	1497	6506	10784906	2015-2016	3	0	80.5
AU_1252	AP	16	Northern GBR	53	Australia	Great Barrier Reef	Beor Reef, 15-008	-15.1589	145.268	25	3	2016	N/A	3	>60	80.5	-1	N/A	N/A	0	3/3/2016	2	4.38	4.38	4.38	0	22	Aerial survey	Terry Hughes	Hughes, T. P., J. T. Kerry, and T. Simpson. 2018. Large-scale bleaching of corals on the Great Barrier Reef. Ecology 99:1560	N/A	Terry Hughes	terry.hughes@jcu.edu.au	AA	1	0.77	N/A	N/A	N/A	N/A	-15.175	145.275	1496	6505	10777705	2015-2016	3	0	80.5
AU_1253	AP	16	Southern GBR	54	Australia	Great Barrier Reef	Heron Reef, 23-052a	-23.4462	151.971	28	4	2016	N/A	0	<1	0	-1	N/A	N/A	0	6/1/2015	2	0	0	0	0	451	Aerial survey	Terry Hughes	Hughes, T. P., J. T. Kerry, and T. Simpson. 2018. Large-scale bleaching of corals on the Great Barrier Reef. Ecology 99:1561	N/A	Terry Hughes	terry.hughes@jcu.edu.au	AA	1	1.02	N/A	N/A	N/A	N/A	-23.425	151.975	1331	6639	9589839	2015-2016	0	0	0
AU_1254	AP	16	Southern GBR	54	Australia	Great Barrier Reef	Wistari Reef, 23-053	-23.4699	151.877	28	4	2016	N/A	0	<1	0	-1	N/A	N/A	0	6/1/2015	2	0	0	0	0	451	Aerial survey	Terry Hughes	Hughes, T. P., J. T. Kerry, and T. Simpson. 2018. Large-scale bleaching of corals on the Great Barrier Reef. Ecology 99:1562	N/A	Terry Hughes	terry.hughes@jcu.edu.au	AA	1	0.83	N/A	N/A	N/A	N/A	-23.475	151.875	1330	6637	9582637	2015-2016	0	0	0
AU_1255	AP	16	Southern GBR	54	Australia	Great Barrier Reef	Erskine Reef, 23-068	-23.5019	151.774	28	4	2016	N/A	0	<1	0	-1	N/A	N/A	0	6/1/2015	2	0	0	0	0	451	Aerial survey	Terry Hughes	Hughes, T. P., J. T. Kerry, and T. Simpson. 2018. Large-scale bleaching of corals on the Great Barrier Reef. Ecology 99:1563	N/A	Terry Hughes	terry.hughes@jcu.edu.au	AA	1	1.02	N/A	N/A	N/A	N/A	-23.525	151.775	1329	6635	9575435	2015-2016	0	0	0
AU_1256	AP	16	Southern GBR	54	Australia	Great Barrier Reef	Mast Head Reef, 23-069	-23.5269	151.727	28	4	2016	N/A	0	<1	0	-1	N/A	N/A	0	6/1/2015	2	0	0	0	0	451	Aerial survey	Terry Hughes	Hughes, T. P., J. T. Kerry, and T. Simpson. 2018. Large-scale bleaching of corals on the Great Barrier Reef. Ecology 99:1564	N/A	Terry Hughes	terry.hughes@jcu.edu.au	AA	1	1.05	N/A	N/A	N/A	N/A	-23.525	151.725	1329	6634	9575434	2015-2016	0	0	0
AU_1257	AP	16	Southern GBR	54	Australia	Great Barrier Reef	Irving Reef, 23-070	-23.5388	151.627	28	4	2016	N/A	0	<1	0	-1	N/A	N/A	0	2/1/2016	2	0.15	0	0.15	0	87	Aerial survey	Terry Hughes	Hughes, T. P., J. T. Kerry, and T. Simpson. 2018. Large-scale bleaching of corals on the Great Barrier Reef. Ecology 99:1565	N/A	Terry Hughes	terry.hughes@jcu.edu.au	AA	1	1.12	N/A	N/A	N/A	N/A	-23.525	151.625	1329	6632	9575432	2015-2016	0	0	0
AU_1258	AP	16	Southern GBR	54	Australia	Great Barrier Reef	Polmaise Reef, 23-071	-23.5559	151.678	28	4	2016	N/A	0	<1	0	-1	N/A	N/A	0	2/1/2016	2	0.14	0	0.14	0	87	Aerial survey	Terry Hughes	Hughes, T. P., J. T. Kerry, and T. Simpson. 2018. Large-scale bleaching of corals on the Great Barrier Reef. Ecology 99:1566	N/A	Terry Hughes	terry.hughes@jcu.edu.au	AA	1	1.1	N/A	N/A	N/A	N/A	-23.575	151.675	1328	6633	9568233	2015-2016	0	0	0
AU_1259	AP	16	Northern GBR	53	Australia	Great Barrier Reef	Little Fitzroy Island Reef, 16-055	-16.923	146.006	30	3	2016	N/A	2	30-60	45	-1	N/A	N/A	0	3/2/2016	2	3.11	3.11	3.11	0	28	Aerial survey	Terry Hughes	Hughes, T. P., J. T. Kerry, and T. Simpson. 2018. Large-scale bleaching of corals on the Great Barrier Reef. Ecology 99:1567	N/A	Terry Hughes	terry.hughes@jcu.edu.au	AA	1	1.39	N/A	N/A	N/A	N/A	-16.925	146.025	1461	6520	10525720	2015-2016	2	0	45
AU_1260	AP	16	Northern GBR	53	Australia	Great Barrier Reef	Thetford Reef, 16-068	-16.803	146.181	30	3	2016	N/A	2	30-60	45	-1	N/A	N/A	0	3/3/2016	2	3.39	3.39	3.39	0	27	Aerial survey	Terry Hughes	Hughes, T. P., J. T. Kerry, and T. Simpson. 2018. Large-scale bleaching of corals on the Great Barrier Reef. Ecology 99:1568	N/A	Terry Hughes	terry.hughes@jcu.edu.au	AA	1	2.3	N/A	N/A	N/A	N/A	-16.825	146.175	1463	6523	10540123	2015-2016	2	0	45
AU_1261	AP	16	Northern GBR	53	Australia	Great Barrier Reef	Moore Reef, 16-071	-16.8743	146.213	30	3	2016	N/A	3	>60	80.5	-1	N/A	N/A	0	3/3/2016	2	3.01	3.01	3.01	0	27	Aerial survey	Terry Hughes	Hughes, T. P., J. T. Kerry, and T. Simpson. 2018. Large-scale bleaching of corals on the Great Barrier Reef. Ecology 99:1569	N/A	Terry Hughes	terry.hughes@jcu.edu.au	AA	1	1.86	N/A	N/A	N/A	N/A	-16.875	146.225	1462	6524	10532924	2015-2016	3	0	80.5
AU_1262	AP	16	Northern GBR	53	Australia	Great Barrier Reef	Elford Reef, 16-073	-16.9116	146.249	30	3	2016	N/A	2	30-60	45	-1	N/A	N/A	0	3/3/2016	2	2.91	2.91	2.91	0	27	Aerial survey	Terry Hughes	Hughes, T. P., J. T. Kerry, and T. Simpson. 2018. Large-scale bleaching of corals on the Great Barrier Reef. Ecology 99:1570	N/A	Terry Hughes	terry.hughes@jcu.edu.au	AA	1	1.85	N/A	N/A	N/A	N/A	-16.925	146.225	1461	6524	10525724	2015-2016	2	0	45
AU_1263	AP	16	Northern GBR	53	Australia	Great Barrier Reef	Sudbury Reef (No 1), 17-001a	-16.9984	146.205	30	3	2016	N/A	2	10-30	20	-1	N/A	N/A	0	3/2/2016	2	2.57	2.57	2.57	0	28	Aerial survey	Terry Hughes	Hughes, T. P., J. T. Kerry, and T. Simpson. 2018. Large-scale bleaching of corals on the Great Barrier Reef. Ecology 99:1571	N/A	Terry Hughes	terry.hughes@jcu.edu.au	AA	1	1.84	N/A	N/A	N/A	N/A	-16.975	146.225	1460	6524	10518524	2015-2016	2	0	20
AU_1264	AP	16	Northern GBR	53	Australia	Great Barrier Reef	Scott Reef, 17-004	-17.0736	146.185	30	3	2016	N/A	2	30-60	45	-1	N/A	N/A	0	3/2/2016	2	2.54	2.54	2.54	0	28	Aerial survey	Terry Hughes	Hughes, T. P., J. T. Kerry, and T. Simpson. 2018. Large-scale bleaching of corals on the Great Barrier Reef. Ecology 99:1572	N/A	Terry Hughes	terry.hughes@jcu.edu.au	AA	1	1.71	N/A	N/A	N/A	N/A	-17.075	146.175	1458	6523	10504123	2015-2016	2	0	45
AU_1265	AP	16	Northern GBR	53	Australia	Great Barrier Reef	Stevens Reef, 17-005	-17.0989	146.411	30	3	2016	N/A	2	30-60	45	-1	N/A	N/A	0	3/25/2016	2	3.98	3.98	3.98	0	5	Aerial survey	Terry Hughes	Hughes, T. P., J. T. Kerry, and T. Simpson. 2018. Large-scale bleaching of corals on the Great Barrier Reef. Ecology 99:1573	N/A	Terry Hughes	terry.hughes@jcu.edu.au	AA	1	2.28	N/A	N/A	N/A	N/A	-17.075	146.425	1458	6528	10504128	2015-2016	2	0	45
AU_1266	AP	16	Northern GBR	53	Australia	Great Barrier Reef	Maori Reef, 17-006	-17.0943	146.345	30	3	2016	N/A	2	30-60	45	-1	N/A	N/A	0	3/2/2016	2	2.48	2.48	2.48	0	28	Aerial survey	Terry Hughes	Hughes, T. P., J. T. Kerry, and T. Simpson. 2018. Large-scale bleaching of corals on the Great Barrier Reef. Ecology 99:1574	N/A	Terry Hughes	terry.hughes@jcu.edu.au	AA	1	1.99	N/A	N/A	N/A	N/A	-17.075	146.325	1458	6526	10504126	2015-2016	2	0	45
AU_1267	AP	16	Northern GBR	53	Australia	Great Barrier Reef	Noggin Reef, 17-008	-17.1263	146.469	30	3	2016	N/A	2	30-60	45	-1	N/A	N/A	0	3/27/2016	2	4.49	4.49	4.49	0	3	Aerial survey	Terry Hughes	Hughes, T. P., J. T. Kerry, and T. Simpson. 2018. Large-scale bleaching of corals on the Great Barrier Reef. Ecology 99:1575	N/A	Terry Hughes	terry.hughes@jcu.edu.au	AA	1	2.46	N/A	N/A	N/A	N/A	-17.125	146.475	1457	6529	10496929	2015-2016	2	0	45
AU_1268	AP	16	Northern GBR	53	Australia	Great Barrier Reef	Flora Reef, 17-010	-17.1848	146.291	30	3	2016	N/A	1	1-10	5.5	-1	N/A	N/A	0	3/1/2016	2	2.27	2.27	2.27	0	29	Aerial survey	Terry Hughes	Hughes, T. P., J. T. Kerry, and T. Simpson. 2018. Large-scale bleaching of corals on the Great Barrier Reef. Ecology 99:1576	N/A	Terry Hughes	terry.hughes@jcu.edu.au	AA	1	2.04	N/A	N/A	N/A	N/A	-17.175	146.275	1456	6525	10489725	2015-2016	1	0	5.5
AU_1269	AP	16	Northern GBR	53	Australia	Great Barrier Reef	Coates Reef, 17-011	-17.1971	146.369	30	3	2016	N/A	2	30-60	45	-1	N/A	N/A	0	3/1/2016	2	2.47	2.47	2.47	0	29	Aerial survey	Terry Hughes	Hughes, T. P., J. T. Kerry, and T. Simpson. 2018. Large-scale bleaching of corals on the Great Barrier Reef. Ecology 99:1577	N/A	Terry Hughes	terry.hughes@jcu.edu.au	AA	1	1.9	N/A	N/A	N/A	N/A	-17.175	146.375	1456	6527	10489727	2015-2016	2	0	45
AU_1270	AP	16	Northern GBR	53	Australia	Great Barrier Reef	Hedley Reef, 17-014	-17.2286	146.484	30	3	2016	N/A	3	>60	80.5	-1	N/A	N/A	0	3/25/2016	2	3.15	3.15	3.15	0	5	Aerial survey	Terry Hughes	Hughes, T. P., J. T. Kerry, and T. Simpson. 2018. Large-scale bleaching of corals on the Great Barrier Reef. Ecology 99:1578	N/A	Terry Hughes	terry.hughes@jcu.edu.au	AA	1	2.33	N/A	N/A	N/A	N/A	-17.225	146.475	1455	6529	10482529	2015-2016	3	0	80.5
AU_1271	AP	16	Northern GBR	53	Australia	Great Barrier Reef	McCulloch Reef (No 1), 17-016a	-17.2879	146.442	30	3	2016	N/A	2	30-60	45	-1	N/A	N/A	0	3/1/2016	2	2.46	2.46	2.46	0	29	Aerial survey	Terry Hughes	Hughes, T. P., J. T. Kerry, and T. Simpson. 2018. Large-scale bleaching of corals on the Great Barrier Reef. Ecology 99:1579	N/A	Terry Hughes	terry.hughes@jcu.edu.au	AA	1	2.08	N/A	N/A	N/A	N/A	-17.275	146.425	1454	6528	10475328	2015-2016	2	0	45
AU_1272	AP	16	Northern GBR	53	Australia	Great Barrier Reef	Gibson Reef, 17-017	-17.302	146.36	30	3	2016	N/A	2	10-30	20	-1	N/A	N/A	0	3/1/2016	2	2.25	2.25	2.25	0	29	Aerial survey	Terry Hughes	Hughes, T. P., J. T. Kerry, and T. Simpson. 2018. Large-scale bleaching of corals on the Great Barrier Reef. Ecology 99:1580	N/A	Terry Hughes	terry.hughes@jcu.edu.au	AA	1	2.26	N/A	N/A	N/A	N/A	-17.325	146.375	1453	6527	10468127	2015-2016	2	0	20
AU_1273	AP	16	Northern GBR	53	Australia	Great Barrier Reef	Howie Reef, 17-018a	-17.3939	146.385	30	3	2016	N/A	2	10-30	20	-1	N/A	N/A	0	3/1/2016	2	2.26	2.26	2.26	0	29	Aerial survey	Terry Hughes	Hughes, T. P., J. T. Kerry, and T. Simpson. 2018. Large-scale bleaching of corals on the Great Barrier Reef. Ecology 99:1581	N/A	Terry Hughes	terry.hughes@jcu.edu.au	AA	1	2.27	N/A	N/A	N/A	N/A	-17.375	146.375	1452	6527	10460927	2015-2016	2	0	20
AU_1274	AP	16	Northern GBR	53	Australia	Great Barrier Reef	Cayley Reef, 17-023	-17.4768	146.457	30	3	2016	N/A	2	30-60	45	-1	N/A	N/A	0	3/23/2016	2	2.59	2.59	2.59	0	7	Aerial survey	Terry Hughes	Hughes, T. P., J. T. Kerry, and T. Simpson. 2018. Large-scale bleaching of corals on the Great Barrier Reef. Ecology 99:1582	N/A	Terry Hughes	terry.hughes@jcu.edu.au	AA	1	2.31	N/A	N/A	N/A	N/A	-17.475	146.475	1450	6529	10446529	2015-2016	2	0	45
AU_1275	AP	16	Northern GBR	53	Australia	Great Barrier Reef	Peart Reef, 17-024	-17.4823	146.391	30	3	2016	N/A	2	10-30	20	-1	N/A	N/A	0	3/1/2016	2	2.29	2.29	2.29	0	29	Aerial survey	Terry Hughes	Hughes, T. P., J. T. Kerry, and T. Simpson. 2018. Large-scale bleaching of corals on the Great Barrier Reef. Ecology 99:1583	N/A	Terry Hughes	terry.hughes@jcu.edu.au	AA	1	2.27	N/A	N/A	N/A	N/A	-17.475	146.375	1450	6527	10446527	2015-2016	2	0	20
AU_1276	AP	16	Northern GBR	53	Australia	Great Barrier Reef	Feather Reef, 17-034	-17.5329	146.377	30	3	2016	N/A	2	30-60	45	-1	N/A	N/A	0	3/1/2016	2	2.3	2.3	2.3	0	29	Aerial survey	Terry Hughes	Hughes, T. P., J. T. Kerry, and T. Simpson. 2018. Large-scale bleaching of corals on the Great Barrier Reef. Ecology 99:1584	N/A	Terry Hughes	terry.hughes@jcu.edu.au	AA	1	2.25	N/A	N/A	N/A	N/A	-17.525	146.375	1449	6527	10439327	2015-2016	2	0	45
AU_1277	AP	16	Northern GBR	53	Australia	Great Barrier Reef	Nathan Reef, 17-035	-17.5247	146.518	30	3	2016	N/A	2	30-60	45	-1	N/A	N/A	0	3/23/2016	2	3.53	3.53	3.53	0	7	Aerial survey	Terry Hughes	Hughes, T. P., J. T. Kerry, and T. Simpson. 2018. Large-scale bleaching of corals on the Great Barrier Reef. Ecology 99:1585	N/A	Terry Hughes	terry.hughes@jcu.edu.au	AA	1	2.49	N/A	N/A	N/A	N/A	-17.525	146.525	1449	6530	10439330	2015-2016	2	0	45
AU_1278	AP	16	Northern GBR	53	Australia	Great Barrier Reef	Hall-Thompson Reef, 17-037	-17.6094	146.457	30	3	2016	N/A	2	10-30	20	-1	N/A	N/A	0	3/1/2016	2	2.47	2.47	2.47	0	29	Aerial survey	Terry Hughes	Hughes, T. P., J. T. Kerry, and T. Simpson. 2018. Large-scale bleaching of corals on the Great Barrier Reef. Ecology 99:1586	N/A	Terry Hughes	terry.hughes@jcu.edu.au	AA	1	2.31	N/A	N/A	N/A	N/A	-17.625	146.475	1447	6529	10424929	2015-2016	2	0	20
AU_1279	AP	16	Northern GBR	53	Australia	Great Barrier Reef	Adelaide Reef, 17-042	-17.6538	146.471	30	3	2016	N/A	2	10-30	20	-1	N/A	N/A	0	3/1/2016	2	2.46	2.46	2.46	0	29	Aerial survey	Terry Hughes	Hughes, T. P., J. T. Kerry, and T. Simpson. 2018. Large-scale bleaching of corals on the Great Barrier Reef. Ecology 99:1587	N/A	Terry Hughes	terry.hughes@jcu.edu.au	AA	1	2.13	N/A	N/A	N/A	N/A	-17.675	146.475	1446	6529	10417729	2015-2016	2	0	20
AU_1280	AP	16	Northern GBR	53	Australia	Great Barrier Reef	Ellison Reef, 17-044	-17.7223	146.394	30	3	2016	N/A	2	10-30	20	-1	N/A	N/A	0	3/1/2016	2	2.25	2.25	2.25	0	29	Aerial survey	Terry Hughes	Hughes, T. P., J. T. Kerry, and T. Simpson. 2018. Large-scale bleaching of corals on the Great Barrier Reef. Ecology 99:1588	N/A	Terry Hughes	terry.hughes@jcu.edu.au	AA	1	1.73	N/A	N/A	N/A	N/A	-17.725	146.375	1445	6527	10410527	2015-2016	2	0	20
AU_1281	AP	16	Northern GBR	53	Australia	Great Barrier Reef	Eddy Reef, 17-047	-17.7743	146.435	30	3	2016	N/A	2	30-60	45	-1	N/A	N/A	0	3/1/2016	2	1.95	1.95	1.95	0	29	Aerial survey	Terry Hughes	Hughes, T. P., J. T. Kerry, and T. Simpson. 2018. Large-scale bleaching of corals on the Great Barrier Reef. Ecology 99:1589	N/A	Terry Hughes	terry.hughes@jcu.edu.au	AA	1	1.88	N/A	N/A	N/A	N/A	-17.775	146.425	1444	6528	10403328	2015-2016	2	0	45
AU_1282	AP	16	Northern GBR	53	Australia	Great Barrier Reef	Beaver Reef, 17-051	-17.8496	146.484	30	3	2016	N/A	2	30-60	45	-1	N/A	N/A	0	3/1/2016	2	1.95	1.95	1.95	0	29	Aerial survey	Terry Hughes	Hughes, T. P., J. T. Kerry, and T. Simpson. 2018. Large-scale bleaching of corals on the Great Barrier Reef. Ecology 99:1590	N/A	Terry Hughes	terry.hughes@jcu.edu.au	AA	1	2.05	N/A	N/A	N/A	N/A	-17.825	146.475	1443	6529	10396129	2015-2016	2	0	45
AU_1283	AP	16	Northern GBR	53	Australia	Great Barrier Reef	Gilbey Reef, 17-057	-17.5805	146.578	30	3	2016	N/A	3	>60	80.5	-1	N/A	N/A	0	3/24/2016	2	3.94	3.94	3.94	0	6	Aerial survey	Terry Hughes	Hughes, T. P., J. T. Kerry, and T. Simpson. 2018. Large-scale bleaching of corals on the Great Barrier Reef. Ecology 99:1591	N/A	Terry Hughes	terry.hughes@jcu.edu.au	AA	1	2.65	N/A	N/A	N/A	N/A	-17.575	146.575	1448	6531	10432131	2015-2016	3	0	80.5
AU_1284	AP	16	Northern GBR	53	Australia	Great Barrier Reef	Potter Reef (No 1), 17-059a	-17.6975	146.544	30	3	2016	N/A	2	30-60	45	-1	N/A	N/A	0	3/1/2016	2	2.81	2.81	2.81	0	29	Aerial survey	Terry Hughes	Hughes, T. P., J. T. Kerry, and T. Simpson. 2018. Large-scale bleaching of corals on the Great Barrier Reef. Ecology 99:1592	N/A	Terry Hughes	terry.hughes@jcu.edu.au	AA	1	2.32	N/A	N/A	N/A	N/A	-17.675	146.525	1446	6530	10417730	2015-2016	2	0	45
AU_1285	AP	16	Northern GBR	53	Australia	Great Barrier Reef	Noreaster Reef, 17-062	-17.7795	146.651	30	3	2016	N/A	2	30-60	45	-1	N/A	N/A	0	3/25/2016	2	4.09	4.09	4.09	0	5	Aerial survey	Terry Hughes	Hughes, T. P., J. T. Kerry, and T. Simpson. 2018. Large-scale bleaching of corals on the Great Barrier Reef. Ecology 99:1593	N/A	Terry Hughes	terry.hughes@jcu.edu.au	AA	1	2.5	N/A	N/A	N/A	N/A	-17.775	146.675	1444	6533	10403333	2015-2016	2	0	45
AU_1286	AP	16	Northern GBR	53	Australia	Great Barrier Reef	Farquharson Reef (No 1), 17-063a	-17.7909	146.517	30	3	2016	N/A	2	10-30	20	-1	N/A	N/A	0	3/1/2016	2	2.46	2.46	2.46	0	29	Aerial survey	Terry Hughes	Hughes, T. P., J. T. Kerry, and T. Simpson. 2018. Large-scale bleaching of corals on the Great Barrier Reef. Ecology 99:1594	N/A	Terry Hughes	terry.hughes@jcu.edu.au	AA	1	2.25	N/A	N/A	N/A	N/A	-17.775	146.525	1444	6530	10403330	2015-2016	2	0	20
AU_1287	AP	16	Northern GBR	53	Australia	Great Barrier Reef	Taylor Reef, 17-064	-17.8329	146.55	30	3	2016	N/A	2	10-30	20	-1	N/A	N/A	0	3/1/2016	2	2.12	2.12	2.12	0	29	Aerial survey	Terry Hughes	Hughes, T. P., J. T. Kerry, and T. Simpson. 2018. Large-scale bleaching of corals on the Great Barrier Reef. Ecology 99:1595	N/A	Terry Hughes	terry.hughes@jcu.edu.au	AA	1	2.23	N/A	N/A	N/A	N/A	-17.825	146.525	1443	6530	10396130	2015-2016	2	0	20
AU_1288	AP	16	Central GBR	51	Australia	Great Barrier Reef	Bob Endean Reef, 17-065	-17.8764	146.727	30	3	2016	N/A	3	>60	80.5	-1	N/A	N/A	0	3/25/2016	2	4.31	4.31	4.31	0	5	Aerial survey	Terry Hughes	Hughes, T. P., J. T. Kerry, and T. Simpson. 2018. Large-scale bleaching of corals on the Great Barrier Reef. Ecology 99:1596	N/A	Terry Hughes	terry.hughes@jcu.edu.au	AA	1	2.56	N/A	N/A	N/A	N/A	-17.875	146.725	1442	6534	10388934	2015-2016	3	0	80.5
AU_1289	AP	16	Central GBR	51	Australia	Great Barrier Reef	Yamacutta Reef, 17-066	-17.8885	146.586	30	3	2016	N/A	2	30-60	45	-1	N/A	N/A	0	3/1/2016	2	2.14	2.14	2.14	0	29	Aerial survey	Terry Hughes	Hughes, T. P., J. T. Kerry, and T. Simpson. 2018. Large-scale bleaching of corals on the Great Barrier Reef. Ecology 99:1597	N/A	Terry Hughes	terry.hughes@jcu.edu.au	AA	1	2.22	N/A	N/A	N/A	N/A	-17.875	146.575	1442	6531	10388931	2015-2016	2	0	45
AU_1290	AP	16	Central GBR	51	Australia	Great Barrier Reef	U/N Reef, 17-067	-17.9694	146.6	30	3	2016	N/A	2	10-30	20	-1	N/A	N/A	0	3/1/2016	2	1.94	1.94	1.94	0	29	Aerial survey	Terry Hughes	Hughes, T. P., J. T. Kerry, and T. Simpson. 2018. Large-scale bleaching of corals on the Great Barrier Reef. Ecology 99:1598	N/A	Terry Hughes	terry.hughes@jcu.edu.au	AA	1	2	N/A	N/A	N/A	N/A	-17.975	146.625	1440	6532	10374532	2015-2016	2	0	20
AU_1291	AP	16	Central GBR	51	Australia	Great Barrier Reef	Moss Reef, 17-068	-17.9456	146.795	30	3	2016	N/A	2	30-60	45	-1	N/A	N/A	0	3/28/2016	2	4.35	4.35	4.35	0	2	Aerial survey	Terry Hughes	Hughes, T. P., J. T. Kerry, and T. Simpson. 2018. Large-scale bleaching of corals on the Great Barrier Reef. Ecology 99:1599	N/A	Terry Hughes	terry.hughes@jcu.edu.au	AA	1	2.5	N/A	N/A	N/A	N/A	-17.925	146.775	1441	6535	10381735	2015-2016	2	0	45
AU_1292	AP	16	Central GBR	51	Australia	Great Barrier Reef	U/N Reef, 17-069	-17.9949	146.769	30	3	2016	N/A	2	30-60	45	-1	N/A	N/A	0	3/28/2016	2	4.11	4.11	4.11	0	2	Aerial survey	Terry Hughes	Hughes, T. P., J. T. Kerry, and T. Simpson. 2018. Large-scale bleaching of corals on the Great Barrier Reef. Ecology 99:1600	N/A	Terry Hughes	terry.hughes@jcu.edu.au	AA	1	2.61	N/A	N/A	N/A	N/A	-17.975	146.775	1440	6535	10374535	2015-2016	2	0	45
AU_1293	AP	16	Central GBR	51	Australia	Great Barrier Reef	Reg Ward Reef, 18-017	-18.032	146.785	30	3	2016	N/A	2	30-60	45	-1	N/A	N/A	0	3/3/2016	2	3.24	3.24	3.24	0	27	Aerial survey	Terry Hughes	Hughes, T. P., J. T. Kerry, and T. Simpson. 2018. Large-scale bleaching of corals on the Great Barrier Reef. Ecology 99:1601	N/A	Terry Hughes	terry.hughes@jcu.edu.au	AA	1	2.25	N/A	N/A	N/A	N/A	-18.025	146.775	1439	6535	10367335	2015-2016	2	0	45
AU_1294	AP	16	Central GBR	51	Australia	Great Barrier Reef	Otter Reef, 18-018	-18.0522	146.559	30	3	2016	N/A	2	10-30	20	-1	N/A	N/A	0	3/1/2016	2	1.84	1.84	1.84	0	29	Aerial survey	Terry Hughes	Hughes, T. P., J. T. Kerry, and T. Simpson. 2018. Large-scale bleaching of corals on the Great Barrier Reef. Ecology 99:1602	N/A	Terry Hughes	terry.hughes@jcu.edu.au	AA	1	2.1	N/A	N/A	N/A	N/A	-18.075	146.575	1438	6531	10360131	2015-2016	2	0	20
AU_1295	AP	16	Central GBR	51	Australia	Great Barrier Reef	Barnett Patches, 18-019	-18.0601	146.853	30	3	2016	N/A	2	30-60	45	-1	N/A	N/A	0	3/28/2016	2	4.32	4.32	4.32	0	2	Aerial survey	Terry Hughes	Hughes, T. P., J. T. Kerry, and T. Simpson. 2018. Large-scale bleaching of corals on the Great Barrier Reef. Ecology 99:1603	N/A	Terry Hughes	terry.hughes@jcu.edu.au	AA	1	2.62	N/A	N/A	N/A	N/A	-18.075	146.875	1438	6537	10360137	2015-2016	2	0	45
AU_1296	AP	16	Central GBR	51	Australia	Great Barrier Reef	U/N Reef, 18-023	-18.1335	146.967	30	3	2016	N/A	3	>60	80.5	-1	N/A	N/A	0	3/30/2016	1	5.32	5.32	5.32	0	N/A	Aerial survey	Terry Hughes	Hughes, T. P., J. T. Kerry, and T. Simpson. 2018. Large-scale bleaching of corals on the Great Barrier Reef. Ecology 99:1604	N/A	Terry Hughes	terry.hughes@jcu.edu.au	AA	1	2.94	N/A	N/A	N/A	N/A	-18.125	146.975	1437	6539	10352939	2015-2016	3	0	80.5
AU_1297	AP	16	Central GBR	51	Australia	Great Barrier Reef	Britomart Reef, 18-024	-18.2286	146.726	30	3	2016	N/A	2	10-30	20	-1	N/A	N/A	0	3/1/2016	2	2.04	2.04	2.04	0	29	Aerial survey	Terry Hughes	Hughes, T. P., J. T. Kerry, and T. Simpson. 2018. Large-scale bleaching of corals on the Great Barrier Reef. Ecology 99:1605	N/A	Terry Hughes	terry.hughes@jcu.edu.au	AA	1	2.82	N/A	N/A	N/A	N/A	-18.225	146.725	1435	6534	10338534	2015-2016	2	0	20
AU_1298	AP	16	Central GBR	51	Australia	Great Barrier Reef	Walker Reef, 18-026	-18.325	146.745	30	3	2016	N/A	1	1-10	5.5	-1	N/A	N/A	0	3/1/2016	2	2.03	2.03	2.03	0	29	Aerial survey	Terry Hughes	Hughes, T. P., J. T. Kerry, and T. Simpson. 2018. Large-scale bleaching of corals on the Great Barrier Reef. Ecology 99:1606	N/A	Terry Hughes	terry.hughes@jcu.edu.au	AA	1	3.11	N/A	N/A	N/A	N/A	-18.325	146.725	1433	6534	10324134	2015-2016	1	0	5.5
AU_1299	AP	16	Central GBR	51	Australia	Great Barrier Reef	Trunk Reef, 18-027	-18.3541	146.832	30	3	2016	N/A	2	30-60	45	-1	N/A	N/A	0	3/1/2016	2	2.53	2.53	2.53	0	29	Aerial survey	Terry Hughes	Hughes, T. P., J. T. Kerry, and T. Simpson. 2018. Large-scale bleaching of corals on the Great Barrier Reef. Ecology 99:1607	N/A	Terry Hughes	terry.hughes@jcu.edu.au	AA	1	3.28	N/A	N/A	N/A	N/A	-18.375	146.825	1432	6536	10316936	2015-2016	2	0	45
AU_1300	AP	16	Central GBR	51	Australia	Great Barrier Reef	U/N Reef, 18-028	-18.3866	146.763	30	3	2016	N/A	2	10-30	20	-1	N/A	N/A	0	3/1/2016	2	2.05	2.05	2.05	0	29	Aerial survey	Terry Hughes	Hughes, T. P., J. T. Kerry, and T. Simpson. 2018. Large-scale bleaching of corals on the Great Barrier Reef. Ecology 99:1608	N/A	Terry Hughes	terry.hughes@jcu.edu.au	AA	1	3.27	N/A	N/A	N/A	N/A	-18.375	146.775	1432	6535	10316935	2015-2016	2	0	20
AU_1301	AP	16	Central GBR	51	Australia	Great Barrier Reef	Kelso Reef, 18-030	-18.4365	146.99	30	3	2016	N/A	1	1-10	5.5	-1	N/A	N/A	0	3/30/2016	1	3.52	3.52	3.52	0	N/A	Aerial survey	Terry Hughes	Hughes, T. P., J. T. Kerry, and T. Simpson. 2018. Large-scale bleaching of corals on the Great Barrier Reef. Ecology 99:1609	N/A	Terry Hughes	terry.hughes@jcu.edu.au	AA	1	3.06	N/A	N/A	N/A	N/A	-18.425	146.975	1431	6539	10309739	2015-2016	1	0	5.5
AU_1302	AP	16	Central GBR	51	Australia	Great Barrier Reef	Little Kelso Reef, 18-031	-18.4691	146.993	30	3	2016	N/A	1	1-10	5.5	-1	N/A	N/A	0	3/30/2016	1	3.12	3.12	3.12	0	N/A	Aerial survey	Terry Hughes	Hughes, T. P., J. T. Kerry, and T. Simpson. 2018. Large-scale bleaching of corals on the Great Barrier Reef. Ecology 99:1610	N/A	Terry Hughes	terry.hughes@jcu.edu.au	AA	1	2.98	N/A	N/A	N/A	N/A	-18.475	146.975	1430	6539	10302539	2015-2016	1	0	5.5
AU_1303	AP	16	Central GBR	51	Australia	Great Barrier Reef	Rib Reef, 18-032	-18.4827	146.871	30	3	2016	N/A	1	1-10	5.5	-1	N/A	N/A	0	3/22/2016	2	2.5	2.5	2.5	0	8	Aerial survey	Terry Hughes	Hughes, T. P., J. T. Kerry, and T. Simpson. 2018. Large-scale bleaching of corals on the Great Barrier Reef. Ecology 99:1611	N/A	Terry Hughes	terry.hughes@jcu.edu.au	AA	1	3.05	N/A	N/A	N/A	N/A	-18.475	146.875	1430	6537	10302537	2015-2016	1	0	5.5
AU_1304	AP	16	Central GBR	51	Australia	Great Barrier Reef	Pith Reef, 18-033	-18.2089	147.016	30	3	2016	N/A	3	>60	80.5	-1	N/A	N/A	0	3/30/2016	1	5.89	5.89	5.89	0	N/A	Aerial survey	Terry Hughes	Hughes, T. P., J. T. Kerry, and T. Simpson. 2018. Large-scale bleaching of corals on the Great Barrier Reef. Ecology 99:1612	N/A	Terry Hughes	terry.hughes@jcu.edu.au	AA	1	3.51	N/A	N/A	N/A	N/A	-18.225	147.025	1435	6540	10338540	2015-2016	3	0	80.5
AU_1305	AP	16	Central GBR	51	Australia	Great Barrier Reef	Myrmidon Reef, 18-034	-18.2657	147.384	30	3	2016	N/A	2	30-60	45	-1	N/A	N/A	0	3/30/2016	1	7.24	7.24	7.24	0	N/A	Aerial survey	Terry Hughes	Hughes, T. P., J. T. Kerry, and T. Simpson. 2018. Large-scale bleaching of corals on the Great Barrier Reef. Ecology 99:1613	N/A	Terry Hughes	terry.hughes@jcu.edu.au	AA	1	3.45	N/A	N/A	N/A	N/A	-18.275	147.375	1434	6547	10331347	2015-2016	2	0	45
AU_1306	AP	16	Central GBR	51	Australia	Great Barrier Reef	Thread Shoal, 18-035	-18.3434	147.175	30	3	2016	N/A	2	30-60	45	-1	N/A	N/A	0	3/31/2016	0	6.64	6.64	6.8	0	N/A	Aerial survey	Terry Hughes	Hughes, T. P., J. T. Kerry, and T. Simpson. 2018. Large-scale bleaching of corals on the Great Barrier Reef. Ecology 99:1614	N/A	Terry Hughes	terry.hughes@jcu.edu.au	AA	1	3.57	N/A	N/A	N/A	N/A	-18.325	147.175	1433	6543	10324143	2015-2016	2	0	45
AU_1307	AP	16	Central GBR	51	Australia	Great Barrier Reef	Needle Reef, 18-037	-18.3612	147.205	30	3	2016	N/A	2	30-60	45	-1	N/A	N/A	0	3/31/2016	0	5.94	5.94	6.1	0	N/A	Aerial survey	Terry Hughes	Hughes, T. P., J. T. Kerry, and T. Simpson. 2018. Large-scale bleaching of corals on the Great Barrier Reef. Ecology 99:1615	N/A	Terry Hughes	terry.hughes@jcu.edu.au	AA	1	3.49	N/A	N/A	N/A	N/A	-18.375	147.225	1432	6544	10316944	2015-2016	2	0	45
AU_1308	AP	16	Central GBR	51	Australia	Great Barrier Reef	18-039, 18-039	-18.4138	147.449	30	3	2016	N/A	2	30-60	45	-1	N/A	N/A	0	3/30/2016	1	5.92	5.92	5.92	0	N/A	Aerial survey	Terry Hughes	Hughes, T. P., J. T. Kerry, and T. Simpson. 2018. Large-scale bleaching of corals on the Great Barrier Reef. Ecology 99:1616	N/A	Terry Hughes	terry.hughes@jcu.edu.au	AA	1	3.08	N/A	N/A	N/A	N/A	-18.425	147.425	1431	6548	10309748	2015-2016	2	0	45
AU_1309	AP	16	Central GBR	51	Australia	Great Barrier Reef	Roxburgh Reef, 18-042	-18.4318	147.058	30	3	2016	N/A	2	30-60	45	-1	N/A	N/A	0	3/31/2016	0	4.84	4.84	5	0	N/A	Aerial survey	Terry Hughes	Hughes, T. P., J. T. Kerry, and T. Simpson. 2018. Large-scale bleaching of corals on the Great Barrier Reef. Ecology 99:1617	N/A	Terry Hughes	terry.hughes@jcu.edu.au	AA	1	2.98	N/A	N/A	N/A	N/A	-18.425	147.075	1431	6541	10309741	2015-2016	2	0	45
AU_1310	AP	16	Central GBR	51	Australia	Great Barrier Reef	Fore And Aft Reef, 18-043	-18.5048	147.038	30	3	2016	N/A	2	10-30	20	-1	N/A	N/A	0	3/30/2016	1	2.77	2.77	2.77	0	N/A	Aerial survey	Terry Hughes	Hughes, T. P., J. T. Kerry, and T. Simpson. 2018. Large-scale bleaching of corals on the Great Barrier Reef. Ecology 99:1618	N/A	Terry Hughes	terry.hughes@jcu.edu.au	AA	1	2.64	N/A	N/A	N/A	N/A	-18.525	147.025	1429	6540	10295340	2015-2016	2	0	20
AU_1311	AP	16	Central GBR	51	Australia	Great Barrier Reef	Pelorus (North Palm or Yanooa) Reef, 18-048	-18.5565	146.489	30	3	2016	N/A	2	10-30	20	-1	N/A	N/A	0	3/2/2016	2	2.69	2.69	2.69	0	28	Aerial survey	Terry Hughes	Hughes, T. P., J. T. Kerry, and T. Simpson. 2018. Large-scale bleaching of corals on the Great Barrier Reef. Ecology 99:1619	N/A	Terry Hughes	terry.hughes@jcu.edu.au	AA	1	1.74	N/A	N/A	N/A	N/A	-18.575	146.475	1428	6529	10288129	2015-2016	2	0	20
AU_1312	AP	16	Central GBR	51	Australia	Great Barrier Reef	Orpheus (Goolboddi) Island Reef (No 1), 18-049a	-18.6021	146.487	30	3	2016	N/A	2	10-30	20	-1	N/A	N/A	0	3/1/2016	2	2.53	2.53	2.53	0	29	Aerial survey	Terry Hughes	Hughes, T. P., J. T. Kerry, and T. Simpson. 2018. Large-scale bleaching of corals on the Great Barrier Reef. Ecology 99:1620	N/A	Terry Hughes	terry.hughes@jcu.edu.au	AA	1	1.59	N/A	N/A	N/A	N/A	-18.625	146.475	1427	6529	10280929	2015-2016	2	0	20
AU_1313	AP	16	Central GBR	51	Australia	Great Barrier Reef	Orpheus (Goolboddi) Island Reef (No 2), 18-049b	-18.6339	146.495	30	3	2016	N/A	2	10-30	20	-1	N/A	N/A	0	3/1/2016	2	2.53	2.53	2.53	0	29	Aerial survey	Terry Hughes	Hughes, T. P., J. T. Kerry, and T. Simpson. 2018. Large-scale bleaching of corals on the Great Barrier Reef. Ecology 99:1621	N/A	Terry Hughes	terry.hughes@jcu.edu.au	AA	1	1.59	N/A	N/A	N/A	N/A	-18.625	146.475	1427	6529	10280929	2015-2016	2	0	20
AU_1314	AP	16	Central GBR	51	Australia	Great Barrier Reef	Orpheus (Goolboddi) Island Reef (No 3), 18-049c	-18.6582	146.489	30	3	2016	N/A	2	10-30	20	-1	N/A	N/A	0	3/2/2016	2	2.88	2.88	2.88	0	28	Aerial survey	Terry Hughes	Hughes, T. P., J. T. Kerry, and T. Simpson. 2018. Large-scale bleaching of corals on the Great Barrier Reef. Ecology 99:1622	N/A	Terry Hughes	terry.hughes@jcu.edu.au	AA	1	2.34	N/A	N/A	N/A	N/A	-18.675	146.475	1426	6529	10273729	2015-2016	2	0	20
AU_1315	AP	16	Central GBR	51	Australia	Great Barrier Reef	Orpheus (Goolboddi) Island Reef (No 4), 18-049d	-18.6393	146.506	30	3	2016	N/A	0	<1	0	-1	N/A	N/A	0	3/1/2016	2	2.36	2.36	2.36	0	29	Aerial survey	Terry Hughes	Hughes, T. P., J. T. Kerry, and T. Simpson. 2018. Large-scale bleaching of corals on the Great Barrier Reef. Ecology 99:1623	N/A	Terry Hughes	terry.hughes@jcu.edu.au	AA	1	1.91	N/A	N/A	N/A	N/A	-18.625	146.525	1427	6530	10280930	2015-2016	0	0	0
AU_1316	AP	16	Central GBR	51	Australia	Great Barrier Reef	Orpheus (Goolboddi) Island Reef (No 5), 18-049e	-18.5933	146.498	30	3	2016	N/A	1	1-10	5.5	-1	N/A	N/A	0	3/2/2016	2	2.69	2.69	2.69	0	28	Aerial survey	Terry Hughes	Hughes, T. P., J. T. Kerry, and T. Simpson. 2018. Large-scale bleaching of corals on the Great Barrier Reef. Ecology 99:1624	N/A	Terry Hughes	terry.hughes@jcu.edu.au	AA	1	1.74	N/A	N/A	N/A	N/A	-18.575	146.475	1428	6529	10288129	2015-2016	1	0	5.5
AU_1317	AP	16	Central GBR	51	Australia	Great Barrier Reef	Curacoa (Noogoo) Reef (No 1), 18-052a	-18.665	146.563	30	3	2016	N/A	2	30-60	45	-1	N/A	N/A	0	3/2/2016	2	2.67	2.67	2.67	0	28	Aerial survey	Terry Hughes	Hughes, T. P., J. T. Kerry, and T. Simpson. 2018. Large-scale bleaching of corals on the Great Barrier Reef. Ecology 99:1625	N/A	Terry Hughes	terry.hughes@jcu.edu.au	AA	1	2.4	N/A	N/A	N/A	N/A	-18.675	146.575	1426	6531	10273731	2015-2016	2	0	45
AU_1318	AP	16	Central GBR	51	Australia	Great Barrier Reef	Fantome (Eumilli) Island Reef, 18-053	-18.6767	146.512	30	3	2016	N/A	2	10-30	20	-1	N/A	N/A	0	3/2/2016	2	2.55	2.55	2.55	0	28	Aerial survey	Terry Hughes	Hughes, T. P., J. T. Kerry, and T. Simpson. 2018. Large-scale bleaching of corals on the Great Barrier Reef. Ecology 99:1626	N/A	Terry Hughes	terry.hughes@jcu.edu.au	AA	1	2.36	N/A	N/A	N/A	N/A	-18.675	146.525	1426	6530	10273730	2015-2016	2	0	20
AU_1319	AP	16	Central GBR	51	Australia	Great Barrier Reef	Great Palm Island Reef (No 1), 18-054a	-18.7169	146.576	30	3	2016	N/A	2	10-30	20	-1	N/A	N/A	0	3/2/2016	2	2.74	2.74	2.74	0	28	Aerial survey	Terry Hughes	Hughes, T. P., J. T. Kerry, and T. Simpson. 2018. Large-scale bleaching of corals on the Great Barrier Reef. Ecology 99:1627	N/A	Terry Hughes	terry.hughes@jcu.edu.au	AA	1	2.57	N/A	N/A	N/A	N/A	-18.725	146.575	1425	6531	10266531	2015-2016	2	0	20
AU_1320	AP	16	Central GBR	51	Australia	Great Barrier Reef	Great Palm Island Reef (No 2), 18-054b	-18.7654	146.61	30	3	2016	N/A	2	10-30	20	-1	N/A	N/A	0	3/3/2016	2	3.12	3.12	3.12	0	27	Aerial survey	Terry Hughes	Hughes, T. P., J. T. Kerry, and T. Simpson. 2018. Large-scale bleaching of corals on the Great Barrier Reef. Ecology 99:1628	N/A	Terry Hughes	terry.hughes@jcu.edu.au	AA	1	2.65	N/A	N/A	N/A	N/A	-18.775	146.625	1424	6532	10259332	2015-2016	2	0	20
AU_1321	AP	16	Central GBR	51	Australia	Great Barrier Reef	Great Palm Island Reef (No 4), 18-054d	-18.7509	146.692	30	3	2016	N/A	3	>60	80.5	-1	N/A	N/A	0	3/2/2016	2	2.91	2.91	2.91	0	28	Aerial survey	Terry Hughes	Hughes, T. P., J. T. Kerry, and T. Simpson. 2018. Large-scale bleaching of corals on the Great Barrier Reef. Ecology 99:1629	N/A	Terry Hughes	terry.hughes@jcu.edu.au	AA	1	2.34	N/A	N/A	N/A	N/A	-18.775	146.675	1424	6533	10259333	2015-2016	3	0	80.5
AU_1322	AP	16	Central GBR	51	Australia	Great Barrier Reef	Great Palm Island Reef (No 5), 18-054e	-18.7415	146.645	30	3	2016	N/A	3	>60	80.5	-1	N/A	N/A	0	3/2/2016	2	2.72	2.72	2.72	0	28	Aerial survey	Terry Hughes	Hughes, T. P., J. T. Kerry, and T. Simpson. 2018. Large-scale bleaching of corals on the Great Barrier Reef. Ecology 99:1630	N/A	Terry Hughes	terry.hughes@jcu.edu.au	AA	1	2.44	N/A	N/A	N/A	N/A	-18.725	146.625	1425	6532	10266532	2015-2016	3	0	80.5
AU_1323	AP	16	Central GBR	51	Australia	Great Barrier Reef	Great Palm Island Reef (No 6), 18-054f	-18.6951	146.599	30	3	2016	N/A	3	>60	80.5	-1	N/A	N/A	0	3/2/2016	2	2.67	2.67	2.67	0	28	Aerial survey	Terry Hughes	Hughes, T. P., J. T. Kerry, and T. Simpson. 2018. Large-scale bleaching of corals on the Great Barrier Reef. Ecology 99:1631	N/A	Terry Hughes	terry.hughes@jcu.edu.au	AA	1	2.4	N/A	N/A	N/A	N/A	-18.675	146.575	1426	6531	10273731	2015-2016	3	0	80.5
AU_1324	AP	16	Central GBR	51	Australia	Great Barrier Reef	Esk (Soopun) Reef, 18-059	-18.7742	146.521	30	3	2016	N/A	1	1-10	5.5	-1	N/A	N/A	0	3/2/2016	2	2.92	2.92	2.92	0	28	Aerial survey	Terry Hughes	Hughes, T. P., J. T. Kerry, and T. Simpson. 2018. Large-scale bleaching of corals on the Great Barrier Reef. Ecology 99:1632	N/A	Terry Hughes	terry.hughes@jcu.edu.au	AA	1	2.22	N/A	N/A	N/A	N/A	-18.775	146.525	1424	6530	10259330	2015-2016	1	0	5.5
AU_1325	AP	16	Central GBR	51	Australia	Great Barrier Reef	Havannah Reef, 18-065	-18.843	146.538	30	3	2016	N/A	2	10-30	20	-1	N/A	N/A	0	3/3/2016	2	3.47	3.47	3.47	0	27	Aerial survey	Terry Hughes	Hughes, T. P., J. T. Kerry, and T. Simpson. 2018. Large-scale bleaching of corals on the Great Barrier Reef. Ecology 99:1633	N/A	Terry Hughes	terry.hughes@jcu.edu.au	AA	1	2.56	N/A	N/A	N/A	N/A	-18.825	146.525	1423	6530	10252130	2015-2016	2	0	20
AU_1326	AP	16	Central GBR	51	Australia	Great Barrier Reef	Backnumbers Reef, 18-069a	-18.5088	147.148	30	3	2016	N/A	2	30-60	45	-1	N/A	N/A	0	3/31/2016	0	2.86	2.86	3.01	0	N/A	Aerial survey	Terry Hughes	Hughes, T. P., J. T. Kerry, and T. Simpson. 2018. Large-scale bleaching of corals on the Great Barrier Reef. Ecology 99:1634	N/A	Terry Hughes	terry.hughes@jcu.edu.au	AA	1	2.6	N/A	N/A	N/A	N/A	-18.525	147.125	1429	6542	10295342	2015-2016	2	0	45
AU_1327	AP	16	Central GBR	51	Australia	Great Barrier Reef	Braggs Reef, 18-069b	-18.5473	147.14	30	3	2016	N/A	2	10-30	20	-1	N/A	N/A	0	3/31/2016	0	2.86	2.86	3.01	0	N/A	Aerial survey	Terry Hughes	Hughes, T. P., J. T. Kerry, and T. Simpson. 2018. Large-scale bleaching of corals on the Great Barrier Reef. Ecology 99:1635	N/A	Terry Hughes	terry.hughes@jcu.edu.au	AA	1	2.6	N/A	N/A	N/A	N/A	-18.525	147.125	1429	6542	10295342	2015-2016	2	0	20
AU_1328	AP	16	Central GBR	51	Australia	Great Barrier Reef	Arc Reef, 18-070	-18.497	147.445	30	3	2016	N/A	2	30-60	45	-1	N/A	N/A	0	3/30/2016	1	5.66	5.66	5.66	0	N/A	Aerial survey	Terry Hughes	Hughes, T. P., J. T. Kerry, and T. Simpson. 2018. Large-scale bleaching of corals on the Great Barrier Reef. Ecology 99:1636	N/A	Terry Hughes	terry.hughes@jcu.edu.au	AA	1	2.76	N/A	N/A	N/A	N/A	-18.475	147.425	1430	6548	10302548	2015-2016	2	0	45
AU_1329	AP	16	Central GBR	51	Australia	Great Barrier Reef	Glow Reef, 18-071	-18.5281	147.403	30	3	2016	N/A	2	10-30	20	-1	N/A	N/A	0	3/30/2016	1	5.09	5.09	5.09	0	N/A	Aerial survey	Terry Hughes	Hughes, T. P., J. T. Kerry, and T. Simpson. 2018. Large-scale bleaching of corals on the Great Barrier Reef. Ecology 99:1637	N/A	Terry Hughes	terry.hughes@jcu.edu.au	AA	1	2.42	N/A	N/A	N/A	N/A	-18.525	147.425	1429	6548	10295348	2015-2016	2	0	20
AU_1330	AP	16	Central GBR	51	Australia	Great Barrier Reef	John Brewer Reef, 18-075	-18.6311	147.053	30	3	2016	N/A	2	10-30	20	-1	N/A	N/A	0	3/2/2016	2	1.92	1.92	1.92	0	28	Aerial survey	Terry Hughes	Hughes, T. P., J. T. Kerry, and T. Simpson. 2018. Large-scale bleaching of corals on the Great Barrier Reef. Ecology 99:1638	N/A	Terry Hughes	terry.hughes@jcu.edu.au	AA	1	2.17	N/A	N/A	N/A	N/A	-18.625	147.075	1427	6541	10280941	2015-2016	2	0	20
AU_1331	AP	16	Central GBR	51	Australia	Great Barrier Reef	Grub Reef, 18-077	-18.6255	147.426	30	3	2016	N/A	2	30-60	45	-1	N/A	N/A	0	3/23/2016	2	3.6	3.6	3.6	0	7	Aerial survey	Terry Hughes	Hughes, T. P., J. T. Kerry, and T. Simpson. 2018. Large-scale bleaching of corals on the Great Barrier Reef. Ecology 99:1639	N/A	Terry Hughes	terry.hughes@jcu.edu.au	AA	1	2.36	N/A	N/A	N/A	N/A	-18.625	147.425	1427	6548	10280948	2015-2016	2	0	45
AU_1332	AP	16	Central GBR	51	Australia	Great Barrier Reef	Lodestone Reef, 18-078	-18.6902	147.103	30	3	2016	N/A	2	10-30	20	-1	N/A	N/A	0	3/2/2016	2	1.79	1.79	1.79	0	28	Aerial survey	Terry Hughes	Hughes, T. P., J. T. Kerry, and T. Simpson. 2018. Large-scale bleaching of corals on the Great Barrier Reef. Ecology 99:1640	N/A	Terry Hughes	terry.hughes@jcu.edu.au	AA	1	2.08	N/A	N/A	N/A	N/A	-18.675	147.125	1426	6542	10273742	2015-2016	2	0	20
AU_1333	AP	16	Central GBR	51	Australia	Great Barrier Reef	Cup Reef (North), 18-084a	-18.6074	147.633	30	3	2016	N/A	2	30-60	45	-1	N/A	N/A	0	3/24/2016	2	4.39	4.39	4.39	0	6	Aerial survey	Terry Hughes	Hughes, T. P., J. T. Kerry, and T. Simpson. 2018. Large-scale bleaching of corals on the Great Barrier Reef. Ecology 99:1641	N/A	Terry Hughes	terry.hughes@jcu.edu.au	AA	1	2.34	N/A	N/A	N/A	N/A	-18.625	147.625	1427	6552	10280952	2015-2016	2	0	45
AU_1334	AP	16	Central GBR	51	Australia	Great Barrier Reef	Cup Reef (South), 18-084b	-18.6416	147.598	30	3	2016	N/A	2	30-60	45	-1	N/A	N/A	0	3/24/2016	2	4.36	4.36	4.36	0	6	Aerial survey	Terry Hughes	Hughes, T. P., J. T. Kerry, and T. Simpson. 2018. Large-scale bleaching of corals on the Great Barrier Reef. Ecology 99:1642	N/A	Terry Hughes	terry.hughes@jcu.edu.au	AA	1	2.34	N/A	N/A	N/A	N/A	-18.625	147.575	1427	6551	10280951	2015-2016	2	0	45
AU_1335	AP	16	Central GBR	51	Australia	Great Barrier Reef	Spoon Reef (North), 18-085a	-18.6576	147.566	30	3	2016	N/A	2	30-60	45	-1	N/A	N/A	0	3/23/2016	2	3.5	3.5	3.5	0	7	Aerial survey	Terry Hughes	Hughes, T. P., J. T. Kerry, and T. Simpson. 2018. Large-scale bleaching of corals on the Great Barrier Reef. Ecology 99:1643	N/A	Terry Hughes	terry.hughes@jcu.edu.au	AA	1	2.33	N/A	N/A	N/A	N/A	-18.675	147.575	1426	6551	10273751	2015-2016	2	0	45
AU_1336	AP	16	Central GBR	51	Australia	Great Barrier Reef	Chicken Reef, 18-086	-18.6465	147.717	30	3	2016	N/A	2	10-30	20	-1	N/A	N/A	0	3/24/2016	2	4.5	4.5	4.5	0	6	Aerial survey	Terry Hughes	Hughes, T. P., J. T. Kerry, and T. Simpson. 2018. Large-scale bleaching of corals on the Great Barrier Reef. Ecology 99:1644	N/A	Terry Hughes	terry.hughes@jcu.edu.au	AA	1	2.51	N/A	N/A	N/A	N/A	-18.625	147.725	1427	6554	10280954	2015-2016	2	0	20
AU_1337	AP	16	Central GBR	51	Australia	Great Barrier Reef	Lynchs Reef, 18-091	-18.7698	147.708	30	3	2016	N/A	2	10-30	20	-1	N/A	N/A	0	3/23/2016	2	3.02	3.02	3.02	0	7	Aerial survey	Terry Hughes	Hughes, T. P., J. T. Kerry, and T. Simpson. 2018. Large-scale bleaching of corals on the Great Barrier Reef. Ecology 99:1645	N/A	Terry Hughes	terry.hughes@jcu.edu.au	AA	1	1.97	N/A	N/A	N/A	N/A	-18.775	147.725	1424	6554	10259354	2015-2016	2	0	20
AU_1338	AP	16	Central GBR	51	Australia	Great Barrier Reef	Davies Reef, 18-096	-18.8225	147.645	30	3	2016	N/A	2	10-30	20	-1	N/A	N/A	0	3/2/2016	2	2.3	2.3	2.3	0	28	Aerial survey	Terry Hughes	Hughes, T. P., J. T. Kerry, and T. Simpson. 2018. Large-scale bleaching of corals on the Great Barrier Reef. Ecology 99:1646	N/A	Terry Hughes	terry.hughes@jcu.edu.au	AA	1	2.48	N/A	N/A	N/A	N/A	-18.825	147.625	1423	6552	10252152	2015-2016	2	0	20
AU_1339	AP	16	Central GBR	51	Australia	Great Barrier Reef	(Big) Broadhurst Reef (No 1), 18-100a	-18.907	147.742	30	3	2016	N/A	1	1-10	5.5	-1	N/A	N/A	0	3/3/2016	2	2.6	2.6	2.6	0	27	Aerial survey	Terry Hughes	Hughes, T. P., J. T. Kerry, and T. Simpson. 2018. Large-scale bleaching of corals on the Great Barrier Reef. Ecology 99:1647	N/A	Terry Hughes	terry.hughes@jcu.edu.au	AA	1	1.99	N/A	N/A	N/A	N/A	-18.925	147.725	1421	6554	10237754	2015-2016	1	0	5.5
AU_134	AP	16	Southern GBR	54	Australia	Keppel Islands	Halfway Island (RS)	-23.1998	150.969	7	4	2016	5	1	3.38012	N/A	0	0	N/A	0	2/18/2016	2	0.52	0.52	0.52	0	49	In-situ	Emma Kennedy	N/A	N/A	Emma Kennedy	e.kennedy1@uq.edu.au	AAAA	1	1.42	N/A	N/A	N/A	N/A	-23.175	150.975	1336	6619	9625819	2015-2016	1	0	3.38
AU_1340	AP	16	Central GBR	51	Australia	Great Barrier Reef	(Big) Broadhurst Reef (No 2), 18-100b	-18.8633	147.694	30	3	2016	N/A	1	1-10	5.5	-1	N/A	N/A	0	3/3/2016	2	2.42	2.42	2.42	0	27	Aerial survey	Terry Hughes	Hughes, T. P., J. T. Kerry, and T. Simpson. 2018. Large-scale bleaching of corals on the Great Barrier Reef. Ecology 99:1648	N/A	Terry Hughes	terry.hughes@jcu.edu.au	AA	1	2.01	N/A	N/A	N/A	N/A	-18.875	147.675	1422	6553	10244953	2015-2016	1	0	5.5
AU_1341	AP	16	Central GBR	51	Australia	Great Barrier Reef	(Little) Broadhurst Reef, 18-106	-18.9559	147.694	30	3	2016	N/A	1	1-10	5.5	-1	N/A	N/A	0	3/2/2016	2	2.1	2.1	2.1	0	28	Aerial survey	Terry Hughes	Hughes, T. P., J. T. Kerry, and T. Simpson. 2018. Large-scale bleaching of corals on the Great Barrier Reef. Ecology 99:1649	N/A	Terry Hughes	terry.hughes@jcu.edu.au	AA	1	2.18	N/A	N/A	N/A	N/A	-18.975	147.675	1420	6553	10230553	2015-2016	1	0	5.5
AU_1342	AP	16	Central GBR	51	Australia	Great Barrier Reef	Bay Rock, 19-007	-19.1189	146.753	30	3	2016	N/A	2	30-60	45	-1	N/A	N/A	0	3/3/2016	2	5.54	5.54	5.54	0	27	Aerial survey	Terry Hughes	Hughes, T. P., J. T. Kerry, and T. Simpson. 2018. Large-scale bleaching of corals on the Great Barrier Reef. Ecology 99:1650	N/A	Terry Hughes	terry.hughes@jcu.edu.au	AA	1	3.8	N/A	N/A	N/A	N/A	-19.125	146.775	1417	6535	10208935	2015-2016	2	0	45
AU_1343	AP	16	Central GBR	51	Australia	Great Barrier Reef	Cockle Bay Reef, 19-009a	-19.1682	146.81	30	3	2016	N/A	2	10-30	20	-1	N/A	N/A	0	3/3/2016	2	5.88	5.88	5.88	0	27	Aerial survey	Terry Hughes	Hughes, T. P., J. T. Kerry, and T. Simpson. 2018. Large-scale bleaching of corals on the Great Barrier Reef. Ecology 99:1651	N/A	Terry Hughes	terry.hughes@jcu.edu.au	AA	1	3.98	N/A	N/A	N/A	N/A	-19.175	146.825	1416	6536	10201736	2015-2016	2	0	20
AU_1344	AP	16	Central GBR	51	Australia	Great Barrier Reef	Magnetic Island Reef (No 6), 19-009g	-19.1163	146.815	30	3	2016	N/A	2	10-30	20	-1	N/A	N/A	0	3/3/2016	2	5.19	5.19	5.19	0	27	Aerial survey	Terry Hughes	Hughes, T. P., J. T. Kerry, and T. Simpson. 2018. Large-scale bleaching of corals on the Great Barrier Reef. Ecology 99:1652	N/A	Terry Hughes	terry.hughes@jcu.edu.au	AA	1	3.67	N/A	N/A	N/A	N/A	-19.125	146.825	1417	6536	10208936	2015-2016	2	0	20
AU_1345	AP	16	Central GBR	51	Australia	Great Barrier Reef	Magnetic Island Reef (No 8), 19-009j	-19.1194	146.789	30	3	2016	N/A	2	30-60	45	-1	N/A	N/A	0	3/3/2016	2	5.54	5.54	5.54	0	27	Aerial survey	Terry Hughes	Hughes, T. P., J. T. Kerry, and T. Simpson. 2018. Large-scale bleaching of corals on the Great Barrier Reef. Ecology 99:1653	N/A	Terry Hughes	terry.hughes@jcu.edu.au	AA	1	3.8	N/A	N/A	N/A	N/A	-19.125	146.775	1417	6535	10208935	2015-2016	2	0	45
AU_1346	AP	16	Central GBR	51	Australia	Great Barrier Reef	U/N Reef, 19-010	-19.1853	146.835	30	3	2016	N/A	2	10-30	20	-1	N/A	N/A	0	3/3/2016	2	5.88	5.88	5.88	0	27	Aerial survey	Terry Hughes	Hughes, T. P., J. T. Kerry, and T. Simpson. 2018. Large-scale bleaching of corals on the Great Barrier Reef. Ecology 99:1654	N/A	Terry Hughes	terry.hughes@jcu.edu.au	AA	1	3.98	N/A	N/A	N/A	N/A	-19.175	146.825	1416	6536	10201736	2015-2016	2	0	20
AU_1347	AP	16	Central GBR	51	Australia	Great Barrier Reef	Middle Reef, 19-011	-19.1977	146.815	30	3	2016	N/A	3	>60	80.5	-1	N/A	N/A	0	3/3/2016	2	5.88	5.88	5.88	0	27	Aerial survey	Terry Hughes	Hughes, T. P., J. T. Kerry, and T. Simpson. 2018. Large-scale bleaching of corals on the Great Barrier Reef. Ecology 99:1655	N/A	Terry Hughes	terry.hughes@jcu.edu.au	AA	1	3.98	N/A	N/A	N/A	N/A	-19.175	146.825	1416	6536	10201736	2015-2016	3	0	80.5
AU_1348	AP	18	Christmas Island, Australia	23	Australia	Christmas Island	Flying Fish Cove	-10.428	105.669	20	5	2016	10	3	86	N/A	-1	N/A	N/A	0	4/14/2016	2	10.33	8.4	10.33	0	36	In-situ	Jennie Mallela	N/A	N/A	Jennie Mallela	j_mallela@yahoo.com	AA	1	1.43	N/A	N/A	N/A	N/A	-10.425	105.675	1591	5713	11460913	2015-2016	3	0	86
AU_1349	AP	18	Christmas Island, Australia	23	Australia	Christmas Island	Eidsvold	-10.441	105.659	20	5	2016	10	2	27	N/A	-1	N/A	N/A	0	4/14/2016	2	10.33	8.4	10.33	0	36	In-situ	Jennie Mallela	N/A	N/A	Jennie Mallela	j_mallela@yahoo.com	AA	1	1.43	N/A	N/A	N/A	N/A	-10.425	105.675	1591	5713	11460913	2015-2016	2	0	27
AU_135	AP	16	Southern GBR	54	Australia	Keppel Islands	Surprise Rock	-23.1646	150.923	7	4	2016	5	1	3.33746	N/A	0	0	N/A	0	2/18/2016	2	0.53	0.53	0.53	0	49	In-situ	Emma Kennedy	N/A	N/A	Emma Kennedy	e.kennedy1@uq.edu.au	AAAA	1	1.38	N/A	N/A	N/A	N/A	-23.175	150.925	1336	6618	9625818	2015-2016	1	0	3.337
AU_1350	AP	18	Christmas Island, Australia	23	Australia	Christmas Island	Million Dollar Bommie	-10.461	105.625	20	5	2016	10	3	67	N/A	-1	N/A	N/A	0	4/14/2016	2	9.76	8.14	9.76	0	36	In-situ	Jennie Mallela	N/A	N/A	Jennie Mallela	j_mallela@yahoo.com	AA	1	1.43	N/A	N/A	N/A	N/A	-10.475	105.625	1590	5712	11453712	2015-2016	3	0	67
AU_1351	AP	18	Christmas Island, Australia	23	Australia	Christmas Island	Boat Cave	-10.442	105.559	20	5	2016	10	1	9	N/A	-1	N/A	N/A	0	4/14/2016	2	9.55	7.9	9.55	0	36	In-situ	Jennie Mallela	N/A	N/A	Jennie Mallela	j_mallela@yahoo.com	AA	1	1.29	N/A	N/A	N/A	N/A	-10.425	105.575	1591	5711	11460911	2015-2016	1	0	9
AU_1352	AP	18	Christmas Island, Australia	23	Australia	Christmas Island	Winifred	-10.497	105.545	20	5	2016	10	3	76	N/A	-1	N/A	N/A	0	4/14/2016	2	9.38	7.74	9.38	0	36	In-situ	Jennie Mallela	N/A	N/A	Jennie Mallela	j_mallela@yahoo.com	AA	1	1.3	N/A	N/A	N/A	N/A	-10.475	105.525	1590	5710	11453710	2015-2016	3	0	76
AU_1353	AP	18	Pulu Keeling, Australia	139	Australia	Cocos Keeling	Rosewall	-12.0931	96.842	27	5	2016	8	1	3	N/A	-1	N/A	N/A	0	4/21/2016	2	10.25	7.39	10.25	0	29	In-situ	Jennie Mallela	N/A	N/A	Jennie Mallela	j_mallela@yahoo.com	AA	1	6.86	N/A	N/A	N/A	N/A	-12.075	96.825	1558	5536	11223136	2015-2016	1	0	3
AU_1354	AP	18	Pulu Keeling, Australia	139	Australia	Cocos Keeling	Cabbage patch	-12.0952	96.8423	27	5	2016	3	1	1	N/A	-1	N/A	N/A	0	4/21/2016	2	10.25	7.39	10.25	0	29	In-situ	Jennie Mallela	N/A	N/A	Jennie Mallela	j_mallela@yahoo.com	AA	1	6.86	N/A	N/A	N/A	N/A	-12.075	96.825	1558	5536	11223136	2015-2016	1	0	1
AU_1355	AP	18	Pulu Keeling, Australia	139	Australia	Cocos Keeling	Horsburgh	-12.0831	96.8334	27	5	2016	8	1	6	N/A	-1	N/A	N/A	0	4/21/2016	2	10.25	7.39	10.25	0	29	In-situ	Jennie Mallela	N/A	N/A	Jennie Mallela	j_mallela@yahoo.com	AA	1	6.86	N/A	N/A	N/A	N/A	-12.075	96.825	1558	5536	11223136	2015-2016	1	0	6
AU_1356	AP	18	Pulu Keeling, Australia	139	Australia	Cocos Keeling	100th	-12.1069	96.8709	27	5	2016	7	0	0	N/A	-1	N/A	N/A	0	4/28/2016	2	10.88	8	10.88	0	29	In-situ	Jennie Mallela	N/A	N/A	Jennie Mallela	j_mallela@yahoo.com	AA	1	6.8	N/A	N/A	N/A	N/A	-12.125	96.875	1557	5537	11215937	2015-2016	0	0	0
AU_1357	AP	19	Ningaloo	100	Australia	Western Australia,	South Mandu Reef - South Mandu Reef 2 (Fringing reef seaward) Site 1	-22.1483	113.867	27	2	2016	2	1	8.75	N/A	0	0	N/A	0	6/1/2015	2	0	0	0.14	0	353	In-situ	Reef Check database	N/A	% coral mortality (where given) calculated as % of (total number of recently killed coral colonies/total of hard coral colonies). % coral bleaching and % coral mortality for each observation calculated as mean values across the four segments.	Reef Check Australia,	N/A	AAAA	3	0.34	N/A	N/A	N/A	N/A	-22.125	113.875	1357	5877	9776277	2015-2016	1	0	8.75
AU_1358	AP	19	Ningaloo	100	Australia	Western Australia,	South Mandu Reef - South Mandu Reef 1 (Fringing reef seaward) Site 1	-22.1486	113.868	27	2	2016	2	1	0.5	N/A	1	4.17	N/A	0	6/1/2015	2	0	0	0.14	0	353	In-situ	Reef Check database	N/A	% coral mortality (where given) calculated as % of (total number of recently killed coral colonies/total of hard coral colonies). % coral bleaching and % coral mortality for each observation calculated as mean values across the four segments.	Reef Check Australia,	N/A	AAAA	3	0.34	N/A	N/A	N/A	N/A	-22.125	113.875	1357	5877	9776277	2015-2016	1	0	0.5
AU_1359	AP	19	Ningaloo	100	Australia	N/A	Oyster Stacks - Oyster Stacks South (Fringing reef seaward) Site 1	-22.1347	113.876	25	2	2016	2	1	2.75	N/A	0	0	N/A	0	6/1/2015	2	0	0	0.14	0	351	In-situ	Reef Check database	N/A	% coral mortality (where given) calculated as % of (total number of recently killed coral colonies/total of hard coral colonies). % coral bleaching and % coral mortality for each observation calculated as mean values across the four segments.	Reef Check Australia,	N/A	AAAA	3	0.34	N/A	N/A	N/A	N/A	-22.125	113.875	1357	5877	9776277	2015-2016	1	0	2.75
AU_136	AP	16	Southern GBR	54	Australia	Keppel Islands	Bald rock	-23.1722	150.999	7	4	2016	8	1	1.89279	N/A	0	0	N/A	0	2/18/2016	2	0.52	0.52	0.52	0	49	In-situ	Emma Kennedy	N/A	N/A	Emma Kennedy	e.kennedy1@uq.edu.au	AAAA	1	1.42	N/A	N/A	N/A	N/A	-23.175	150.975	1336	6619	9625819	2015-2016	1	0	1.893
AU_1360	AP	19	Ningaloo	100	Australia	N/A	Oyster Stacks - Oyster Stacks South (Fringing reef seaward) Site 2	-22.1347	113.876	28	2	2016	2	2	12.5	N/A	0	0	N/A	0	6/1/2015	2	0	0	0.14	0	354	In-situ	Reef Check database	N/A	% coral mortality (where given) calculated as % of (total number of recently killed coral colonies/total of hard coral colonies). % coral bleaching and % coral mortality for each observation calculated as mean values across the four segments.	Reef Check Australia,	N/A	AAAA	3	0.34	N/A	N/A	N/A	N/A	-22.125	113.875	1357	5877	9776277	2015-2016	2	0	12.5
AU_1361	AP	19	Ningaloo	100	Australia	Western Australia,	Oyster Stacks - Oyster Stacks South (Fringing reef seaward) Site 1	-22.1322	113.877	28	2	2016	2	2	45	N/A	1	7.69	N/A	0	6/1/2015	2	0	0	0.14	0	354	In-situ	Reef Check database	N/A	% coral mortality (where given) calculated as % of (total number of recently killed coral colonies/total of hard coral colonies). % coral bleaching and % coral mortality for each observation calculated as mean values across the four segments.	Reef Check Australia,	N/A	AAAA	3	0.34	N/A	N/A	N/A	N/A	-22.125	113.875	1357	5877	9776277	2015-2016	2	0	45
AU_1362	AP	19	Ningaloo	100	Australia	Western Australia,	Oyster Stacks - Oyster Stacks North (Fringing reef seaward) Site 1	-22.131	113.877	24	2	2016	1	1	2.25	N/A	0	0	N/A	0	6/1/2015	2	0	0	0.14	0	350	In-situ	Reef Check database	N/A	% coral mortality (where given) calculated as % of (total number of recently killed coral colonies/total of hard coral colonies). % coral bleaching and % coral mortality for each observation calculated as mean values across the four segments.	Reef Check Australia,	N/A	AAAA	3	0.34	N/A	N/A	N/A	N/A	-22.125	113.875	1357	5877	9776277	2015-2016	1	0	2.25
AU_1363	AP	19	Ningaloo	100	Australia	N/A	Oyster Stacks - Oyster Stacks North (Fringing reef seaward) Site 2	-22.131	113.877	24	2	2016	2	2	11.25	N/A	0	0	N/A	0	6/1/2015	2	0	0	0.14	0	350	In-situ	Reef Check database	N/A	% coral mortality (where given) calculated as % of (total number of recently killed coral colonies/total of hard coral colonies). % coral bleaching and % coral mortality for each observation calculated as mean values across the four segments.	Reef Check Australia,	N/A	AAAA	3	0.34	N/A	N/A	N/A	N/A	-22.125	113.875	1357	5877	9776277	2015-2016	2	0	11.25
AU_1364	AP	16	Northern GBR	53	Australia	Queensland, Port Douglas	Opal Reef - Bashful Bommie (Back reef slope) Site 1	-16.2417	145.864	30	8	2015	8	2	28.75	N/A	0	0	N/A	0	3/25/2016	0	0	0	5.82	0	N/A	In-situ	Reef Check database	N/A	% coral mortality (where given) calculated as % of (total number of recently killed coral colonies/total of hard coral colonies). % coral bleaching and % coral mortality for each observation calculated as mean values across the four segments.	Reef Check Australia,	N/A	AAAA	3	1.42	N/A	N/A	N/A	N/A	-16.225	145.875	1475	6517	10626517	2015-2016	2	0	28.75
AU_1365	AP	16	Northern GBR	53	Australia	Queensland, Port Douglas	Low Isles Reef - Low Isles (Fringing reef leeward) Site 1	-16.3772	145.558	2	8	2015	4	1	2	N/A	0	0	N/A	0	3/1/2016	0	0	0	2.62	0	N/A	In-situ	Reef Check database	N/A	% coral mortality (where given) calculated as % of (total number of recently killed coral colonies/total of hard coral colonies). % coral bleaching and % coral mortality for each observation calculated as mean values across the four segments.	Reef Check Australia,	N/A	AAAA	3	1.5	N/A	N/A	N/A	N/A	-16.375	145.575	1472	6511	10604911	2015-2016	1	0	2
AU_1366	AP	16	Northern GBR	53	Australia	Queensland, Port Douglas	Agincourt Reef - Agincourt 3D (Pontoon) (Back reef slope) Site 1	-15.9829	145.822	29	8	2015	6	2	13.75	N/A	0	0	N/A	0	3/28/2016	0	0	0	6.06	0	N/A	In-situ	Reef Check database	N/A	% coral mortality (where given) calculated as % of (total number of recently killed coral colonies/total of hard coral colonies). % coral bleaching and % coral mortality for each observation calculated as mean values across the four segments.	Reef Check Australia,	N/A	AAAA	3	1.13	N/A	N/A	N/A	N/A	-15.975	145.825	1480	6516	10662516	2015-2016	2	0	13.75
AU_1367	AP	16	Northern GBR	53	Australia	Queensland, Port Douglas	Agincourt Reef - Agincourt 3D (Pontoon) (Back reef slope) Site 2	-15.983	145.822	29	8	2015	6	2	22.5	N/A	0	0	N/A	0	3/28/2016	0	0	0	6.06	0	N/A	In-situ	Reef Check database	N/A	% coral mortality (where given) calculated as % of (total number of recently killed coral colonies/total of hard coral colonies). % coral bleaching and % coral mortality for each observation calculated as mean values across the four segments.	Reef Check Australia,	N/A	AAAA	3	1.13	N/A	N/A	N/A	N/A	-15.975	145.825	1480	6516	10662516	2015-2016	2	0	22.5
AU_1368	AP	16	Northern GBR	53	Australia	Queensland,	Opal Reef - SNO (South North Opal) (Back reef crest) Site 1	-16.25	145.833	30	8	2015	6	1	3.25	N/A	0	0	N/A	0	3/23/2016	0	0	0	5.05	0	N/A	In-situ	Reef Check database	N/A	% coral mortality (where given) calculated as % of (total number of recently killed coral colonies/total of hard coral colonies). % coral bleaching and % coral mortality for each observation calculated as mean values across the four segments.	Reef Check Australia,	N/A	AAAA	3	1.41	N/A	N/A	N/A	N/A	-16.225	145.825	1475	6516	10626516	2015-2016	1	0	3.25
AU_1369	AP	16	Northern GBR	53	Australia	N/A	Norman Reef - Norman Reef Middle Mooring (Back reef wall) Site 1	-16.4208	145.996	26	7	2014	6	1	1	N/A	0	0	N/A	0	3/6/2015	0	0	0	1.62	0	N/A	In-situ	Reef Check database	N/A	% coral mortality (where given) calculated as % of (total number of recently killed coral colonies/total of hard coral colonies). % coral bleaching and % coral mortality for each observation calculated as mean values across the four segments.	Reef Check Australia,	N/A	AAAA	3	N/A	N/A	N/A	N/A	N/A	-16.425	145.975	1471	6519	10597719	2014-2015	1	0	1
AU_137	AP	16	Southern GBR	54	Australia	Keppel Islands	Barron Island (RS)	-23.1576	151.072	8	4	2016	5	1	7.19162	N/A	0	0	N/A	0	2/2/2016	2	0.36	0.36	0.36	0	66	In-situ	Emma Kennedy	N/A	N/A	Emma Kennedy	e.kennedy1@uq.edu.au	AAAA	1	1.46	N/A	N/A	N/A	N/A	-23.175	151.075	1336	6621	9625821	2015-2016	1	0	7.192
AU_1370	AP	16	Northern GBR	53	Australia	N/A	Norman Reef - Norman Reef Middle Mooring (Back reef wall) Site 1	-16.4208	145.996	13	9	2015	5	1	8.75	N/A	-1	N/A	N/A	0	3/26/2016	0	0	0	6.21	0	N/A	In-situ	Reef Check database	N/A	% coral mortality (where given) calculated as % of (total number of recently killed coral colonies/total of hard coral colonies). % coral bleaching and % coral mortality for each observation calculated as mean values across the four segments.	Reef Check Australia,	N/A	AA	3	1.62	N/A	N/A	N/A	N/A	-16.425	145.975	1471	6519	10597719	2015-2016	1	0	8.75
AU_1371	AP	16	Northern GBR	53	Australia	Queensland,	Hastings Reef - North Hastings B (Back reef wall) Site 1	-16.5125	146.001	13	9	2015	5	1	3.25	N/A	1	2.38	N/A	0	3/25/2016	0	0	0	5.29	0	N/A	In-situ	Reef Check database	N/A	% coral mortality (where given) calculated as % of (total number of recently killed coral colonies/total of hard coral colonies). % coral bleaching and % coral mortality for each observation calculated as mean values across the four segments.	Reef Check Australia,	N/A	AAAA	3	1.63	N/A	N/A	N/A	N/A	-16.525	146.025	1469	6520	10583320	2015-2016	1	0	3.25
AU_1372	AP	16	Northern GBR	53	Australia	N/A	Hastings Reef - North Hastings The Point (Back reef wall) Site 1	-16.5001	146.017	27	7	2014	6	1	1	N/A	1	4.26	N/A	0	3/6/2015	0	0	0	1.63	0	N/A	In-situ	Reef Check database	N/A	% coral mortality (where given) calculated as % of (total number of recently killed coral colonies/total of hard coral colonies). % coral bleaching and % coral mortality for each observation calculated as mean values across the four segments.	Reef Check Australia,	N/A	AAAA	3	N/A	N/A	N/A	N/A	N/A	-16.525	146.025	1469	6520	10583320	2014-2015	1	0	1
AU_1373	AP	16	Northern GBR	53	Australia	Queensland,	Moore Reef - Reef Magic Pontoon (Back reef slope) Site 1	-16.8725	146.204	27	7	2014	5	1	1.5	N/A	1	1.84	N/A	0	3/6/2015	0	0	0	1.86	0	N/A	In-situ	Reef Check database	N/A	% coral mortality (where given) calculated as % of (total number of recently killed coral colonies/total of hard coral colonies). % coral bleaching and % coral mortality for each observation calculated as mean values across the four segments.	Reef Check Australia,	N/A	AAAA	3	N/A	N/A	N/A	N/A	N/A	-16.875	146.225	1462	6524	10532924	2014-2015	1	0	1.5
AU_1374	AP	16	Northern GBR	53	Australia	Queensland,	Moore Reef - Reef Magic Pontoon (Back reef slope) Site 1	-16.8725	146.204	12	9	2015	3	3	67.5	N/A	-1	N/A	N/A	0	3/3/2016	0	0	0	3.01	0	N/A	In-situ	Reef Check database	N/A	% coral mortality (where given) calculated as % of (total number of recently killed coral colonies/total of hard coral colonies). % coral bleaching and % coral mortality for each observation calculated as mean values across the four segments.	Reef Check Australia,	N/A	AA	3	1.86	N/A	N/A	N/A	N/A	-16.875	146.225	1462	6524	10532924	2015-2016	3	0	67.5
AU_1375	AP	16	Central GBR	51	Australia	Queensland, Townsville	Magnetic Island Reefs - Nelly Bay (Fringing reef leeward) Site 2	-19.1692	146.847	11	6	2014	5	1	1.25	N/A	1	7.89	N/A	0	3/6/2015	0	0	0	3.98	0	N/A	In-situ	Reef Check database	N/A	% coral mortality (where given) calculated as % of (total number of recently killed coral colonies/total of hard coral colonies). % coral bleaching and % coral mortality for each observation calculated as mean values across the four segments.	Reef Check Australia,	N/A	AAAA	3	N/A	N/A	N/A	N/A	N/A	-19.175	146.825	1416	6536	10201736	2014-2015	1	0	1.25
AU_1377	AP	16	Central GBR	51	Australia	Queensland,	Magnetic Island Reefs - Middle Reef (Fringing reef seaward) Site 2	-19.1981	146.815	25	7	2015	3	1	6.5	N/A	-1	N/A	N/A	0	3/3/2016	0	0	0	5.88	0	N/A	In-situ	Reef Check database	N/A	% coral mortality (where given) calculated as % of (total number of recently killed coral colonies/total of hard coral colonies). % coral bleaching and % coral mortality for each observation calculated as mean values across the four segments.	Reef Check Australia,	N/A	AA	3	3.98	N/A	N/A	N/A	N/A	-19.175	146.825	1416	6536	10201736	2015-2016	1	0	6.5
AU_1379	AP	16	Central GBR	51	Australia	Queensland, Townsville	Magnetic Island Reefs - Middle Reef (Fringing reef seaward) Site 1	-19.1983	146.815	25	7	2015	4	1	8.75	N/A	-1	N/A	N/A	0	3/3/2016	0	0	0	5.88	0	N/A	In-situ	Reef Check database	N/A	% coral mortality (where given) calculated as % of (total number of recently killed coral colonies/total of hard coral colonies). % coral bleaching and % coral mortality for each observation calculated as mean values across the four segments.	Reef Check Australia,	N/A	AA	3	3.98	N/A	N/A	N/A	N/A	-19.175	146.825	1416	6536	10201736	2015-2016	1	0	8.75
AU_138	AP	16	Southern GBR	54	Australia	Keppel Islands	Barron Island (BA2)	-23.1555	151.074	8	4	2016	9	1	3.64603	N/A	0	0	N/A	0	2/2/2016	2	0.36	0.36	0.36	0	66	In-situ	Emma Kennedy	N/A	N/A	Emma Kennedy	e.kennedy1@uq.edu.au	AAAA	1	1.46	N/A	N/A	N/A	N/A	-23.175	151.075	1336	6621	9625821	2015-2016	1	0	3.646
AU_1380	AP	16	Central GBR	51	Australia	Queensland, Magnetic Island	Magnetic Island Reefs - Geoffrey Bay (Fringing reef leeward) Site 1	-19.1542	146.866	26	7	2015	4	2	24.25	N/A	0	0	N/A	0	3/3/2016	0	0	0	5.54	0	N/A	In-situ	Reef Check database	N/A	% coral mortality (where given) calculated as % of (total number of recently killed coral colonies/total of hard coral colonies). % coral bleaching and % coral mortality for each observation calculated as mean values across the four segments.	Reef Check Australia,	N/A	AAAA	3	3.99	N/A	N/A	N/A	N/A	-19.175	146.875	1416	6537	10201737	2015-2016	2	0	24.25
AU_1382	AP	16	Central GBR	51	Australia	Queensland, Magnetic Island	Magnetic Island Reefs - Nelly Bay (Fringing reef leeward) Site 1	-19.1692	146.847	24	10	2015	5	1	2.25	N/A	-1	N/A	N/A	0	3/3/2016	0	0	0	5.88	0	N/A	In-situ	Reef Check database	N/A	% coral mortality (where given) calculated as % of (total number of recently killed coral colonies/total of hard coral colonies). % coral bleaching and % coral mortality for each observation calculated as mean values across the four segments.	Reef Check Australia,	N/A	AA	3	3.98	N/A	N/A	N/A	N/A	-19.175	146.825	1416	6536	10201736	2015-2016	1	0	2.25
AU_1383	AP	16	Central GBR	51	Australia	Queensland,	Magnetic Island Reefs - Alma Bay (Fringing reef leeward) Site 1	-19.1483	146.87	23	8	2014	2	1	0.75	N/A	1	1.22	N/A	0	3/7/2015	0	0	0	3.56	0	N/A	In-situ	Reef Check database	N/A	% coral mortality (where given) calculated as % of (total number of recently killed coral colonies/total of hard coral colonies). % coral bleaching and % coral mortality for each observation calculated as mean values across the four segments.	Reef Check Australia,	N/A	AAAA	3	N/A	N/A	N/A	N/A	N/A	-19.125	146.875	1417	6537	10208937	2014-2015	1	0	0.75
AU_1384	AP	16	Central GBR	51	Australia	Queensland,	Magnetic Island Reefs - Alma Bay (Fringing reef leeward) Site 1	-19.1483	146.87	24	10	2015	4	1	0.75	N/A	-1	N/A	N/A	0	3/3/2016	0	0	0	5.05	0	N/A	In-situ	Reef Check database	N/A	% coral mortality (where given) calculated as % of (total number of recently killed coral colonies/total of hard coral colonies). % coral bleaching and % coral mortality for each observation calculated as mean values across the four segments.	Reef Check Australia,	N/A	AA	3	3.56	N/A	N/A	N/A	N/A	-19.125	146.875	1417	6537	10208937	2015-2016	1	0	0.75
AU_1385	AP	16	Central GBR	51	Australia	Queensland,	Magnetic Island Reefs - Alma Bay (Fringing reef leeward) Site 2	-19.1483	146.87	23	8	2014	4	1	1	N/A	0	0	N/A	0	3/7/2015	0	0	0	3.56	0	N/A	In-situ	Reef Check database	N/A	% coral mortality (where given) calculated as % of (total number of recently killed coral colonies/total of hard coral colonies). % coral bleaching and % coral mortality for each observation calculated as mean values across the four segments.	Reef Check Australia,	N/A	AAAA	3	N/A	N/A	N/A	N/A	N/A	-19.125	146.875	1417	6537	10208937	2014-2015	1	0	1
AU_1386	AP	16	Central GBR	51	Australia	N/A	Magnetic Island Reefs - Florence Bay (Fringing reef leeward) Site 2	-19.1227	146.881	14	6	2014	5	1	1.5	N/A	0	0	N/A	0	3/7/2015	0	0	0	3.56	0	N/A	In-situ	Reef Check database	N/A	% coral mortality (where given) calculated as % of (total number of recently killed coral colonies/total of hard coral colonies). % coral bleaching and % coral mortality for each observation calculated as mean values across the four segments.	Reef Check Australia,	N/A	AAAA	3	N/A	N/A	N/A	N/A	N/A	-19.125	146.875	1417	6537	10208937	2014-2015	1	0	1.5
AU_1387	AP	16	Central GBR	51	Australia	N/A	Magnetic Island Reefs - Florence Bay (Fringing reef leeward) Site 2	-19.1227	146.881	26	7	2015	5	2	13.25	N/A	-1	N/A	N/A	0	3/3/2016	0	0	0	5.05	0	N/A	In-situ	Reef Check database	N/A	% coral mortality (where given) calculated as % of (total number of recently killed coral colonies/total of hard coral colonies). % coral bleaching and % coral mortality for each observation calculated as mean values across the four segments.	Reef Check Australia,	N/A	AA	3	3.56	N/A	N/A	N/A	N/A	-19.125	146.875	1417	6537	10208937	2015-2016	2	0	13.25
AU_1388	AP	16	Central GBR	51	Australia	Queensland, Hayman Island	Hayman Island Reefs - Blue Pearl Bay (Fringing reef leeward) Site 1	-20.039	148.876	12	7	2014	6	0	0.25	N/A	0	0	N/A	0	3/6/2015	0	0	0	2.27	0	N/A	In-situ	Reef Check database	N/A	% coral mortality (where given) calculated as % of (total number of recently killed coral colonies/total of hard coral colonies). % coral bleaching and % coral mortality for each observation calculated as mean values across the four segments.	Reef Check Australia,	N/A	AAAA	3	N/A	N/A	N/A	N/A	N/A	-20.025	148.875	1399	6577	10079377	2014-2015	1	1	0.25
AU_1389	AP	16	Central GBR	51	Australia	Queensland, Hayman Island	Hayman Island Reefs - Blue Pearl Bay (Fringing reef leeward) Site 1	-20.039	148.876	1	10	2015	6	1	4.5	N/A	-1	N/A	N/A	0	3/1/2016	0	0	0	3.36	0	N/A	In-situ	Reef Check database	N/A	% coral mortality (where given) calculated as % of (total number of recently killed coral colonies/total of hard coral colonies). % coral bleaching and % coral mortality for each observation calculated as mean values across the four segments.	Reef Check Australia,	N/A	AA	3	2.27	N/A	N/A	N/A	N/A	-20.025	148.875	1399	6577	10079377	2015-2016	1	0	4.5
AU_139	AP	16	Southern GBR	54	Australia	Keppel Islands	Olive (M3)	-23.1627	150.921	8	4	2016	5	1	7.09832	N/A	0	0	N/A	0	2/18/2016	2	0.53	0.53	0.53	0	50	In-situ	Emma Kennedy	N/A	N/A	Emma Kennedy	e.kennedy1@uq.edu.au	AAAA	1	1.38	N/A	N/A	N/A	N/A	-23.175	150.925	1336	6618	9625818	2015-2016	1	0	7.098
AU_1390	AP	16	Central GBR	51	Australia	Queensland,	Daydream Island - Lovers Cove (Fringing reef leeward) Site 1	-20.2526	148.813	24	10	2014	2	1	6.75	N/A	0	0	N/A	0	2/4/2015	0	0	0	1.08	0	N/A	In-situ	Reef Check database	N/A	% coral mortality (where given) calculated as % of (total number of recently killed coral colonies/total of hard coral colonies). % coral bleaching and % coral mortality for each observation calculated as mean values across the four segments.	Reef Check Australia,	N/A	AAAA	3	N/A	N/A	N/A	N/A	N/A	-20.275	148.825	1394	6576	10043376	2014-2015	1	0	6.75
AU_1391	AP	16	Central GBR	51	Australia	Queensland,	Daydream Island - Mermaids Cove (Fringing reef leeward) Site 1	-20.2504	148.814	24	10	2014	2	0	0.25	N/A	0	0	N/A	0	2/4/2015	0	0	0	1.08	0	N/A	In-situ	Reef Check database	N/A	% coral mortality (where given) calculated as % of (total number of recently killed coral colonies/total of hard coral colonies). % coral bleaching and % coral mortality for each observation calculated as mean values across the four segments.	Reef Check Australia,	N/A	AAAA	3	N/A	N/A	N/A	N/A	N/A	-20.275	148.825	1394	6576	10043376	2014-2015	1	1	0.25
AU_1392	AP	16	Central GBR	51	Australia	N/A	Hayman Island Reefs - Blue Pearl Bay (Fringing reef leeward) Site 2	-20.039	148.876	12	7	2014	5	0	0.25	N/A	0	0	N/A	0	3/6/2015	0	0	0	2.27	0	N/A	In-situ	Reef Check database	N/A	% coral mortality (where given) calculated as % of (total number of recently killed coral colonies/total of hard coral colonies). % coral bleaching and % coral mortality for each observation calculated as mean values across the four segments.	Reef Check Australia,	N/A	AAAA	3	N/A	N/A	N/A	N/A	N/A	-20.025	148.875	1399	6577	10079377	2014-2015	1	1	0.25
AU_1393	AP	16	Central GBR	51	Australia	N/A	Hayman Island Reefs - Blue Pearl Bay (Fringing reef leeward) Site 2	-20.039	148.876	2	10	2015	5	2	12.5	N/A	0	0	N/A	0	3/1/2016	0	0	0	3.36	0	N/A	In-situ	Reef Check database	N/A	% coral mortality (where given) calculated as % of (total number of recently killed coral colonies/total of hard coral colonies). % coral bleaching and % coral mortality for each observation calculated as mean values across the four segments.	Reef Check Australia,	N/A	AAAA	3	2.27	N/A	N/A	N/A	N/A	-20.025	148.875	1399	6577	10079377	2015-2016	2	0	12.5
AU_1394	AP	16	Central GBR	51	Australia	N/A	Hayman Island Reefs - Blue Pearl Bay (Fringing reef leeward) Site 3	-20.039	148.876	2	10	2015	6	2	35	N/A	0	0	N/A	0	3/1/2016	0	0	0	3.36	0	N/A	In-situ	Reef Check database	N/A	% coral mortality (where given) calculated as % of (total number of recently killed coral colonies/total of hard coral colonies). % coral bleaching and % coral mortality for each observation calculated as mean values across the four segments.	Reef Check Australia,	N/A	AAAA	3	2.27	N/A	N/A	N/A	N/A	-20.025	148.875	1399	6577	10079377	2015-2016	2	0	35
AU_1395	AP	16	Southern GBR	54	Australia	N/A	Heron Reef- Heron Bommie (Fringing reef seaward) Site 1	-23.4416	151.905	11	11	2014	6	1	2	N/A	1	3.75	N/A	0	2/2/2015	0	0	0	1	0	N/A	In-situ	Reef Check database	N/A	% coral mortality (where given) calculated as % of (total number of recently killed coral colonies/total of hard coral colonies). % coral bleaching and % coral mortality for each observation calculated as mean values across the four segments.	Reef Check Australia,	N/A	AAAA	3	N/A	N/A	N/A	N/A	N/A	-23.425	151.925	1331	6638	9589838	2014-2015	1	0	2
AU_1396	AP	16	Southern GBR	54	Australia	N/A	Heron Reef- Jetty Flat (Reef flat) Site 1	-23.4431	151.909	11	11	2014	1	1	3.75	N/A	0	0	N/A	0	2/2/2015	0	0	0	1	0	N/A	In-situ	Reef Check database	N/A	% coral mortality (where given) calculated as % of (total number of recently killed coral colonies/total of hard coral colonies). % coral bleaching and % coral mortality for each observation calculated as mean values across the four segments.	Reef Check Australia,	N/A	AAAA	3	N/A	N/A	N/A	N/A	N/A	-23.425	151.925	1331	6638	9589838	2014-2015	1	0	3.75
AU_1397	AP	16	Southern GBR	54	Australia	N/A	Heron Reef- Jetty Flat (Reef flat) Site 1	-23.4431	151.909	27	11	2015	2	1	4.25	N/A	-1	N/A	N/A	0	6/1/2015	2	0	0	0	0	298	In-situ	Reef Check database	N/A	% coral mortality (where given) calculated as % of (total number of recently killed coral colonies/total of hard coral colonies). % coral bleaching and % coral mortality for each observation calculated as mean values across the four segments.	Reef Check Australia,	N/A	AA	3	1	N/A	N/A	N/A	N/A	-23.425	151.925	1331	6638	9589838	2015-2016	1	0	4.25
AU_1398	AP	16	Southern GBR	54	Australia	Queensland	Heron Reef - Cappuccino Express (Reef flat) Site 1	-23.4411	151.911	12	11	2014	1	2	18.75	N/A	1	1.1	N/A	0	2/2/2015	0	0	0	1	0	N/A	In-situ	Reef Check database	N/A	% coral mortality (where given) calculated as % of (total number of recently killed coral colonies/total of hard coral colonies). % coral bleaching and % coral mortality for each observation calculated as mean values across the four segments.	Reef Check Australia,	N/A	AAAA	3	N/A	N/A	N/A	N/A	N/A	-23.425	151.925	1331	6638	9589838	2014-2015	2	0	18.75
AU_1399	AP	16	Southern GBR	54	Australia	Queensland	Heron Reef - Cappuccino Express (Reef flat) Site 1	-23.4411	151.911	25	11	2015	2	1	1	N/A	-1	N/A	N/A	0	6/1/2015	2	0	0	0	0	296	In-situ	Reef Check database	N/A	% coral mortality (where given) calculated as % of (total number of recently killed coral colonies/total of hard coral colonies). % coral bleaching and % coral mortality for each observation calculated as mean values across the four segments.	Reef Check Australia,	N/A	AA	3	1	N/A	N/A	N/A	N/A	-23.425	151.925	1331	6638	9589838	2015-2016	1	0	1
AU_140	AP	16	Southern GBR	54	Australia	Keppel Islands	Big Peninsula beach	-23.1506	150.974	8	4	2016	4	2	16.2752	N/A	0	0	N/A	0	2/18/2016	2	0.52	0.52	0.52	0	50	In-situ	Emma Kennedy	N/A	N/A	Emma Kennedy	e.kennedy1@uq.edu.au	AAAA	1	1.42	N/A	N/A	N/A	N/A	-23.175	150.975	1336	6619	9625819	2015-2016	2	0	16.275
AU_1400	AP	16	Southern GBR	54	Australia	N/A	Heron Reef - Coral Garden (Fringing reef seaward) Site 1	-23.4472	151.912	10	11	2014	7	1	3.25	N/A	1	1.63	N/A	0	2/2/2015	0	0	0	1	0	N/A	In-situ	Reef Check database	N/A	% coral mortality (where given) calculated as % of (total number of recently killed coral colonies/total of hard coral colonies). % coral bleaching and % coral mortality for each observation calculated as mean values across the four segments.	Reef Check Australia,	N/A	AAAA	3	N/A	N/A	N/A	N/A	N/A	-23.425	151.925	1331	6638	9589838	2014-2015	1	0	3.25
AU_1401	AP	16	Southern GBR	54	Australia	N/A	Heron Reef - Coral Garden (Fringing reef seaward) Site 1	-23.4472	151.912	27	11	2015	6	1	0.75	N/A	-1	N/A	N/A	0	6/1/2015	2	0	0	0	0	298	In-situ	Reef Check database	N/A	% coral mortality (where given) calculated as % of (total number of recently killed coral colonies/total of hard coral colonies). % coral bleaching and % coral mortality for each observation calculated as mean values across the four segments.	Reef Check Australia,	N/A	AA	3	1	N/A	N/A	N/A	N/A	-23.425	151.925	1331	6638	9589838	2015-2016	1	0	0.75
AU_1402	AP	16	Southern GBR	54	Australia	N/A	Heron Reef- Research Zone (Reef flat) Site 1	-23.4438	151.913	8	11	2014	2	2	18.5	N/A	0	0	N/A	0	2/2/2015	0	0	0	1	0	N/A	In-situ	Reef Check database	N/A	% coral mortality (where given) calculated as % of (total number of recently killed coral colonies/total of hard coral colonies). % coral bleaching and % coral mortality for each observation calculated as mean values across the four segments.	Reef Check Australia,	N/A	AAAA	3	N/A	N/A	N/A	N/A	N/A	-23.425	151.925	1331	6638	9589838	2014-2015	2	0	18.5
AU_1403	AP	16	Southern GBR	54	Australia	N/A	Heron Reef- Research Zone (Reef flat) Site 1	-23.4438	151.913	24	11	2015	2	0	0.25	N/A	-1	N/A	N/A	0	6/1/2015	2	0	0	0	0	295	In-situ	Reef Check database	N/A	% coral mortality (where given) calculated as % of (total number of recently killed coral colonies/total of hard coral colonies). % coral bleaching and % coral mortality for each observation calculated as mean values across the four segments.	Reef Check Australia,	N/A	AA	3	1	N/A	N/A	N/A	N/A	-23.425	151.925	1331	6638	9589838	2015-2016	1	1	0.25
AU_1404	AP	16	Southern GBR	54	Australia	N/A	Heron Reef - White Wedding (Reef flat) Site 1	-23.4388	151.914	13	11	2014	1	2	42.5	N/A	0	0	N/A	0	2/2/2015	0	0	0	1	0	N/A	In-situ	Reef Check database	N/A	% coral mortality (where given) calculated as % of (total number of recently killed coral colonies/total of hard coral colonies). % coral bleaching and % coral mortality for each observation calculated as mean values across the four segments.	Reef Check Australia,	N/A	AAAA	3	N/A	N/A	N/A	N/A	N/A	-23.425	151.925	1331	6638	9589838	2014-2015	2	0	42.5
AU_1405	AP	16	Southern GBR	54	Australia	N/A	Heron Reef - White Wedding (Reef flat) Site 1	-23.4388	151.914	26	11	2015	2	1	5.75	N/A	-1	N/A	N/A	0	6/1/2015	2	0	0	0	0	297	In-situ	Reef Check database	N/A	% coral mortality (where given) calculated as % of (total number of recently killed coral colonies/total of hard coral colonies). % coral bleaching and % coral mortality for each observation calculated as mean values across the four segments.	Reef Check Australia,	N/A	AA	3	1	N/A	N/A	N/A	N/A	-23.425	151.925	1331	6638	9589838	2015-2016	1	0	5.75
AU_1406	AP	16	Southern GBR	54	Australia	N/A	Heron Reef - Coral Grotto (Back reef slope) Site 1	-23.434	151.918	10	11	2014	7	1	4.25	N/A	0	0	N/A	0	2/2/2015	0	0	0	1	0	N/A	In-situ	Reef Check database	N/A	% coral mortality (where given) calculated as % of (total number of recently killed coral colonies/total of hard coral colonies). % coral bleaching and % coral mortality for each observation calculated as mean values across the four segments.	Reef Check Australia,	N/A	AAAA	3	N/A	N/A	N/A	N/A	N/A	-23.425	151.925	1331	6638	9589838	2014-2015	1	0	4.25
AU_1407	AP	16	Southern GBR	54	Australia	N/A	Heron Reef - Coral Grotto (Back reef slope) Site 1	-23.434	151.918	28	11	2015	6	1	1	N/A	-1	N/A	N/A	0	6/1/2015	2	0	0	0	0	299	In-situ	Reef Check database	N/A	% coral mortality (where given) calculated as % of (total number of recently killed coral colonies/total of hard coral colonies). % coral bleaching and % coral mortality for each observation calculated as mean values across the four segments.	Reef Check Australia,	N/A	AA	3	1	N/A	N/A	N/A	N/A	-23.425	151.925	1331	6638	9589838	2015-2016	1	0	1
AU_1408	AP	16	Southern GBR	54	Australia	N/A	Heron Reef - Half Way (Doug's Place) (Fringing reef seaward) Site 1	-23.4511	151.918	11	11	2014	6	1	4.5	N/A	1	0.99	N/A	0	2/2/2015	0	0	0	0.98	0	N/A	In-situ	Reef Check database	N/A	% coral mortality (where given) calculated as % of (total number of recently killed coral colonies/total of hard coral colonies). % coral bleaching and % coral mortality for each observation calculated as mean values across the four segments.	Reef Check Australia,	N/A	AAAA	3	N/A	N/A	N/A	N/A	N/A	-23.475	151.925	1330	6638	9582638	2014-2015	1	0	4.5
AU_1409	AP	16	Southern GBR	54	Australia	N/A	Heron Reef - Half Way (Doug's Place) (Fringing reef seaward) Site 1	-23.4511	151.918	28	11	2015	5	1	1	N/A	-1	N/A	N/A	0	6/1/2015	2	0	0	0	0	299	In-situ	Reef Check database	N/A	% coral mortality (where given) calculated as % of (total number of recently killed coral colonies/total of hard coral colonies). % coral bleaching and % coral mortality for each observation calculated as mean values across the four segments.	Reef Check Australia,	N/A	AA	3	0.98	N/A	N/A	N/A	N/A	-23.475	151.925	1330	6638	9582638	2015-2016	1	0	1
AU_141	AP	16	Southern GBR	54	Australia	Keppel Islands	Big Peninsula (GK1/"O")	-23.1485	150.975	9	4	2016	8	2	23.7361	N/A	0	0	N/A	0	2/18/2016	2	0.51	0.51	0.51	0	51	In-situ	Emma Kennedy	N/A	N/A	Emma Kennedy	e.kennedy1@uq.edu.au	AAAA	1	1.44	N/A	N/A	N/A	N/A	-23.125	150.975	1337	6619	9633019	2015-2016	2	0	23.736
AU_1410	AP	16	Southern GBR	54	Australia	N/A	Heron Reef- Shark Bay (Reef flat) Site 1	-23.4447	151.918	9	11	2014	1	1	4	N/A	1	4.17	N/A	0	2/2/2015	0	0	0	1	0	N/A	In-situ	Reef Check database	N/A	% coral mortality (where given) calculated as % of (total number of recently killed coral colonies/total of hard coral colonies). % coral bleaching and % coral mortality for each observation calculated as mean values across the four segments.	Reef Check Australia,	N/A	AAAA	3	N/A	N/A	N/A	N/A	N/A	-23.425	151.925	1331	6638	9589838	2014-2015	1	0	4
AU_1411	AP	16	Southern GBR	54	Australia	N/A	Heron Reef- Shark Bay (Reef flat) Site 1	-23.4447	151.918	28	11	2015	2	1	1	N/A	-1	N/A	N/A	0	6/1/2015	2	0	0	0	0	299	In-situ	Reef Check database	N/A	% coral mortality (where given) calculated as % of (total number of recently killed coral colonies/total of hard coral colonies). % coral bleaching and % coral mortality for each observation calculated as mean values across the four segments.	Reef Check Australia,	N/A	AA	3	1	N/A	N/A	N/A	N/A	-23.425	151.925	1331	6638	9589838	2015-2016	1	0	1
AU_1412	AP	16	Southern GBR	54	Australia	Queensland	Heron Reef - Last Resort (Reef flat) Site 1	-23.4425	151.92	10	11	2014	1	1	2.25	N/A	0	0	N/A	0	2/2/2015	0	0	0	1	0	N/A	In-situ	Reef Check database	N/A	% coral mortality (where given) calculated as % of (total number of recently killed coral colonies/total of hard coral colonies). % coral bleaching and % coral mortality for each observation calculated as mean values across the four segments.	Reef Check Australia,	N/A	AAAA	3	N/A	N/A	N/A	N/A	N/A	-23.425	151.925	1331	6638	9589838	2014-2015	1	0	2.25
AU_1413	AP	16	Southern GBR	54	Australia	Queensland	Heron Reef - Last Resort (Reef flat) Site 1	-23.4425	151.92	29	11	2015	2	1	1	N/A	-1	N/A	N/A	0	6/1/2015	2	0	0	0	0	300	In-situ	Reef Check database	N/A	% coral mortality (where given) calculated as % of (total number of recently killed coral colonies/total of hard coral colonies). % coral bleaching and % coral mortality for each observation calculated as mean values across the four segments.	Reef Check Australia,	N/A	AA	3	1	N/A	N/A	N/A	N/A	-23.425	151.925	1331	6638	9589838	2015-2016	1	0	1
AU_1414	AP	16	Southern GBR	54	Australia	N/A	Heron Reef - Blue Pools (Back reef slope) Site 1	-23.4346	151.922	12	11	2014	5	1	1.5	N/A	0	0	N/A	0	2/2/2015	0	0	0	1	0	N/A	In-situ	Reef Check database	N/A	% coral mortality (where given) calculated as % of (total number of recently killed coral colonies/total of hard coral colonies). % coral bleaching and % coral mortality for each observation calculated as mean values across the four segments.	Reef Check Australia,	N/A	AAAA	3	N/A	N/A	N/A	N/A	N/A	-23.425	151.925	1331	6638	9589838	2014-2015	1	0	1.5
AU_1415	AP	16	Southern GBR	54	Australia	Queensland	Heron Reef - Canyons (Back reef slope) Site 1	-23.4548	151.924	8	11	2014	6	1	1	N/A	1	1.49	N/A	0	2/2/2015	0	0	0	0.98	0	N/A	In-situ	Reef Check database	N/A	% coral mortality (where given) calculated as % of (total number of recently killed coral colonies/total of hard coral colonies). % coral bleaching and % coral mortality for each observation calculated as mean values across the four segments.	Reef Check Australia,	N/A	AAAA	3	N/A	N/A	N/A	N/A	N/A	-23.475	151.925	1330	6638	9582638	2014-2015	1	0	1
AU_1416	AP	16	Southern GBR	54	Australia	Queensland	Heron Reef - Canyons (Back reef slope) Site 1	-23.4548	151.924	24	11	2015	5	1	1	N/A	-1	N/A	N/A	0	6/1/2015	2	0	0	0	0	295	In-situ	Reef Check database	N/A	% coral mortality (where given) calculated as % of (total number of recently killed coral colonies/total of hard coral colonies). % coral bleaching and % coral mortality for each observation calculated as mean values across the four segments.	Reef Check Australia,	N/A	AA	3	0.98	N/A	N/A	N/A	N/A	-23.475	151.925	1330	6638	9582638	2015-2016	1	0	1
AU_1417	AP	16	Southern GBR	54	Australia	N/A	Heron Reef - Coral Cascade (Back reef slope) Site 1	-23.4337	151.925	9	11	2014	6	1	1.5	N/A	1	2.35	N/A	0	2/2/2015	0	0	0	1	0	N/A	In-situ	Reef Check database	N/A	% coral mortality (where given) calculated as % of (total number of recently killed coral colonies/total of hard coral colonies). % coral bleaching and % coral mortality for each observation calculated as mean values across the four segments.	Reef Check Australia,	N/A	AAAA	3	N/A	N/A	N/A	N/A	N/A	-23.425	151.925	1331	6638	9589838	2014-2015	1	0	1.5
AU_1418	AP	16	Southern GBR	54	Australia	N/A	Heron Reef - Coral Cascade (Back reef slope) Site 1	-23.4337	151.925	25	11	2015	6	1	1	N/A	-1	N/A	N/A	0	6/1/2015	2	0	0	0	0	296	In-situ	Reef Check database	N/A	% coral mortality (where given) calculated as % of (total number of recently killed coral colonies/total of hard coral colonies). % coral bleaching and % coral mortality for each observation calculated as mean values across the four segments.	Reef Check Australia,	N/A	AA	3	1	N/A	N/A	N/A	N/A	-23.425	151.925	1331	6638	9589838	2015-2016	1	0	1
AU_1419	AP	16	Southern GBR	54	Australia	N/A	Heron Reef - Harry's Bommie (Fringing reef seaward) Site 1	-23.4604	151.929	8	11	2014	5	1	0.75	N/A	1	1.38	N/A	0	2/2/2015	0	0	0	0.98	0	N/A	In-situ	Reef Check database	N/A	% coral mortality (where given) calculated as % of (total number of recently killed coral colonies/total of hard coral colonies). % coral bleaching and % coral mortality for each observation calculated as mean values across the four segments.	Reef Check Australia,	N/A	AAAA	3	N/A	N/A	N/A	N/A	N/A	-23.475	151.925	1330	6638	9582638	2014-2015	1	0	0.75
AU_142	AP	16	Southern GBR	54	Australia	Keppel Islands	North Keppel Island (NK3)	-23.0868	150.892	9	4	2016	5	2	19.064	N/A	0	0	N/A	0	2/18/2016	2	0.51	0.51	0.51	0	51	In-situ	Emma Kennedy	N/A	N/A	Emma Kennedy	e.kennedy1@uq.edu.au	AAAA	1	1.38	N/A	N/A	N/A	N/A	-23.075	150.875	1338	6617	9640217	2015-2016	2	0	19.064
AU_1420	AP	16	Southern GBR	54	Australia	N/A	Heron Reef - Harry's Bommie (Fringing reef seaward) Site 1	-23.4604	151.929	24	11	2015	6	1	1	N/A	-1	N/A	N/A	0	6/1/2015	2	0	0	0	0	295	In-situ	Reef Check database	N/A	% coral mortality (where given) calculated as % of (total number of recently killed coral colonies/total of hard coral colonies). % coral bleaching and % coral mortality for each observation calculated as mean values across the four segments.	Reef Check Australia,	N/A	AA	3	0.98	N/A	N/A	N/A	N/A	-23.475	151.925	1330	6638	9582638	2015-2016	1	0	1
AU_1421	AP	16	Southern GBR	54	Australia	N/A	Heron Reef- Libby's Lair (Back reef slope) Site 1	-23.4343	151.933	9	11	2014	6	1	1.5	N/A	1	0.8	N/A	0	2/2/2015	0	0	0	1	0	N/A	In-situ	Reef Check database	N/A	% coral mortality (where given) calculated as % of (total number of recently killed coral colonies/total of hard coral colonies). % coral bleaching and % coral mortality for each observation calculated as mean values across the four segments.	Reef Check Australia,	N/A	AAAA	3	N/A	N/A	N/A	N/A	N/A	-23.425	151.925	1331	6638	9589838	2014-2015	1	0	1.5
AU_1422	AP	16	Southern GBR	54	Australia	N/A	Heron Reef- Libby's Lair (Back reef slope) Site 1	-23.4343	151.933	12	11	2014	6	1	2.5	N/A	-1	N/A	N/A	0	2/2/2015	0	0	0	1	0	N/A	In-situ	Reef Check database	N/A	% coral mortality (where given) calculated as % of (total number of recently killed coral colonies/total of hard coral colonies). % coral bleaching and % coral mortality for each observation calculated as mean values across the four segments.	Reef Check Australia,	N/A	AA	3	N/A	N/A	N/A	N/A	N/A	-23.425	151.925	1331	6638	9589838	2014-2015	1	0	2.5
AU_1423	AP	16	Southern GBR	54	Australia	N/A	Heron Reef- Libby's Lair (Back reef slope) Site 1	-23.4343	151.933	25	11	2015	6	1	1	N/A	-1	N/A	N/A	0	6/1/2015	2	0	0	0	0	296	In-situ	Reef Check database	N/A	% coral mortality (where given) calculated as % of (total number of recently killed coral colonies/total of hard coral colonies). % coral bleaching and % coral mortality for each observation calculated as mean values across the four segments.	Reef Check Australia,	N/A	AA	3	1	N/A	N/A	N/A	N/A	-23.425	151.925	1331	6638	9589838	2015-2016	1	0	1
AU_1424	AP	16	Southern GBR	54	Australia	Queensland	Burkitts Reef - Burkitts Reef (Fringing reef seaward) Site 1	-24.8103	152.471	31	8	2014	7	1	1	N/A	0	0	N/A	0	3/5/2015	0	0	0	2.91	0	N/A	In-situ	Reef Check database	N/A	% coral mortality (where given) calculated as % of (total number of recently killed coral colonies/total of hard coral colonies). % coral bleaching and % coral mortality for each observation calculated as mean values across the four segments.	Reef Check Australia,	N/A	AAAA	3	N/A	N/A	N/A	N/A	N/A	-24.825	152.475	1303	6649	9388249	2014-2015	1	0	1
AU_1425	AP	16	Southern GBR	54	Australia	Queensland	Barolin Rocks Reef - Barolin Rocks (Woongarra Marine Park) (Fringing reef seaward) Site 2	-24.8836	152.491	31	8	2014	6	1	1.75	N/A	0	0	N/A	0	3/5/2015	0	0	0	2.94	0	N/A	In-situ	Reef Check database	N/A	% coral mortality (where given) calculated as % of (total number of recently killed coral colonies/total of hard coral colonies). % coral bleaching and % coral mortality for each observation calculated as mean values across the four segments.	Reef Check Australia,	N/A	AAAA	3	N/A	N/A	N/A	N/A	N/A	-24.875	152.475	1302	6649	9381049	2014-2015	1	0	1.75
AU_1426	AP	16	Southern GBR	54	Australia	Queensland	ESA Park - ESA Park (Fringing reef seaward) Site 1	-25.2444	152.825	30	8	2014	3	1	7.5	N/A	0	0	N/A	0	3/10/2015	0	0	0	3.68	0	N/A	In-situ	Reef Check database	N/A	% coral mortality (where given) calculated as % of (total number of recently killed coral colonies/total of hard coral colonies). % coral bleaching and % coral mortality for each observation calculated as mean values across the four segments.	Reef Check Australia,	N/A	AAAA	3	N/A	N/A	N/A	N/A	N/A	-25.225	152.825	1295	6656	9330656	2014-2015	1	0	7.5
AU_1427	AP	16	Southern GBR	54	Australia	Queensland	Gatackers Reef - Gatackers Reef West (Fringing reef seaward) Site 2	-25.6496	152.915	30	8	2014	3	1	8.75	N/A	0	0	N/A	0	3/11/2015	0	0	0	5.12	0	N/A	In-situ	Reef Check database	N/A	% coral mortality (where given) calculated as % of (total number of recently killed coral colonies/total of hard coral colonies). % coral bleaching and % coral mortality for each observation calculated as mean values across the four segments.	Reef Check Australia,	N/A	AAAA	3	N/A	N/A	N/A	N/A	N/A	-25.625	152.925	1287	6658	9273058	2014-2015	1	0	8.75
AU_1428	AP	16	Southern GBR	54	Australia	Queensland	Big Woody Island - Big Woody Conservation Park Zone (Fringing reef leeward) Site 2	-25.2631	152.938	30	8	2014	3	1	1.25	N/A	0	0	N/A	0	3/11/2015	0	0	0	4.98	0	N/A	In-situ	Reef Check database	N/A	% coral mortality (where given) calculated as % of (total number of recently killed coral colonies/total of hard coral colonies). % coral bleaching and % coral mortality for each observation calculated as mean values across the four segments.	Reef Check Australia,	N/A	AAAA	3	N/A	N/A	N/A	N/A	N/A	-25.275	152.925	1294	6658	9323458	2014-2015	1	0	1.25
AU_1429	AP	16	Moreton Bay, Australia	96	Australia	Queensland	Mudjimba (Old Woman) Island - The Ledge (Mudjimba Island) (Back reef slope) Site 2	-26.615	153.113	5	10	2014	10	1	6.25	N/A	0	0	N/A	0	3/5/2015	0	0	0	0.81	0	N/A	In-situ	Reef Check database	N/A	% coral mortality (where given) calculated as % of (total number of recently killed coral colonies/total of hard coral colonies). % coral bleaching and % coral mortality for each observation calculated as mean values across the four segments.	Reef Check Australia,	N/A	AAAA	3	N/A	N/A	N/A	N/A	N/A	-26.625	153.125	1267	6662	9129062	2014-2015	1	0	6.25
AU_143	AP	16	Southern GBR	54	Australia	Keppel Islands	North Keppel Island (NK1)	-23.0813	150.884	9	4	2016	5	1	3.10559	N/A	0	0	N/A	0	2/18/2016	2	0.51	0.51	0.51	0	51	In-situ	Emma Kennedy	N/A	N/A	Emma Kennedy	e.kennedy1@uq.edu.au	AAAA	1	1.38	N/A	N/A	N/A	N/A	-23.075	150.875	1338	6617	9640217	2015-2016	1	0	3.106
AU_1430	AP	16	Moreton Bay, Australia	96	Australia	Queensland	Mudjimba (Old Woman) Island - The Ledge (Mudjimba Island) (Back reef slope) Site 2	-26.615	153.113	18	10	2015	10	0	0	N/A	0	0	N/A	0	6/1/2015	2	0	0	0	0	227	In-situ	Reef Check database	N/A	% coral mortality (where given) calculated as % of (total number of recently killed coral colonies/total of hard coral colonies). % coral bleaching and % coral mortality for each observation calculated as mean values across the four segments.	Reef Check Australia,	N/A	AAAA	3	0.81	N/A	N/A	N/A	N/A	-26.625	153.125	1267	6662	9129062	2015-2016	0	0	0
AU_1431	AP	16	Moreton Bay, Australia	96	Australia	Queensland	Mudjimba (Old Woman) Island - The Ledge (Mudjimba Island) (Back reef crest) Site 3	-26.615	153.113	22	1	2016	6	1	1	N/A	-1	N/A	N/A	0	6/1/2015	2	0	0	0	0	323	In-situ	Reef Check database	N/A	% coral mortality (where given) calculated as % of (total number of recently killed coral colonies/total of hard coral colonies). % coral bleaching and % coral mortality for each observation calculated as mean values across the four segments.	Reef Check Australia,	N/A	AA	3	0.81	N/A	N/A	N/A	N/A	-26.625	153.125	1267	6662	9129062	2015-2016	1	0	1
AU_1432	AP	16	Moreton Bay, Australia	96	Australia	Queensland	Inner Gneerings - The Caves (Other) Site 2	-26.6352	153.152	7	3	2015	9	2	13.5	N/A	1	1.43	N/A	0	3/5/2015	2	0.66	0.66	0.66	0	2	In-situ	Reef Check database	N/A	% coral mortality (where given) calculated as % of (total number of recently killed coral colonies/total of hard coral colonies). % coral bleaching and % coral mortality for each observation calculated as mean values across the four segments.	Reef Check Australia,	N/A	AAAA	3	N/A	N/A	N/A	N/A	N/A	-26.625	153.175	1267	6663	9129063	2014-2015	2	0	13.5
AU_1433	AP	16	Moreton Bay, Australia	96	Australia	Queensland	Inner Gneerings - The Caves (Other) Site 2	-26.6352	153.152	22	1	2016	9	1	1.25	N/A	-1	N/A	N/A	0	6/1/2015	2	0	0	0	0	323	In-situ	Reef Check database	N/A	% coral mortality (where given) calculated as % of (total number of recently killed coral colonies/total of hard coral colonies). % coral bleaching and % coral mortality for each observation calculated as mean values across the four segments.	Reef Check Australia,	N/A	AA	3	0.66	N/A	N/A	N/A	N/A	-26.625	153.175	1267	6663	9129063	2015-2016	1	0	1.25
AU_1434	AP	16	Moreton Bay, Australia	96	Australia	N/A	Currimundi Reef - Currimundi Reef (Other) Site 3	-26.7517	153.158	11	3	2016	8	1	3.25	N/A	0	0	N/A	0	6/1/2015	2	0	0	0	0	417	In-situ	Reef Check database	N/A	% coral mortality (where given) calculated as % of (total number of recently killed coral colonies/total of hard coral colonies). % coral bleaching and % coral mortality for each observation calculated as mean values across the four segments.	Reef Check Australia,	N/A	AAAA	3	0.58	N/A	N/A	N/A	N/A	-26.775	153.175	1264	6663	9107463	2015-2016	1	0	3.25
AU_1435	AP	16	Moreton Bay, Australia	96	Australia	N/A	Currimundi Reef - Currimundi Reef (Other) Site 4	-26.7517	153.158	11	3	2016	10	1	7.5	N/A	0	0	N/A	0	6/1/2015	2	0	0	0	0	417	In-situ	Reef Check database	N/A	% coral mortality (where given) calculated as % of (total number of recently killed coral colonies/total of hard coral colonies). % coral bleaching and % coral mortality for each observation calculated as mean values across the four segments.	Reef Check Australia,	N/A	AAAA	3	0.58	N/A	N/A	N/A	N/A	-26.775	153.175	1264	6663	9107463	2015-2016	1	0	7.5
AU_1437	AP	16	Moreton Bay, Australia	96	Australia	N/A	Inner Gneerings - The Caves (Other) Site 1	-26.645	153.161	30	11	2014	9	2	12.5	N/A	-1	N/A	N/A	0	3/5/2015	0	0	0	0.66	0	N/A	In-situ	Reef Check database	N/A	% coral mortality (where given) calculated as % of (total number of recently killed coral colonies/total of hard coral colonies). % coral bleaching and % coral mortality for each observation calculated as mean values across the four segments.	Reef Check Australia,	N/A	AA	3	N/A	N/A	N/A	N/A	N/A	-26.625	153.175	1267	6663	9129063	2014-2015	2	0	12.5
AU_1438	AP	16	Moreton Bay, Australia	96	Australia	N/A	Inner Gneerings - The Caves (Other) Site 1	-26.645	153.161	21	11	2015	10	1	6.25	N/A	-1	N/A	N/A	0	6/1/2015	2	0	0	0	0	261	In-situ	Reef Check database	N/A	% coral mortality (where given) calculated as % of (total number of recently killed coral colonies/total of hard coral colonies). % coral bleaching and % coral mortality for each observation calculated as mean values across the four segments.	Reef Check Australia,	N/A	AA	3	0.66	N/A	N/A	N/A	N/A	-26.625	153.175	1267	6663	9129063	2015-2016	1	0	6.25
AU_144	AP	16	Southern GBR	54	Australia	Keppel Islands	Monkey Beach	-23.1958	150.937	9	4	2016	4	2	19.2774	N/A	0	0	N/A	0	2/18/2016	2	0.53	0.53	0.53	0	51	In-situ	Emma Kennedy	N/A	N/A	Emma Kennedy	e.kennedy1@uq.edu.au	AAAA	1	1.38	N/A	N/A	N/A	N/A	-23.175	150.925	1336	6618	9625818	2015-2016	2	0	19.277
AU_1440	AP	16	Moreton Bay, Australia	96	Australia	N/A	Inner Gneerings - The Caves (Other) Site 2	-26.645	153.161	7	3	2015	9	1	1.5	N/A	-1	N/A	N/A	0	3/5/2015	2	0.66	0.66	0.66	0	2	In-situ	Reef Check database	N/A	% coral mortality (where given) calculated as % of (total number of recently killed coral colonies/total of hard coral colonies). % coral bleaching and % coral mortality for each observation calculated as mean values across the four segments.	Reef Check Australia,	N/A	AA	3	N/A	N/A	N/A	N/A	N/A	-26.625	153.175	1267	6663	9129063	2014-2015	1	0	1.5
AU_1441	AP	16	Moreton Bay, Australia	96	Australia	N/A	Inner Gneerings - The Caves (Other) Site 2	-26.645	153.161	18	10	2015	9	0	0	N/A	-1	N/A	N/A	0	6/1/2015	2	0	0	0	0	227	In-situ	Reef Check database	N/A	% coral mortality (where given) calculated as % of (total number of recently killed coral colonies/total of hard coral colonies). % coral bleaching and % coral mortality for each observation calculated as mean values across the four segments.	Reef Check Australia,	N/A	AA	3	0.66	N/A	N/A	N/A	N/A	-26.625	153.175	1267	6663	9129063	2015-2016	0	0	0
AU_1442	AP	16	Moreton Bay, Australia	96	Australia	N/A	Inner Gneerings - The Caves (Other) Site 3	-26.645	153.161	30	11	2014	10	1	6.25	N/A	0	0	N/A	0	3/5/2015	0	0	0	0.66	0	N/A	In-situ	Reef Check database	N/A	% coral mortality (where given) calculated as % of (total number of recently killed coral colonies/total of hard coral colonies). % coral bleaching and % coral mortality for each observation calculated as mean values across the four segments.	Reef Check Australia,	N/A	AAAA	3	N/A	N/A	N/A	N/A	N/A	-26.625	153.175	1267	6663	9129063	2014-2015	1	0	6.25
AU_1443	AP	16	Moreton Bay, Australia	96	Australia	N/A	Myora Reef - Myora Reef (Fringing reef leeward) Site 1	-27.472	153.41	10	1	2015	2	1	6.25	N/A	1	0.89	N/A	0	3/11/2015	0	0.65	0.65	1.9	0	N/A	In-situ	Reef Check database	N/A	% coral mortality (where given) calculated as % of (total number of recently killed coral colonies/total of hard coral colonies). % coral bleaching and % coral mortality for each observation calculated as mean values across the four segments.	Reef Check Australia,	N/A	AAAA	3	N/A	N/A	N/A	N/A	N/A	-27.475	153.425	1250	6668	9006668	2014-2015	1	0	6.25
AU_1444	AP	16	Moreton Bay, Australia	96	Australia	N/A	Myora Reef - Myora Reef (Fringing reef leeward) Site 1	-27.472	153.41	31	10	2015	2	1	6.25	N/A	-1	N/A	N/A	0	2/26/2016	0	0	0	0.33	0	N/A	In-situ	Reef Check database	N/A	% coral mortality (where given) calculated as % of (total number of recently killed coral colonies/total of hard coral colonies). % coral bleaching and % coral mortality for each observation calculated as mean values across the four segments.	Reef Check Australia,	N/A	AA	3	1.9	N/A	N/A	N/A	N/A	-27.475	153.425	1250	6668	9006668	2015-2016	1	0	6.25
AU_1445	AP	16	Moreton Bay, Australia	96	Australia	N/A	Green Island - Green Island East (Fringing reef leeward) Site 1	-27.4191	153.242	18	11	2015	3	2	20	N/A	0	0	N/A	0	2/3/2016	0	0	0	0.45	0	N/A	In-situ	Reef Check database	N/A	% coral mortality (where given) calculated as % of (total number of recently killed coral colonies/total of hard coral colonies). % coral bleaching and % coral mortality for each observation calculated as mean values across the four segments.	Reef Check Australia,	N/A	AAAA	3	3.04	N/A	N/A	N/A	N/A	-27.425	153.225	1251	6664	9013864	2015-2016	2	0	20
AU_1446	AP	16	Moreton Bay, Australia	96	Australia	Queensland	Gold Coast Seaway Reefs - South-West Wall (Fringing reef leeward) Site 1	-27.9397	153.421	19	12	2015	2	0	0	N/A	0	0	N/A	0	6/1/2015	2	0	0	0	0	718	In-situ	Reef Check database	N/A	% coral mortality (where given) calculated as % of (total number of recently killed coral colonies/total of hard coral colonies). % coral bleaching and % coral mortality for each observation calculated as mean values across the four segments.	Reef Check Australia,	N/A	AAAA	3	N/A	N/A	N/A	N/A	N/A	-27.925	153.425	1241	6668	8941868	2015-2016	0	0	0
AU_1447	AP	16	Moreton Bay, Australia	96	Australia	Queensland	Gold Coast Seaway Reefs - South-West Wall (Fringing reef leeward) Site 1	-27.9397	153.421	20	12	2015	3	0	0	N/A	-1	N/A	N/A	0	6/1/2015	2	0	0	0	0	719	In-situ	Reef Check database	N/A	% coral mortality (where given) calculated as % of (total number of recently killed coral colonies/total of hard coral colonies). % coral bleaching and % coral mortality for each observation calculated as mean values across the four segments.	Reef Check Australia,	N/A	AA	3	N/A	N/A	N/A	N/A	N/A	-27.925	153.425	1241	6668	8941868	2015-2016	0	0	0
AU_1448	AP	16	Moreton Bay, Australia	96	Australia	Queensland	Palm Beach Reef - Palm Beach Reef (Fringing reef seaward) Site 1	-28.1092	153.476	22	11	2015	10	1	1	N/A	0	0	N/A	0	2/20/2016	0	0	0	0.15	0	N/A	In-situ	Reef Check database	N/A	% coral mortality (where given) calculated as % of (total number of recently killed coral colonies/total of hard coral colonies). % coral bleaching and % coral mortality for each observation calculated as mean values across the four segments.	Reef Check Australia,	N/A	AAAA	3	N/A	N/A	N/A	N/A	N/A	-28.125	153.475	1237	6669	8913069	2015-2016	1	0	1
AU_1449	AP	16	Moreton Bay, Australia	96	Australia	Queensland	Flinders Reef - Nursery (Back reef slope) Site 1	-26.9775	153.484	4	1	2015	5	1	4.25	N/A	0	0	N/A	0	3/5/2015	0	0	0	0.82	0	N/A	In-situ	Reef Check database	N/A	% coral mortality (where given) calculated as % of (total number of recently killed coral colonies/total of hard coral colonies). % coral bleaching and % coral mortality for each observation calculated as mean values across the four segments.	Reef Check Australia,	N/A	AAAA	3	N/A	N/A	N/A	N/A	N/A	-26.975	153.475	1260	6669	9078669	2014-2015	1	0	4.25
AU_145	AP	16	Northern GBR	53	Australia	Lizard Island	BP1	-14.685	145.467	23	4	2016	2	2	23	N/A	1	10	N/A	0	3/30/2016	2	8.61	7.94	8.61	0	24	In-situ	Laura Richardson	Richardson, L. E., Graham, N. A. J., Pratchett, M. S., Eurich, J. G., and A. S. Hoey. Mass coral bleaching causes biotic homogenization of reef fish assemblages. Global Change Biology, DOI: 10.1111/gcb.14119 (2018).	N/A	Laura Richardson	laura.richardson1@my.jcu.edu.au	AAAA	1	1.69	N/A	N/A	N/A	N/A	-14.675	145.475	1506	6509	10849709	2015-2016	2	0	23
AU_1450	AP	16	Moreton Bay, Australia	96	Australia	Queensland	Flinders Reef - Nursery (Back reef slope) Site 1	-26.9775	153.484	10	1	2016	10	1	0.75	N/A	-1	N/A	N/A	0	3/2/2016	0	0	0	0.45	0	N/A	In-situ	Reef Check database	N/A	% coral mortality (where given) calculated as % of (total number of recently killed coral colonies/total of hard coral colonies). % coral bleaching and % coral mortality for each observation calculated as mean values across the four segments.	Reef Check Australia,	N/A	AA	3	0.82	N/A	N/A	N/A	N/A	-26.975	153.475	1260	6669	9078669	2015-2016	1	0	0.75
AU_1451	AP	16	Moreton Bay, Australia	96	Australia	Queensland	Flat Rock Island - Shark Gulley (Fringing reef seaward) Site 1	-27.3967	153.557	23	11	2014	6	1	3.75	N/A	0	0	N/A	0	3/13/2015	0	0	0	2.08	0	N/A	In-situ	Reef Check database	N/A	% coral mortality (where given) calculated as % of (total number of recently killed coral colonies/total of hard coral colonies). % coral bleaching and % coral mortality for each observation calculated as mean values across the four segments.	Reef Check Australia,	N/A	AAAA	3	N/A	N/A	N/A	N/A	N/A	-27.375	153.575	1252	6671	9021071	2014-2015	1	0	3.75
AU_1452	AP	16	Moreton Bay, Australia	96	Australia	Queensland	Flat Rock Island - Shark Gulley (Fringing reef seaward) Site 1	-27.3967	153.557	13	9	2015	8	1	2.5	N/A	-1	N/A	N/A	0	3/8/2016	0	0	0	1.29	0	N/A	In-situ	Reef Check database	N/A	% coral mortality (where given) calculated as % of (total number of recently killed coral colonies/total of hard coral colonies). % coral bleaching and % coral mortality for each observation calculated as mean values across the four segments.	Reef Check Australia,	N/A	AA	3	2.08	N/A	N/A	N/A	N/A	-27.375	153.575	1252	6671	9021071	2015-2016	1	0	2.5
AU_1453	AP	16	Moreton Bay, Australia	96	Australia	Queensland	Flat Rock Island - Shark Gulley (Fringing reef seaward) Site 1	-27.3967	153.557	5	3	2016	10	1	3.5	N/A	-1	N/A	N/A	0	3/8/2016	0	1.15	1.15	1.29	0	N/A	In-situ	Reef Check database	N/A	% coral mortality (where given) calculated as % of (total number of recently killed coral colonies/total of hard coral colonies). % coral bleaching and % coral mortality for each observation calculated as mean values across the four segments.	Reef Check Australia,	N/A	AA	3	2.08	N/A	N/A	N/A	N/A	-27.375	153.575	1252	6671	9021071	2015-2016	1	0	3.5
AU_1454	AP	16	Moreton Bay, Australia	96	Australia	Queensland	Flat Rock Island - The Nursery (Fringing reef leeward) Site 1	-27.3906	153.551	23	11	2014	7	1	1.25	N/A	0	0	N/A	0	3/13/2015	0	0	0	2.08	0	N/A	In-situ	Reef Check database	N/A	% coral mortality (where given) calculated as % of (total number of recently killed coral colonies/total of hard coral colonies). % coral bleaching and % coral mortality for each observation calculated as mean values across the four segments.	Reef Check Australia,	N/A	AAAA	3	N/A	N/A	N/A	N/A	N/A	-27.375	153.575	1252	6671	9021071	2014-2015	1	0	1.25
AU_1455	AP	16	Moreton Bay, Australia	96	Australia	Queensland	Flat Rock Island - The Nursery (Fringing reef leeward) Site 1	-27.3906	153.551	13	9	2015	8	2	12.5	N/A	-1	N/A	N/A	0	3/8/2016	0	0	0	1.29	0	N/A	In-situ	Reef Check database	N/A	% coral mortality (where given) calculated as % of (total number of recently killed coral colonies/total of hard coral colonies). % coral bleaching and % coral mortality for each observation calculated as mean values across the four segments.	Reef Check Australia,	N/A	AA	3	2.08	N/A	N/A	N/A	N/A	-27.375	153.575	1252	6671	9021071	2015-2016	2	0	12.5
AU_1456	AP	16	Moreton Bay, Australia	96	Australia	Queensland	Flat Rock Island - The Nursery (Fringing reef leeward) Site 1	-27.3906	153.551	5	3	2016	8	1	5	N/A	-1	N/A	N/A	0	3/8/2016	0	1.15	1.15	1.29	0	N/A	In-situ	Reef Check database	N/A	% coral mortality (where given) calculated as % of (total number of recently killed coral colonies/total of hard coral colonies). % coral bleaching and % coral mortality for each observation calculated as mean values across the four segments.	Reef Check Australia,	N/A	AA	3	2.08	N/A	N/A	N/A	N/A	-27.375	153.575	1252	6671	9021071	2015-2016	1	0	5
AU_1457	AP	16	Moreton Bay, Australia	96	Australia	N/A	Peel Island - Peel Island North (Fringing reef seaward) Site 1	-27.4701	153.349	18	11	2015	3	1	7.5	N/A	0	0	N/A	0	6/1/2015	2	0	0	0.3	0	252	In-situ	Reef Check database	N/A	% coral mortality (where given) calculated as % of (total number of recently killed coral colonies/total of hard coral colonies). % coral bleaching and % coral mortality for each observation calculated as mean values across the four segments.	Reef Check Australia,	N/A	AAAA	3	2.62	N/A	N/A	N/A	N/A	-27.475	153.325	1250	6666	9006666	2015-2016	1	0	7.5
AU_1458	AP	16	Moreton Bay, Australia	96	Australia	N/A	Peel Island- South Peel (Fringing reef seaward) Site 1	-27.5022	153.371	1	11	2015	2	2	30	N/A	0	0	N/A	0	2/26/2016	0	0	0	0.3	0	N/A	In-situ	Reef Check database	N/A	% coral mortality (where given) calculated as % of (total number of recently killed coral colonies/total of hard coral colonies). % coral bleaching and % coral mortality for each observation calculated as mean values across the four segments.	Reef Check Australia,	N/A	AAAA	3	1.72	N/A	N/A	N/A	N/A	-27.525	153.375	1249	6667	8999467	2015-2016	2	0	30
AU_1459	AP	16	Moreton Bay, Australia	96	Australia	N/A	Peel Island- South Peel (Fringing reef seaward) Site 1	-27.5022	153.371	1	11	2015	3	2	35	N/A	-1	N/A	N/A	0	2/26/2016	0	0	0	0.3	0	N/A	In-situ	Reef Check database	N/A	% coral mortality (where given) calculated as % of (total number of recently killed coral colonies/total of hard coral colonies). % coral bleaching and % coral mortality for each observation calculated as mean values across the four segments.	Reef Check Australia,	N/A	AA	3	1.72	N/A	N/A	N/A	N/A	-27.525	153.375	1249	6667	8999467	2015-2016	2	0	35
AU_146	AP	16	Northern GBR	53	Australia	Lizard Island	BP2	-14.6884	145.465	18	4	2016	4	2	21	N/A	1	3	N/A	0	3/30/2016	2	8.61	8.61	8.61	0	19	In-situ	Laura Richardson	Richardson, L. E., Graham, N. A. J., Pratchett, M. S., Eurich, J. G., and A. S. Hoey. Mass coral bleaching causes biotic homogenization of reef fish assemblages. Global Change Biology, DOI: 10.1111/gcb.14119 (2018).	N/A	Laura Richardson	laura.richardson1@my.jcu.edu.au	AAAA	1	1.69	N/A	N/A	N/A	N/A	-14.675	145.475	1506	6509	10849709	2015-2016	2	0	21
AU_1460	AP	16	Moreton Bay, Australia	96	Australia	N/A	Peel Island - Peel Island Northeast (Reef flat) Site 1	-27.5	153.375	24	6	2014	1	0	0.25	N/A	1	8.82	N/A	0	3/10/2015	0	0	0	1.93	0	N/A	In-situ	Reef Check database	N/A	% coral mortality (where given) calculated as % of (total number of recently killed coral colonies/total of hard coral colonies). % coral bleaching and % coral mortality for each observation calculated as mean values across the four segments.	Reef Check Australia,	N/A	AAAA	3	N/A	N/A	N/A	N/A	N/A	-27.475	153.375	1250	6667	9006667	2014-2015	1	1	0.25
AU_1461	AP	16	Moreton Bay, Australia	96	Australia	N/A	Peel Island - Peel Island Northeast (Reef flat) Site 1	-27.5	153.375	6	10	2015	1	2	11.25	N/A	-1	N/A	N/A	0	2/26/2016	0	0	0	0.31	0	N/A	In-situ	Reef Check database	N/A	% coral mortality (where given) calculated as % of (total number of recently killed coral colonies/total of hard coral colonies). % coral bleaching and % coral mortality for each observation calculated as mean values across the four segments.	Reef Check Australia,	N/A	AA	3	1.93	N/A	N/A	N/A	N/A	-27.475	153.375	1250	6667	9006667	2015-2016	2	0	11.25
AU_1462	AP	16	Moreton Bay, Australia	96	Australia	N/A	Goat Island - Goat Island West (Reef flat) Site 1	-27.5166	153.383	24	6	2014	1	1	1	N/A	1	8.89	N/A	0	3/11/2015	0	0	0	1.72	0	N/A	In-situ	Reef Check database	N/A	% coral mortality (where given) calculated as % of (total number of recently killed coral colonies/total of hard coral colonies). % coral bleaching and % coral mortality for each observation calculated as mean values across the four segments.	Reef Check Australia,	N/A	AAAA	3	N/A	N/A	N/A	N/A	N/A	-27.525	153.375	1249	6667	8999467	2014-2015	1	0	1
AU_1463	AP	16	Moreton Bay, Australia	96	Australia	N/A	Goat Island - Goat Island West (Reef flat) Site 1	-27.5166	153.383	6	10	2015	1	2	27.5	N/A	-1	N/A	N/A	0	2/26/2016	0	0	0	0.3	0	N/A	In-situ	Reef Check database	N/A	% coral mortality (where given) calculated as % of (total number of recently killed coral colonies/total of hard coral colonies). % coral bleaching and % coral mortality for each observation calculated as mean values across the four segments.	Reef Check Australia,	N/A	AA	3	1.72	N/A	N/A	N/A	N/A	-27.525	153.375	1249	6667	8999467	2015-2016	2	0	27.5
AU_1464	AP	16	Moreton Bay, Australia	96	Australia	N/A	Goat Island - Goat Island (Fringing reef leeward) Site 1	-27.5177	153.385	10	1	2015	2	3	56.25	N/A	1	2.97	N/A	0	3/11/2015	0	0.49	0.49	1.72	0	N/A	In-situ	Reef Check database	N/A	% coral mortality (where given) calculated as % of (total number of recently killed coral colonies/total of hard coral colonies). % coral bleaching and % coral mortality for each observation calculated as mean values across the four segments.	Reef Check Australia,	N/A	AAAA	3	N/A	N/A	N/A	N/A	N/A	-27.525	153.375	1249	6667	8999467	2014-2015	3	0	56.25
AU_1465	AP	16	Moreton Bay, Australia	96	Australia	N/A	Goat Island - Goat Island (Fringing reef leeward) Site 1	-27.5177	153.385	1	11	2015	2.5	1	5.5	N/A	-1	N/A	N/A	0	2/26/2016	0	0	0	0.3	0	N/A	In-situ	Reef Check database	N/A	% coral mortality (where given) calculated as % of (total number of recently killed coral colonies/total of hard coral colonies). % coral bleaching and % coral mortality for each observation calculated as mean values across the four segments.	Reef Check Australia,	N/A	AA	3	1.72	N/A	N/A	N/A	N/A	-27.525	153.375	1249	6667	8999467	2015-2016	1	0	5.5
AU_1466	AP	16	Moreton Bay, Australia	96	Australia	N/A	Goat Island - Goat Island (Fringing reef leeward) Site 1	-27.5177	153.385	1	11	2015	3	1	4.25	N/A	-1	N/A	N/A	0	2/26/2016	0	0	0	0.3	0	N/A	In-situ	Reef Check database	N/A	% coral mortality (where given) calculated as % of (total number of recently killed coral colonies/total of hard coral colonies). % coral bleaching and % coral mortality for each observation calculated as mean values across the four segments.	Reef Check Australia,	N/A	AA	3	1.72	N/A	N/A	N/A	N/A	-27.525	153.375	1249	6667	8999467	2015-2016	1	0	4.25
AU_1467	AP	16	Moreton Bay, Australia	96	Australia	N/A	Goat Island - Goat Island (Fringing reef leeward) Site 1	-27.5177	153.385	14	2	2016	1	0	0.25	N/A	-1	N/A	N/A	0	2/26/2016	0	0	0	0.3	0	N/A	In-situ	Reef Check database	N/A	% coral mortality (where given) calculated as % of (total number of recently killed coral colonies/total of hard coral colonies). % coral bleaching and % coral mortality for each observation calculated as mean values across the four segments.	Reef Check Australia,	N/A	AA	3	1.72	N/A	N/A	N/A	N/A	-27.525	153.375	1249	6667	8999467	2015-2016	1	1	0.25
AU_1468	AP	16	Moreton Bay, Australia	96	Australia	N/A	Myora Reef - Myora Reef (Reef flat) Site 2	-27.472	153.41	23	6	2014	1	0	0	N/A	1	5.06	N/A	0	3/11/2015	0	0	0	1.9	0	N/A	In-situ	Reef Check database	N/A	% coral mortality (where given) calculated as % of (total number of recently killed coral colonies/total of hard coral colonies). % coral bleaching and % coral mortality for each observation calculated as mean values across the four segments.	Reef Check Australia,	N/A	AAAA	3	N/A	N/A	N/A	N/A	N/A	-27.475	153.425	1250	6668	9006668	2014-2015	0	0	0
AU_1469	AP	16	Moreton Bay, Australia	96	Australia	N/A	Myora Reef - Myora Reef (Reef flat) Site 2	-27.472	153.41	7	10	2015	1	0	0	N/A	-1	N/A	N/A	0	2/26/2016	0	0	0	0.33	0	N/A	In-situ	Reef Check database	N/A	% coral mortality (where given) calculated as % of (total number of recently killed coral colonies/total of hard coral colonies). % coral bleaching and % coral mortality for each observation calculated as mean values across the four segments.	Reef Check Australia,	N/A	AA	3	1.9	N/A	N/A	N/A	N/A	-27.475	153.425	1250	6668	9006668	2015-2016	0	0	0
AU_147	AP	16	Northern GBR	53	Australia	Lizard Island	BP3	-14.6854	145.46	18	4	2016	3	2	21	N/A	1	6	N/A	0	3/30/2016	2	8.61	8.61	8.61	0	19	In-situ	Laura Richardson	Richardson, L. E., Graham, N. A. J., Pratchett, M. S., Eurich, J. G., and A. S. Hoey. Mass coral bleaching causes biotic homogenization of reef fish assemblages. Global Change Biology, DOI: 10.1111/gcb.14119 (2018).	N/A	Laura Richardson	laura.richardson1@my.jcu.edu.au	AAAA	1	1.69	N/A	N/A	N/A	N/A	-14.675	145.475	1506	6509	10849709	2015-2016	2	0	21
AU_1470	AP	16	Moreton Bay, Australia	96	Australia	N/A	Gold Coast Seaway Reefs - The Pipe (Back reef slope) Site 1	-27.9369	153.426	20	12	2015	4	0	0	N/A	0	0	N/A	0	6/1/2015	2	0	0	0	0	719	In-situ	Reef Check database	N/A	% coral mortality (where given) calculated as % of (total number of recently killed coral colonies/total of hard coral colonies). % coral bleaching and % coral mortality for each observation calculated as mean values across the four segments.	Reef Check Australia,	N/A	AAAA	3	N/A	N/A	N/A	N/A	N/A	-27.925	153.425	1241	6668	8941868	2015-2016	0	0	0
AU_1471	AP	16	Moreton Bay, Australia	96	Australia	N/A	Amity Point - Amity Point (Back reef slope ) Site 1	-27.4007	153.437	12	3	2016	6	0	0	N/A	0	0	N/A	0	2/26/2016	2	0.33	0.33	0.33	0	15	In-situ	Reef Check database	N/A	% coral mortality (where given) calculated as % of (total number of recently killed coral colonies/total of hard coral colonies). % coral bleaching and % coral mortality for each observation calculated as mean values across the four segments.	Reef Check Australia,	N/A	AAAA	3	1.92	N/A	N/A	N/A	N/A	-27.425	153.425	1251	6668	9013868	2015-2016	0	0	0
AU_1472	AP	16	Moreton Bay, Australia	96	Australia	Queensland	Flinders Reef - Nursery (Back reef slope) Site 2	-26.9777	153.484	11	1	2015	6	1	5	N/A	0	0	N/A	0	3/5/2015	0	0	0	0.82	0	N/A	In-situ	Reef Check database	N/A	% coral mortality (where given) calculated as % of (total number of recently killed coral colonies/total of hard coral colonies). % coral bleaching and % coral mortality for each observation calculated as mean values across the four segments.	Reef Check Australia,	N/A	AAAA	3	N/A	N/A	N/A	N/A	N/A	-26.975	153.475	1260	6669	9078669	2014-2015	1	0	5
AU_1473	AP	16	Moreton Bay, Australia	96	Australia	Queensland	Flinders Reef - Nursery (Back reef slope) Site 2	-26.9777	153.484	13	12	2015	10	2	21.25	N/A	-1	N/A	N/A	0	3/2/2016	0	0	0	0.45	0	N/A	In-situ	Reef Check database	N/A	% coral mortality (where given) calculated as % of (total number of recently killed coral colonies/total of hard coral colonies). % coral bleaching and % coral mortality for each observation calculated as mean values across the four segments.	Reef Check Australia,	N/A	AA	3	0.82	N/A	N/A	N/A	N/A	-26.975	153.475	1260	6669	9078669	2015-2016	2	0	21.25
AU_1474	AP	16	Moreton Bay, Australia	96	Australia	Queensland	Flinders Reef - Aladdin's Cave (Other) Site 1	-26.9799	153.488	4	1	2015	8	1	1	N/A	0	0	N/A	0	3/5/2015	0	0	0	0.82	0	N/A	In-situ	Reef Check database	N/A	% coral mortality (where given) calculated as % of (total number of recently killed coral colonies/total of hard coral colonies). % coral bleaching and % coral mortality for each observation calculated as mean values across the four segments.	Reef Check Australia,	N/A	AAAA	3	N/A	N/A	N/A	N/A	N/A	-26.975	153.475	1260	6669	9078669	2014-2015	1	0	1
AU_1475	AP	16	Moreton Bay, Australia	96	Australia	Queensland	Flinders Reef - Aladdin's Cave (Other) Site 1	-26.9799	153.488	13	12	2015	10	2	35	N/A	-1	N/A	N/A	0	3/2/2016	0	0	0	0.45	0	N/A	In-situ	Reef Check database	N/A	% coral mortality (where given) calculated as % of (total number of recently killed coral colonies/total of hard coral colonies). % coral bleaching and % coral mortality for each observation calculated as mean values across the four segments.	Reef Check Australia,	N/A	AA	3	0.82	N/A	N/A	N/A	N/A	-26.975	153.475	1260	6669	9078669	2015-2016	2	0	35
AU_1476	AP	16	Moreton Bay, Australia	96	Australia	N/A	Flinders Reef - Alden's Cave (Other) Site 3	-26.9799	153.488	10	1	2016	10	1	1	N/A	0	0	N/A	0	3/2/2016	0	0	0	0.45	0	N/A	In-situ	Reef Check database	N/A	% coral mortality (where given) calculated as % of (total number of recently killed coral colonies/total of hard coral colonies). % coral bleaching and % coral mortality for each observation calculated as mean values across the four segments.	Reef Check Australia,	N/A	AAAA	3	0.82	N/A	N/A	N/A	N/A	-26.975	153.475	1260	6669	9078669	2015-2016	1	0	1
AU_1477	AP	16	Moreton Bay, Australia	96	Australia	N/A	Shag Rock Island - Shag Rock East (Fringing reef seaward) Site 1	-27.4143	153.526	22	11	2014	5	1	3.75	N/A	1	1.39	N/A	0	3/14/2015	0	0	0	2.22	0	N/A	In-situ	Reef Check database	N/A	% coral mortality (where given) calculated as % of (total number of recently killed coral colonies/total of hard coral colonies). % coral bleaching and % coral mortality for each observation calculated as mean values across the four segments.	Reef Check Australia,	N/A	AAAA	3	N/A	N/A	N/A	N/A	N/A	-27.425	153.525	1251	6670	9013870	2014-2015	1	0	3.75
AU_1478	AP	16	Moreton Bay, Australia	96	Australia	N/A	Shag Rock Island - Shag Rock East (Fringing reef seaward) Site 1	-27.4143	153.526	12	9	2015	9	1	6	N/A	-1	N/A	N/A	0	3/8/2016	0	0	0	0.84	0	N/A	In-situ	Reef Check database	N/A	% coral mortality (where given) calculated as % of (total number of recently killed coral colonies/total of hard coral colonies). % coral bleaching and % coral mortality for each observation calculated as mean values across the four segments.	Reef Check Australia,	N/A	AA	3	2.22	N/A	N/A	N/A	N/A	-27.425	153.525	1251	6670	9013870	2015-2016	1	0	6
AU_1479	AP	16	Moreton Bay, Australia	96	Australia	N/A	Shag Rock Island - Shag Rock East (Back reef crest) Site 1	-27.4143	153.526	6	3	2016	8	1	6.75	N/A	0	0	N/A	0	3/8/2016	0	0.7	0.7	0.84	0	N/A	In-situ	Reef Check database	N/A	% coral mortality (where given) calculated as % of (total number of recently killed coral colonies/total of hard coral colonies). % coral bleaching and % coral mortality for each observation calculated as mean values across the four segments.	Reef Check Australia,	N/A	AAAA	3	2.22	N/A	N/A	N/A	N/A	-27.425	153.525	1251	6670	9013870	2015-2016	1	0	6.75
AU_148	AP	16	Northern GBR	53	Australia	Lizard Island	DGD1	-14.6475	145.454	19	4	2016	5	1	6	N/A	0	0	N/A	0	3/30/2016	2	9.51	9.36	9.51	0	20	In-situ	Laura Richardson	Richardson, L. E., Graham, N. A. J., Pratchett, M. S., Eurich, J. G., and A. S. Hoey. Mass coral bleaching causes biotic homogenization of reef fish assemblages. Global Change Biology, DOI: 10.1111/gcb.14119 (2018).	N/A	Laura Richardson	laura.richardson1@my.jcu.edu.au	AAAA	1	1.71	N/A	N/A	N/A	N/A	-14.625	145.475	1507	6509	10856909	2015-2016	1	0	6
AU_1480	AP	16	Moreton Bay, Australia	96	Australia	N/A	Shag Rock Island - Shag Rock West (Fringing reef seaward) Site 2	-27.4142	153.526	22	11	2014	5	1	3.75	N/A	1	3.45	N/A	0	3/14/2015	0	0	0	2.22	0	N/A	In-situ	Reef Check database	N/A	% coral mortality (where given) calculated as % of (total number of recently killed coral colonies/total of hard coral colonies). % coral bleaching and % coral mortality for each observation calculated as mean values across the four segments.	Reef Check Australia,	N/A	AAAA	3	N/A	N/A	N/A	N/A	N/A	-27.425	153.525	1251	6670	9013870	2014-2015	1	0	3.75
AU_1481	AP	16	Moreton Bay, Australia	96	Australia	N/A	Shag Rock Island - Shag Rock West (Fringing reef seaward) Site 2	-27.4142	153.526	12	9	2015	5	2	12.5	N/A	-1	N/A	N/A	0	3/8/2016	0	0	0	0.84	0	N/A	In-situ	Reef Check database	N/A	% coral mortality (where given) calculated as % of (total number of recently killed coral colonies/total of hard coral colonies). % coral bleaching and % coral mortality for each observation calculated as mean values across the four segments.	Reef Check Australia,	N/A	AA	3	2.22	N/A	N/A	N/A	N/A	-27.425	153.525	1251	6670	9013870	2015-2016	2	0	12.5
AU_1482	AP	16	Moreton Bay, Australia	96	Australia	N/A	Shag Rock Island - Shag Rock West (Fringing reef seaward) Site 2	-27.4142	153.526	6	3	2016	6	1	2.75	N/A	-1	N/A	N/A	0	3/8/2016	0	0.7	0.7	0.84	0	N/A	In-situ	Reef Check database	N/A	% coral mortality (where given) calculated as % of (total number of recently killed coral colonies/total of hard coral colonies). % coral bleaching and % coral mortality for each observation calculated as mean values across the four segments.	Reef Check Australia,	N/A	AA	3	2.22	N/A	N/A	N/A	N/A	-27.425	153.525	1251	6670	9013870	2015-2016	1	0	2.75
AU_1483	AP	16	Moreton Bay, Australia	96	Australia	Queensland	Mudjimba (Old Woman) Island - The Ledge (Mudjimba Island) (Fringing reef leeward) Site 1	-26.615	153.113	5	10	2014	5	1	8.75	N/A	1	1.06	N/A	0	3/5/2015	0	0	0	0.81	0	N/A	In-situ	Reef Check database	N/A	% coral mortality (where given) calculated as % of (total number of recently killed coral colonies/total of hard coral colonies). % coral bleaching and % coral mortality for each observation calculated as mean values across the four segments.	Reef Check Australia,	N/A	AAAA	3	N/A	N/A	N/A	N/A	N/A	-26.625	153.125	1267	6662	9129062	2014-2015	1	0	8.75
AU_1484	AP	16	Moreton Bay, Australia	96	Australia	Queensland	Mudjimba (Old Woman) Island - The Ledge (Mudjimba Island) (Fringing reef leeward) Site 1	-26.615	153.113	21	11	2015	5	1	0.75	N/A	-1	N/A	N/A	0	6/1/2015	2	0	0	0	0	261	In-situ	Reef Check database	N/A	% coral mortality (where given) calculated as % of (total number of recently killed coral colonies/total of hard coral colonies). % coral bleaching and % coral mortality for each observation calculated as mean values across the four segments.	Reef Check Australia,	N/A	AA	3	0.81	N/A	N/A	N/A	N/A	-26.625	153.125	1267	6662	9129062	2015-2016	1	0	0.75
AU_1486	AP	16	Moreton Bay, Australia	96	Australia	Queensland,	Kings Beach - Kings Beach Reef (Fringing reef seaward) Site 1	-26.8033	153.146	20	6	2014	3	2	25	N/A	0	0	N/A	0	1/20/2015	0	0	0	0.92	0	N/A	In-situ	Reef Check database	N/A	% coral mortality (where given) calculated as % of (total number of recently killed coral colonies/total of hard coral colonies). % coral bleaching and % coral mortality for each observation calculated as mean values across the four segments.	Reef Check Australia,	N/A	AAAA	3	N/A	N/A	N/A	N/A	N/A	-26.825	153.125	1263	6662	9100262	2014-2015	2	0	25
AU_1487	AP	16	Moreton Bay, Australia	96	Australia	Queensland,	Kings Beach - Kings Beach Reef (Fringing reef seaward) Site 1	-26.8033	153.146	19	12	2014	4	1	0.5	N/A	-1	N/A	N/A	0	1/20/2015	0	0	0	0.92	0	N/A	In-situ	Reef Check database	N/A	% coral mortality (where given) calculated as % of (total number of recently killed coral colonies/total of hard coral colonies). % coral bleaching and % coral mortality for each observation calculated as mean values across the four segments.	Reef Check Australia,	N/A	AA	3	N/A	N/A	N/A	N/A	N/A	-26.825	153.125	1263	6662	9100262	2014-2015	1	0	0.5
AU_1488	AP	16	Moreton Bay, Australia	96	Australia	Queensland,	Kings Beach - Kings Beach Reef (Fringing reef seaward) Site 1	-26.8033	153.146	12	12	2015	4	0	0	N/A	-1	N/A	N/A	0	6/1/2015	2	0	0	0	0	326	In-situ	Reef Check database	N/A	% coral mortality (where given) calculated as % of (total number of recently killed coral colonies/total of hard coral colonies). % coral bleaching and % coral mortality for each observation calculated as mean values across the four segments.	Reef Check Australia,	N/A	AA	3	0.92	N/A	N/A	N/A	N/A	-26.825	153.125	1263	6662	9100262	2015-2016	0	0	0
AU_149	AP	16	Northern GBR	53	Australia	Lizard Island	DGD2	-14.6581	145.452	20	4	2016	2	1	7	N/A	1	4	N/A	0	3/30/2016	2	8.61	8.45	8.61	0	21	In-situ	Laura Richardson	Richardson, L. E., Graham, N. A. J., Pratchett, M. S., Eurich, J. G., and A. S. Hoey. Mass coral bleaching causes biotic homogenization of reef fish assemblages. Global Change Biology, DOI: 10.1111/gcb.14119 (2018).	N/A	Laura Richardson	laura.richardson1@my.jcu.edu.au	AAAA	1	1.69	N/A	N/A	N/A	N/A	-14.675	145.475	1506	6509	10849709	2015-2016	1	0	7
AU_1490	AP	16	Moreton Bay, Australia	96	Australia	Queensland,	Currimundi Reef - Currimundi Reef (Back reef slope) Site 1	-26.7514	153.158	21	12	2014	8	1	1	N/A	-1	N/A	N/A	0	1/19/2015	0	0	0	0.58	0	N/A	In-situ	Reef Check database	N/A	% coral mortality (where given) calculated as % of (total number of recently killed coral colonies/total of hard coral colonies). % coral bleaching and % coral mortality for each observation calculated as mean values across the four segments.	Reef Check Australia,	N/A	AA	3	N/A	N/A	N/A	N/A	N/A	-26.775	153.175	1264	6663	9107463	2014-2015	1	0	1
AU_1492	AP	16	Moreton Bay, Australia	96	Australia	Queensland,	Currimundi Reef - Currimundi Reef (Back reef slope) Site 2	-26.7514	153.158	21	12	2014	7	1	1	N/A	1	2.68	N/A	0	1/19/2015	0	0	0	0.58	0	N/A	In-situ	Reef Check database	N/A	% coral mortality (where given) calculated as % of (total number of recently killed coral colonies/total of hard coral colonies). % coral bleaching and % coral mortality for each observation calculated as mean values across the four segments.	Reef Check Australia,	N/A	AAAA	3	N/A	N/A	N/A	N/A	N/A	-26.775	153.175	1264	6663	9107463	2014-2015	1	0	1
AU_1493	AP	16	Southern GBR	54	Australia	Gladstone Area, SE Queensland	Ethel Rocks	-23.9704	151.63	4	5	2016	6	0	0	N/A	-1	N/A	N/A	0	2/3/2016	2	0	0	0.53	0	91	In-situ	Ian Butler	N/A	N/A	Ian Butler	ian.butler@uq.net.au	AA	1	0.53	2.72	N/A	N/A	N/A	-23.975	151.625	1320	6632	9510632	2015-2016	0	0	0
AU_1494	AP	16	Southern GBR	54	Australia	Gladstone Area, SE Queensland	Ethel Rocks	-23.9704	151.63	15	5	2017	6	1	4	N/A	-1	N/A	N/A	0	3/18/2017	2	8.22	2.59	8.22	0	58	In-situ	Ian Butler	N/A	N/A	Ian Butler	ian.butler@uq.net.au	AA	1	0.53	2.72	N/A	N/A	N/A	-23.975	151.625	1320	6632	9510632	2016-2017	1	0	4
AU_1495	AP	16	Southern GBR	54	Australia	Gladstone Area, SE Queensland	Pancake Creek	-24.022	151.74	4	5	2016	4	0	0	N/A	-1	N/A	N/A	0	2/3/2016	2	0	0	0.55	0	91	In-situ	Ian Butler	N/A	N/A	Ian Butler	ian.butler@uq.net.au	AA	1	0.55	2.25	N/A	N/A	N/A	-24.025	151.725	1319	6634	9503434	2015-2016	0	0	0
AU_1496	AP	16	Southern GBR	54	Australia	Gladstone Area, SE Queensland	Pancake Creek	-24.022	151.74	19	3	2017	4	2	13	N/A	-1	N/A	N/A	0	3/18/2017	2	7.42	7.42	7.42	0	1	In-situ	Ian Butler	N/A	N/A	Ian Butler	ian.butler@uq.net.au	AA	1	0.55	2.25	N/A	N/A	N/A	-24.025	151.725	1319	6634	9503434	2016-2017	2	0	13
AU_1497	AP	16	Southern GBR	54	Australia	Bundaberg Area, SE Queensland	Stringers	-24.4778	152.034	3	5	2016	8	0	0	N/A	-1	N/A	N/A	0	2/1/2016	2	0	0	0.14	0	92	In-situ	Ian Butler	N/A	N/A	Ian Butler	ian.butler@uq.net.au	AA	1	0.14	1.36	N/A	N/A	N/A	-24.475	152.025	1310	6640	9438640	2015-2016	0	0	0
AU_1498	AP	16	Southern GBR	54	Australia	Bundaberg Area, SE Queensland	Barolin Rocks	-24.8826	152.49	2	5	2016	7	1	2	N/A	-1	N/A	N/A	0	2/3/2016	2	0.49	0	0.49	0	89	In-situ	Ian Butler	N/A	N/A	Ian Butler	ian.butler@uq.net.au	AA	1	2.94	N/A	N/A	N/A	N/A	-24.875	152.475	1302	6649	9381049	2015-2016	1	0	2
AU_1499	AP	16	Southern GBR	54	Australia	Bundaberg Area, SE Queensland	Barolin Rocks	-24.8826	152.49	17	5	2017	7	1	10	N/A	-1	N/A	N/A	0	3/5/2017	2	7.9	0.3	7.9	0	73	In-situ	Ian Butler	N/A	N/A	Ian Butler	ian.butler@uq.net.au	AA	1	0.49	2.94	N/A	N/A	N/A	-24.875	152.475	1302	6649	9381049	2016-2017	1	0	10
AU_150	AP	16	Northern GBR	53	Australia	Lizard Island	DGD3	-14.6693	145.444	20	4	2016	3	1	8	N/A	0	0	N/A	0	3/30/2016	2	8.63	8.48	8.63	0	21	In-situ	Laura Richardson	Richardson, L. E., Graham, N. A. J., Pratchett, M. S., Eurich, J. G., and A. S. Hoey. Mass coral bleaching causes biotic homogenization of reef fish assemblages. Global Change Biology, DOI: 10.1111/gcb.14119 (2018).	N/A	Laura Richardson	laura.richardson1@my.jcu.edu.au	AAAA	1	1.72	N/A	N/A	N/A	N/A	-14.675	145.425	1506	6508	10849708	2015-2016	1	0	8
AU_1500	AP	16	Southern GBR	54	Australia	Bundaberg Area, SE Queensland	Four Mile	-24.9912	152.554	1	5	2016	10	0	0	N/A	-1	N/A	N/A	0	2/3/2016	2	0.49	0	0.49	0	88	In-situ	Ian Butler	N/A	N/A	Ian Butler	ian.butler@uq.net.au	AA	1	3.11	N/A	N/A	N/A	N/A	-24.975	152.575	1300	6651	9366651	2015-2016	0	0	0
AU_1501	AP	16	Southern GBR	54	Australia	Bundaberg Area, SE Queensland	Four Mile	-24.9912	152.554	17	5	2017	10	2	12	N/A	-1	N/A	N/A	0	3/5/2017	2	8.04	0.3	8.04	0	73	In-situ	Ian Butler	N/A	N/A	Ian Butler	ian.butler@uq.net.au	AA	1	0.49	3.11	N/A	N/A	N/A	-24.975	152.575	1300	6651	9366651	2016-2017	2	0	12
AU_1502	AP	16	Southern GBR	54	Australia	Hervey Bay Area, SE Queensland	Pt. Vernon West	-25.2469	152.799	8	12	2015	4	0	0	N/A	-1	N/A	N/A	0	6/1/2015	2	0	0	0.16	0	273	In-situ	Ian Butler	N/A	N/A	Ian Butler	ian.butler@uq.net.au	AA	1	3.82	N/A	N/A	N/A	N/A	-25.225	152.775	1295	6655	9330655	2015-2016	0	0	0
AU_1503	AP	16	Southern GBR	54	Australia	Hervey Bay Area, SE Queensland	Pt. Vernon West	-25.2469	152.799	2	4	2016	4	1	1	N/A	-1	N/A	N/A	0	6/1/2015	2	0	0	0.16	0	389	In-situ	Ian Butler	N/A	N/A	Ian Butler	ian.butler@uq.net.au	AA	1	3.82	N/A	N/A	N/A	N/A	-25.225	152.775	1295	6655	9330655	2015-2016	1	0	1
AU_1504	AP	16	Southern GBR	54	Australia	Hervey Bay Area, SE Queensland	Pt. Vernon West	-25.2469	152.799	13	5	2017	4	1	6	N/A	-1	N/A	N/A	0	3/18/2017	2	8.52	1.55	8.52	0	56	In-situ	Ian Butler	N/A	N/A	Ian Butler	ian.butler@uq.net.au	AA	1	3.82	N/A	N/A	N/A	N/A	-25.225	152.775	1295	6655	9330655	2016-2017	1	0	6
AU_1505	AP	16	Southern GBR	54	Australia	Hervey Bay Area, SE Queensland	Gatakers Point	-25.2418	152.813	2	4	2016	4	0	0	N/A	-1	N/A	N/A	0	6/1/2015	2	0	0	0.17	0	389	In-situ	Ian Butler	N/A	N/A	Ian Butler	ian.butler@uq.net.au	AA	1	3.68	N/A	N/A	N/A	N/A	-25.225	152.825	1295	6656	9330656	2015-2016	0	0	0
AU_1506	AP	16	Southern GBR	54	Australia	Hervey Bay Area, SE Queensland	Gables	-25.2481	152.83	3	4	2016	4	0	0	N/A	-1	N/A	N/A	0	6/1/2015	2	0	0	0.17	0	390	In-situ	Ian Butler	N/A	N/A	Ian Butler	ian.butler@uq.net.au	AA	1	3.68	N/A	N/A	N/A	N/A	-25.225	152.825	1295	6656	9330656	2015-2016	0	0	0
AU_1507	AP	16	Southern GBR	54	Australia	Hervey Bay Area, SE Queensland	Pialba	-25.2729	152.846	2	4	2016	4	0	0	N/A	-1	N/A	N/A	0	6/1/2015	2	0	0	0.17	0	389	In-situ	Ian Butler	N/A	N/A	Ian Butler	ian.butler@uq.net.au	AA	1	4.37	N/A	N/A	N/A	N/A	-25.275	152.825	1294	6656	9323456	2015-2016	0	0	0
AU_1508	AP	16	Southern GBR	54	Australia	Hervey Bay Area, SE Queensland	Pialba	-25.2729	152.846	13	5	2017	4	1	1	N/A	-1	N/A	N/A	0	3/19/2017	2	9.13	1.8	9.13	0	55	In-situ	Ian Butler	N/A	N/A	Ian Butler	ian.butler@uq.net.au	AA	1	4.37	N/A	N/A	N/A	N/A	-25.275	152.825	1294	6656	9323456	2016-2017	1	0	1
AU_1509	AP	16	Southern GBR	54	Australia	Hervey Bay Area, SE Queensland	Scarness Pier	-25.2804	152.856	2	4	2016	4	0	0	N/A	-1	N/A	N/A	0	6/1/2015	2	0	0	0.18	0	389	In-situ	Ian Butler	N/A	N/A	Ian Butler	ian.butler@uq.net.au	AA	1	4.59	N/A	N/A	N/A	N/A	-25.275	152.875	1294	6657	9323457	2015-2016	0	0	0
AU_151	AP	16	Northern GBR	53	Australia	Lizard Island	Mix1	-14.686	145.442	22	4	2016	4	2	21	N/A	1	3	N/A	0	3/30/2016	2	8.63	8.18	8.63	0	23	In-situ	Laura Richardson	Richardson, L. E., Graham, N. A. J., Pratchett, M. S., Eurich, J. G., and A. S. Hoey. Mass coral bleaching causes biotic homogenization of reef fish assemblages. Global Change Biology, DOI: 10.1111/gcb.14119 (2018).	N/A	Laura Richardson	laura.richardson1@my.jcu.edu.au	AAAA	1	1.72	N/A	N/A	N/A	N/A	-14.675	145.425	1506	6508	10849708	2015-2016	2	0	21
AU_1510	AP	16	Southern GBR	54	Australia	Hervey Bay Area, SE Queensland	Torquay	-25.2806	152.864	3	4	2016	4	0	0	N/A	-1	N/A	N/A	0	6/1/2015	2	0	0	0.18	0	390	In-situ	Ian Butler	N/A	N/A	Ian Butler	ian.butler@uq.net.au	AA	1	4.59	N/A	N/A	N/A	N/A	-25.275	152.875	1294	6657	9323457	2015-2016	0	0	0
AU_1511	AP	16	Southern GBR	54	Australia	Hervey Bay Area, SE Queensland	Round Island	-25.2852	152.924	3	4	2016	4	0	0	N/A	-1	N/A	N/A	0	6/1/2015	2	0	0	0.33	0	389	In-situ	Ian Butler	N/A	N/A	Ian Butler	ian.butler@uq.net.au	AA	1	4.98	N/A	N/A	N/A	N/A	-25.275	152.925	1294	6658	9323458	2015-2016	0	0	0
AU_1512	AP	16	Southern GBR	54	Australia	Hervey Bay Area, SE Queensland	Big Woody East	-25.264	152.936	3	4	2016	4	0	0	N/A	-1	N/A	N/A	0	6/1/2015	2	0	0	0.33	0	389	In-situ	Ian Butler	N/A	N/A	Ian Butler	ian.butler@uq.net.au	AA	1	4.98	N/A	N/A	N/A	N/A	-25.275	152.925	1294	6658	9323458	2015-2016	0	0	0
AU_1513	AP	16	Southern GBR	54	Australia	Hervey Bay Area, SE Queensland	Little Woody (N end)	-25.3149	152.916	4	4	2016	6	0	0	N/A	-1	N/A	N/A	0	6/1/2015	2	0	0	0.36	0	390	In-situ	Ian Butler	N/A	N/A	Ian Butler	ian.butler@uq.net.au	AA	1	6.89	N/A	N/A	N/A	N/A	-25.325	152.925	1293	6658	9316258	2015-2016	0	0	0
AU_1514	AP	16	Northern GBR	53	Australia	Lizard Island	N/A	-14.694	145.461	4	3	2016	5.3	3	79.5	N/A	-1	N/A	N/A	0	3/30/2016	0	5.41	5.41	8.61	0	N/A	In-situ	N/A	Hoogenboom, M. O., G. E. Frank, T. J. Chase, S. Jurriaans, M. Álvarez-Noriega, K. Peterson, K. Critchell, K. L. E. Berry, K. J. Nicolet, B. Ramsby, and A. S. Paley. Environmental Drivers of Variation in Bleaching Severity of Acropora Species during an Extreme Thermal Anomaly. Frontiers in Marine Science, doi: 10.3389/fmars.2017.00376 (2017)	Dates of observations, depth, and % bleached values inferred from information in the "Methods" section and Figure 2C in the paper, and file entitled "Acropora_Bleaching_FULLDATASET_ForGEarth_TDH" in supplementary materials for this paper. Coordinates selected at random from the coordinates for all 596 colonies surveyed as listed in the file entitled "Acropora_Bleaching_FULLDATASET_ForGEarth_TDH" …	N/A	N/A	AA	1	1.69	N/A	N/A	N/A	N/A	-14.675	145.475	1506	6509	10849709	2015-2016	3	0	79.5
AU_1515	AP	16	Northern GBR	53	Australia	Lizard Island	N/A	-14.694	145.461	5	3	2016	5.3	3	80.5	N/A	-1	N/A	N/A	0	3/30/2016	0	5.6	5.6	8.61	0	N/A	In-situ	N/A	Hoogenboom, M. O., G. E. Frank, T. J. Chase, S. Jurriaans, M. Álvarez-Noriega, K. Peterson, K. Critchell, K. L. E. Berry, K. J. Nicolet, B. Ramsby, and A. S. Paley. Environmental Drivers of Variation in Bleaching Severity of Acropora Species during an Extreme Thermal Anomaly. Frontiers in Marine Science, doi: 10.3389/fmars.2017.00376 (2017)	Dates of observations, depth, and % bleached values inferred from information in the "Methods" section and Figure 2C in the paper, and file entitled "Acropora_Bleaching_FULLDATASET_ForGEarth_TDH" in supplementary materials for this paper. Coordinates selected at random from the coordinates for all 596 colonies surveyed as listed in the file entitled "Acropora_Bleaching_FULLDATASET_ForGEarth_TDH" …	N/A	N/A	AA	1	1.69	N/A	N/A	N/A	N/A	-14.675	145.475	1506	6509	10849709	2015-2016	3	0	80.5
AU_1516	AP	16	Northern GBR	53	Australia	Lizard Island	N/A	-14.694	145.461	6	3	2016	5.3	3	82.5	N/A	-1	N/A	N/A	0	3/30/2016	0	5.8	5.8	8.61	0	N/A	In-situ	N/A	Hoogenboom, M. O., G. E. Frank, T. J. Chase, S. Jurriaans, M. Álvarez-Noriega, K. Peterson, K. Critchell, K. L. E. Berry, K. J. Nicolet, B. Ramsby, and A. S. Paley. Environmental Drivers of Variation in Bleaching Severity of Acropora Species during an Extreme Thermal Anomaly. Frontiers in Marine Science, doi: 10.3389/fmars.2017.00376 (2017)	Dates of observations, depth, and % bleached values inferred from information in the "Methods" section and Figure 2C in the paper, and file entitled "Acropora_Bleaching_FULLDATASET_ForGEarth_TDH" in supplementary materials for this paper. Coordinates selected at random from the coordinates for all 596 colonies surveyed as listed in the file entitled "Acropora_Bleaching_FULLDATASET_ForGEarth_TDH" …	N/A	N/A	AA	1	1.69	N/A	N/A	N/A	N/A	-14.675	145.475	1506	6509	10849709	2015-2016	3	0	82.5
AU_1517	AP	16	Northern GBR	53	Australia	Lizard Island	N/A	-14.694	145.461	7	3	2016	5.3	3	84	N/A	-1	N/A	N/A	0	3/30/2016	0	5.98	5.98	8.61	0	N/A	In-situ	N/A	Hoogenboom, M. O., G. E. Frank, T. J. Chase, S. Jurriaans, M. Álvarez-Noriega, K. Peterson, K. Critchell, K. L. E. Berry, K. J. Nicolet, B. Ramsby, and A. S. Paley. Environmental Drivers of Variation in Bleaching Severity of Acropora Species during an Extreme Thermal Anomaly. Frontiers in Marine Science, doi: 10.3389/fmars.2017.00376 (2017)	Dates of observations, depth, and % bleached values inferred from information in the "Methods" section and Figure 2C in the paper, and file entitled "Acropora_Bleaching_FULLDATASET_ForGEarth_TDH" in supplementary materials for this paper. Coordinates selected at random from the coordinates for all 596 colonies surveyed as listed in the file entitled "Acropora_Bleaching_FULLDATASET_ForGEarth_TDH" …	N/A	N/A	AA	1	1.69	N/A	N/A	N/A	N/A	-14.675	145.475	1506	6509	10849709	2015-2016	3	0	84
AU_1518	AP	16	Northern GBR	53	Australia	Lizard Island	N/A	-14.694	145.461	8	3	2016	5.3	3	85	N/A	-1	N/A	N/A	0	3/30/2016	0	6.15	6.15	8.61	0	N/A	In-situ	N/A	Hoogenboom, M. O., G. E. Frank, T. J. Chase, S. Jurriaans, M. Álvarez-Noriega, K. Peterson, K. Critchell, K. L. E. Berry, K. J. Nicolet, B. Ramsby, and A. S. Paley. Environmental Drivers of Variation in Bleaching Severity of Acropora Species during an Extreme Thermal Anomaly. Frontiers in Marine Science, doi: 10.3389/fmars.2017.00376 (2017)	Dates of observations, depth, and % bleached values inferred from information in the "Methods" section and Figure 2C in the paper, and file entitled "Acropora_Bleaching_FULLDATASET_ForGEarth_TDH" in supplementary materials for this paper. Coordinates selected at random from the coordinates for all 596 colonies surveyed as listed in the file entitled "Acropora_Bleaching_FULLDATASET_ForGEarth_TDH" …	N/A	N/A	AA	1	1.69	N/A	N/A	N/A	N/A	-14.675	145.475	1506	6509	10849709	2015-2016	3	0	85
AU_1519	AP	16	Northern GBR	53	Australia	Lizard Island	N/A	-14.694	145.461	9	3	2016	5.3	3	86	N/A	-1	N/A	N/A	0	3/30/2016	0	6.3	6.3	8.61	0	N/A	In-situ	N/A	Hoogenboom, M. O., G. E. Frank, T. J. Chase, S. Jurriaans, M. Álvarez-Noriega, K. Peterson, K. Critchell, K. L. E. Berry, K. J. Nicolet, B. Ramsby, and A. S. Paley. Environmental Drivers of Variation in Bleaching Severity of Acropora Species during an Extreme Thermal Anomaly. Frontiers in Marine Science, doi: 10.3389/fmars.2017.00376 (2017)	Dates of observations, depth, and % bleached values inferred from information in the "Methods" section and Figure 2C in the paper, and file entitled "Acropora_Bleaching_FULLDATASET_ForGEarth_TDH" in supplementary materials for this paper. Coordinates selected at random from the coordinates for all 596 colonies surveyed as listed in the file entitled "Acropora_Bleaching_FULLDATASET_ForGEarth_TDH" …	N/A	N/A	AA	1	1.69	N/A	N/A	N/A	N/A	-14.675	145.475	1506	6509	10849709	2015-2016	3	0	86
AU_152	AP	16	Northern GBR	53	Australia	Lizard Island	Mix2	-14.6965	145.45	21	4	2016	1	2	22	N/A	1	9	N/A	0	3/30/2016	2	8.63	8.33	8.63	0	22	In-situ	Laura Richardson	Richardson, L. E., Graham, N. A. J., Pratchett, M. S., Eurich, J. G., and A. S. Hoey. Mass coral bleaching causes biotic homogenization of reef fish assemblages. Global Change Biology, DOI: 10.1111/gcb.14119 (2018).	N/A	Laura Richardson	laura.richardson1@my.jcu.edu.au	AAAA	1	1.72	N/A	N/A	N/A	N/A	-14.675	145.425	1506	6508	10849708	2015-2016	2	0	22
AU_1520	AP	16	Northern GBR	53	Australia	Lizard Island	N/A	-14.694	145.461	10	3	2016	5.3	3	87.5	N/A	-1	N/A	N/A	0	3/30/2016	0	6.46	6.46	8.61	0	N/A	In-situ	N/A	Hoogenboom, M. O., G. E. Frank, T. J. Chase, S. Jurriaans, M. Álvarez-Noriega, K. Peterson, K. Critchell, K. L. E. Berry, K. J. Nicolet, B. Ramsby, and A. S. Paley. Environmental Drivers of Variation in Bleaching Severity of Acropora Species during an Extreme Thermal Anomaly. Frontiers in Marine Science, doi: 10.3389/fmars.2017.00376 (2017)	Dates of observations, depth, and % bleached values inferred from information in the "Methods" section and Figure 2C in the paper, and file entitled "Acropora_Bleaching_FULLDATASET_ForGEarth_TDH" in supplementary materials for this paper. Coordinates selected at random from the coordinates for all 596 colonies surveyed as listed in the file entitled "Acropora_Bleaching_FULLDATASET_ForGEarth_TDH" …	N/A	N/A	AA	1	1.69	N/A	N/A	N/A	N/A	-14.675	145.475	1506	6509	10849709	2015-2016	3	0	87.5
AU_1521	AP	16	Northern GBR	53	Australia	Lizard Island	N/A	-14.694	145.461	11	3	2016	5.3	3	90	N/A	-1	N/A	N/A	0	3/30/2016	0	6.64	6.64	8.61	0	N/A	In-situ	N/A	Hoogenboom, M. O., G. E. Frank, T. J. Chase, S. Jurriaans, M. Álvarez-Noriega, K. Peterson, K. Critchell, K. L. E. Berry, K. J. Nicolet, B. Ramsby, and A. S. Paley. Environmental Drivers of Variation in Bleaching Severity of Acropora Species during an Extreme Thermal Anomaly. Frontiers in Marine Science, doi: 10.3389/fmars.2017.00376 (2017)	Dates of observations, depth, and % bleached values inferred from information in the "Methods" section and Figure 2C in the paper, and file entitled "Acropora_Bleaching_FULLDATASET_ForGEarth_TDH" in supplementary materials for this paper. Coordinates selected at random from the coordinates for all 596 colonies surveyed as listed in the file entitled "Acropora_Bleaching_FULLDATASET_ForGEarth_TDH" …	N/A	N/A	AA	1	1.69	N/A	N/A	N/A	N/A	-14.675	145.475	1506	6509	10849709	2015-2016	3	0	90
AU_1522	AP	16	Northern GBR	53	Australia	Opal Reef	North Opal	-16.1893	145.898	21	10	2016	12	0	0	N/A	-1	N/A	N/A	0	4/2/2017	0	0	0	9.02	0	N/A	In-situ	N/A	XL Catlin Seaview Survey Global Reef Record, field dataset	N/A	Alberto Rodriguez-Ramirez, Global Change Institute, University of Queensland	alberto.rodriguez@uq.edu.au	AA	1	6.17	1.7	N/A	N/A	N/A	-16.175	145.875	1476	6517	10633717	2016-2017	0	0	0
AU_1523	AP	16	Northern GBR	53	Australia	Opal Reef	North Opal North	-16.1758	145.892	21	10	2016	12	0	0	N/A	-1	N/A	N/A	0	4/2/2017	0	0	0	9.02	0	N/A	In-situ	N/A	XL Catlin Seaview Survey Global Reef Record, field dataset	N/A	Alberto Rodriguez-Ramirez, Global Change Institute, University of Queensland	alberto.rodriguez@uq.edu.au	AA	1	6.17	1.7	N/A	N/A	N/A	-16.175	145.875	1476	6517	10633717	2016-2017	0	0	0
AU_1524	AP	16	Northern GBR	53	Australia	Yonge Reef	Yonge Reef South	-14.6262	145.634	27	10	2016	12	0	0	N/A	-1	N/A	N/A	0	4/2/2017	0	0	0	9.2	0	N/A	In-situ	N/A	XL Catlin Seaview Survey Global Reef Record, field dataset	N/A	Alberto Rodriguez-Ramirez, Global Change Institute, University of Queensland	alberto.rodriguez@uq.edu.au	AA	1	11.36	1.49	N/A	N/A	N/A	-14.625	145.625	1507	6512	10856912	2016-2017	0	0	0
AU_1525	AP	16	Northern GBR	53	Australia	Yonge Reef	Yonge Reef North	-14.5709	145.616	27	10	2016	12	0	0	N/A	-1	N/A	N/A	0	4/2/2017	0	0	0	8.93	0	N/A	In-situ	N/A	XL Catlin Seaview Survey Global Reef Record, field dataset	N/A	Alberto Rodriguez-Ramirez, Global Change Institute, University of Queensland	alberto.rodriguez@uq.edu.au	AA	1	11.49	1.37	N/A	N/A	N/A	-14.575	145.625	1508	6512	10864112	2016-2017	0	0	0
AU_1526	AP	16	Northern GBR	53	Australia	Day Reef	Day Reef East	-14.5069	145.562	28	10	2016	12	0	0	N/A	-1	N/A	N/A	0	4/2/2017	0	0	0	9.04	0	N/A	In-situ	N/A	XL Catlin Seaview Survey Global Reef Record, field dataset	N/A	Alberto Rodriguez-Ramirez, Global Change Institute, University of Queensland	alberto.rodriguez@uq.edu.au	AA	1	11.32	1.55	N/A	N/A	N/A	-14.525	145.575	1509	6511	10871311	2016-2017	0	0	0
AU_1527	AP	16	Northern GBR	53	Australia	Day Reef	Day Reef North East	-14.4826	145.545	28	10	2016	12	0	0	N/A	-1	N/A	N/A	0	4/2/2017	0	0	0	8.89	0	N/A	In-situ	N/A	XL Catlin Seaview Survey Global Reef Record, field dataset	N/A	Alberto Rodriguez-Ramirez, Global Change Institute, University of Queensland	alberto.rodriguez@uq.edu.au	AA	1	10.94	1.57	N/A	N/A	N/A	-14.475	145.525	1510	6510	10878510	2016-2017	0	0	0
AU_1528	AP	16	Northern GBR	53	Australia	Day Reef	Day Reef North	-14.4705	145.53	28	10	2016	12	0	0	N/A	-1	N/A	N/A	0	4/2/2017	0	0	0	8.89	0	N/A	In-situ	N/A	XL Catlin Seaview Survey Global Reef Record, field dataset	N/A	Alberto Rodriguez-Ramirez, Global Change Institute, University of Queensland	alberto.rodriguez@uq.edu.au	AA	1	10.94	1.57	N/A	N/A	N/A	-14.475	145.525	1510	6510	10878510	2016-2017	0	0	0
AU_1529	AP	16	Northern GBR	53	Australia	Yonge Reef	Yonge Reef East	-14.579	145.624	27	10	2016	12	0	0	N/A	-1	N/A	N/A	0	4/2/2017	0	0	0	8.93	0	N/A	In-situ	N/A	XL Catlin Seaview Survey Global Reef Record, field dataset	N/A	Alberto Rodriguez-Ramirez, Global Change Institute, University of Queensland	alberto.rodriguez@uq.edu.au	AA	1	11.49	1.37	N/A	N/A	N/A	-14.575	145.625	1508	6512	10864112	2016-2017	0	0	0
AU_153	AP	16	Northern GBR	53	Australia	Lizard Island	Mix3	-14.6872	145.455	30	4	2016	2	1	10	N/A	2	18	N/A	0	3/30/2016	2	8.61	7.54	8.61	0	31	In-situ	Laura Richardson	Richardson, L. E., Graham, N. A. J., Pratchett, M. S., Eurich, J. G., and A. S. Hoey. Mass coral bleaching causes biotic homogenization of reef fish assemblages. Global Change Biology, DOI: 10.1111/gcb.14119 (2018).	N/A	Laura Richardson	laura.richardson1@my.jcu.edu.au	AAAA	1	1.69	N/A	N/A	N/A	N/A	-14.675	145.475	1506	6509	10849709	2015-2016	1	0	10
AU_1530	AP	16	Northern GBR	53	Australia	Ribbon Reef 10	14152 East	-14.9365	145.684	26	10	2016	12	0	0	N/A	-1	N/A	N/A	0	4/2/2017	0	0	0	9.34	0	N/A	In-situ	N/A	XL Catlin Seaview Survey Global Reef Record, field dataset	N/A	Alberto Rodriguez-Ramirez, Global Change Institute, University of Queensland	alberto.rodriguez@uq.edu.au	AA	1	10.01	1.84	N/A	N/A	N/A	-14.925	145.675	1501	6513	10813713	2016-2017	0	0	0
AU_1531	AP	16	Northern GBR	53	Australia	Ribbon Reef 9	Ribbon Reef 9 North	-14.9648	145.711	26	10	2016	12	0	0	N/A	-1	N/A	N/A	0	4/2/2017	0	0	0	9.57	0	N/A	In-situ	N/A	XL Catlin Seaview Survey Global Reef Record, field dataset	N/A	Alberto Rodriguez-Ramirez, Global Change Institute, University of Queensland	alberto.rodriguez@uq.edu.au	AA	1	10.79	2.56	N/A	N/A	N/A	-14.975	145.725	1500	6514	10806514	2016-2017	0	0	0
AU_1532	AP	16	Northern GBR	53	Australia	Ribbon Reef 10	14153 East	-14.9408	145.695	26	10	2016	12	0	0	N/A	-1	N/A	N/A	0	4/2/2017	0	0	0	9.34	0	N/A	In-situ	N/A	XL Catlin Seaview Survey Global Reef Record, field dataset	N/A	Alberto Rodriguez-Ramirez, Global Change Institute, University of Queensland	alberto.rodriguez@uq.edu.au	AA	1	10.01	1.84	N/A	N/A	N/A	-14.925	145.675	1501	6513	10813713	2016-2017	0	0	0
AU_1533	AP	16	Northern GBR	53	Australia	15041 Reef	15041 East	-15.403	145.766	25	10	2016	12	0	0	N/A	-1	N/A	N/A	0	4/2/2017	0	0	0	7.49	0	N/A	In-situ	N/A	XL Catlin Seaview Survey Global Reef Record, field dataset	N/A	Alberto Rodriguez-Ramirez, Global Change Institute, University of Queensland	alberto.rodriguez@uq.edu.au	AA	1	7.57	2.04	N/A	N/A	N/A	-15.425	145.775	1491	6515	10741715	2016-2017	0	0	0
AU_1534	AP	16	Northern GBR	53	Australia	Opal Reef	Opal south	-16.2458	145.876	20	10	2016	12	0	0	N/A	-1	N/A	N/A	0	4/2/2017	0	0	0	9.45	0	N/A	In-situ	N/A	XL Catlin Seaview Survey Global Reef Record, field dataset	N/A	Alberto Rodriguez-Ramirez, Global Change Institute, University of Queensland	alberto.rodriguez@uq.edu.au	AA	1	5.82	1.42	N/A	N/A	N/A	-16.225	145.875	1475	6517	10626517	2016-2017	0	0	0
AU_1535	AP	16	Northern GBR	53	Australia	Opal Reef	Opal north	-16.2024	145.901	20	10	2016	12	0	0	N/A	-1	N/A	N/A	0	4/2/2017	0	0	0	9.44	0	N/A	In-situ	N/A	XL Catlin Seaview Survey Global Reef Record, field dataset	N/A	Alberto Rodriguez-Ramirez, Global Change Institute, University of Queensland	alberto.rodriguez@uq.edu.au	AA	1	6.81	2.18	N/A	N/A	N/A	-16.225	145.925	1475	6518	10626518	2016-2017	0	0	0
AU_1536	AP	16	Northern GBR	53	Australia	St. Crispin Reef	St. Crispin South	-16.1303	145.807	22	10	2016	12	0	0	N/A	-1	N/A	N/A	0	3/31/2017	0	0	0	8.58	0	N/A	In-situ	N/A	XL Catlin Seaview Survey Global Reef Record, field dataset	N/A	Alberto Rodriguez-Ramirez, Global Change Institute, University of Queensland	alberto.rodriguez@uq.edu.au	AA	1	5.82	1.4	N/A	N/A	N/A	-16.125	145.825	1477	6516	10640916	2016-2017	0	0	0
AU_1537	AP	16	Northern GBR	53	Australia	St. Crispin Reef	St. Crispin East	-16.1172	145.861	22	10	2016	12	0	0	N/A	-1	N/A	N/A	0	4/2/2017	0	0	0	8.35	0	N/A	In-situ	N/A	XL Catlin Seaview Survey Global Reef Record, field dataset	N/A	Alberto Rodriguez-Ramirez, Global Change Institute, University of Queensland	alberto.rodriguez@uq.edu.au	AA	1	6.53	1.57	N/A	N/A	N/A	-16.125	145.875	1477	6517	10640917	2016-2017	0	0	0
AU_1538	AP	16	Northern GBR	53	Australia	St. Crispin Reef	St. Crispin North	-16.0714	145.845	22	10	2016	12	0	0	N/A	-1	N/A	N/A	0	3/31/2017	0	0	0	8.4	0	N/A	In-situ	N/A	XL Catlin Seaview Survey Global Reef Record, field dataset	N/A	Alberto Rodriguez-Ramirez, Global Change Institute, University of Queensland	alberto.rodriguez@uq.edu.au	AA	1	5.97	1.53	N/A	N/A	N/A	-16.075	145.825	1478	6516	10648116	2016-2017	0	0	0
AU_1539	AP	16	Northern GBR	53	Australia	Agincourt Reef 2b	Agincourt 2b South	-16.0297	145.856	23	10	2016	12	0	0	N/A	-1	N/A	N/A	0	3/31/2017	0	0	0	7.96	0	N/A	In-situ	N/A	XL Catlin Seaview Survey Global Reef Record, field dataset	N/A	Alberto Rodriguez-Ramirez, Global Change Institute, University of Queensland	alberto.rodriguez@uq.edu.au	AA	1	7.06	1.59	N/A	N/A	N/A	-16.025	145.875	1479	6517	10655317	2016-2017	0	0	0
AU_154	AP	16	Northern GBR	53	Australia	Lizard Island	Mix4	-14.6829	145.449	30	4	2016	2	1	8	N/A	2	28	N/A	0	3/30/2016	2	8.63	7.57	8.63	0	31	In-situ	Laura Richardson	Richardson, L. E., Graham, N. A. J., Pratchett, M. S., Eurich, J. G., and A. S. Hoey. Mass coral bleaching causes biotic homogenization of reef fish assemblages. Global Change Biology, DOI: 10.1111/gcb.14119 (2018).	N/A	Laura Richardson	laura.richardson1@my.jcu.edu.au	AAAA	1	1.72	N/A	N/A	N/A	N/A	-14.675	145.425	1506	6508	10849708	2015-2016	1	0	8
AU_1540	AP	16	Northern GBR	53	Australia	Agincourt Reef 4	Agincourt 4 East	-15.9546	145.835	24	10	2016	12	0	0	N/A	-1	N/A	N/A	0	3/31/2017	0	0	0	7.86	0	N/A	In-situ	N/A	XL Catlin Seaview Survey Global Reef Record, field dataset	N/A	Alberto Rodriguez-Ramirez, Global Change Institute, University of Queensland	alberto.rodriguez@uq.edu.au	AA	1	6.06	1.13	N/A	N/A	N/A	-15.975	145.825	1480	6516	10662516	2016-2017	0	0	0
AU_1541	AP	16	Northern GBR	53	Australia	Agincourt Reef 4	Agincourt 4 South	-15.9663	145.827	24	10	2016	12	0	0	N/A	-1	N/A	N/A	0	3/31/2017	0	0	0	7.86	0	N/A	In-situ	N/A	XL Catlin Seaview Survey Global Reef Record, field dataset	N/A	Alberto Rodriguez-Ramirez, Global Change Institute, University of Queensland	alberto.rodriguez@uq.edu.au	AA	1	6.06	1.13	N/A	N/A	N/A	-15.975	145.825	1480	6516	10662516	2016-2017	0	0	0
AU_1542	AP	16	Northern GBR	53	Australia	Norman Reef	Norman south	-16.4328	145.987	19	10	2016	12	0	0	N/A	-1	N/A	N/A	0	4/1/2017	0	0	0	10.45	0	N/A	In-situ	N/A	XL Catlin Seaview Survey Global Reef Record, field dataset	N/A	Alberto Rodriguez-Ramirez, Global Change Institute, University of Queensland	alberto.rodriguez@uq.edu.au	AA	1	6.21	1.62	N/A	N/A	N/A	-16.425	145.975	1471	6519	10597719	2016-2017	0	0	0
AU_1543	AP	16	Far Northern GBR	52	Australia	Mantis Reef	Mantis East	-12.2427	143.928	4	11	2016	12	0	0	N/A	-1	N/A	N/A	0	4/2/2017	0	0	0	10.4	0	N/A	In-situ	N/A	XL Catlin Seaview Survey Global Reef Record, field dataset	N/A	Alberto Rodriguez-Ramirez, Global Change Institute, University of Queensland	alberto.rodriguez@uq.edu.au	AA	1	10.66	0.87	N/A	N/A	N/A	-12.225	143.925	1555	6478	11202478	2016-2017	0	0	0
AU_1544	AP	16	Far Northern GBR	52	Australia	Mantis Reef	Mantis North	-12.211	143.949	4	11	2016	12	0	0	N/A	-1	N/A	N/A	0	4/2/2017	0	0	0	10.4	0	N/A	In-situ	N/A	XL Catlin Seaview Survey Global Reef Record, field dataset	N/A	Alberto Rodriguez-Ramirez, Global Change Institute, University of Queensland	alberto.rodriguez@uq.edu.au	AA	1	10.66	0.87	N/A	N/A	N/A	-12.225	143.925	1555	6478	11202478	2016-2017	0	0	0
AU_1545	AP	16	Far Northern GBR	52	Australia	Tijou Reef	Tijou West	-13.0721	143.943	3	11	2016	12	0	0	N/A	-1	N/A	N/A	0	4/2/2017	0	0	0	13.02	0	N/A	In-situ	N/A	XL Catlin Seaview Survey Global Reef Record, field dataset	N/A	Alberto Rodriguez-Ramirez, Global Change Institute, University of Queensland	alberto.rodriguez@uq.edu.au	AA	1	9.95	0.48	N/A	N/A	N/A	-13.075	143.925	1538	6478	11080078	2016-2017	0	0	0
AU_1546	AP	16	Far Northern GBR	52	Australia	Tijou Reef	Tijou East	-13.1205	143.978	3	11	2016	12	0	0	N/A	-1	N/A	N/A	0	4/2/2017	0	0	0	13.61	0	N/A	In-situ	N/A	XL Catlin Seaview Survey Global Reef Record, field dataset	N/A	Alberto Rodriguez-Ramirez, Global Change Institute, University of Queensland	alberto.rodriguez@uq.edu.au	AA	1	11.19	0.8	N/A	N/A	N/A	-13.125	143.975	1537	6479	11072879	2016-2017	0	0	0
AU_1547	AP	16	Far Northern GBR	52	Australia	Tijou Reef	Tijou Northeast	-13.0957	143.978	3	11	2016	12	0	0	N/A	-1	N/A	N/A	0	4/2/2017	0	0	0	13.68	0	N/A	In-situ	N/A	XL Catlin Seaview Survey Global Reef Record, field dataset	N/A	Alberto Rodriguez-Ramirez, Global Change Institute, University of Queensland	alberto.rodriguez@uq.edu.au	AA	1	10.94	0.8	N/A	N/A	N/A	-13.075	143.975	1538	6479	11080079	2016-2017	0	0	0
AU_1548	AP	16	Far Northern GBR	52	Australia	Tijou Reef	Tijou North	-13.0508	143.957	3	11	2016	12	0	0	N/A	-1	N/A	N/A	0	4/2/2017	0	0	0	13.68	0	N/A	In-situ	N/A	XL Catlin Seaview Survey Global Reef Record, field dataset	N/A	Alberto Rodriguez-Ramirez, Global Change Institute, University of Queensland	alberto.rodriguez@uq.edu.au	AA	1	10.94	0.8	N/A	N/A	N/A	-13.075	143.975	1538	6479	11080079	2016-2017	0	0	0
AU_1549	AP	16	Far Northern GBR	52	Australia	Tijou Reef	Tijou South	-13.2578	143.959	2	11	2016	12	0	0	N/A	-1	N/A	N/A	0	4/1/2017	0	0	0	11.9	0	N/A	In-situ	N/A	XL Catlin Seaview Survey Global Reef Record, field dataset	N/A	Alberto Rodriguez-Ramirez, Global Change Institute, University of Queensland	alberto.rodriguez@uq.edu.au	AA	1	10.58	0.5	N/A	N/A	N/A	-13.275	143.975	1534	6479	11051279	2016-2017	0	0	0
AU_155	AP	16	Northern GBR	53	Australia	Lizard Island	MP1	-14.6896	145.467	23	4	2016	3	2	24	N/A	0	0	N/A	0	3/30/2016	2	8.61	7.94	8.61	0	24	In-situ	Laura Richardson	Richardson, L. E., Graham, N. A. J., Pratchett, M. S., Eurich, J. G., and A. S. Hoey. Mass coral bleaching causes biotic homogenization of reef fish assemblages. Global Change Biology, DOI: 10.1111/gcb.14119 (2018).	N/A	Laura Richardson	laura.richardson1@my.jcu.edu.au	AAAA	1	1.69	N/A	N/A	N/A	N/A	-14.675	145.475	1506	6509	10849709	2015-2016	2	0	24
AU_1550	AP	16	Far Northern GBR	52	Australia	13050 Reef	13050 East	-13.298	143.978	2	11	2016	12	0	0	N/A	-1	N/A	N/A	0	4/1/2017	0	0	0	11.9	0	N/A	In-situ	N/A	XL Catlin Seaview Survey Global Reef Record, field dataset	N/A	Alberto Rodriguez-Ramirez, Global Change Institute, University of Queensland	alberto.rodriguez@uq.edu.au	AA	1	10.58	0.5	N/A	N/A	N/A	-13.275	143.975	1534	6479	11051279	2016-2017	0	0	0
AU_1551	AP	16	Far Northern GBR	52	Australia	13074 Reef	13074 East	-13.4617	144.072	1	11	2016	12	0	0	N/A	-1	N/A	N/A	0	4/1/2017	0	0	0	11.39	0	N/A	In-situ	N/A	XL Catlin Seaview Survey Global Reef Record, field dataset	N/A	Alberto Rodriguez-Ramirez, Global Change Institute, University of Queensland	alberto.rodriguez@uq.edu.au	AA	1	9.92	0.67	N/A	N/A	N/A	-13.475	144.075	1530	6481	11022481	2016-2017	0	0	0
AU_1552	AP	16	Far Northern GBR	52	Australia	13116 Reef	13116 North	-13.5052	144.087	1	11	2016	12	0	0	N/A	-1	N/A	N/A	0	4/1/2017	0	0	0	11.38	0	N/A	In-situ	N/A	XL Catlin Seaview Survey Global Reef Record, field dataset	N/A	Alberto Rodriguez-Ramirez, Global Change Institute, University of Queensland	alberto.rodriguez@uq.edu.au	AA	1	9.8	0.68	N/A	N/A	N/A	-13.525	144.075	1529	6481	11015281	2016-2017	0	0	0
AU_1553	AP	16	Far Northern GBR	52	Australia	Wilson Reef	Wilson Reef Southeast	-13.9586	144.426	30	10	2016	12	0	0	N/A	-1	N/A	N/A	0	4/2/2017	0	0	0	10.47	0	N/A	In-situ	N/A	XL Catlin Seaview Survey Global Reef Record, field dataset	N/A	Alberto Rodriguez-Ramirez, Global Change Institute, University of Queensland	alberto.rodriguez@uq.edu.au	AA	1	7.71	0.85	N/A	N/A	N/A	-13.975	144.425	1520	6488	10950488	2016-2017	0	0	0
AU_1554	AP	16	Far Northern GBR	52	Australia	Wilson Reef	Wilson Reef Northwest	-13.9357	144.388	30	10	2016	12	0	0	N/A	-1	N/A	N/A	0	4/2/2017	0	0	0	11	0	N/A	In-situ	N/A	XL Catlin Seaview Survey Global Reef Record, field dataset	N/A	Alberto Rodriguez-Ramirez, Global Change Institute, University of Queensland	alberto.rodriguez@uq.edu.au	AA	1	8.24	0.87	N/A	N/A	N/A	-13.925	144.375	1521	6487	10957687	2016-2017	0	0	0
AU_1555	AP	16	Far Northern GBR	52	Australia	Tydeman Reef	Tyrdeman East	-13.9803	144.542	29	10	2016	12	0	0	N/A	-1	N/A	N/A	0	4/2/2017	0	0	0	10.58	0	N/A	In-situ	N/A	XL Catlin Seaview Survey Global Reef Record, field dataset	N/A	Alberto Rodriguez-Ramirez, Global Change Institute, University of Queensland	alberto.rodriguez@uq.edu.au	AA	1	7.76	1	N/A	N/A	N/A	-13.975	144.525	1520	6490	10950490	2016-2017	0	0	0
AU_1556	AP	16	Far Northern GBR	52	Australia	Tydeman Reef	Tydeman West	-13.9702	144.502	29	10	2016	12	0	0	N/A	-1	N/A	N/A	0	4/2/2017	0	0	0	10.58	0	N/A	In-situ	N/A	XL Catlin Seaview Survey Global Reef Record, field dataset	N/A	Alberto Rodriguez-Ramirez, Global Change Institute, University of Queensland	alberto.rodriguez@uq.edu.au	AA	1	7.76	1	N/A	N/A	N/A	-13.975	144.525	1520	6490	10950490	2016-2017	0	0	0
AU_1557	AP	16	Far Northern GBR	52	Australia	14034 Reef	14034 East	-13.9307	144.66	31	10	2016	12	0	0	N/A	-1	N/A	N/A	0	4/2/2017	0	0	0	12.34	0	N/A	In-situ	N/A	XL Catlin Seaview Survey Global Reef Record, field dataset	N/A	Alberto Rodriguez-Ramirez, Global Change Institute, University of Queensland	alberto.rodriguez@uq.edu.au	AA	1	9.32	1.2	N/A	N/A	N/A	-13.925	144.675	1521	6493	10957693	2016-2017	0	0	0
AU_1558	AP	16	Far Northern GBR	52	Australia	14034 Reef	14034 Northeast	-13.9202	144.629	31	10	2016	12	0	0	N/A	-1	N/A	N/A	0	4/2/2017	0	0	0	11.8	0	N/A	In-situ	N/A	XL Catlin Seaview Survey Global Reef Record, field dataset	N/A	Alberto Rodriguez-Ramirez, Global Change Institute, University of Queensland	alberto.rodriguez@uq.edu.au	AA	1	8.67	1.18	N/A	N/A	N/A	-13.925	144.625	1521	6492	10957692	2016-2017	0	0	0
AU_1559	AP	16	Far Northern GBR	52	Australia	14034 Reef	14034 Northwest	-13.9164	144.603	31	10	2016	12	0	0	N/A	-1	N/A	N/A	0	4/2/2017	0	0	0	11.8	0	N/A	In-situ	N/A	XL Catlin Seaview Survey Global Reef Record, field dataset	N/A	Alberto Rodriguez-Ramirez, Global Change Institute, University of Queensland	alberto.rodriguez@uq.edu.au	AA	1	8.67	1.18	N/A	N/A	N/A	-13.925	144.625	1521	6492	10957692	2016-2017	0	0	0
AU_156	AP	16	Northern GBR	53	Australia	Lizard Island	MP2	-14.6781	145.445	22	4	2016	2	2	24	N/A	0	0	N/A	0	3/30/2016	2	8.63	8.18	8.63	0	23	In-situ	Laura Richardson	Richardson, L. E., Graham, N. A. J., Pratchett, M. S., Eurich, J. G., and A. S. Hoey. Mass coral bleaching causes biotic homogenization of reef fish assemblages. Global Change Biology, DOI: 10.1111/gcb.14119 (2018).	N/A	Laura Richardson	laura.richardson1@my.jcu.edu.au	AAAA	1	1.72	N/A	N/A	N/A	N/A	-14.675	145.425	1506	6508	10849708	2015-2016	2	0	24
AU_1560	AP	16	Northern GBR	53	Australia	Opal Reef	North Opal North	-16.1758	145.892	11	10	2017	12	0	0	N/A	-1	N/A	N/A	0	6/1/2017	2	0	0	3.9	0	192	In-situ	N/A	XL Catlin Seaview Survey Global Reef Record, field dataset	N/A	Alberto Rodriguez-Ramirez, Global Change Institute, University of Queensland	alberto.rodriguez@uq.edu.au	AA	1	9.02	6.17	1.7	N/A	N/A	-16.175	145.875	1476	6517	10633717	2016-2017	0	0	0
AU_1561	AP	16	Northern GBR	53	Australia	Yonge Reef	Yonge Reef South	-14.6262	145.634	15	10	2017	12	0	0	N/A	-1	N/A	N/A	0	6/1/2017	2	0	0	4.12	0	196	In-situ	N/A	XL Catlin Seaview Survey Global Reef Record, field dataset	N/A	Alberto Rodriguez-Ramirez, Global Change Institute, University of Queensland	alberto.rodriguez@uq.edu.au	AA	1	9.2	11.36	1.49	N/A	N/A	-14.625	145.625	1507	6512	10856912	2016-2017	0	0	0
AU_1562	AP	16	Northern GBR	53	Australia	Day Reef	Day Reef East	-14.5069	145.562	16	10	2017	12	0	0	N/A	-1	N/A	N/A	0	6/1/2017	2	0	0	3.77	0	197	In-situ	N/A	XL Catlin Seaview Survey Global Reef Record, field dataset	N/A	Alberto Rodriguez-Ramirez, Global Change Institute, University of Queensland	alberto.rodriguez@uq.edu.au	AA	1	9.04	11.32	1.55	N/A	N/A	-14.525	145.575	1509	6511	10871311	2016-2017	0	0	0
AU_1563	AP	16	Northern GBR	53	Australia	Day Reef	Day Reef North East	-14.4826	145.545	16	10	2017	12	0	0	N/A	-1	N/A	N/A	0	6/1/2017	2	0	0	3.45	0	197	In-situ	N/A	XL Catlin Seaview Survey Global Reef Record, field dataset	N/A	Alberto Rodriguez-Ramirez, Global Change Institute, University of Queensland	alberto.rodriguez@uq.edu.au	AA	1	8.89	10.94	1.57	N/A	N/A	-14.475	145.525	1510	6510	10878510	2016-2017	0	0	0
AU_1564	AP	16	Northern GBR	53	Australia	Yonge Reef	Yonge Reef East	-14.579	145.624	15	10	2017	12	0	0	N/A	-1	N/A	N/A	0	6/1/2017	2	0	0	3.94	0	196	In-situ	N/A	XL Catlin Seaview Survey Global Reef Record, field dataset	N/A	Alberto Rodriguez-Ramirez, Global Change Institute, University of Queensland	alberto.rodriguez@uq.edu.au	AA	1	8.93	11.49	1.37	N/A	N/A	-14.575	145.625	1508	6512	10864112	2016-2017	0	0	0
AU_1565	AP	16	Northern GBR	53	Australia	Ribbon Reef 10	14152 East	-14.9365	145.684	14	10	2017	12	0	0	N/A	-1	N/A	N/A	0	6/1/2017	2	0	0	4.82	0	195	In-situ	N/A	XL Catlin Seaview Survey Global Reef Record, field dataset	N/A	Alberto Rodriguez-Ramirez, Global Change Institute, University of Queensland	alberto.rodriguez@uq.edu.au	AA	1	9.34	10.01	1.84	N/A	N/A	-14.925	145.675	1501	6513	10813713	2016-2017	0	0	0
AU_1566	AP	16	Northern GBR	53	Australia	Ribbon Reef 9	Ribbon Reef 9 North	-14.9648	145.711	14	10	2017	12	0	0	N/A	-1	N/A	N/A	0	6/1/2017	2	0	0	4.89	0	195	In-situ	N/A	XL Catlin Seaview Survey Global Reef Record, field dataset	N/A	Alberto Rodriguez-Ramirez, Global Change Institute, University of Queensland	alberto.rodriguez@uq.edu.au	AA	1	9.57	10.79	2.56	N/A	N/A	-14.975	145.725	1500	6514	10806514	2016-2017	0	0	0
AU_1567	AP	16	Northern GBR	53	Australia	Ribbon Reef 10	14153 East	-14.9408	145.695	14	10	2017	12	0	0	N/A	-1	N/A	N/A	0	6/1/2017	2	0	0	4.82	0	195	In-situ	N/A	XL Catlin Seaview Survey Global Reef Record, field dataset	N/A	Alberto Rodriguez-Ramirez, Global Change Institute, University of Queensland	alberto.rodriguez@uq.edu.au	AA	1	9.34	10.01	1.84	N/A	N/A	-14.925	145.675	1501	6513	10813713	2016-2017	0	0	0
AU_1568	AP	16	Northern GBR	53	Australia	15041 Reef	15041 East	-15.403	145.766	13	10	2017	12	0	0	N/A	-1	N/A	N/A	0	6/1/2017	2	0	0	4.45	0	194	In-situ	N/A	XL Catlin Seaview Survey Global Reef Record, field dataset	N/A	Alberto Rodriguez-Ramirez, Global Change Institute, University of Queensland	alberto.rodriguez@uq.edu.au	AA	1	7.49	7.57	2.04	N/A	N/A	-15.425	145.775	1491	6515	10741715	2016-2017	0	0	0
AU_1569	AP	16	Northern GBR	53	Australia	St. Crispin Reef	St. Crispin North	-16.0714	145.845	12	10	2017	12	0	0	N/A	-1	N/A	N/A	0	6/1/2017	2	0	0	3.88	0	195	In-situ	N/A	XL Catlin Seaview Survey Global Reef Record, field dataset	N/A	Alberto Rodriguez-Ramirez, Global Change Institute, University of Queensland	alberto.rodriguez@uq.edu.au	AA	1	8.4	5.97	1.53	N/A	N/A	-16.075	145.825	1478	6516	10648116	2016-2017	0	0	0
AU_157	AP	16	Northern GBR	53	Australia	Lizard Island	PO1	-14.6846	145.442	23	4	2016	2	2	26	N/A	0	0	N/A	0	3/30/2016	2	8.63	7.97	8.63	0	24	In-situ	Laura Richardson	Richardson, L. E., Graham, N. A. J., Pratchett, M. S., Eurich, J. G., and A. S. Hoey. Mass coral bleaching causes biotic homogenization of reef fish assemblages. Global Change Biology, DOI: 10.1111/gcb.14119 (2018).	N/A	Laura Richardson	laura.richardson1@my.jcu.edu.au	AAAA	1	1.72	N/A	N/A	N/A	N/A	-14.675	145.425	1506	6508	10849708	2015-2016	2	0	26
AU_1570	AP	16	Northern GBR	53	Australia	Norman Reef	Norman south	-16.4328	145.987	10	10	2017	12	0	0	N/A	-1	N/A	N/A	0	6/1/2017	2	0	0	4.3	0	192	In-situ	N/A	XL Catlin Seaview Survey Global Reef Record, field dataset	N/A	Alberto Rodriguez-Ramirez, Global Change Institute, University of Queensland	alberto.rodriguez@uq.edu.au	AA	1	10.45	6.21	1.62	N/A	N/A	-16.425	145.975	1471	6519	10597719	2016-2017	0	0	0
AU_1571	AP	16	Far Northern GBR	52	Australia	Great Detached Reef	Southern flank	-11.8433	144.029	21	10	2017	12	0	0	N/A	-1	N/A	N/A	0	6/1/2017	2	0	0	4.23	0	199	In-situ	N/A	XL Catlin Seaview Survey Global Reef Record, field dataset	N/A	Alberto Rodriguez-Ramirez, Global Change Institute, University of Queensland	alberto.rodriguez@uq.edu.au	AA	1	12.18	12.17	1.42	N/A	N/A	-11.825	144.025	1563	6480	11260080	2016-2017	0	0	0
AU_1572	AP	16	Far Northern GBR	52	Australia	Great Detached Reef	Most eastern point	-11.7471	144.108	21	10	2017	12	0	0	N/A	-1	N/A	N/A	0	6/1/2017	2	0	0	4.94	0	199	In-situ	N/A	XL Catlin Seaview Survey Global Reef Record, field dataset	N/A	Alberto Rodriguez-Ramirez, Global Change Institute, University of Queensland	alberto.rodriguez@uq.edu.au	AA	1	13.8	12.55	1.77	N/A	N/A	-11.725	144.125	1565	6482	11274482	2016-2017	0	0	0
AU_1573	AP	16	Far Northern GBR	52	Australia	Great Detached Reef	Most north western edge	-11.6571	144.008	21	10	2017	12	0	0	N/A	-1	N/A	N/A	0	6/1/2017	2	0	0	3.75	0	205	In-situ	N/A	XL Catlin Seaview Survey Global Reef Record, field dataset	N/A	Alberto Rodriguez-Ramirez, Global Change Institute, University of Queensland	alberto.rodriguez@uq.edu.au	AA	1	10.32	10.78	1.02	N/A	N/A	-11.675	144.025	1566	6480	11281680	2016-2017	0	0	0
AU_1574	AP	16	Far Northern GBR	52	Australia	Saunders Reef	Most eastern wall	-11.5121	144.096	22	10	2017	12	0	0	N/A	-1	N/A	N/A	0	6/1/2017	2	0	0	3.59	0	207	In-situ	N/A	XL Catlin Seaview Survey Global Reef Record, field dataset	N/A	Alberto Rodriguez-Ramirez, Global Change Institute, University of Queensland	alberto.rodriguez@uq.edu.au	AA	1	9.73	10.52	1.03	N/A	N/A	-11.525	144.075	1569	6481	11303281	2016-2017	0	0	0
AU_1575	AP	16	Far Northern GBR	52	Australia	Saunders Reef	Southern wall	-11.5013	144.033	22	10	2017	12	0	0	N/A	-1	N/A	N/A	0	6/1/2017	2	0	0	3.21	0	207	In-situ	N/A	XL Catlin Seaview Survey Global Reef Record, field dataset	N/A	Alberto Rodriguez-Ramirez, Global Change Institute, University of Queensland	alberto.rodriguez@uq.edu.au	AA	1	8.24	9.83	0.68	N/A	N/A	-11.525	144.025	1569	6480	11303280	2016-2017	0	0	0
AU_1576	AP	16	Far Northern GBR	52	Australia	Tijou Reef	Tijou East	-13.1205	143.978	19	10	2017	12	0	0	N/A	-1	N/A	N/A	0	6/1/2017	2	0	0	4.74	0	200	In-situ	N/A	XL Catlin Seaview Survey Global Reef Record, field dataset	N/A	Alberto Rodriguez-Ramirez, Global Change Institute, University of Queensland	alberto.rodriguez@uq.edu.au	AA	1	13.61	11.19	0.8	N/A	N/A	-13.125	143.975	1537	6479	11072879	2016-2017	0	0	0
AU_1577	AP	16	Far Northern GBR	52	Australia	Tijou Reef	Tijou Northeast	-13.0957	143.978	19	10	2017	12	0	0	N/A	-1	N/A	N/A	0	6/1/2017	2	0	0	4.77	0	200	In-situ	N/A	XL Catlin Seaview Survey Global Reef Record, field dataset	N/A	Alberto Rodriguez-Ramirez, Global Change Institute, University of Queensland	alberto.rodriguez@uq.edu.au	AA	1	13.68	10.94	0.8	N/A	N/A	-13.075	143.975	1538	6479	11080079	2016-2017	0	0	0
AU_1578	AP	16	Far Northern GBR	52	Australia	Tijou Reef	Tijou North	-13.0508	143.957	19	10	2017	12	0	0	N/A	-1	N/A	N/A	0	6/1/2017	2	0	0	4.77	0	200	In-situ	N/A	XL Catlin Seaview Survey Global Reef Record, field dataset	N/A	Alberto Rodriguez-Ramirez, Global Change Institute, University of Queensland	alberto.rodriguez@uq.edu.au	AA	1	13.68	10.94	0.8	N/A	N/A	-13.075	143.975	1538	6479	11080079	2016-2017	0	0	0
AU_1579	AP	16	Far Northern GBR	52	Australia	Wilson Reef	Wilson Reef East	-13.9344	144.405	18	10	2017	12	0	0	N/A	-1	N/A	N/A	0	6/1/2017	2	0	0	3.17	0	199	In-situ	N/A	XL Catlin Seaview Survey Global Reef Record, field dataset	N/A	Alberto Rodriguez-Ramirez, Global Change Institute, University of Queensland	alberto.rodriguez@uq.edu.au	AA	1	10.98	8.22	0.87	N/A	N/A	-13.925	144.425	1521	6488	10957688	2016-2017	0	0	0
AU_158	AP	16	Northern GBR	53	Australia	Lizard Island	SC1	-14.6833	145.445	17	4	2016	2	2	23	N/A	2	15	N/A	0	3/30/2016	2	8.63	8.63	8.63	0	18	In-situ	Laura Richardson	Richardson, L. E., Graham, N. A. J., Pratchett, M. S., Eurich, J. G., and A. S. Hoey. Mass coral bleaching causes biotic homogenization of reef fish assemblages. Global Change Biology, DOI: 10.1111/gcb.14119 (2018).	N/A	Laura Richardson	laura.richardson1@my.jcu.edu.au	AAAA	1	1.72	N/A	N/A	N/A	N/A	-14.675	145.425	1506	6508	10849708	2015-2016	2	0	23
AU_1580	AP	16	Far Northern GBR	52	Australia	14034 Reef	14034 Northeast	-13.9202	144.629	17	10	2017	12	0	0	N/A	-1	N/A	N/A	0	6/1/2017	2	0	0	3.81	0	198	In-situ	N/A	XL Catlin Seaview Survey Global Reef Record, field dataset	N/A	Alberto Rodriguez-Ramirez, Global Change Institute, University of Queensland	alberto.rodriguez@uq.edu.au	AA	1	11.8	8.67	1.18	N/A	N/A	-13.925	144.625	1521	6492	10957692	2016-2017	0	0	0
AU_1581	AP	16	Far Northern GBR	52	Australia	14034 Reef	14034 Northwest	-13.9164	144.603	17	10	2017	12	0	0	N/A	-1	N/A	N/A	0	6/1/2017	2	0	0	3.81	0	198	In-situ	N/A	XL Catlin Seaview Survey Global Reef Record, field dataset	N/A	Alberto Rodriguez-Ramirez, Global Change Institute, University of Queensland	alberto.rodriguez@uq.edu.au	AA	1	11.8	8.67	1.18	N/A	N/A	-13.925	144.625	1521	6492	10957692	2016-2017	0	0	0
AU_1582	AP	16	Northern GBR	53	Australia	Mission Beach	Beaver Reef	-17.8469	146.498	21	2	2017	5	3	71	N/A	1	5	N/A	0	3/29/2017	0	4.46	4.46	8.31	0	N/A	In-situ	Willis, B.	In prep with submission in October	N/A	Ole Brodnicke	ole.brodnicke@my.jcu.edu.au	AAAA	1	1.95	2.05	N/A	N/A	N/A	-17.825	146.475	1443	6529	10396129	2016-2017	3	0	71
AU_1583	AP	16	Northern GBR	53	Australia	Mission Beach	Beaver Reef	-17.8469	146.498	27	4	2017	5	3	55	N/A	3	39	N/A	0	3/29/2017	2	8.31	5.27	8.31	0	29	In-situ	Pears, P.	In prep with submission in October	N/A	Ole Brodnicke	ole.brodnicke@my.jcu.edu.au	AAAA	1	1.95	2.05	N/A	N/A	N/A	-17.825	146.475	1443	6529	10396129	2016-2017	3	0	55
AU_1584	AP	16	Northern GBR	53	Australia	Mission Beach	Beaver Reef	-17.8469	146.498	24	10	2017	5	0	0	N/A	0	0	N/A	0	6/1/2017	2	0	0	2.76	0	209	In-situ	Willis, B.	In prep with submission in October	N/A	Ole Brodnicke	ole.brodnicke@my.jcu.edu.au	AAAA	1	8.31	1.95	2.05	N/A	N/A	-17.825	146.475	1443	6529	10396129	2016-2017	0	0	0
AU_1586	AP	19	Ningaloo	100	Australia	Ningaloo Marine Park	N/A	-22.652	113.628	10	4	2015	N/A	0	0	N/A	0	0	N/A	0	6/1/2014	2	1.17	0.86	1.17	0	29	Aerial survey	Dr. Peter Barnes, Marine Program Coordinator, Ningaloo Marine Park	N/A	From 2014-2017, during our routine vessel patrols across the marine park, there were only very very occasional observations of very minor and isolated bleaching. Similarly, during the same period there were only very occasional reports of very minor and isolated bleaching from the tourism industry and these were unverified. No widespread bleaching was observed or reported from 2014-2017. Aerial s…	Dr. Peter Barnes, Marine Program Coordinator, Ningaloo Marine Park	peter.barnes@dbca.wa.gov.au	AAAA	1	0.86	N/A	N/A	N/A	N/A	-22.675	113.625	1346	5872	9697072	2014-2015	0	0	0
AU_1587	AP	19	Ningaloo	100	Australia	Ningaloo Marine Park	N/A	-22.652	113.628	15	4	2016	N/A	0	0	N/A	0	0	N/A	0	6/1/2015	2	0	0	0.51	0	400	Aerial survey	Dr. Peter Barnes, Marine Program Coordinator, Ningaloo Marine Park	N/A	From 2014-2017, during our routine vessel patrols across the marine park, there were only very very occasional observations of very minor and isolated bleaching. Similarly, during the same period there were only very occasional reports of very minor and isolated bleaching from the tourism industry and these were unverified. No widespread bleaching was observed or reported from 2014-2017. Aerial s…	Dr. Peter Barnes, Marine Program Coordinator, Ningaloo Marine Park	peter.barnes@dbca.wa.gov.au	AAAA	1	0.86	N/A	N/A	N/A	N/A	-22.675	113.625	1346	5872	9697072	2015-2016	0	0	0
AU_1588	AP	19	Ningaloo	100	Australia	Ningaloo Marine Park	N/A	-22.652	113.628	14	4	2017	N/A	0	0	N/A	0	0	N/A	0	4/14/2017	1	3.32	3.32	3.32	0	N/A	Aerial survey	Dr. Peter Barnes, Marine Program Coordinator, Ningaloo Marine Park	N/A	From 2014-2017, during our routine vessel patrols across the marine park, there were only very very occasional observations of very minor and isolated bleaching. Similarly, during the same period there were only very occasional reports of very minor and isolated bleaching from the tourism industry and these were unverified. No widespread bleaching was observed or reported from 2014-2017. Aerial s…	Dr. Peter Barnes, Marine Program Coordinator, Ningaloo Marine Park	peter.barnes@dbca.wa.gov.au	AAAA	1	0.86	N/A	N/A	N/A	N/A	-22.675	113.625	1346	5872	9697072	2016-2017	0	0	0
AU_1589	AP	16	Southern GBR	54	Australia	Heron Island Reef	Shark Bay reef flat	-23.4445	151.92	29	1	2016	1.9	0	0	N/A	-1	N/A	N/A	0	6/1/2015	2	0	0	0	0	361	In-situ	Denise I. Perez	Perez, D. I., Phinn, S. R., Roelfsema, C. M., Shaw, E., Johnston, L., & Iguel, J. (2018). Primary production and calcification rates of algae‐dominated reef flat and seagrass communities. Journal of Geophysical Research: Biogeosciences, 123. https://doi.org/10.1029/2017JG004241	Photoquadrats were collected every other meter along a 300 m transect from North to South in Shark Bay via snorkel.	Denise I. Perez	dperez@dcrm.gov.mp	AA	1	1	N/A	N/A	N/A	N/A	-23.425	151.925	1331	6638	9589838	2015-2016	0	0	0
AU_159	AP	16	Northern GBR	53	Australia	Lizard Island	SC2	-14.68	145.445	22	4	2016	1	2	23	N/A	2	23	N/A	0	3/30/2016	2	8.63	8.18	8.63	0	23	In-situ	Laura Richardson	Richardson, L. E., Graham, N. A. J., Pratchett, M. S., Eurich, J. G., and A. S. Hoey. Mass coral bleaching causes biotic homogenization of reef fish assemblages. Global Change Biology, DOI: 10.1111/gcb.14119 (2018).	N/A	Laura Richardson	laura.richardson1@my.jcu.edu.au	AAAA	1	1.72	N/A	N/A	N/A	N/A	-14.675	145.425	1506	6508	10849708	2015-2016	2	0	23
AU_160	AP	16	Northern GBR	53	Australia	Lizard Island	SC3	-14.6712	145.442	16	4	2016	2	2	35	N/A	2	21	N/A	0	3/30/2016	2	8.63	8.63	8.63	0	17	In-situ	Laura Richardson	Richardson, L. E., Graham, N. A. J., Pratchett, M. S., Eurich, J. G., and A. S. Hoey. Mass coral bleaching causes biotic homogenization of reef fish assemblages. Global Change Biology, DOI: 10.1111/gcb.14119 (2018).	N/A	Laura Richardson	laura.richardson1@my.jcu.edu.au	AAAA	1	1.72	N/A	N/A	N/A	N/A	-14.675	145.425	1506	6508	10849708	2015-2016	2	0	35
AU_161	AP	16	Northern GBR	53	Australia	Lizard Island	BP1	-14.685	145.467	5	9	2015	2	0	0	N/A	0	0	N/A	0	3/30/2016	0	0	0	8.61	0	N/A	In-situ	Laura Richardson	Richardson, L. E., Graham, N. A. J., Pratchett, M. S., Eurich, J. G., and A. S. Hoey. Mass coral bleaching causes biotic homogenization of reef fish assemblages. Global Change Biology, DOI: 10.1111/gcb.14119 (2018).	N/A	Laura Richardson	laura.richardson1@my.jcu.edu.au	AAAA	1	1.69	N/A	N/A	N/A	N/A	-14.675	145.475	1506	6509	10849709	2015-2016	0	0	0
AU_162	AP	16	Northern GBR	53	Australia	Lizard Island	BP2	-14.6884	145.465	6	9	2015	4	0	0	N/A	0	0	N/A	0	3/30/2016	0	0	0	8.61	0	N/A	In-situ	Laura Richardson	Richardson, L. E., Graham, N. A. J., Pratchett, M. S., Eurich, J. G., and A. S. Hoey. Mass coral bleaching causes biotic homogenization of reef fish assemblages. Global Change Biology, DOI: 10.1111/gcb.14119 (2018).	N/A	Laura Richardson	laura.richardson1@my.jcu.edu.au	AAAA	1	1.69	N/A	N/A	N/A	N/A	-14.675	145.475	1506	6509	10849709	2015-2016	0	0	0
AU_163	AP	16	Northern GBR	53	Australia	Lizard Island	BP3	-14.6854	145.46	11	9	2015	3	0	0	N/A	0	0	N/A	0	3/30/2016	0	0	0	8.61	0	N/A	In-situ	Laura Richardson	Richardson, L. E., Graham, N. A. J., Pratchett, M. S., Eurich, J. G., and A. S. Hoey. Mass coral bleaching causes biotic homogenization of reef fish assemblages. Global Change Biology, DOI: 10.1111/gcb.14119 (2018).	N/A	Laura Richardson	laura.richardson1@my.jcu.edu.au	AAAA	1	1.69	N/A	N/A	N/A	N/A	-14.675	145.475	1506	6509	10849709	2015-2016	0	0	0
AU_164	AP	16	Northern GBR	53	Australia	Lizard Island	DGD1	-14.6475	145.454	14	9	2015	5	0	0	N/A	0	0	N/A	0	3/30/2016	0	0	0	9.51	0	N/A	In-situ	Laura Richardson	Richardson, L. E., Graham, N. A. J., Pratchett, M. S., Eurich, J. G., and A. S. Hoey. Mass coral bleaching causes biotic homogenization of reef fish assemblages. Global Change Biology, DOI: 10.1111/gcb.14119 (2018).	N/A	Laura Richardson	laura.richardson1@my.jcu.edu.au	AAAA	1	1.71	N/A	N/A	N/A	N/A	-14.625	145.475	1507	6509	10856909	2015-2016	0	0	0
AU_1648	AP	16	Moreton Bay, Australia	96	Australia	NSW	Black_Rock	-30.925	153.125	23	5	2016	10	3	55.6	N/A	1	8.4	N/A	0	3/12/2016	2	5.3	0.78	5.3	0	72	In-situ	Steven Dalton, Stephan Smith, Nicola Fraser, Bob Edgar, Ian Shaw	N/A	Percent mortality determined from coral counts recorded on observation data	Steven Dalton	sjdalts@gmail.com	AAAA	1	6.89	N/A	N/A	N/A	N/A	-30.925	153.125	1181	6662	8509862	2015-2016	3	0	55.6
AU_1649	AP	16	Moreton Bay, Australia	96	Australia	NSW	Cook_Island	-28.1963	153.576	30	5	2016	10	2	38.1	N/A	0	0	N/A	0	2/20/2016	2	0	0	0.63	0	100	In-situ	John Pandolfi, Maria Gomez-Cabrera, Brigitte Sommer, Sun Kim, Carrie Sims, Maria Beger, Eugenia Sampayo, Nicole Marie Kyriacou	N/A	Percent mortality determined from coral counts recorded on observation data	Brigitte Sommer	brigitte.sommer@uts.edu.au	AAAA	1	0.63	N/A	N/A	N/A	N/A	-28.175	153.575	1236	6671	8905871	2015-2016	2	0	38.1
AU_165	AP	16	Northern GBR	53	Australia	Lizard Island	DGD2	-14.6581	145.452	14	9	2015	2	0	0	N/A	0	0	N/A	0	3/30/2016	0	0	0	8.61	0	N/A	In-situ	Laura Richardson	Richardson, L. E., Graham, N. A. J., Pratchett, M. S., Eurich, J. G., and A. S. Hoey. Mass coral bleaching causes biotic homogenization of reef fish assemblages. Global Change Biology, DOI: 10.1111/gcb.14119 (2018).	N/A	Laura Richardson	laura.richardson1@my.jcu.edu.au	AAAA	1	1.69	N/A	N/A	N/A	N/A	-14.675	145.475	1506	6509	10849709	2015-2016	0	0	0
AU_1650	AP	16	Moreton Bay, Australia	96	Australia	NSW	Julian_Rocks	-28.6109	153.628	31	5	2016	10	2	48.3	N/A	0	0	N/A	0	2/22/2016	2	0	0	0.88	0	99	In-situ	John Pandolfi, Maria Gomez-Cabrera, Brigitte Sommer, Sun Kim, Carrie Sims, Maria Beger, Eugenia Sampayo, Nicole Marie Kyriacou	N/A	Percent mortality determined from coral counts recorded on observation data	Brigitte Sommer	brigitte.sommer@uts.edu.au	AAAA	1	0.88	0.14	N/A	N/A	N/A	-28.625	153.625	1227	6672	8841072	2015-2016	2	0	48.3
AU_1651	AP	16	Moreton Bay, Australia	96	Australia	QLD	Flinders_Reef	-26.9777	153.484	29	4	2016	9	3	56	N/A	1	1.7	N/A	0	3/2/2016	2	0.45	0.45	0.45	0	58	In-situ	John Pandolfi, Maria Gomez-Cabrera, Brigitte Sommer, Sun Kim, Carrie Sims, Maria Beger, Eugenia Sampayo, Nicole Marie Kyriacou	N/A	Percent mortality determined from coral counts recorded on observation data	Brigitte Sommer	brigitte.sommer@uts.edu.au	AAAA	1	0.82	N/A	N/A	N/A	N/A	-26.975	153.475	1260	6669	9078669	2015-2016	3	0	56
AU_1652	AP	16	Moreton Bay, Australia	96	Australia	QLD	Goat_Island	-27.5156	153.383	28	4	2016	3	1	6.7	N/A	0	0	N/A	0	2/26/2016	2	0.3	0.3	0.3	0	62	In-situ	John Pandolfi, Maria Gomez-Cabrera, Brigitte Sommer, Sun Kim, Carrie Sims, Maria Beger, Eugenia Sampayo, Nicole Marie Kyriacou	N/A	Percent mortality determined from coral counts recorded on observation data	Brigitte Sommer	brigitte.sommer@uts.edu.au	AAAA	1	1.72	N/A	N/A	N/A	N/A	-27.525	153.375	1249	6667	8999467	2015-2016	1	0	6.7
AU_1653	AP	16	Moreton Bay, Australia	96	Australia	QLD	Myora_Reef	-27.475	153.375	28	4	2016	3	1	7.1	N/A	0	0	N/A	0	2/26/2016	2	0.31	0.31	0.31	0	62	In-situ	John Pandolfi, Maria Gomez-Cabrera, Brigitte Sommer, Sun Kim, Carrie Sims, Maria Beger, Eugenia Sampayo, Nicole Marie Kyriacou	N/A	Percent mortality determined from coral counts recorded on observation data	Brigitte Sommer	brigitte.sommer@uts.edu.au	AAAA	1	1.93	N/A	N/A	N/A	N/A	-27.475	153.375	1250	6667	9006667	2015-2016	1	0	7.1
AU_1654	AP	16	Moreton Bay, Australia	96	Australia	QLD	Peel_Island	-27.4952	153.333	28	4	2016	3	2	16.4	N/A	0	0	N/A	0	6/1/2015	2	0.3	0.15	0.3	0	68	In-situ	John Pandolfi, Maria Gomez-Cabrera, Brigitte Sommer, Sun Kim, Carrie Sims, Maria Beger, Eugenia Sampayo, Nicole Marie Kyriacou	N/A	Percent mortality determined from coral counts recorded on observation data	Brigitte Sommer	brigitte.sommer@uts.edu.au	AAAA	1	0.29	2.62	N/A	N/A	N/A	-27.475	153.325	1250	6666	9006666	2015-2016	2	0	16.4
AU_1655	AP	16	Moreton Bay, Australia	96	Australia	NSW	NSI_Trail	-29.9277	153.39	16	4	2016	9.8	2	45.3	N/A	1	0.8	N/A	0	3/18/2016	2	4.62	4.62	4.62	0	29	In-situ	John Pandolfi, Maria Gomez-Cabrera, Brigitte Sommer, Sun Kim, Carrie Sims, Maria Beger, Eugenia Sampayo, Nicole Marie Kyriacou, Steven Dalton, Nicola Fraser, Bob Edgar, Ian Shaw	N/A	Percent mortality determined from coral counts recorded on observation data	Steven Dalton, Brigitte Sommer	sjdalts@gmail.com; brigitte.sommer@uts.edu.au	AAAA	1	2.62	N/A	N/A	N/A	N/A	-29.925	153.375	1201	6667	8653867	2015-2016	2	0	45.3
AU_1656	AP	16	Moreton Bay, Australia	96	Australia	NSW	NSI_Anemone_Bay	-29.9234	153.388	3	4	2016	9.4	2	49.5	N/A	1	5.2	N/A	0	3/18/2016	2	4.62	4.62	4.62	0	16	In-situ	John Pandolfi, Maria Gomez-Cabrera, Brigitte Sommer, Sun Kim, Carrie Sims, Maria Beger, Eugenia Sampayo, Nicole Marie Kyriacou, Steven Dalton, Hamish Malcolm, Nicola Fraser, Bob Edgar, Ian Shaw	N/A	Percent mortality determined from coral counts recorded on observation data	Steven Dalton	sjdalts@gmail.com	AAAA	1	2.62	N/A	N/A	N/A	N/A	-29.925	153.375	1201	6667	8653867	2015-2016	2	0	49.5
AU_1657	AP	16	Moreton Bay, Australia	96	Australia	NSW	North_West_Sol_Island	-30.0201	153.27	14	4	2016	5.5	2	38.1	N/A	1	1.1	N/A	0	3/15/2016	2	4.46	4.46	4.46	0	30	In-situ	John Pandolfi, Maria Gomez-Cabrera, Brigitte Sommer, Sun Kim, Carrie Sims, Maria Beger, Eugenia Sampayo, Nicole Marie Kyriacou, Steven Dalton, Hamish Malcolm	N/A	Percent mortality determined from coral counts recorded on observation data	Steven Dalton, Brigitte Sommer	sjdalts@gmail.com; brigitte.sommer@uts.edu.au	AAAA	1	0.65	N/A	N/A	N/A	N/A	-30.025	153.275	1199	6665	8639465	2015-2016	2	0	38.1
AU_1658	AP	16	Moreton Bay, Australia	96	Australia	NSW	Chopper_Rocks	-30.0079	153.256	12	4	2016	10.8	2	36.4	N/A	1	4.1	N/A	0	3/15/2016	2	4.46	4.46	4.46	0	28	In-situ	John Pandolfi, Maria Gomez-Cabrera, Brigitte Sommer, Sun Kim, Carrie Sims, Maria Beger, Eugenia Sampayo, Nicole Marie Kyriacou, Steven Dalton, Hamish Malcolm	N/A	Percent mortality determined from coral counts recorded on observation data	Steven Dalton	sjdalts@gmail.com	AAAA	1	0.65	N/A	N/A	N/A	N/A	-30.025	153.275	1199	6665	8639465	2015-2016	2	0	36.4
AU_1659	AP	16	Moreton Bay, Australia	96	Australia	NSW	Surgeons_Reef	-30.0076	153.27	12	4	2016	10.8	2	44	N/A	1	6.5	N/A	0	3/15/2016	2	4.46	4.46	4.46	0	28	In-situ	John Pandolfi, Maria Gomez-Cabrera, Brigitte Sommer, Sun Kim, Carrie Sims, Maria Beger, Eugenia Sampayo, Nicole Marie Kyriacou, Steven Dalton, Hamish Malcolm	N/A	Percent mortality determined from coral counts recorded on observation data	Steven Dalton	sjdalts@gmail.com	AAAA	1	0.65	N/A	N/A	N/A	N/A	-30.025	153.275	1199	6665	8639465	2015-2016	2	0	44
AU_166	AP	16	Northern GBR	53	Australia	Lizard Island	DGD3	-14.6693	145.444	14	9	2015	3	0	0	N/A	0	0	N/A	0	3/30/2016	0	0	0	8.63	0	N/A	In-situ	Laura Richardson	Richardson, L. E., Graham, N. A. J., Pratchett, M. S., Eurich, J. G., and A. S. Hoey. Mass coral bleaching causes biotic homogenization of reef fish assemblages. Global Change Biology, DOI: 10.1111/gcb.14119 (2018).	N/A	Laura Richardson	laura.richardson1@my.jcu.edu.au	AAAA	1	1.72	N/A	N/A	N/A	N/A	-14.675	145.425	1506	6508	10849708	2015-2016	0	0	0
AU_1660	AP	16	Moreton Bay, Australia	96	Australia	NSW	Forty_Acres_Reef	-30.2042	153.213	15	4	2016	13.3	2	28.7	N/A	1	3.2	N/A	0	3/14/2016	2	4.77	4.77	4.77	0	32	In-situ	John Pandolfi, Maria Gomez-Cabrera, Brigitte Sommer, Sun Kim, Carrie Sims, Maria Beger, Eugenia Sampayo, Nicole Marie Kyriacou, Steven Dalton, Hamish Malcolm	N/A	Percent mortality determined from coral counts recorded on observation data	Steven Dalton	sjdalts@gmail.com	AAAA	1	1.83	N/A	N/A	N/A	N/A	-30.225	153.225	1195	6664	8610664	2015-2016	2	0	28.7
AU_1661	AP	16	Moreton Bay, Australia	96	Australia	NSW	Dougherties_Wash	-29.945	153.28	19	4	2016	11.5	2	11.3	N/A	0	0.4	N/A	0	3/17/2016	2	4.18	4.18	4.18	0	33	In-situ	John Pandolfi, Maria Gomez-Cabrera, Brigitte Sommer, Sun Kim, Carrie Sims, Maria Beger, Eugenia Sampayo, Nicole Marie Kyriacou, Steven Dalton, Hamish Malcolm	N/A	Percent mortality determined from coral counts recorded on observation data	Steven Dalton	sjdalts@gmail.com	AAAA	1	0.75	N/A	N/A	N/A	N/A	-29.925	153.275	1201	6665	8653865	2015-2016	2	0	11.3
AU_1662	AP	16	Moreton Bay, Australia	96	Australia	NSW	Muttonbird_Island	-30.3037	153.151	22	4	2016	8.5	1	5.6	N/A	0	0	N/A	0	3/13/2016	2	4	4	4	0	40	In-situ	John Pandolfi, Maria Gomez-Cabrera, Brigitte Sommer, Sun Kim, Carrie Sims, Maria Beger, Eugenia Sampayo, Nicole Marie Kyriacou	N/A	Percent mortality determined from coral counts recorded on observation data	Brigitte Sommer	brigitte.sommer@uts.edu.au	AAAA	1	2.32	N/A	N/A	N/A	N/A	-30.325	153.175	1193	6663	8596263	2015-2016	1	0	5.6
AU_1663	AP	16	Moreton Bay, Australia	96	Australia	NSW	North_Rock	-29.9734	153.257	16	4	2016	10	2	34.4	N/A	1	3	N/A	0	3/17/2016	2	4.11	4.11	4.11	0	30	In-situ	John Pandolfi, Maria Gomez-Cabrera, Brigitte Sommer, Sun Kim, Carrie Sims, Maria Beger, Eugenia Sampayo, Nicole Marie Kyriacou	N/A	Percent mortality determined from coral counts recorded on observation data	Brigitte Sommer	brigitte.sommer@uts.edu.au	AAAA	1	0.62	N/A	N/A	N/A	N/A	-29.975	153.275	1200	6665	8646665	2015-2016	2	0	34.4
AU_1664	AP	16	Moreton Bay, Australia	96	Australia	NSW	Woolgoolga_Headland	-30.1082	153.211	13	4	2016	6	3	63.5	N/A	1	8.8	N/A	0	3/14/2016	2	4.16	4.16	4.16	0	30	In-situ	John Pandolfi, Maria Gomez-Cabrera, Brigitte Sommer, Sun Kim, Carrie Sims, Maria Beger, Eugenia Sampayo, Nicole Marie Kyriacou	N/A	Percent mortality determined from coral counts recorded on observation data	Brigitte Sommer	brigitte.sommer@uts.edu.au	AAAA	1	0.8	N/A	N/A	N/A	N/A	-30.125	153.225	1197	6664	8625064	2015-2016	3	0	63.5
AU_1665	AP	16	Moreton Bay, Australia	96	Australia	NSW	Woolgoolga_Reef	-30.0937	153.206	13	4	2016	3	3	59	N/A	2	10.8	N/A	0	3/15/2016	2	4.26	4.26	4.26	0	29	In-situ	John Pandolfi, Maria Gomez-Cabrera, Brigitte Sommer, Sun Kim, Carrie Sims, Maria Beger, Eugenia Sampayo, Nicole Marie Kyriacou	N/A	Percent mortality determined from coral counts recorded on observation data	Brigitte Sommer	brigitte.sommer@uts.edu.au	AAAA	1	0.77	N/A	N/A	N/A	N/A	-30.075	153.225	1198	6664	8632264	2015-2016	3	0	59
AU_1666	AP	16	Moreton Bay, Australia	96	Australia	NSW	Split_Sol_Island	-30.2391	153.18	2	4	2016	11.8	2	30.9	N/A	1	1.8	N/A	0	3/14/2016	2	4.35	4.35	4.35	0	19	In-situ	John Pandolfi, Maria Gomez-Cabrera, Brigitte Sommer, Sun Kim, Carrie Sims, Maria Beger, Eugenia Sampayo, Nicole Marie Kyriacou, Steven Dalton, Hamish Malcolm	N/A	Percent mortality determined from coral counts recorded on observation data	Steven Dalton	sjdalts@gmail.com	AAAA	1	1.18	N/A	N/A	N/A	N/A	-30.225	153.175	1195	6663	8610663	2015-2016	2	0	30.9
AU_1667	AP	16	Moreton Bay, Australia	96	Australia	NSW	Split_Bommie	-30.2403	153.193	15	4	2016	12	2	11.5	N/A	0	0.2	N/A	0	3/14/2016	2	4.35	4.35	4.35	0	32	In-situ	John Pandolfi, Maria Gomez-Cabrera, Brigitte Sommer, Sun Kim, Carrie Sims, Maria Beger, Eugenia Sampayo, Nicole Marie Kyriacou, Steven Dalton, Hamish Malcolm	N/A	Percent mortality determined from coral counts recorded on observation data	Steven Dalton	sjdalts@gmail.com	AAAA	1	1.18	N/A	N/A	N/A	N/A	-30.225	153.175	1195	6663	8610663	2015-2016	2	0	11.5
AU_1668	AP	16	Moreton Bay, Australia	96	Australia	NSW	South_Sol_Island	-30.2048	153.265	15	4	2016	10	3	70.9	N/A	2	13.6	N/A	0	3/14/2016	2	4.91	4.91	4.91	0	32	In-situ	John Pandolfi, Maria Gomez-Cabrera, Brigitte Sommer, Sun Kim, Carrie Sims, Maria Beger, Eugenia Sampayo, Nicole Marie Kyriacou, Steven Dalton, Matthew Harrison, Nicola Fraser, Bob Edgar, Ian Shaw	N/A	Percent mortality determined from coral counts recorded on observation data	Steven Dalton, Brigitte Sommer	sjdalts@gmail.com; brigitte.sommer@uts.edu.au	AAAA	1	3.22	N/A	N/A	N/A	N/A	-30.225	153.275	1195	6665	8610665	2015-2016	3	0	70.9
AU_1669	AP	16	Moreton Bay, Australia	96	Australia	NSW	South_West_Sol_Island	-30.1592	153.228	12	4	2016	10.5	2	43.9	N/A	1	1.3	N/A	0	3/14/2016	2	4.37	4.37	4.37	0	29	In-situ	John Pandolfi, Maria Gomez-Cabrera, Brigitte Sommer, Sun Kim, Carrie Sims, Maria Beger, Eugenia Sampayo, Nicole Marie Kyriacou, Steven Dalton, Hamish Malcolm	N/A	Percent mortality determined from coral counts recorded on observation data	Steven Dalton, Brigitte Sommer	sjdalts@gmail.com; brigitte.sommer@uts.edu.au	AAAA	1	1.15	N/A	N/A	N/A	N/A	-30.175	153.225	1196	6664	8617864	2015-2016	2	0	43.9
AU_167	AP	16	Northern GBR	53	Australia	Lizard Island	Mix1	-14.686	145.442	10	9	2015	4	0	0	N/A	0	0	N/A	0	3/30/2016	0	0	0	8.63	0	N/A	In-situ	Laura Richardson	Richardson, L. E., Graham, N. A. J., Pratchett, M. S., Eurich, J. G., and A. S. Hoey. Mass coral bleaching causes biotic homogenization of reef fish assemblages. Global Change Biology, DOI: 10.1111/gcb.14119 (2018).	N/A	Laura Richardson	laura.richardson1@my.jcu.edu.au	AAAA	1	1.72	N/A	N/A	N/A	N/A	-14.675	145.425	1506	6508	10849708	2015-2016	0	0	0
AU_1670	AP	16	Moreton Bay, Australia	96	Australia	NSW	Cook_Island	-28.1963	153.576	16	10	2016	10	1	2	N/A	1	1	N/A	0	2/12/2017	0	0	0	0.34	0	N/A	In-situ	John Pandolfi, Maria Gomez-Cabrera, Brigitte Sommer, Sun Kim, Carrie Sims, Maria Beger, Eugenia Sampayo, Nicole Marie Kyriacou,	N/A	Percent mortality determined from coral counts recorded on observation data	Brigitte Sommer	brigitte.sommer@uts.edu.au	AAAA	1	0.63	N/A	N/A	N/A	N/A	-28.175	153.575	1236	6671	8905871	2016-2017	1	0	2
AU_1671	AP	16	Moreton Bay, Australia	96	Australia	QLD	Goat_Island	-27.5156	153.383	12	10	2016	3	1	0	N/A	1	1.6	N/A	0	3/5/2017	0	0	0	8.75	0	N/A	In-situ	John Pandolfi, Maria Gomez-Cabrera, Brigitte Sommer, Sun Kim, Carrie Sims, Maria Beger, Eugenia Sampayo, Nicole Marie Kyriacou,	N/A	Percent mortality determined from coral counts recorded on observation data	Brigitte Sommer	brigitte.sommer@uts.edu.au	AAAA	1	0.3	1.72	N/A	N/A	N/A	-27.525	153.375	1249	6667	8999467	2016-2017	0	1	0
AU_1672	AP	16	Moreton Bay, Australia	96	Australia	QLD	Myora_Reef	-27.475	153.375	12	10	2016	3	1	3.5	N/A	1	3.5	N/A	0	3/5/2017	0	0	0	8.69	0	N/A	In-situ	John Pandolfi, Maria Gomez-Cabrera, Brigitte Sommer, Sun Kim, Carrie Sims, Maria Beger, Eugenia Sampayo, Nicole Marie Kyriacou	N/A	Percent mortality determined from coral counts recorded on observation data	Brigitte Sommer	brigitte.sommer@uts.edu.au	AAAA	1	0.31	1.93	N/A	N/A	N/A	-27.475	153.375	1250	6667	9006667	2016-2017	1	0	3.5
AU_1673	AP	16	Moreton Bay, Australia	96	Australia	QLD	Peel_Island	-27.4952	153.333	12	10	2016	3	0	0	N/A	0	0	N/A	0	3/5/2017	0	0	0	10.14	0	N/A	In-situ	John Pandolfi, Maria Gomez-Cabrera, Brigitte Sommer, Sun Kim, Carrie Sims, Maria Beger, Eugenia Sampayo, Nicole Marie Kyriacou	N/A	Percent mortality determined from coral counts recorded on observation data	Brigitte Sommer	brigitte.sommer@uts.edu.au	AAAA	1	0.29	2.62	N/A	N/A	N/A	-27.475	153.325	1250	6666	9006666	2016-2017	0	0	0
AU_1674	AP	16	Moreton Bay, Australia	96	Australia	QLD	Flinders_Reef	-26.9777	153.484	13	10	2016	9	1	6.3	N/A	0	0	N/A	0	3/22/2017	0	0	0	3.62	0	N/A	In-situ	John Pandolfi, Maria Gomez-Cabrera, Brigitte Sommer, Sun Kim, Carrie Sims, Maria Beger, Eugenia Sampayo, Nicole Marie Kyriacou, Steven Dalton, Hamish Malcolm	N/A	Percent mortality determined from coral counts recorded on observation data	Steven Dalton, Brigitte Sommer	sjdalts@gmail.com; brigitte.sommer@uts.edu.au	AAAA	1	0.45	0.82	N/A	N/A	N/A	-26.975	153.475	1260	6669	9078669	2016-2017	1	0	6.3
AU_1675	AP	16	Moreton Bay, Australia	96	Australia	NSW	North_West_Sol_Island	-30.019	153.27	18	10	2016	7	1	3	N/A	2	11.8	N/A	0	6/1/2016	2	0	0	1.08	0	217	In-situ	John Pandolfi, Maria Gomez-Cabrera, Brigitte Sommer, Sun Kim, Carrie Sims, Maria Beger, Eugenia Sampayo, Nicole Marie Kyriacou, Steven Dalton, Hamish Malcolm	N/A	Percent mortality determined from coral counts recorded on observation data	Steven Dalton, Brigitte Sommer	sjdalts@gmail.com; brigitte.sommer@uts.edu.au	AAAA	1	4.46	0.65	N/A	N/A	N/A	-30.025	153.275	1199	6665	8639465	2016-2017	1	0	3
AU_1676	AP	16	Moreton Bay, Australia	96	Australia	NSW	North_Rock	-29.9734	153.257	18	10	2016	10	1	1	N/A	1	6.2	N/A	0	6/1/2016	2	0	0	1.22	0	215	In-situ	John Pandolfi, Maria Gomez-Cabrera, Brigitte Sommer, Sun Kim, Carrie Sims, Maria Beger, , Eugenia Sampayo, Nicole Marie Kyriacou, Steven Dalton, Hamish Malcolm	N/A	Percent mortality determined from coral counts recorded on observation data	Steven Dalton, Brigitte Sommer	sjdalts@gmail.com; brigitte.sommer@uts.edu.au	AAAA	1	4.11	0.62	N/A	N/A	N/A	-29.975	153.275	1200	6665	8646665	2016-2017	1	0	1
AU_1677	AP	16	Moreton Bay, Australia	96	Australia	NSW	Woolgoolga_Reef	-30.0937	153.206	19	10	2016	8.5	1	2.4	N/A	2	39.1	N/A	0	6/1/2016	2	0	0	1.05	0	218	In-situ	John Pandolfi, Maria Gomez-Cabrera, Brigitte Sommer, Sun Kim, Carrie Sims, Maria Beger, , Eugenia Sampayo, Nicole Marie Kyriacou, Steven Dalton, Hamish Malcolm	N/A	Percent mortality determined from coral counts recorded on observation data	Steven Dalton, Brigitte Sommer	sjdalts@gmail.com; brigitte.sommer@uts.edu.au	AAAA	1	4.26	0.77	N/A	N/A	N/A	-30.075	153.225	1198	6664	8632264	2016-2017	1	0	2.4
AU_1678	AP	16	Moreton Bay, Australia	96	Australia	NSW	Woolgoolga_Headland	-30.1082	153.211	19	10	2016	3	0	0	N/A	1	2	N/A	0	6/1/2016	2	0	0	0.91	0	219	In-situ	John Pandolfi, Maria Gomez-Cabrera, Brigitte Sommer, Sun Kim, Carrie Sims, Maria Beger, , Eugenia Sampayo, Nicole Marie Kyriacou, Steven Dalton, Hamish Malcolm	N/A	Percent mortality determined from coral counts recorded on observation data	Steven Dalton, Brigitte Sommer	sjdalts@gmail.com; brigitte.sommer@uts.edu.au	AAAA	1	4.16	0.8	N/A	N/A	N/A	-30.125	153.225	1197	6664	8625064	2016-2017	0	0	0
AU_1679	AP	16	Moreton Bay, Australia	96	Australia	NSW	NSI_Trail	-29.9277	153.39	20	10	2016	9.8	1	0.8	N/A	2	20	N/A	0	3/5/2017	0	0	0	2.77	0	N/A	In-situ	John Pandolfi, Maria Gomez-Cabrera, Brigitte Sommer, Sun Kim, Carrie Sims, Maria Beger, , Eugenia Sampayo, Nicole Marie Kyriacou, Steven Dalton, Hamish Malcolm	N/A	Percent mortality determined from coral counts recorded on observation data	Steven Dalton, Brigitte Sommer	sjdalts@gmail.com; brigitte.sommer@uts.edu.au	AAAA	1	4.62	2.62	N/A	N/A	N/A	-29.925	153.375	1201	6667	8653867	2016-2017	1	0	0.8
AU_168	AP	16	Northern GBR	53	Australia	Lizard Island	Mix2	-14.6965	145.45	9	9	2015	1	0	0	N/A	0	0	N/A	0	3/30/2016	0	0	0	8.63	0	N/A	In-situ	Laura Richardson	Richardson, L. E., Graham, N. A. J., Pratchett, M. S., Eurich, J. G., and A. S. Hoey. Mass coral bleaching causes biotic homogenization of reef fish assemblages. Global Change Biology, DOI: 10.1111/gcb.14119 (2018).	N/A	Laura Richardson	laura.richardson1@my.jcu.edu.au	AAAA	1	1.72	N/A	N/A	N/A	N/A	-14.675	145.425	1506	6508	10849708	2015-2016	0	0	0
AU_1680	AP	16	Moreton Bay, Australia	96	Australia	NSW	South_West_Sol_Island	-30.1592	153.228	21	10	2016	9	1	2.1	N/A	1	6.2	N/A	0	6/1/2016	2	0	0	0.92	0	221	In-situ	John Pandolfi, Maria Gomez-Cabrera, Brigitte Sommer, Sun Kim, Carrie Sims, Maria Beger, Eugenia Sampayo, Nicole Marie Kyriacou, Steven Dalton, Hamish Malcolm	N/A	Percent mortality determined from coral counts recorded on observation data	Steven Dalton, Brigitte Sommer	sjdalts@gmail.com; brigitte.sommer@uts.edu.au	AAAA	1	4.37	1.15	N/A	N/A	N/A	-30.175	153.225	1196	6664	8617864	2016-2017	1	0	2.1
AU_1681	AP	16	Moreton Bay, Australia	96	Australia	NSW	South_Sol_Island	-30.2048	153.265	28	10	2016	10	1	0.7	N/A	2	34.1	N/A	0	6/1/2016	2	0	0	0.97	0	228	In-situ	John Pandolfi, Maria Gomez-Cabrera, Brigitte Sommer, Sun Kim, Carrie Sims, Maria Beger, , Eugenia Sampayo, Nicole Marie Kyriacou, Steven Dalton, Hamish Malcolm	N/A	Percent mortality determined from coral counts recorded on observation data	Steven Dalton, Brigitte Sommer	sjdalts@gmail.com; brigitte.sommer@uts.edu.au	AAAA	1	4.91	3.22	N/A	N/A	N/A	-30.225	153.275	1195	6665	8610665	2016-2017	1	0	0.7
AU_1682	AP	16	Moreton Bay, Australia	96	Australia	QLD	Flinders_Reef	-26.9777	153.484	28	8	2017	9	1	3	N/A	-1	N/A	N/A	0	6/1/2017	2	0	0	1.15	0	159	In-situ	Maria Beger, John Pandolfi, James Cant, Sun Kim, Carrie Sims, Eugenia Sampayo, Nicole Marie Kyriacou, Steven Dalton, Hamish Malcolm	N/A	Percent mortality determined from coral counts recorded on observation data	Maria Beger	m.beger@leeds.ac.uk; bsjic@leeds.ac.uk	AA	1	3.62	0.45	0.82	N/A	N/A	-26.975	153.475	1260	6669	9078669	2016-2017	1	0	3
AU_1683	AP	16	Moreton Bay, Australia	96	Australia	NSW	North_West_Sol_Island	-30.019	153.27	27	8	2017	7	0	0	N/A	-1	N/A	N/A	0	3/6/2018	0	0	0	1.76	0	N/A	In-situ	Maria Beger, John Pandolfi, James Cant, Sun Kim, Carrie Sims, Eugenia Sampayo, Nicole Marie Kyriacou, Steven Dalton, Hamish Malcolm	N/A	Percent mortality determined from coral counts recorded on observation data	Maria Beger	m.beger@leeds.ac.uk; bsjic@leeds.ac.uk	AA	1	0.75	4.46	0.65	N/A	N/A	-30.025	153.275	1199	6665	8639465	2016-2017	0	0	0
AU_1684	AP	16	Moreton Bay, Australia	96	Australia	NSW	South_Sol_Island	-30.2048	153.265	24	8	2017	10	0	0	N/A	-1	N/A	N/A	0	3/8/2018	0	0	0	2.62	0	N/A	In-situ	Maria Beger, John Pandolfi, James Cant, Sun Kim, Carrie Sims, Eugenia Sampayo, Nicole Marie Kyriacou, Steven Dalton, Hamish Malcolm	N/A	Percent mortality determined from coral counts recorded on observation data	Maria Beger	m.beger@leeds.ac.uk; bsjic@leeds.ac.uk	AA	1	0.88	4.91	3.22	N/A	N/A	-30.225	153.275	1195	6665	8610665	2016-2017	0	0	0
AU_1685	AP	16	Moreton Bay, Australia	96	Australia	NSW	South_West_Sol_Island	-30.1592	153.228	24	8	2017	9	0	0	N/A	-1	N/A	N/A	0	3/8/2018	0	0	0	2.12	0	N/A	In-situ	Maria Beger, John Pandolfi, James Cant, Sun Kim, Carrie Sims, Eugenia Sampayo, Nicole Marie Kyriacou, Steven Dalton, Hamish Malcolm	N/A	Percent mortality determined from coral counts recorded on observation data	Maria Beger	m.beger@leeds.ac.uk; bsjic@leeds.ac.uk	AA	1	0.32	4.37	1.15	N/A	N/A	-30.175	153.225	1196	6664	8617864	2016-2017	0	0	0
AU_1686	AP	16	Moreton Bay, Australia	96	Australia	NSW	NSI_Trail	-29.9277	153.39	23	8	2017	9.8	0	0	N/A	-1	N/A	N/A	0	3/6/2018	0	0	0	1.34	0	N/A	In-situ	Maria Beger, John Pandolfi, James Cant, Sun Kim, Carrie Sims, Eugenia Sampayo, Nicole Marie Kyriacou, Steven Dalton, Hamish Malcolm	N/A	Percent mortality determined from coral counts recorded on observation data	Maria Beger	m.beger@leeds.ac.uk; bsjic@leeds.ac.uk	AA	1	2.77	4.62	2.62	N/A	N/A	-29.925	153.375	1201	6667	8653867	2016-2017	0	0	0
AU_1687	AP	16	Moreton Bay, Australia	96	Australia	NSW	Black_Rock	-30.9484	153.076	22	8	2017	8	0	0	N/A	-1	N/A	N/A	0	3/6/2018	0	0	0	2.61	0	N/A	In-situ	Maria Beger, John Pandolfi, James Cant, Sun Kim, Carrie Sims, Eugenia Sampayo, Nicole Marie Kyriacou, Steven Dalton, Hamish Malcolm	N/A	Percent mortality determined from coral counts recorded on observation data	Maria Beger	m.beger@leeds.ac.uk; bsjic@leeds.ac.uk	AA	1	1.94	4.24	4.16	N/A	N/A	-30.925	153.075	1181	6661	8509861	2016-2017	0	0	0
AU_1688	AP	16	Moreton Bay, Australia	96	Australia	NSW	Cook_Island	-28.1963	153.576	16	8	2017	9	0	0	N/A	-1	N/A	N/A	0	3/7/2018	0	0	0	0.3	0	N/A	In-situ	Maria Beger, John Pandolfi, James Cant, Sun Kim, Carrie Sims, Eugenia Sampayo, Nicole Marie Kyriacou, Steven Dalton, Hamish Malcolm	N/A	Percent mortality determined from coral counts recorded on observation data	Maria Beger	m.beger@leeds.ac.uk; bsjic@leeds.ac.uk	AA	1	0.34	0.63	N/A	N/A	N/A	-28.175	153.575	1236	6671	8905871	2016-2017	0	0	0
AU_1689	AP	16	Moreton Bay, Australia	96	Australia	NSW	Woolgoolga_Reef	-30.0937	153.206	17	8	2017	8.5	0	0	N/A	-1	N/A	N/A	0	3/6/2018	0	0	0	1.73	0	N/A	In-situ	Maria Beger, John Pandolfi, James Cant, Sun Kim, Carrie Sims, Eugenia Sampayo, Nicole Marie Kyriacou, Steven Dalton, Hamish Malcolm	N/A	Percent mortality determined from coral counts recorded on observation data	Maria Beger	m.beger@leeds.ac.uk; bsjic@leeds.ac.uk	AA	1	4.26	0.77	N/A	N/A	N/A	-30.075	153.225	1198	6664	8632264	2016-2017	0	0	0
AU_169	AP	16	Northern GBR	53	Australia	Lizard Island	Mix3	-14.6872	145.455	13	9	2015	2	0	0	N/A	0	0	N/A	0	3/30/2016	0	0	0	8.61	0	N/A	In-situ	Laura Richardson	Richardson, L. E., Graham, N. A. J., Pratchett, M. S., Eurich, J. G., and A. S. Hoey. Mass coral bleaching causes biotic homogenization of reef fish assemblages. Global Change Biology, DOI: 10.1111/gcb.14119 (2018).	N/A	Laura Richardson	laura.richardson1@my.jcu.edu.au	AAAA	1	1.69	N/A	N/A	N/A	N/A	-14.675	145.475	1506	6509	10849709	2015-2016	0	0	0
AU_1690	AP	16	Moreton Bay, Australia	96	Australia	NSW	Woolgoolga_Headland	-30.1082	153.211	17	8	2017	3	0	0	N/A	-1	N/A	N/A	0	3/6/2018	0	0	0	1.76	0	N/A	In-situ	Maria Beger, John Pandolfi, James Cant, Sun Kim, Carrie Sims, Eugenia Sampayo, Nicole Marie Kyriacou, Steven Dalton, Hamish Malcolm	N/A	Percent mortality determined from coral counts recorded on observation data	Maria Beger	m.beger@leeds.ac.uk; bsjic@leeds.ac.uk	AA	1	0.29	4.16	0.8	N/A	N/A	-30.125	153.225	1197	6664	8625064	2016-2017	0	0	0
AU_1691	AP	16	Northern GBR	53	Australia	Cairns GBR	Saxon Reef Flat	-16.4605	145.984	23	4	2016	2	3	91.01	N/A	2	30.84	N/A	0	3/25/2016	2	4.96	4.77	4.96	0	29	In-situ	Australian Institute of Marine Science	N/A	N/A	Neal Cantin	N.Cantin@aims.gov.au	AAAA	1	1.76	N/A	N/A	N/A	N/A	-16.475	145.975	1470	6519	10590519	2015-2016	3	0	91.01
AU_1692	AP	16	Northern GBR	53	Australia	Cairns GBR	Saxon Reef Front	-16.4596	145.989	22	4	2016	4	3	79.8	N/A	1	9.73	N/A	0	3/25/2016	2	4.96	4.96	4.96	0	28	In-situ	Australian Institute of Marine Science	N/A	N/A	Neal Cantin	N.Cantin@aims.gov.au	AAAA	1	1.76	N/A	N/A	N/A	N/A	-16.475	145.975	1470	6519	10590519	2015-2016	3	0	79.8
AU_1693	AP	16	Northern GBR	53	Australia	Cairns GBR	Saxon Reef Front	-16.4596	145.989	22	4	2016	7	3	74.25	N/A	2	14.74	N/A	0	3/25/2016	2	4.96	4.96	4.96	0	28	In-situ	Australian Institute of Marine Science	N/A	N/A	Neal Cantin	N.Cantin@aims.gov.au	AAAA	1	1.76	N/A	N/A	N/A	N/A	-16.475	145.975	1470	6519	10590519	2015-2016	3	0	74.25
AU_1694	AP	16	Northern GBR	53	Australia	Cairns GBR	Fitzroy Island West MMP1	-16.9233	145.996	25	4	2016	2	2	11.01	N/A	0	0	N/A	0	3/2/2016	2	3.15	2.84	3.15	0	54	In-situ	Australian Institute of Marine Science	N/A	N/A	Neal Cantin	N.Cantin@aims.gov.au	AAAA	1	1.38	N/A	N/A	N/A	N/A	-16.925	145.975	1461	6519	10525719	2015-2016	2	0	11.01
AU_1695	AP	16	Northern GBR	53	Australia	Cairns GBR	Fitzroy Island West MMP1	-16.9231	145.996	25	4	2016	5	2	12.77	N/A	0	0	N/A	0	3/2/2016	2	3.15	2.84	3.15	0	54	In-situ	Australian Institute of Marine Science	N/A	N/A	Neal Cantin	N.Cantin@aims.gov.au	AAAA	1	1.38	N/A	N/A	N/A	N/A	-16.925	145.975	1461	6519	10525719	2015-2016	2	0	12.77
AU_1696	AP	16	Northern GBR	53	Australia	Cairns GBR	Fitzroy Island West Resort	-16.9331	145.985	25	4	2016	3	1	10	N/A	0	0	N/A	0	3/2/2016	2	3.15	2.84	3.15	0	54	In-situ	Australian Institute of Marine Science	N/A	N/A	Neal Cantin	N.Cantin@aims.gov.au	AAAA	1	1.38	N/A	N/A	N/A	N/A	-16.925	145.975	1461	6519	10525719	2015-2016	1	0	10
AU_1697	AP	16	Northern GBR	53	Australia	Cairns GBR	Fitzroy Island West Resort	-16.9331	145.984	25	4	2016	7	1	7.79	N/A	0	0	N/A	0	3/2/2016	2	3.15	2.84	3.15	0	54	In-situ	Australian Institute of Marine Science	N/A	N/A	Neal Cantin	N.Cantin@aims.gov.au	AAAA	1	1.38	N/A	N/A	N/A	N/A	-16.925	145.975	1461	6519	10525719	2015-2016	1	0	7.79
AU_1698	AP	16	Northern GBR	53	Australia	Cairns GBR	Hastings N Flat	-16.4997	146.015	22	4	2016	2	3	95.71	N/A	2	35.95	N/A	0	3/25/2016	2	5.84	5.84	5.84	0	28	In-situ	Australian Institute of Marine Science	N/A	N/A	Neal Cantin	N.Cantin@aims.gov.au	AAAA	1	1.48	N/A	N/A	N/A	N/A	-16.475	146.025	1470	6520	10590520	2015-2016	3	0	95.71
AU_1699	AP	16	Northern GBR	53	Australia	Cairns GBR	Arlington Reef Flat L1	-16.6424	146.101	21	4	2016	1	3	63.41	N/A	1	3.9	N/A	0	3/28/2016	2	5.31	5.31	5.31	0	24	In-situ	Australian Institute of Marine Science	N/A	N/A	Neal Cantin	N.Cantin@aims.gov.au	AAAA	1	2.56	N/A	N/A	N/A	N/A	-16.625	146.125	1467	6522	10568922	2015-2016	3	0	63.41
AU_170	AP	16	Northern GBR	53	Australia	Lizard Island	Mix4	-14.6829	145.449	16	9	2015	2	0	0	N/A	0	0	N/A	0	3/30/2016	0	0	0	8.63	0	N/A	In-situ	Laura Richardson	Richardson, L. E., Graham, N. A. J., Pratchett, M. S., Eurich, J. G., and A. S. Hoey. Mass coral bleaching causes biotic homogenization of reef fish assemblages. Global Change Biology, DOI: 10.1111/gcb.14119 (2018).	N/A	Laura Richardson	laura.richardson1@my.jcu.edu.au	AAAA	1	1.72	N/A	N/A	N/A	N/A	-14.675	145.425	1506	6508	10849708	2015-2016	0	0	0
AU_1700	AP	16	Northern GBR	53	Australia	Cairns GBR	Arlington NE Flank LTMP1_K4	-16.6465	146.11	21	4	2016	6	2	46.17	N/A	0	0.36	N/A	0	3/28/2016	2	5.31	5.31	5.31	0	24	In-situ	Australian Institute of Marine Science	N/A	N/A	Neal Cantin	N.Cantin@aims.gov.au	AAAA	1	2.56	N/A	N/A	N/A	N/A	-16.625	146.125	1467	6522	10568922	2015-2016	2	0	46.17
AU_1701	AP	16	Northern GBR	53	Australia	Cairns GBR	Arlington NE Flank LTMP1_K4	-16.6465	146.11	21	4	2016	8	2	28.29	N/A	0	0.25	N/A	0	3/28/2016	2	5.31	5.31	5.31	0	24	In-situ	Australian Institute of Marine Science	N/A	N/A	Neal Cantin	N.Cantin@aims.gov.au	AAAA	1	2.56	N/A	N/A	N/A	N/A	-16.625	146.125	1467	6522	10568922	2015-2016	2	0	28.29
AU_1702	AP	16	Northern GBR	53	Australia	Cairns GBR	Coates NE Front	-17.1922	146.38	19	4	2016	4	2	37.07	N/A	1	0.89	N/A	0	3/1/2016	2	2.47	2.47	2.47	0	49	In-situ	Australian Institute of Marine Science	N/A	N/A	Neal Cantin	N.Cantin@aims.gov.au	AAAA	1	1.9	N/A	N/A	N/A	N/A	-17.175	146.375	1456	6527	10489727	2015-2016	2	0	37.07
AU_1703	AP	16	Northern GBR	53	Australia	Cairns GBR	Coates NE Front	-17.1922	146.38	19	4	2016	7	3	52	N/A	1	7.65	N/A	0	3/1/2016	2	2.47	2.47	2.47	0	49	In-situ	Australian Institute of Marine Science	N/A	N/A	Neal Cantin	N.Cantin@aims.gov.au	AAAA	1	1.9	N/A	N/A	N/A	N/A	-17.175	146.375	1456	6527	10489727	2015-2016	3	0	52
AU_1704	AP	16	Northern GBR	53	Australia	Innisfail GBR	McCulloch (No. 1) NE Flat_J3	-17.2872	146.475	18	4	2016	2	2	36.9	N/A	1	9.66	N/A	0	3/25/2016	2	3.1	3.1	3.1	0	24	In-situ	Australian Institute of Marine Science	N/A	N/A	Neal Cantin	N.Cantin@aims.gov.au	AAAA	1	2.49	N/A	N/A	N/A	N/A	-17.275	146.475	1454	6529	10475329	2015-2016	2	0	36.9
AU_1705	AP	16	Northern GBR	53	Australia	Innisfail GBR	Gibson E Front	-17.2786	146.376	18	4	2016	3	2	42.64	N/A	1	9.2	N/A	0	3/1/2016	2	2.25	2.25	2.25	0	48	In-situ	Australian Institute of Marine Science	N/A	N/A	Neal Cantin	N.Cantin@aims.gov.au	AAAA	1	2.09	N/A	N/A	N/A	N/A	-17.275	146.375	1454	6527	10475327	2015-2016	2	0	42.64
AU_1706	AP	16	Northern GBR	53	Australia	Innisfail GBR	Gibson E Front	-17.2786	146.376	18	4	2016	6	2	33.81	N/A	1	1.26	N/A	0	3/1/2016	2	2.25	2.25	2.25	0	48	In-situ	Australian Institute of Marine Science	N/A	N/A	Neal Cantin	N.Cantin@aims.gov.au	AAAA	1	2.09	N/A	N/A	N/A	N/A	-17.275	146.375	1454	6527	10475327	2015-2016	2	0	33.81
AU_1707	AP	16	Northern GBR	53	Australia	Innisfail GBR	Peart N Flat	-17.4654	146.4	17	4	2016	2	2	33.49	N/A	1	0.63	N/A	0	3/1/2016	2	2.29	2.29	2.29	0	47	In-situ	Australian Institute of Marine Science	N/A	N/A	Neal Cantin	N.Cantin@aims.gov.au	AAAA	1	2.27	N/A	N/A	N/A	N/A	-17.475	146.375	1450	6527	10446527	2015-2016	2	0	33.49
AU_1708	AP	16	Northern GBR	53	Australia	Innisfail GBR	Peart NE Front LTMP2	-17.4665	146.401	17	4	2016	3	2	24.87	N/A	1	1.3	N/A	0	3/1/2016	2	2.28	2.28	2.28	0	47	In-situ	Australian Institute of Marine Science	N/A	N/A	Neal Cantin	N.Cantin@aims.gov.au	AAAA	1	2.29	N/A	N/A	N/A	N/A	-17.475	146.425	1450	6528	10446528	2015-2016	2	0	24.87
AU_1709	AP	16	Northern GBR	53	Australia	Innisfail GBR	Peart NE Front LTMP2	-17.4665	146.401	17	4	2016	6	2	22.41	N/A	1	1.66	N/A	0	3/1/2016	2	2.28	2.28	2.28	0	47	In-situ	Australian Institute of Marine Science	N/A	N/A	Neal Cantin	N.Cantin@aims.gov.au	AAAA	1	2.29	N/A	N/A	N/A	N/A	-17.475	146.425	1450	6528	10446528	2015-2016	2	0	22.41
AU_171	AP	16	Northern GBR	53	Australia	Lizard Island	MP1	-14.6896	145.467	7	9	2015	3	0	0	N/A	0	0	N/A	0	3/30/2016	0	0	0	8.61	0	N/A	In-situ	Laura Richardson	Richardson, L. E., Graham, N. A. J., Pratchett, M. S., Eurich, J. G., and A. S. Hoey. Mass coral bleaching causes biotic homogenization of reef fish assemblages. Global Change Biology, DOI: 10.1111/gcb.14119 (2018).	N/A	Laura Richardson	laura.richardson1@my.jcu.edu.au	AAAA	1	1.69	N/A	N/A	N/A	N/A	-14.675	145.475	1506	6509	10849709	2015-2016	0	0	0
AU_1710	AP	16	Northern GBR	53	Australia	Innisfail GBR	Feather North Flat_H1	-17.5187	146.387	15	4	2016	2	2	29.95	N/A	1	4.03	N/A	0	3/1/2016	2	2.3	2.3	2.3	0	45	In-situ	Australian Institute of Marine Science	N/A	N/A	Neal Cantin	N.Cantin@aims.gov.au	AAAA	1	2.25	N/A	N/A	N/A	N/A	-17.525	146.375	1449	6527	10439327	2015-2016	2	0	29.95
AU_1711	AP	16	Northern GBR	53	Australia	Townsville GBR	Farquharson NW Flat_F3	-17.7803	146.533	13	4	2016	2	2	42.11	N/A	1	1.56	N/A	0	3/1/2016	2	2.46	2.46	2.46	0	43	In-situ	Australian Institute of Marine Science	N/A	N/A	Neal Cantin	N.Cantin@aims.gov.au	AAAA	1	2.25	N/A	N/A	N/A	N/A	-17.775	146.525	1444	6530	10403330	2015-2016	2	0	42.11
AU_1712	AP	16	Northern GBR	53	Australia	Townsville GBR	Farquharson NE Front F1_F2	-17.7914	146.532	13	4	2016	4	2	31.43	N/A	1	0.61	N/A	0	3/1/2016	2	2.46	2.46	2.46	0	43	In-situ	Australian Institute of Marine Science	N/A	N/A	Neal Cantin	N.Cantin@aims.gov.au	AAAA	1	2.25	N/A	N/A	N/A	N/A	-17.775	146.525	1444	6530	10403330	2015-2016	2	0	31.43
AU_1713	AP	16	Northern GBR	53	Australia	Townsville GBR	Farquharson NE Front F1_F2	-17.7914	146.532	13	4	2016	7	2	35.71	N/A	1	0.71	N/A	0	3/1/2016	2	2.46	2.46	2.46	0	43	In-situ	Australian Institute of Marine Science	N/A	N/A	Neal Cantin	N.Cantin@aims.gov.au	AAAA	1	2.25	N/A	N/A	N/A	N/A	-17.775	146.525	1444	6530	10403330	2015-2016	2	0	35.71
AU_1714	AP	16	Northern GBR	53	Australia	Townsville GBR	Taylor N Flat_G1	-17.8115	146.572	14	4	2016	2	2	44.79	N/A	0	0.31	N/A	0	3/1/2016	2	2.32	2.32	2.32	0	44	In-situ	Australian Institute of Marine Science	N/A	N/A	Neal Cantin	N.Cantin@aims.gov.au	AAAA	1	2.25	N/A	N/A	N/A	N/A	-17.825	146.575	1443	6531	10396131	2015-2016	2	0	44.79
AU_1715	AP	16	Northern GBR	53	Australia	Townsville GBR	Taylor NE Front LTMP2_G3	-17.8121	146.575	14	4	2016	8	2	31.88	N/A	1	1.97	N/A	0	3/1/2016	2	2.32	2.32	2.32	0	44	In-situ	Australian Institute of Marine Science	N/A	N/A	Neal Cantin	N.Cantin@aims.gov.au	AAAA	1	2.25	N/A	N/A	N/A	N/A	-17.825	146.575	1443	6531	10396131	2015-2016	2	0	31.88
AU_1716	AP	16	Northern GBR	53	Australia	Townsville GBR	Taylor NE Front LTMP2_G4	-17.8122	146.575	14	4	2016	5	2	13.35	N/A	1	0.76	N/A	0	3/1/2016	2	2.32	2.32	2.32	0	44	In-situ	Australian Institute of Marine Science	N/A	N/A	Neal Cantin	N.Cantin@aims.gov.au	AAAA	1	2.25	N/A	N/A	N/A	N/A	-17.825	146.575	1443	6531	10396131	2015-2016	2	0	13.35
AU_1717	AP	16	Central GBR	51	Australia	Townsville GBR	Rib North Flat A4	-18.4721	146.875	1	4	2016	2	2	37.44	N/A	1	0.91	N/A	0	3/22/2016	2	2.5	2.5	2.5	0	10	In-situ	Australian Institute of Marine Science	N/A	N/A	Neal Cantin	N.Cantin@aims.gov.au	AAAA	1	3.05	N/A	N/A	N/A	N/A	-18.475	146.875	1430	6537	10302537	2015-2016	2	0	37.44
AU_1718	AP	16	Central GBR	51	Australia	Townsville GBR	Rib NE Front LTMP1	-18.4721	146.879	31	3	2016	3	2	14.1	N/A	0	0.13	N/A	0	3/22/2016	2	2.5	2.5	2.5	0	9	In-situ	Australian Institute of Marine Science	N/A	N/A	Neal Cantin	N.Cantin@aims.gov.au	AAAA	1	3.05	N/A	N/A	N/A	N/A	-18.475	146.875	1430	6537	10302537	2015-2016	2	0	14.1
AU_1719	AP	16	Central GBR	51	Australia	Townsville GBR	Rib NE Front LTMP1	-18.4721	146.879	31	3	2016	6	2	25.88	N/A	0	0.14	N/A	0	3/22/2016	2	2.5	2.5	2.5	0	9	In-situ	Australian Institute of Marine Science	N/A	N/A	Neal Cantin	N.Cantin@aims.gov.au	AAAA	1	3.05	N/A	N/A	N/A	N/A	-18.475	146.875	1430	6537	10302537	2015-2016	2	0	25.88
AU_172	AP	16	Northern GBR	53	Australia	Lizard Island	MP2	-14.6781	145.445	8	9	2015	2	0	0	N/A	0	0	N/A	0	3/30/2016	0	0	0	8.63	0	N/A	In-situ	Laura Richardson	Richardson, L. E., Graham, N. A. J., Pratchett, M. S., Eurich, J. G., and A. S. Hoey. Mass coral bleaching causes biotic homogenization of reef fish assemblages. Global Change Biology, DOI: 10.1111/gcb.14119 (2018).	N/A	Laura Richardson	laura.richardson1@my.jcu.edu.au	AAAA	1	1.72	N/A	N/A	N/A	N/A	-14.675	145.425	1506	6508	10849708	2015-2016	0	0	0
AU_1720	AP	16	Central GBR	51	Australia	Townsville GBR	Rib South Front	-18.492	146.874	31	3	2016	3	2	16.87	N/A	0	0.2	N/A	0	3/22/2016	2	2.5	2.5	2.5	0	9	In-situ	Australian Institute of Marine Science	N/A	N/A	Neal Cantin	N.Cantin@aims.gov.au	AAAA	1	3.05	N/A	N/A	N/A	N/A	-18.475	146.875	1430	6537	10302537	2015-2016	2	0	16.87
AU_1721	AP	16	Central GBR	51	Australia	Townsville GBR	Rib South Front	-18.492	146.874	31	3	2016	8	2	29.52	N/A	0	0.44	N/A	0	3/22/2016	2	2.5	2.5	2.5	0	9	In-situ	Australian Institute of Marine Science	N/A	N/A	Neal Cantin	N.Cantin@aims.gov.au	AAAA	1	3.05	N/A	N/A	N/A	N/A	-18.475	146.875	1430	6537	10302537	2015-2016	2	0	29.52
AU_1722	AP	16	Central GBR	51	Australia	Townsville GBR	Pelorus Island MMP 1	-18.5406	146.489	3	4	2016	2	2	14.81	N/A	2	2.08	N/A	0	3/2/2016	2	2.68	2.53	2.68	0	32	In-situ	Australian Institute of Marine Science	N/A	N/A	Neal Cantin	N.Cantin@aims.gov.au	AAAA	1	2.03	N/A	N/A	N/A	N/A	-18.525	146.475	1429	6529	10295329	2015-2016	2	0	14.81
AU_1723	AP	16	Central GBR	51	Australia	Townsville GBR	Pelorus Island MMP 1	-18.5406	146.489	3	4	2016	5	2	13.04	N/A	2	2.48	N/A	0	3/2/2016	2	2.68	2.53	2.68	0	32	In-situ	Australian Institute of Marine Science	N/A	N/A	Neal Cantin	N.Cantin@aims.gov.au	AAAA	1	2.03	N/A	N/A	N/A	N/A	-18.525	146.475	1429	6529	10295329	2015-2016	2	0	13.04
AU_1724	AP	16	Central GBR	51	Australia	Townsville GBR	Orpheus Isl Cattle Bay MMP	-18.5691	146.482	2	4	2016	2	2	24.55	N/A	0	0	N/A	0	3/2/2016	2	2.69	2.54	2.69	0	31	In-situ	Australian Institute of Marine Science	N/A	N/A	Neal Cantin	N.Cantin@aims.gov.au	AAAA	1	1.74	N/A	N/A	N/A	N/A	-18.575	146.475	1428	6529	10288129	2015-2016	2	0	24.55
AU_1725	AP	16	Central GBR	51	Australia	Townsville GBR	Orpheus Isl Cattle Bay MMP	-18.5691	146.482	2	4	2016	5	2	19.28	N/A	0	0.3	N/A	0	3/2/2016	2	2.69	2.54	2.69	0	31	In-situ	Australian Institute of Marine Science	N/A	N/A	Neal Cantin	N.Cantin@aims.gov.au	AAAA	1	1.74	N/A	N/A	N/A	N/A	-18.575	146.475	1428	6529	10288129	2015-2016	2	0	19.28
AU_1726	AP	16	Central GBR	51	Australia	Townsville GBR	Orpheus Isl Little Pioneer Bay	-18.6015	146.488	2	4	2016	4	2	25.53	N/A	1	0.6	N/A	0	3/1/2016	2	2.53	2.38	2.53	0	32	In-situ	Australian Institute of Marine Science	N/A	N/A	Neal Cantin	N.Cantin@aims.gov.au	AAAA	1	1.59	N/A	N/A	N/A	N/A	-18.625	146.475	1427	6529	10280929	2015-2016	2	0	25.53
AU_1727	AP	16	Central GBR	51	Australia	Townsville GBR	Orpheus Isl Little Pioneer Bay	-18.6015	146.488	2	4	2016	7	2	22.83	N/A	1	0.64	N/A	0	3/1/2016	2	2.53	2.38	2.53	0	32	In-situ	Australian Institute of Marine Science	N/A	N/A	Neal Cantin	N.Cantin@aims.gov.au	AAAA	1	1.59	N/A	N/A	N/A	N/A	-18.625	146.475	1427	6529	10280929	2015-2016	2	0	22.83
AU_1728	AP	16	Central GBR	51	Australia	Townsville GBR	Pandora NW Slope	-18.8128	146.427	4	4	2016	4	2	33.57	N/A	0	0	N/A	0	3/3/2016	2	4.05	4.05	4.05	0	32	In-situ	Australian Institute of Marine Science	N/A	N/A	Neal Cantin	N.Cantin@aims.gov.au	AAAA	1	2.25	N/A	N/A	N/A	N/A	-18.825	146.425	1423	6528	10252128	2015-2016	2	0	33.57
AU_1729	AP	16	Central GBR	51	Australia	Townsville GBR	Pandora NW Slope	-18.8126	146.427	4	4	2016	6	2	29.7	N/A	0	0	N/A	0	3/3/2016	2	4.05	4.05	4.05	0	32	In-situ	Australian Institute of Marine Science	N/A	N/A	Neal Cantin	N.Cantin@aims.gov.au	AAAA	1	2.25	N/A	N/A	N/A	N/A	-18.825	146.425	1423	6528	10252128	2015-2016	2	0	29.7
AU_173	AP	16	Northern GBR	53	Australia	Lizard Island	PO1	-14.6846	145.442	5	9	2015	2	0	0	N/A	0	0	N/A	0	3/30/2016	0	0	0	8.63	0	N/A	In-situ	Laura Richardson	Richardson, L. E., Graham, N. A. J., Pratchett, M. S., Eurich, J. G., and A. S. Hoey. Mass coral bleaching causes biotic homogenization of reef fish assemblages. Global Change Biology, DOI: 10.1111/gcb.14119 (2018).	N/A	Laura Richardson	laura.richardson1@my.jcu.edu.au	AAAA	1	1.72	N/A	N/A	N/A	N/A	-14.675	145.425	1506	6508	10849708	2015-2016	0	0	0
AU_1730	AP	16	Central GBR	51	Australia	Townsville GBR	Esk Island SW M3	-18.7744	146.519	26	4	2016	7	2	17.82	N/A	0	0	N/A	0	3/2/2016	2	2.92	2.45	2.92	0	55	In-situ	Australian Institute of Marine Science	N/A	N/A	Neal Cantin	N.Cantin@aims.gov.au	AAAA	1	2.22	N/A	N/A	N/A	N/A	-18.775	146.525	1424	6530	10259330	2015-2016	2	0	17.82
AU_1731	AP	16	Central GBR	51	Australia	Townsville GBR	Esk Island SW M4	-18.7743	146.519	26	4	2016	4	2	18.45	N/A	0	0.32	N/A	0	3/2/2016	2	2.92	2.45	2.92	0	55	In-situ	Australian Institute of Marine Science	N/A	N/A	Neal Cantin	N.Cantin@aims.gov.au	AAAA	1	2.22	N/A	N/A	N/A	N/A	-18.775	146.525	1424	6530	10259330	2015-2016	2	0	18.45
AU_1732	AP	16	Central GBR	51	Australia	Townsville GBR	Havannah Island MMP1	-18.8472	146.543	6	4	2016	2	2	40.78	N/A	0	0	N/A	0	3/3/2016	2	3.47	3.19	3.47	0	34	In-situ	Australian Institute of Marine Science	N/A	N/A	Neal Cantin	N.Cantin@aims.gov.au	AAAA	1	2.56	N/A	N/A	N/A	N/A	-18.825	146.525	1423	6530	10252130	2015-2016	2	0	40.78
AU_1733	AP	16	Central GBR	51	Australia	Townsville GBR	Havannah Island MMP1	-18.8475	146.543	6	4	2016	5	3	54.98	N/A	1	1.2	N/A	0	3/3/2016	2	3.47	3.19	3.47	0	34	In-situ	Australian Institute of Marine Science	N/A	N/A	Neal Cantin	N.Cantin@aims.gov.au	AAAA	1	2.56	N/A	N/A	N/A	N/A	-18.825	146.525	1423	6530	10252130	2015-2016	3	0	54.98
AU_1734	AP	16	Central GBR	51	Australia	Townsville GBR	Havannah Island MMP2	-18.8464	146.541	6	4	2016	2	2	34.33	N/A	0	0.33	N/A	0	3/3/2016	2	3.47	3.19	3.47	0	34	In-situ	Australian Institute of Marine Science	N/A	N/A	Neal Cantin	N.Cantin@aims.gov.au	AAAA	1	2.56	N/A	N/A	N/A	N/A	-18.825	146.525	1423	6530	10252130	2015-2016	2	0	34.33
AU_1735	AP	16	Central GBR	51	Australia	Townsville GBR	Havannah Island MMP2	-18.8467	146.541	6	4	2016	5	3	53.31	N/A	0	0.32	N/A	0	3/3/2016	2	3.47	3.19	3.47	0	34	In-situ	Australian Institute of Marine Science	N/A	N/A	Neal Cantin	N.Cantin@aims.gov.au	AAAA	1	2.56	N/A	N/A	N/A	N/A	-18.825	146.525	1423	6530	10252130	2015-2016	3	0	53.31
AU_1736	AP	16	Central GBR	51	Australia	Townsville GBR	John Brewer North Flat	-18.6147	147.067	30	3	2016	2	2	13.68	N/A	0	0	N/A	0	3/2/2016	2	1.92	1.92	1.92	0	28	In-situ	Australian Institute of Marine Science	N/A	N/A	Neal Cantin	N.Cantin@aims.gov.au	AAAA	1	2.17	N/A	N/A	N/A	N/A	-18.625	147.075	1427	6541	10280941	2015-2016	2	0	13.68
AU_1737	AP	16	Central GBR	51	Australia	Townsville GBR	John Brewer North East Front	-18.6188	147.081	30	3	2016	3	1	9.52	N/A	0	0.18	N/A	0	3/2/2016	2	1.92	1.92	1.92	0	28	In-situ	Australian Institute of Marine Science	N/A	N/A	Neal Cantin	N.Cantin@aims.gov.au	AAAA	1	2.17	N/A	N/A	N/A	N/A	-18.625	147.075	1427	6541	10280941	2015-2016	1	0	9.52
AU_1738	AP	16	Central GBR	51	Australia	Townsville GBR	John Brewer North East Front	-18.6188	147.081	30	3	2016	7	2	18.63	N/A	0	0.18	N/A	0	3/2/2016	2	1.92	1.92	1.92	0	28	In-situ	Australian Institute of Marine Science	N/A	N/A	Neal Cantin	N.Cantin@aims.gov.au	AAAA	1	2.17	N/A	N/A	N/A	N/A	-18.625	147.075	1427	6541	10280941	2015-2016	2	0	18.63
AU_1739	AP	16	Central GBR	51	Australia	Townsville GBR	John Brewer South Front	-18.6461	147.045	30	3	2016	3	2	12.61	N/A	0	0	N/A	0	3/1/2016	2	1.62	1.62	1.62	0	29	In-situ	Australian Institute of Marine Science	N/A	N/A	Neal Cantin	N.Cantin@aims.gov.au	AAAA	1	2.26	N/A	N/A	N/A	N/A	-18.625	147.025	1427	6540	10280940	2015-2016	2	0	12.61
AU_174	AP	16	Northern GBR	53	Australia	Lizard Island	SC1	-14.6833	145.445	15	9	2015	2	0	0	N/A	0	0	N/A	0	3/30/2016	0	0	0	8.63	0	N/A	In-situ	Laura Richardson	Richardson, L. E., Graham, N. A. J., Pratchett, M. S., Eurich, J. G., and A. S. Hoey. Mass coral bleaching causes biotic homogenization of reef fish assemblages. Global Change Biology, DOI: 10.1111/gcb.14119 (2018).	N/A	Laura Richardson	laura.richardson1@my.jcu.edu.au	AAAA	1	1.72	N/A	N/A	N/A	N/A	-14.675	145.425	1506	6508	10849708	2015-2016	0	0	0
AU_1740	AP	16	Central GBR	51	Australia	Townsville GBR	John Brewer South Front	-18.6461	147.045	30	3	2016	7	2	20.14	N/A	0	0.24	N/A	0	3/1/2016	2	1.62	1.62	1.62	0	29	In-situ	Australian Institute of Marine Science	N/A	N/A	Neal Cantin	N.Cantin@aims.gov.au	AAAA	1	2.26	N/A	N/A	N/A	N/A	-18.625	147.025	1427	6540	10280940	2015-2016	2	0	20.14
AU_1741	AP	16	Central GBR	51	Australia	Townsville GBR	Davies Central Lagoon (AIMS AWS)	-18.8323	147.634	28	3	2016	3	3	78.11	N/A	0	0.27	N/A	0	3/2/2016	2	2.3	2.3	2.3	0	26	In-situ	Australian Institute of Marine Science	N/A	N/A	Neal Cantin	N.Cantin@aims.gov.au	AAAA	1	2.48	N/A	N/A	N/A	N/A	-18.825	147.625	1423	6552	10252152	2015-2016	3	0	78.11
AU_1742	AP	16	Central GBR	51	Australia	Townsville GBR	Davies NE Front LTMP1	-18.806	147.669	29	3	2016	3	3	76.01	N/A	0	0	N/A	0	3/23/2016	2	2.62	2.62	2.62	0	6	In-situ	Australian Institute of Marine Science	N/A	N/A	Neal Cantin	N.Cantin@aims.gov.au	AAAA	1	2.02	N/A	N/A	N/A	N/A	-18.825	147.675	1423	6553	10252153	2015-2016	3	0	76.01
AU_1743	AP	16	Central GBR	51	Australia	Townsville GBR	Davies NE Front LTMP1	-18.806	147.669	29	3	2016	7	3	71.12	N/A	0	2.56	N/A	0	3/23/2016	2	2.62	2.62	2.62	0	6	In-situ	Australian Institute of Marine Science	N/A	N/A	Neal Cantin	N.Cantin@aims.gov.au	AAAA	1	2.02	N/A	N/A	N/A	N/A	-18.825	147.675	1423	6553	10252153	2015-2016	3	0	71.12
AU_1744	AP	16	Central GBR	51	Australia	Townsville GBR	Davies S Front_A2	-18.8478	147.635	28	3	2016	6	2	40.53	N/A	0	0	N/A	0	3/2/2016	2	2.3	2.3	2.3	0	26	In-situ	Australian Institute of Marine Science	N/A	N/A	Neal Cantin	N.Cantin@aims.gov.au	AAAA	1	2.48	N/A	N/A	N/A	N/A	-18.825	147.625	1423	6552	10252152	2015-2016	2	0	40.53
AU_1745	AP	16	Central GBR	51	Australia	Townsville GBR	Davies S Front_A3	-18.8478	147.635	28	3	2016	3	2	38.08	N/A	0	0	N/A	0	3/2/2016	2	2.3	2.3	2.3	0	26	In-situ	Australian Institute of Marine Science	N/A	N/A	Neal Cantin	N.Cantin@aims.gov.au	AAAA	1	2.48	N/A	N/A	N/A	N/A	-18.825	147.625	1423	6552	10252152	2015-2016	2	0	38.08
AU_1746	AP	16	Northern GBR	53	Australia	Cairns GBR	Arlington Flat L1 2m	-16.6424	146.101	24	3	2017	2	3	78.7	N/A	2	16.65	N/A	0	4/2/2017	0	9.29	9.29	10.98	0	N/A	In-situ	Australian Institute of Marine Science	N/A	N/A	Neal Cantin	N.Cantin@aims.gov.au	AAAA	1	5.31	2.56	N/A	N/A	N/A	-16.625	146.125	1467	6522	10568922	2016-2017	3	0	78.7
AU_1747	AP	16	Northern GBR	53	Australia	Cairns GBR	Arlington LTMP1 3m	-16.6465	146.11	24	3	2017	5	3	64.01	N/A	2	12.14	N/A	0	4/2/2017	0	9.29	9.29	10.98	0	N/A	In-situ	Australian Institute of Marine Science	N/A	N/A	Neal Cantin	N.Cantin@aims.gov.au	AAAA	1	5.31	2.56	N/A	N/A	N/A	-16.625	146.125	1467	6522	10568922	2016-2017	3	0	64.01
AU_1748	AP	16	Northern GBR	53	Australia	Cairns GBR	Arlington LTMP1 7m	-16.6465	146.11	24	3	2017	8	3	69.77	N/A	2	11.72	N/A	0	4/2/2017	0	9.29	9.29	10.98	0	N/A	In-situ	Australian Institute of Marine Science	N/A	N/A	Neal Cantin	N.Cantin@aims.gov.au	AAAA	1	5.31	2.56	N/A	N/A	N/A	-16.625	146.125	1467	6522	10568922	2016-2017	3	0	69.77
AU_1749	AP	16	Northern GBR	53	Australia	Cairns GBR	Fitzroy Island West MMP1 5m	-16.9231	145.996	24	3	2017	7	3	74.01	N/A	1	2.48	N/A	0	3/31/2017	0	9.78	9.78	11.11	0	N/A	In-situ	Australian Institute of Marine Science	N/A	N/A	Neal Cantin	N.Cantin@aims.gov.au	AAAA	1	3.15	1.38	N/A	N/A	N/A	-16.925	145.975	1461	6519	10525719	2016-2017	3	0	74.01
AU_175	AP	16	Northern GBR	53	Australia	Lizard Island	SC2	-14.68	145.445	15	9	2015	1	0	0	N/A	0	0	N/A	0	3/30/2016	0	0	0	8.63	0	N/A	In-situ	Laura Richardson	Richardson, L. E., Graham, N. A. J., Pratchett, M. S., Eurich, J. G., and A. S. Hoey. Mass coral bleaching causes biotic homogenization of reef fish assemblages. Global Change Biology, DOI: 10.1111/gcb.14119 (2018).	N/A	Laura Richardson	laura.richardson1@my.jcu.edu.au	AAAA	1	1.72	N/A	N/A	N/A	N/A	-14.675	145.425	1506	6508	10849708	2015-2016	0	0	0
AU_1750	AP	16	Northern GBR	53	Australia	Cairns GBR	Fitzroy Island West MMP1 2m	-16.9233	145.996	25	3	2017	4	3	72.59	N/A	2	14.98	N/A	0	3/31/2017	0	9.96	9.96	11.11	0	N/A	In-situ	Australian Institute of Marine Science	N/A	N/A	Neal Cantin	N.Cantin@aims.gov.au	AAAA	1	3.15	1.38	N/A	N/A	N/A	-16.925	145.975	1461	6519	10525719	2016-2017	3	0	72.59
AU_1751	AP	16	Northern GBR	53	Australia	Cairns GBR	Fitzroy Island West Flat 2m	-16.9234	145.996	25	3	2017	3	3	80.09	N/A	2	14.71	N/A	0	3/31/2017	0	9.96	9.96	11.11	0	N/A	In-situ	Australian Institute of Marine Science	N/A	N/A	Neal Cantin	N.Cantin@aims.gov.au	AAAA	1	3.15	1.38	N/A	N/A	N/A	-16.925	145.975	1461	6519	10525719	2016-2017	3	0	80.09
AU_1752	AP	16	Northern GBR	53	Australia	Cairns GBR	Coates N Flat 2m	-17.1891	146.373	23	3	2017	2	3	94.1	N/A	2	23.44	N/A	0	3/30/2017	0	7.98	7.98	9.22	0	N/A	In-situ	Australian Institute of Marine Science	N/A	N/A	Neal Cantin	N.Cantin@aims.gov.au	AAAA	1	2.47	1.9	N/A	N/A	N/A	-17.175	146.375	1456	6527	10489727	2016-2017	3	0	94.1
AU_1753	AP	16	Northern GBR	53	Australia	Cairns GBR	Coates NE Front D4 4m	-17.1922	146.38	22	3	2017	3	3	87.73	N/A	2	24.42	N/A	0	3/30/2017	0	7.77	7.77	9.22	0	N/A	In-situ	Australian Institute of Marine Science	N/A	N/A	Neal Cantin	N.Cantin@aims.gov.au	AAAA	1	2.47	1.9	N/A	N/A	N/A	-17.175	146.375	1456	6527	10489727	2016-2017	3	0	87.73
AU_1754	AP	16	Northern GBR	53	Australia	Cairns GBR	Coates NE Front K2 7m	-17.1922	146.38	22	3	2017	6	3	80.08	N/A	2	14.64	N/A	0	3/30/2017	0	7.77	7.77	9.22	0	N/A	In-situ	Australian Institute of Marine Science	N/A	N/A	Neal Cantin	N.Cantin@aims.gov.au	AAAA	1	2.47	1.9	N/A	N/A	N/A	-17.175	146.375	1456	6527	10489727	2016-2017	3	0	80.08
AU_1755	AP	16	Northern GBR	53	Australia	Innisfail GBR	Russell Island East Flat 2m	-17.2249	146.094	23	3	2017	4	3	73.48	N/A	2	24.7	N/A	0	3/30/2017	0	9.51	9.51	10.66	0	N/A	In-situ	Australian Institute of Marine Science	N/A	N/A	Neal Cantin	N.Cantin@aims.gov.au	AAAA	1	2.45	1.64	N/A	N/A	N/A	-17.225	146.075	1455	6521	10482521	2016-2017	3	0	73.48
AU_1756	AP	16	Northern GBR	53	Australia	Innisfail GBR	Russell Island West MMP1 2m	-17.227	146.09	23	3	2017	3	3	54.24	N/A	1	10.82	N/A	0	3/30/2017	0	9.51	9.51	10.66	0	N/A	In-situ	Australian Institute of Marine Science	N/A	N/A	Neal Cantin	N.Cantin@aims.gov.au	AAAA	1	2.45	1.64	N/A	N/A	N/A	-17.225	146.075	1455	6521	10482521	2016-2017	3	0	54.24
AU_1757	AP	16	Northern GBR	53	Australia	Innisfail GBR	Russell Island West MMP1 5m	-17.227	146.09	23	3	2017	7	2	35.99	N/A	0	0	N/A	0	3/30/2017	0	9.51	9.51	10.66	0	N/A	In-situ	Australian Institute of Marine Science	N/A	N/A	Neal Cantin	N.Cantin@aims.gov.au	AAAA	1	2.45	1.64	N/A	N/A	N/A	-17.225	146.075	1455	6521	10482521	2016-2017	2	0	35.99
AU_1758	AP	16	Northern GBR	53	Australia	Innisfail GBR	Peart N Flat I2	-17.4654	146.4	22	3	2017	2	3	86.68	N/A	2	40.61	N/A	0	3/29/2017	0	8.29	8.29	9.52	0	N/A	In-situ	Australian Institute of Marine Science	N/A	N/A	Neal Cantin	N.Cantin@aims.gov.au	AAAA	1	2.29	2.27	N/A	N/A	N/A	-17.475	146.375	1450	6527	10446527	2016-2017	3	0	86.68
AU_1759	AP	16	Northern GBR	53	Australia	Innisfail GBR	Peart NE LTMP1 3m	-17.4665	146.403	22	3	2017	2	3	86.66	N/A	2	31.73	N/A	0	3/27/2017	0	7.71	7.71	8.64	0	N/A	In-situ	Australian Institute of Marine Science	N/A	N/A	Neal Cantin	N.Cantin@aims.gov.au	AAAA	1	2.28	2.29	N/A	N/A	N/A	-17.475	146.425	1450	6528	10446528	2016-2017	3	0	86.66
AU_176	AP	16	Northern GBR	53	Australia	Lizard Island	SC3	-14.6712	145.442	15	9	2015	2	0	0	N/A	0	0	N/A	0	3/30/2016	0	0	0	8.63	0	N/A	In-situ	Laura Richardson	Richardson, L. E., Graham, N. A. J., Pratchett, M. S., Eurich, J. G., and A. S. Hoey. Mass coral bleaching causes biotic homogenization of reef fish assemblages. Global Change Biology, DOI: 10.1111/gcb.14119 (2018).	N/A	Laura Richardson	laura.richardson1@my.jcu.edu.au	AAAA	1	1.72	N/A	N/A	N/A	N/A	-14.675	145.425	1506	6508	10849708	2015-2016	0	0	0
AU_1760	AP	16	Northern GBR	53	Australia	Innisfail GBR	Peart NE LTMP1 6m	-17.4665	146.403	22	3	2017	6	3	72.98	N/A	2	20.47	N/A	0	3/27/2017	0	7.71	7.71	8.64	0	N/A	In-situ	Australian Institute of Marine Science	N/A	N/A	Neal Cantin	N.Cantin@aims.gov.au	AAAA	1	2.28	2.29	N/A	N/A	N/A	-17.475	146.425	1450	6528	10446528	2016-2017	3	0	72.98
AU_1761	AP	16	Northern GBR	53	Australia	Innisfail GBR	Feather NE LTMP1 3m	-17.5179	146.391	21	3	2017	4	3	78.46	N/A	2	17.42	N/A	0	3/29/2017	0	7.48	7.48	8.91	0	N/A	In-situ	Australian Institute of Marine Science	N/A	N/A	Neal Cantin	N.Cantin@aims.gov.au	AAAA	1	2.3	2.25	N/A	N/A	N/A	-17.525	146.375	1449	6527	10439327	2016-2017	3	0	78.46
AU_1762	AP	16	Northern GBR	53	Australia	Innisfail GBR	Feather NE LTMP1 7m	-17.5179	146.391	21	3	2017	6	3	64.68	N/A	2	16.71	N/A	0	3/29/2017	0	7.48	7.48	8.91	0	N/A	In-situ	Australian Institute of Marine Science	N/A	N/A	Neal Cantin	N.Cantin@aims.gov.au	AAAA	1	2.3	2.25	N/A	N/A	N/A	-17.525	146.375	1449	6527	10439327	2016-2017	3	0	64.68
AU_1763	AP	16	Northern GBR	53	Australia	Innisfail GBR	Feather North Flat H2 2m	-17.5187	146.387	21	3	2017	2	3	80.41	N/A	2	10.58	N/A	0	3/29/2017	0	7.48	7.48	8.91	0	N/A	In-situ	Australian Institute of Marine Science	N/A	N/A	Neal Cantin	N.Cantin@aims.gov.au	AAAA	1	2.3	2.25	N/A	N/A	N/A	-17.525	146.375	1449	6527	10439327	2016-2017	3	0	80.41
AU_1764	AP	16	Northern GBR	53	Australia	Innisfail GBR	North Barnard MMP1 5m	-17.6717	146.175	20	3	2017	6	2	43.28	N/A	1	1.19	N/A	0	3/30/2017	0	7.31	7.31	8.87	0	N/A	In-situ	Australian Institute of Marine Science	N/A	N/A	Neal Cantin	N.Cantin@aims.gov.au	AAAA	1	2.06	1.32	N/A	N/A	N/A	-17.675	146.175	1446	6523	10417723	2016-2017	2	0	43.28
AU_1765	AP	16	Northern GBR	53	Australia	Innisfail GBR	North Barnard MMP1 2m	-17.6722	146.174	20	3	2017	3	3	52.76	N/A	1	0.59	N/A	0	3/30/2017	0	7.31	7.31	8.87	0	N/A	In-situ	Australian Institute of Marine Science	N/A	N/A	Neal Cantin	N.Cantin@aims.gov.au	AAAA	1	2.06	1.32	N/A	N/A	N/A	-17.675	146.175	1446	6523	10417723	2016-2017	3	0	52.76
AU_1766	AP	16	Northern GBR	53	Australia	Townsville GBR	Farquharson NE Front F1 7m	-17.7803	146.533	19	3	2017	8	3	60.02	N/A	1	5.39	N/A	0	3/29/2017	0	6.71	6.71	8.16	0	N/A	In-situ	Australian Institute of Marine Science	N/A	N/A	Neal Cantin	N.Cantin@aims.gov.au	AAAA	1	2.46	2.25	N/A	N/A	N/A	-17.775	146.525	1444	6530	10403330	2016-2017	3	0	60.02
AU_1767	AP	16	Northern GBR	53	Australia	Townsville GBR	Farquharson NW Flat F3 2m	-17.7914	146.532	19	3	2017	2	3	92.86	N/A	2	20.25	N/A	0	3/29/2017	0	6.71	6.71	8.16	0	N/A	In-situ	Australian Institute of Marine Science	N/A	N/A	Neal Cantin	N.Cantin@aims.gov.au	AAAA	1	2.46	2.25	N/A	N/A	N/A	-17.775	146.525	1444	6530	10403330	2016-2017	3	0	92.86
AU_1768	AP	16	Northern GBR	53	Australia	Townsville GBR	Farquharson NE Front F2 3m	-17.7914	146.532	19	3	2017	4	3	69.87	N/A	2	11.71	N/A	0	3/29/2017	0	6.71	6.71	8.16	0	N/A	In-situ	Australian Institute of Marine Science	N/A	N/A	Neal Cantin	N.Cantin@aims.gov.au	AAAA	1	2.46	2.25	N/A	N/A	N/A	-17.775	146.525	1444	6530	10403330	2016-2017	3	0	69.87
AU_1769	AP	16	Northern GBR	53	Australia	Townsville GBR	Taylor N Flat G1 2m	-17.8115	146.572	18	3	2017	1	3	89.95	N/A	2	24.66	N/A	0	3/27/2017	0	6.12	6.12	7.61	0	N/A	In-situ	Australian Institute of Marine Science	N/A	N/A	Neal Cantin	N.Cantin@aims.gov.au	AAAA	1	2.32	2.25	N/A	N/A	N/A	-17.825	146.575	1443	6531	10396131	2016-2017	3	0	89.95
AU_177	AP	16	Northern GBR	53	Australia	Lizard Island	BP1	-14.685	145.467	27	10	2016	2	3	69.294	N/A	0	0	N/A	0	4/2/2017	0	0	0	8.66	0	N/A	In-situ	Laura Richardson	Richardson, L. E., Graham, N. A. J., Pratchett, M. S., Eurich, J. G., and A. S. Hoey. Mass coral bleaching causes biotic homogenization of reef fish assemblages. Global Change Biology, DOI: 10.1111/gcb.14119 (2018).	N/A	Laura Richardson	laura.richardson1@my.jcu.edu.au	AAAA	1	8.61	1.69	N/A	N/A	N/A	-14.675	145.475	1506	6509	10849709	2016-2017	3	0	69.294
AU_1770	AP	16	Northern GBR	53	Australia	Townsville GBR	Taylor NE Front LTMP2 G4 3m	-17.8121	146.575	18	3	2017	6	3	50.75	N/A	1	4.98	N/A	0	3/27/2017	0	6.12	6.12	7.61	0	N/A	In-situ	Australian Institute of Marine Science	N/A	N/A	Neal Cantin	N.Cantin@aims.gov.au	AAAA	1	2.32	2.25	N/A	N/A	N/A	-17.825	146.575	1443	6531	10396131	2016-2017	3	0	50.75
AU_1771	AP	16	Northern GBR	53	Australia	Townsville GBR	Taylor NE Front LTMP2 G3 7m	-17.8122	146.575	18	3	2017	7	2	50.14	N/A	1	4.37	N/A	0	3/27/2017	0	6.12	6.12	7.61	0	N/A	In-situ	Australian Institute of Marine Science	N/A	N/A	Neal Cantin	N.Cantin@aims.gov.au	AAAA	1	2.32	2.25	N/A	N/A	N/A	-17.825	146.575	1443	6531	10396131	2016-2017	3	1	50.14
AU_1772	AP	16	Central GBR	51	Australia	Townsville GBR	Dunk Isl South MMP1 2m	-17.9589	146.154	17	3	2017	4	2	44.93	N/A	1	3.95	N/A	0	3/29/2017	0	5.83	5.83	7.39	0	N/A	In-situ	Australian Institute of Marine Science	N/A	N/A	Neal Cantin	N.Cantin@aims.gov.au	AAAA	1	1.77	2.01	N/A	N/A	N/A	-17.975	146.175	1440	6523	10374523	2016-2017	2	0	44.93
AU_1773	AP	16	Central GBR	51	Australia	Townsville GBR	Dunk Isl South MMP1 5m	-17.9591	146.154	17	3	2017	7	3	62.01	N/A	1	9.88	N/A	0	3/29/2017	0	5.83	5.83	7.39	0	N/A	In-situ	Australian Institute of Marine Science	N/A	N/A	Neal Cantin	N.Cantin@aims.gov.au	AAAA	1	1.77	2.01	N/A	N/A	N/A	-17.975	146.175	1440	6523	10374523	2016-2017	3	0	62.01
AU_1774	AP	16	Central GBR	51	Australia	Townsville GBR	Rib NE Front LTMP1 D1 6m	-18.4716	146.879	16	3	2017	7	2	48.27	N/A	1	2.92	N/A	0	3/27/2017	0	5.22	5.22	7.44	0	N/A	In-situ	Australian Institute of Marine Science	N/A	N/A	Neal Cantin	N.Cantin@aims.gov.au	AAAA	1	2.5	3.05	N/A	N/A	N/A	-18.475	146.875	1430	6537	10302537	2016-2017	2	0	48.27
AU_1775	AP	16	Central GBR	51	Australia	Townsville GBR	Rib North Flat A4 2m	-18.4721	146.875	16	3	2017	2	3	83.05	N/A	1	4.03	N/A	0	3/27/2017	0	5.22	5.22	7.44	0	N/A	In-situ	Australian Institute of Marine Science	N/A	N/A	Neal Cantin	N.Cantin@aims.gov.au	AAAA	1	2.5	3.05	N/A	N/A	N/A	-18.475	146.875	1430	6537	10302537	2016-2017	3	0	83.05
AU_1776	AP	16	Central GBR	51	Australia	Townsville GBR	Rib NE Front LTMP1 D2 3m	-18.4721	146.879	16	3	2017	4	2	49.61	N/A	1	1.28	N/A	0	3/27/2017	0	5.22	5.22	7.44	0	N/A	In-situ	Australian Institute of Marine Science	N/A	N/A	Neal Cantin	N.Cantin@aims.gov.au	AAAA	1	2.5	3.05	N/A	N/A	N/A	-18.475	146.875	1430	6537	10302537	2016-2017	2	0	49.61
AU_1777	AP	16	Central GBR	51	Australia	Townsville GBR	John Brewer North Flat C1 2m	-18.6147	147.067	1	4	2017	2	3	77.83	N/A	1	4.25	N/A	0	3/24/2017	2	5.7	5.7	5.7	0	8	In-situ	Australian Institute of Marine Science	N/A	N/A	Neal Cantin	N.Cantin@aims.gov.au	AAAA	1	1.92	2.17	N/A	N/A	N/A	-18.625	147.075	1427	6541	10280941	2016-2017	3	0	77.83
AU_1778	AP	16	Central GBR	51	Australia	Townsville GBR	John Brewer LTMP1 3m	-18.6188	147.081	1	4	2017	3	3	62.07	N/A	1	2.36	N/A	0	3/24/2017	2	5.7	5.7	5.7	0	8	In-situ	Australian Institute of Marine Science	N/A	N/A	Neal Cantin	N.Cantin@aims.gov.au	AAAA	1	1.92	2.17	N/A	N/A	N/A	-18.625	147.075	1427	6541	10280941	2016-2017	3	0	62.07
AU_1779	AP	16	Central GBR	51	Australia	Townsville GBR	John Brewer LTMP1 6m	-18.6188	147.081	1	4	2017	8	3	58.28	N/A	1	6.7	N/A	0	3/24/2017	2	5.7	5.7	5.7	0	8	In-situ	Australian Institute of Marine Science	N/A	N/A	Neal Cantin	N.Cantin@aims.gov.au	AAAA	1	1.92	2.17	N/A	N/A	N/A	-18.625	147.075	1427	6541	10280941	2016-2017	3	0	58.28
AU_178	AP	16	Northern GBR	53	Australia	Lizard Island	BP2	-14.6884	145.465	27	10	2016	4	3	74.2054	N/A	0	0	N/A	0	4/2/2017	0	0	0	8.66	0	N/A	In-situ	Laura Richardson	Richardson, L. E., Graham, N. A. J., Pratchett, M. S., Eurich, J. G., and A. S. Hoey. Mass coral bleaching causes biotic homogenization of reef fish assemblages. Global Change Biology, DOI: 10.1111/gcb.14119 (2018).	N/A	Laura Richardson	laura.richardson1@my.jcu.edu.au	AAAA	1	8.61	1.69	N/A	N/A	N/A	-14.675	145.475	1506	6509	10849709	2016-2017	3	0	74.205
AU_1780	AP	16	Central GBR	51	Australia	Townsville GBR	Pandora NW Slope E4 3.7m	-18.8126	146.427	15	3	2017	4	2	31.72	N/A	0	0.37	N/A	0	3/27/2017	0	6.72	6.72	8.52	0	N/A	In-situ	Australian Institute of Marine Science	N/A	N/A	Neal Cantin	N.Cantin@aims.gov.au	AAAA	1	4.05	2.25	N/A	N/A	N/A	-18.825	146.425	1423	6528	10252128	2016-2017	2	0	31.72
AU_1781	AP	16	Central GBR	51	Australia	Townsville GBR	Pandora NW Slope E3 5.6m	-18.8128	146.427	15	3	2017	5	2	34.37	N/A	1	0.7	N/A	0	3/27/2017	0	6.72	6.72	8.52	0	N/A	In-situ	Australian Institute of Marine Science	N/A	N/A	Neal Cantin	N.Cantin@aims.gov.au	AAAA	1	4.05	2.25	N/A	N/A	N/A	-18.825	146.425	1423	6528	10252128	2016-2017	2	0	34.37
AU_1782	AP	16	Central GBR	51	Australia	Townsville GBR	Pandora NW Flat	-18.813	146.427	15	3	2017	3	2	33.58	N/A	0	0	N/A	0	3/27/2017	0	6.72	6.72	8.52	0	N/A	In-situ	Australian Institute of Marine Science	N/A	N/A	Neal Cantin	N.Cantin@aims.gov.au	AAAA	1	4.05	2.25	N/A	N/A	N/A	-18.825	146.425	1423	6528	10252128	2016-2017	2	0	33.58
AU_1783	AP	16	Central GBR	51	Australia	Townsville GBR	Havannah Island Flat	-18.8463	146.541	14	3	2017	3	3	62.7	N/A	1	5.34	N/A	0	3/27/2017	0	6.62	6.62	8.85	0	N/A	In-situ	Australian Institute of Marine Science	N/A	N/A	Neal Cantin	N.Cantin@aims.gov.au	AAAA	1	3.47	2.56	N/A	N/A	N/A	-18.825	146.525	1423	6530	10252130	2016-2017	3	0	62.7
AU_1784	AP	16	Central GBR	51	Australia	Townsville GBR	Havannah Island MMP2 2m	-18.8464	146.541	14	3	2017	5	3	62.72	N/A	1	3.2	N/A	0	3/27/2017	0	6.62	6.62	8.85	0	N/A	In-situ	Australian Institute of Marine Science	N/A	N/A	Neal Cantin	N.Cantin@aims.gov.au	AAAA	1	3.47	2.56	N/A	N/A	N/A	-18.825	146.525	1423	6530	10252130	2016-2017	3	0	62.72
AU_1785	AP	16	Central GBR	51	Australia	Townsville GBR	Havannah Island MMP2 5m	-18.8467	146.541	14	3	2017	6	3	52.34	N/A	1	2.18	N/A	0	3/27/2017	0	6.62	6.62	8.85	0	N/A	In-situ	Australian Institute of Marine Science	N/A	N/A	Neal Cantin	N.Cantin@aims.gov.au	AAAA	1	3.47	2.56	N/A	N/A	N/A	-18.825	146.525	1423	6530	10252130	2016-2017	3	0	52.34
AU_1786	AP	16	Northern Coral Sea Islands	110	Australia	Coral Sea	Lihou	-17.415	151.866	17	4	2017	2	3	53	N/A	2	40.9	N/A	0	3/22/2017	2	10.74	8	10.74	0	26	In-situ	Hugo B. Harrison	Harrison H.B. Alvarez-Noriega M. Baird A.H. Heron S.F. MacDonald C. Hughes T.P. in prep. Back to back coral bleaching events on isolated atolls in the Coral Sea.	N/A	Hugo B. Harrison	hugo.harrison@my.jcu.edu.au	AAAA	1	4.32	1.06	N/A	N/A	N/A	-17.425	151.875	1451	6637	10453837	2016-2017	3	0	53
AU_1787	AP	16	Northern Coral Sea Islands	110	Australia	Coral Sea	Lihou	-17.415	151.866	17	4	2017	6	3	55.5	N/A	1	8.9	N/A	0	3/22/2017	2	10.74	8	10.74	0	26	In-situ	Hugo B. Harrison	Harrison H.B. Alvarez-Noriega M. Baird A.H. Heron S.F. MacDonald C. Hughes T.P. in prep. Back to back coral bleaching events on isolated atolls in the Coral Sea.	N/A	Hugo B. Harrison	hugo.harrison@my.jcu.edu.au	AAAA	1	4.32	1.06	N/A	N/A	N/A	-17.425	151.875	1451	6637	10453837	2016-2017	3	0	55.5
AU_1788	AP	16	Northern Coral Sea Islands	110	Australia	Coral Sea	Lihou	-17.4101	151.881	16	5	2016	2	3	78.1	N/A	2	11.8	N/A	0	3/22/2016	2	4.32	1.11	4.32	0	55	In-situ	Hugo B. Harrison	Harrison H.B. Alvarez-Noriega M. Baird A.H. Heron S.F. MacDonald C. Hughes T.P. in prep. Back to back coral bleaching events on isolated atolls in the Coral Sea.	N/A	Hugo B. Harrison	hugo.harrison@my.jcu.edu.au	AAAA	1	1.06	N/A	N/A	N/A	N/A	-17.425	151.875	1451	6637	10453837	2015-2016	3	0	78.1
AU_1789	AP	16	Northern Coral Sea Islands	110	Australia	Coral Sea	Lihou	-17.4101	151.881	16	5	2016	6	3	78.3	N/A	1	5.7	N/A	0	3/22/2016	2	4.32	1.11	4.32	0	55	In-situ	Hugo B. Harrison	Harrison H.B. Alvarez-Noriega M. Baird A.H. Heron S.F. MacDonald C. Hughes T.P. in prep. Back to back coral bleaching events on isolated atolls in the Coral Sea.	N/A	Hugo B. Harrison	hugo.harrison@my.jcu.edu.au	AAAA	1	1.06	N/A	N/A	N/A	N/A	-17.425	151.875	1451	6637	10453837	2015-2016	3	0	78.3
AU_179	AP	16	Northern GBR	53	Australia	Lizard Island	BP3	-14.6854	145.46	27	10	2016	3	3	59.9432	N/A	0	0	N/A	0	4/2/2017	0	0	0	8.66	0	N/A	In-situ	Laura Richardson	Richardson, L. E., Graham, N. A. J., Pratchett, M. S., Eurich, J. G., and A. S. Hoey. Mass coral bleaching causes biotic homogenization of reef fish assemblages. Global Change Biology, DOI: 10.1111/gcb.14119 (2018).	N/A	Laura Richardson	laura.richardson1@my.jcu.edu.au	AAAA	1	8.61	1.69	N/A	N/A	N/A	-14.675	145.475	1506	6509	10849709	2016-2017	3	0	59.943
AU_1790	AP	16	Northern Coral Sea Islands	110	Australia	Coral Sea	Lihou	-17.4101	151.881	17	4	2017	2	2	31.7	N/A	2	29.3	N/A	0	3/22/2017	2	10.74	8	10.74	0	26	In-situ	Hugo B. Harrison	Harrison H.B. Alvarez-Noriega M. Baird A.H. Heron S.F. MacDonald C. Hughes T.P. in prep. Back to back coral bleaching events on isolated atolls in the Coral Sea.	N/A	Hugo B. Harrison	hugo.harrison@my.jcu.edu.au	AAAA	1	4.32	1.06	N/A	N/A	N/A	-17.425	151.875	1451	6637	10453837	2016-2017	2	0	31.7
AU_1791	AP	16	Northern Coral Sea Islands	110	Australia	Coral Sea	Lihou	-17.4101	151.881	17	4	2017	6	2	47.8	N/A	2	26.1	N/A	0	3/22/2017	2	10.74	8	10.74	0	26	In-situ	Hugo B. Harrison	Harrison H.B. Alvarez-Noriega M. Baird A.H. Heron S.F. MacDonald C. Hughes T.P. in prep. Back to back coral bleaching events on isolated atolls in the Coral Sea.	N/A	Hugo B. Harrison	hugo.harrison@my.jcu.edu.au	AAAA	1	4.32	1.06	N/A	N/A	N/A	-17.425	151.875	1451	6637	10453837	2016-2017	2	0	47.8
AU_1792	AP	16	Northern Coral Sea Islands	110	Australia	Coral Sea	Lihou	-17.4748	151.746	16	5	2016	2	3	78.1	N/A	1	9.5	N/A	0	3/17/2016	2	3.88	0.82	3.88	0	60	In-situ	Hugo B. Harrison	Harrison H.B. Alvarez-Noriega M. Baird A.H. Heron S.F. MacDonald C. Hughes T.P. in prep. Back to back coral bleaching events on isolated atolls in the Coral Sea.	N/A	Hugo B. Harrison	hugo.harrison@my.jcu.edu.au	AAAA	1	1.11	N/A	N/A	N/A	N/A	-17.475	151.725	1450	6634	10446634	2015-2016	3	0	78.1
AU_1793	AP	16	Northern Coral Sea Islands	110	Australia	Coral Sea	Lihou	-17.4748	151.746	16	5	2016	6	3	62.7	N/A	1	3.6	N/A	0	3/17/2016	2	3.88	0.82	3.88	0	60	In-situ	Hugo B. Harrison	Harrison H.B. Alvarez-Noriega M. Baird A.H. Heron S.F. MacDonald C. Hughes T.P. in prep. Back to back coral bleaching events on isolated atolls in the Coral Sea.	N/A	Hugo B. Harrison	hugo.harrison@my.jcu.edu.au	AAAA	1	1.11	N/A	N/A	N/A	N/A	-17.475	151.725	1450	6634	10446634	2015-2016	3	0	62.7
AU_1794	AP	16	Northern Coral Sea Islands	110	Australia	Coral Sea	Lihou	-17.4748	151.746	17	4	2017	2	2	34.9	N/A	2	44.2	N/A	0	3/22/2017	2	11.22	8.62	11.22	0	26	In-situ	Hugo B. Harrison	Harrison H.B. Alvarez-Noriega M. Baird A.H. Heron S.F. MacDonald C. Hughes T.P. in prep. Back to back coral bleaching events on isolated atolls in the Coral Sea.	N/A	Hugo B. Harrison	hugo.harrison@my.jcu.edu.au	AAAA	1	3.88	1.11	N/A	N/A	N/A	-17.475	151.725	1450	6634	10446634	2016-2017	2	0	34.9
AU_1795	AP	16	Northern Coral Sea Islands	110	Australia	Coral Sea	Lihou	-17.4748	151.746	17	4	2017	6	2	37.5	N/A	1	8.9	N/A	0	3/22/2017	2	11.22	8.62	11.22	0	26	In-situ	Hugo B. Harrison	Harrison H.B. Alvarez-Noriega M. Baird A.H. Heron S.F. MacDonald C. Hughes T.P. in prep. Back to back coral bleaching events on isolated atolls in the Coral Sea.	N/A	Hugo B. Harrison	hugo.harrison@my.jcu.edu.au	AAAA	1	3.88	1.11	N/A	N/A	N/A	-17.475	151.725	1450	6634	10446634	2016-2017	2	0	37.5
AU_1796	AP	16	Northern Coral Sea Islands	110	Australia	Coral Sea	Chilcott	-16.9262	150.006	16	5	2016	2	3	72	N/A	2	24.4	N/A	0	3/24/2016	2	8.4	3.8	8.4	0	53	In-situ	Hugo B. Harrison	Harrison H.B. Alvarez-Noriega M. Baird A.H. Heron S.F. MacDonald C. Hughes T.P. in prep. Back to back coral bleaching events on isolated atolls in the Coral Sea.	N/A	Hugo B. Harrison	hugo.harrison@my.jcu.edu.au	AAAA	1	1.33	N/A	N/A	N/A	N/A	-16.925	150.025	1461	6600	10525800	2015-2016	3	0	72
AU_1797	AP	16	Northern Coral Sea Islands	110	Australia	Coral Sea	Chilcott	-16.9262	150.006	16	5	2016	6	3	57.7	N/A	1	9.6	N/A	0	3/24/2016	2	8.4	3.8	8.4	0	53	In-situ	Hugo B. Harrison	Harrison H.B. Alvarez-Noriega M. Baird A.H. Heron S.F. MacDonald C. Hughes T.P. in prep. Back to back coral bleaching events on isolated atolls in the Coral Sea.	N/A	Hugo B. Harrison	hugo.harrison@my.jcu.edu.au	AAAA	1	1.33	N/A	N/A	N/A	N/A	-16.925	150.025	1461	6600	10525800	2015-2016	3	0	57.7
AU_1798	AP	16	Northern Coral Sea Islands	110	Australia	Coral Sea	Chilcott	-16.9387	149.994	16	5	2016	2	3	70.5	N/A	2	20.2	N/A	0	3/24/2016	2	8.04	3.8	8.04	0	53	In-situ	Hugo B. Harrison	Harrison H.B. Alvarez-Noriega M. Baird A.H. Heron S.F. MacDonald C. Hughes T.P. in prep. Back to back coral bleaching events on isolated atolls in the Coral Sea.	N/A	Hugo B. Harrison	hugo.harrison@my.jcu.edu.au	AAAA	1	1.32	N/A	N/A	N/A	N/A	-16.925	149.975	1461	6599	10525799	2015-2016	3	0	70.5
AU_1799	AP	16	Northern Coral Sea Islands	110	Australia	Coral Sea	Chilcott	-16.9387	149.994	16	5	2016	6	3	65.8	N/A	1	9.2	N/A	0	3/24/2016	2	8.04	3.8	8.04	0	53	In-situ	Hugo B. Harrison	Harrison H.B. Alvarez-Noriega M. Baird A.H. Heron S.F. MacDonald C. Hughes T.P. in prep. Back to back coral bleaching events on isolated atolls in the Coral Sea.	N/A	Hugo B. Harrison	hugo.harrison@my.jcu.edu.au	AAAA	1	1.32	N/A	N/A	N/A	N/A	-16.925	149.975	1461	6599	10525799	2015-2016	3	0	65.8
AU_180	AP	16	Northern GBR	53	Australia	Lizard Island	DGD1	-14.6475	145.454	25	10	2016	5	2	39.5021	N/A	0	0	N/A	0	4/2/2017	0	0	0	8.36	0	N/A	In-situ	Laura Richardson	Richardson, L. E., Graham, N. A. J., Pratchett, M. S., Eurich, J. G., and A. S. Hoey. Mass coral bleaching causes biotic homogenization of reef fish assemblages. Global Change Biology, DOI: 10.1111/gcb.14119 (2018).	N/A	Laura Richardson	laura.richardson1@my.jcu.edu.au	AAAA	1	9.51	1.71	N/A	N/A	N/A	-14.625	145.475	1507	6509	10856909	2016-2017	2	0	39.502
AU_1800	AP	16	Northern Coral Sea Islands	110	Australia	Coral Sea	Chilcott	-16.9265	150.004	17	4	2017	6	2	47.4	N/A	0	0	N/A	0	3/23/2017	2	8.28	6.66	8.28	0	25	In-situ	Hugo B. Harrison	Harrison H.B. Alvarez-Noriega M. Baird A.H. Heron S.F. MacDonald C. Hughes T.P. in prep. Back to back coral bleaching events on isolated atolls in the Coral Sea.	N/A	Hugo B. Harrison	hugo.harrison@my.jcu.edu.au	AAAA	1	8.4	1.33	N/A	N/A	N/A	-16.925	150.025	1461	6600	10525800	2016-2017	2	0	47.4
AU_1801	AP	16	Northern Coral Sea Islands	110	Australia	Coral Sea	Chilcott	-16.9298	150	17	4	2017	6	2	28.6	N/A	0	0	N/A	0	3/23/2017	2	8.28	6.66	8.28	0	25	In-situ	Hugo B. Harrison	Harrison H.B. Alvarez-Noriega M. Baird A.H. Heron S.F. MacDonald C. Hughes T.P. in prep. Back to back coral bleaching events on isolated atolls in the Coral Sea.	N/A	Hugo B. Harrison	hugo.harrison@my.jcu.edu.au	AAAA	1	8.4	1.33	N/A	N/A	N/A	-16.925	150.025	1461	6600	10525800	2016-2017	2	0	28.6
AU_1802	AP	16	Northern Coral Sea Islands	110	Australia	Coral Sea	Lihou	-17.5991	151.488	17	4	2017	2	2	39.3	N/A	2	25	N/A	0	3/23/2017	2	10.46	7.84	10.46	0	25	In-situ	Hugo B. Harrison	Harrison H.B. Alvarez-Noriega M. Baird A.H. Heron S.F. MacDonald C. Hughes T.P. in prep. Back to back coral bleaching events on isolated atolls in the Coral Sea.	N/A	Hugo B. Harrison	hugo.harrison@my.jcu.edu.au	AAAA	1	4.41	1.43	N/A	N/A	N/A	-17.575	151.475	1448	6629	10432229	2016-2017	2	0	39.3
AU_1803	AP	16	Northern Coral Sea Islands	110	Australia	Coral Sea	Lihou	-17.5991	151.488	17	4	2017	6	2	22.2	N/A	2	11.1	N/A	0	3/23/2017	2	10.46	7.84	10.46	0	25	In-situ	Hugo B. Harrison	Harrison H.B. Alvarez-Noriega M. Baird A.H. Heron S.F. MacDonald C. Hughes T.P. in prep. Back to back coral bleaching events on isolated atolls in the Coral Sea.	N/A	Hugo B. Harrison	hugo.harrison@my.jcu.edu.au	AAAA	1	4.41	1.43	N/A	N/A	N/A	-17.575	151.475	1448	6629	10432229	2016-2017	2	0	22.2
AU_1804	AP	16	Northern Coral Sea Islands	110	Australia	Coral Sea	Lihou	-17.5911	151.498	16	5	2016	2	3	89.5	N/A	1	4.9	N/A	0	3/17/2016	2	4.41	1.29	4.41	0	60	In-situ	Hugo B. Harrison	Harrison H.B. Alvarez-Noriega M. Baird A.H. Heron S.F. MacDonald C. Hughes T.P. in prep. Back to back coral bleaching events on isolated atolls in the Coral Sea.	N/A	Hugo B. Harrison	hugo.harrison@my.jcu.edu.au	AAAA	1	1.43	N/A	N/A	N/A	N/A	-17.575	151.475	1448	6629	10432229	2015-2016	3	0	89.5
[truncated: 14,213 more rows]
[truncated: 3 more columns]

## Sheet: Regions and Countries
Regions	Acronym		Regional and country groupings
Caribbean-Atlantic	CA		Country	Country_Acronym	Region	Region_Acronym
[truncated: 89 more rows]

## Sheet: Codes
BLEACHING SEVERITY CODE
[truncated: 23 more rows]
